# Supplementary material for: MftG is crucial for ethanol metabolism of mycobacteria by linking mycofactocin oxidation to respiration
Source: bioRxiv preprint, doi:10.1101/2024.03.26.586840, version 4 (2024-10-31)
Supplement: Supplementary Table S2 [file 586840_file05.xlsx]

## Sheet: ∆mftG vs WT on 10 gL-1 ethanol
Gene	baseMean	log2FoldChange	lfcSE	stat	pvalue	padj	wt_etoh1	wt_etoh2	wt_etoh3	mftG_etoh1	mftG_etoh2	mftG_etoh3	locus_tag	annotation		Description	Gene expression in DmftG mutants compared to wild type of M. smegmatis MC2 155 grown on 10 g L-1 ethanol as the sole carbon source.
MSMEG_0420	306.585	6.24252	0.23986	26.0257	2.53827e-149	5.43224e-148	10.2803	6.32999	7.09851	643.421	632.472	539.909	MSMEG_RS02060	hypothetical protein
MSMEG_2059	184.079	6.19596	0.299836	20.6645	7.22928e-95	9.55969e-94	3.57576	4.06928	7.64455	346.943	413.54	328.705	MSMEG_RS09995	NADH-quinone oxidoreductase subunit NuoE		Legend
MSMEG_2062	81.9664	6.17012	0.433215	14.2426	4.9807e-46	3.4074e-45	0	2.71285	4.36832	160.855	172.152	151.71	MSMEG_RS10010	NADH-quinone oxidoreductase subunit B		baseMean	mean of all normalized read counts
MSMEG_2058	470.813	6.14796	0.194341	31.6349	1.22282e-219	4.39539e-218	16.5379	10.8514	11.4668	996.672	935.61	853.74	MSMEG_RS09990	NADH-quinone oxidoreductase subunit NuoF		log2FoldChange	log2 of fold change (mftG/WT)
MSMEG_RS05500	8708.86	6.13768	0.137556	44.6195	0	0	307.069	207.985	215.686	19217.5	16311.4	15993.5	MSMEG_RS05500	hypothetical protein		lfcSE	Standard error of log2FoldChange
MSMEG_0331	488.832	6.08641	0.192708	31.5836	6.21024e-219	2.20786e-217	18.7727	11.7557	11.4668	1009.29	1016.07	865.639	MSMEG_RS01630	GAF domain-containing protein		stat	Value of the statistic of DEseq2
MSMEG_5650	203.506	5.85542	0.270554	21.6423	7.18322e-104	1.03853e-102	8.49243	5.87785	6.00643	463.642	409.797	327.217	MSMEG_RS27230	AMP-binding protein		pvalue	p-value
MSMEG_4969	4089.1	5.70165	0.0877756	64.9571	0	0	151.97	162.319	147.431	8301.4	8154.78	7616.73	MSMEG_RS23955	response regulator transcription factor		padj	Adjusted p-value (Benjamini-Hochberg)
MSMEG_2061	143.904	5.64933	0.286824	19.6961	2.32795e-86	2.78925e-85	4.91667	5.42571	6.55247	305.94	278.812	261.774	MSMEG_RS10005	NADH-quinone oxidoreductase subunit C		black	all genes with padj ≤ 0,05
MSMEG_5403	1603.67	5.60021	0.115751	48.3815	0	0	76.4319	62.8478	54.0579	3040.48	3182.95	3205.24	MSMEG_RS26040	cobalt-translocating P-type ATPase CtpD		grey	all genes with padj > 0.05
MSMEG_1970	5325.99	5.56658	0.0825185	67.4586	0	0	226.614	221.098	211.863	10569.1	10851.2	9876.02	MSMEG_RS09560	transcriptional regulator MimR
MSMEG_2060	266.864	5.53871	0.214746	25.7919	1.09205e-146	2.27719e-145	11.6212	10.3993	11.4668	583.495	512.714	471.491	MSMEG_RS10000	NADH-quinone oxidoreductase subunit D
MSMEG_0330	401.825	5.53624	0.185043	29.9187	1.12337e-196	3.41526e-195	16.0909	17.1814	18.0193	712.81	748.488	898.361	MSMEG_RS01625	GAF domain-containing protein
MSMEG_3781	249.136	5.51424	0.230218	23.9523	8.74654e-127	1.51343e-125	16.0909	8.13856	7.09851	523.568	507.101	432.819	MSMEG_RS18330	DUF2236 domain-containing protein
MSMEG_RS05495	6554.59	5.47443	0.120392	45.4715	0	0	331.205	266.764	265.921	14842.8	11826.1	11794.7	MSMEG_RS05495	hypothetical protein
MSMEG_RS25530	7451.54	5.2765	0.0751319	70.2298	0	0	394.228	369.4	359.84	14682	14878.1	14025.7	MSMEG_RS25530	hypothetical protein
MSMEG_4970	5582.23	5.26722	0.0801228	65.7393	0	0	270.864	281.685	295.407	11439.7	10733.3	10472.4	MSMEG_RS23960	hypothetical protein
MSMEG_2708	145.383	5.2313	0.272877	19.1709	6.47483e-82	7.39039e-81	7.15152	7.68642	7.64455	299.632	325.592	224.59	MSMEG_RS13135	hypothetical protein
MSMEG_2711	1040.39	5.19231	0.117189	44.3071	0	0	56.7652	53.3528	56.2421	1961.8	2168.74	1945.46	MSMEG_RS13145	carbamoyltransferase HypF
MSMEG_4968	5213.43	5.13227	0.0801881	64.0029	0	0	298.129	286.206	281.756	10720.5	9997.93	9696.05	MSMEG_RS23950	sensor domain-containing protein
MSMEG_6027	92.8277	5.10363	0.312987	16.3062	8.91731e-60	7.66394e-59	7.59849	4.97357	2.7302	186.088	188.993	166.583	MSMEG_RS29060	MHS family MFS transporter
MSMEG_2710	259.191	5.06558	0.196096	25.8321	3.87042e-147	8.09678e-146	16.9849	13.1121	14.7431	526.722	531.427	452.155	MSMEG_RS13140	hypothetical protein
MSMEG_2705	351.058	5.03074	0.164932	30.502	2.45166e-204	7.74296e-203	21.0076	21.2507	20.2035	681.27	668.026	694.593	MSMEG_RS13120	hydrogenase expression/formation protein HypE
MSMEG_2706	344.212	5.02737	0.182408	27.5611	3.2583e-167	7.88047e-166	16.5379	17.6336	27.848	741.196	641.828	620.226	MSMEG_RS13125	SIS domain-containing protein
MSMEG_5298	6692.59	5.00029	0.0902721	55.3913	0	0	428.197	392.912	394.24	14142.7	12907.7	11889.9	MSMEG_RS25535	hypothetical protein
MSMEG_2172	374.415	4.92568	0.166371	29.6067	1.22691e-192	3.62829e-191	17.4318	25.32	29.4861	728.58	746.617	699.055	MSMEG_RS10535	hypothetical protein
MSMEG_0419	362.752	4.91881	0.165375	29.7433	2.11847e-194	6.29351e-193	24.1364	19.8943	25.6639	734.888	727.905	644.023	MSMEG_RS02055	membrane protein
MSMEG_1969	640.59	4.91776	0.13454	36.5524	1.63264e-292	8.17075e-291	46.4849	40.2407	36.0386	1195.38	1195.71	1329.69	MSMEG_RS09555	MerR family transcriptional regulator
MSMEG_5297	2542.93	4.91519	0.0852372	57.6649	0	0	160.015	169.553	159.444	4945.51	5063.52	4759.53	MSMEG_RS25525	oxalyl-CoA decarboxylase
MSMEG_2707	264.85	4.872	0.205862	23.6663	8.02064e-124	1.36246e-122	21.9015	12.2078	18.0193	577.187	531.427	428.357	MSMEG_RS13130	hypothetical protein
MSMEG_3962	1397.43	4.85498	0.104011	46.6774	0	0	96.0986	94.0456	90.0965	2576.84	2619.71	2907.77	MSMEG_RS19205	alpha-hydroxy-acid oxidizing protein
MSMEG_0748	124.876	4.7776	0.253808	18.8237	4.83298e-79	5.29349e-78	8.04546	6.32999	12.5589	230.244	252.615	239.464	MSMEG_RS03645	MoxR family ATPase
MSMEG_2056	154.791	4.7587	0.229134	20.7682	8.38796e-96	1.12288e-94	12.0682	9.49499	11.4668	302.786	323.721	269.211	MSMEG_RS09980	NADH-quinone oxidoreductase subunit NuoH
MSMEG_0574	1018.75	4.74333	0.131064	36.1909	8.45073e-287	4.10302e-285	85.8183	70.9863	61.7025	2125.81	2019.05	1749.13	MSMEG_RS02785	sigma-70 family RNA polymerase sigma factor
MSMEG_1971	104.127	4.73877	0.272494	17.3904	9.75667e-68	9.33484e-67	8.04546	8.5907	5.46039	217.628	202.092	182.944	MSMEG_RS09565	methane monooxygenase
MSMEG_6693	367.146	4.71227	0.170368	27.6594	2.15175e-168	5.30277e-167	35.3106	20.3464	25.1178	703.348	666.154	752.6	MSMEG_RS32270	glutamine synthetase
MSMEG_6694	67.1569	4.70441	0.330284	14.2435	4.91706e-46	3.37096e-45	5.36364	4.97357	4.36832	135.623	136.599	116.013	MSMEG_RS32275	ferredoxin
MSMEG_2057	347.682	4.69679	0.17047	27.552	4.19172e-167	1.01005e-165	33.5228	20.7985	22.9337	627.651	722.291	658.897	MSMEG_RS09985	NADH-quinone oxidoreductase subunit G
MSMEG_2052	229.421	4.67293	0.190189	24.57	2.64506e-133	4.88885e-132	17.4318	18.0857	15.8351	485.72	437.866	401.585	MSMEG_RS09960	NADH-quinone oxidoreductase subunit L
MSMEG_6790	248.766	4.65443	0.1958	23.7713	6.61063e-125	1.1348e-123	12.5152	18.5378	26.7559	501.49	460.32	472.978	MSMEG_RS32730	sugar phosphate isomerase/epimerase
MSMEG_1372	51.0558	4.63191	0.367282	12.6113	1.82965e-36	1.05249e-35	4.02273	4.06928	3.82228	91.4667	104.788	98.1652	MSMEG_RS06700	sugar ABC transporter ATP-binding protein
MSMEG_5336	275.406	4.62265	0.176518	26.1879	3.64777e-151	7.83248e-150	26.3712	21.2507	16.3812	498.336	557.624	532.472	MSMEG_RS25715	AmiS/UreI family transporter
MSMEG_4209	46.7044	4.61681	0.388998	11.8685	1.72588e-32	8.9685e-32	4.91667	4.06928	1.63812	94.6208	91.6898	83.2917	MSMEG_RS20370	tripartite tricarboxylate transporter TctB family protein
MSMEG_2051	208.212	4.61589	0.191919	24.0512	8.10172e-128	1.42459e-126	16.0909	16.7293	15.8351	425.793	391.085	383.737	MSMEG_RS09955	NADH-quinone oxidoreductase subunit M
MSMEG_0204	121.511	4.61556	0.253562	18.2029	4.89452e-74	4.98338e-73	8.9394	8.13856	11.4668	271.246	200.221	229.052	MSMEG_RS01000	hypothetical protein
MSMEG_6239	6946.2	4.58326	0.0751604	60.9797	0	0	581.061	549.805	537.303	13246.9	13972.4	12789.7	MSMEG_RS30095	iron-containing alcohol dehydrogenase
MSMEG_1130	21311.3	4.53542	0.0830961	54.5805	0	0	1926.44	1642.18	1716.2	43014.6	39417.3	40151.1	MSMEG_RS05505	hypothetical protein
MSMEG_0749	157.387	4.53099	0.257981	17.5633	4.70712e-69	4.57082e-68	10.7273	14.4686	13.651	346.943	351.789	206.742	MSMEG_RS03650	SRPBCC family protein
MSMEG_6199	293.944	4.53069	0.170528	26.5687	1.56368e-155	3.47213e-154	25.0303	24.4157	22.9337	633.959	550.139	507.187	MSMEG_RS29910	WhiB family transcriptional regulator
MSMEG_2055	126.038	4.52933	0.239381	18.921	7.6639e-80	8.47982e-79	9.38637	9.49499	12.5589	261.784	241.387	221.615	MSMEG_RS09975	NADH-quinone oxidoreductase subunit NuoI
MSMEG_2634	82.4703	4.52689	0.286864	15.7806	4.23042e-56	3.41902e-55	7.59849	6.32999	6.55247	164.009	149.698	160.634	MSMEG_RS12780	ABC transporter substrate-binding protein
MSMEG_6791	329.781	4.52586	0.163341	27.708	5.58902e-169	1.38259e-167	26.3712	28.485	26.7559	715.964	602.533	578.58	MSMEG_RS32735	3-hydroxyacyl-CoA dehydrogenase family protein
MSMEG_2054	93.206	4.50353	0.275808	16.3285	6.18863e-60	5.33995e-59	9.38637	4.97357	9.28267	192.396	172.152	171.045	MSMEG_RS09970	NADH-quinone oxidoreductase subunit J
MSMEG_5649	156.299	4.44908	0.224002	19.8618	8.71594e-88	1.07397e-86	17.4318	12.2078	11.4668	252.322	342.433	301.932	MSMEG_RS27225	AMP-binding protein
MSMEG_2063	51.956	4.42254	0.354242	12.4845	9.07186e-36	5.12785e-35	4.4697	5.87785	3.27624	104.083	104.788	89.2411	MSMEG_RS10015	NADH-quinone oxidoreductase subunit A
MSMEG_2713	306.817	4.41503	0.159285	27.7178	4.26659e-169	1.06354e-167	29.0531	25.32	27.848	602.419	611.889	544.371	MSMEG_RS13155	hydrogenase maturation protease
MSMEG_2712	201.744	4.39875	0.188639	23.3184	2.88746e-120	4.76798e-119	18.3258	17.6336	19.1114	359.559	421.025	374.813	MSMEG_RS13150	HypC/HybG/HupF family hydrogenase formation chaperone
MSMEG_2703	98.4229	4.38733	0.26495	16.5591	1.37642e-61	1.21671e-60	11.1743	8.13856	7.09851	208.166	190.864	165.096	MSMEG_RS13110	HypC/HybG/HupF family hydrogenase formation chaperone
MSMEG_0746	1343.17	4.37758	0.130155	33.6335	5.4339e-248	2.28084e-246	149.735	108.966	109.754	2826.01	2513.05	2351.5	MSMEG_RS03635	carbon-monoxide dehydrogenase large subunit
MSMEG_0745	277.771	4.34124	0.173984	24.9519	2.03697e-137	3.95598e-136	28.1591	26.2243	22.9337	602.419	525.813	461.079	MSMEG_RS03630	(2Fe-2S)-binding protein
MSMEG_6426	717.701	4.32971	0.136819	31.6455	8.75354e-220	3.16392e-218	78.2198	70.9863	53.5119	1428.77	1227.52	1447.19	MSMEG_RS31005	hypothetical protein
MSMEG_1181	1392.5	4.31606	0.116772	36.9614	4.77453e-299	2.46532e-297	119.341	136.999	142.516	3021.56	2477.5	2457.11	MSMEG_RS05755	formimidoylglutamate deiminase
MSMEG_5392	168.468	4.30342	0.200896	21.4211	8.48751e-102	1.20043e-100	18.7727	16.2771	13.1049	337.481	306.88	318.293	MSMEG_RS25980	potassium-transporting ATPase subunit KdpA
MSMEG_1180	1496.3	4.29287	0.100811	42.5834	0	0	141.69	159.606	133.234	2920.63	2960.27	2662.36	MSMEG_RS05750	allantoate amidohydrolase
MSMEG_2719	2606	4.28555	0.1043	41.0888	0	0	291.425	244.609	224.968	5096.91	5127.14	4650.95	MSMEG_RS13180	nickel-dependent hydrogenase large subunit
MSMEG_6238	2650.11	4.27822	0.0783423	54.6094	0	0	267.288	262.243	248.994	5033.82	5145.86	4942.47	MSMEG_RS30090	two-component system sensor histidine kinase MnoS
MSMEG_4207	20.7182	4.27238	0.533705	8.00514	1.19331e-15	3.74154e-15	2.68182	2.26071	1.09208	34.6943	44.9093	38.6712	MSMEG_RS20360	universal stress protein
MSMEG_2716	280.501	4.269	0.159209	26.8138	2.23331e-158	5.04512e-157	28.6061	26.2243	28.3941	526.722	510.843	562.219	MSMEG_RS13165	hypothetical protein
MSMEG_1138	50.4357	4.26536	0.356705	11.9577	5.92024e-33	3.12893e-32	2.68182	7.23428	4.91435	107.237	89.8186	90.7285	MSMEG_RS05545	Zn-dependent alcohol dehydrogenase
MSMEG_6695	277.754	4.26363	0.16066	26.5383	3.50614e-155	7.75882e-154	27.2652	23.9635	31.6703	536.184	516.457	530.985	MSMEG_RS32280	cytochrome P450
MSMEG_5651	463.712	4.25912	0.138183	30.8223	1.31697e-208	4.30562e-207	51.8485	39.3364	47.5054	813.739	929.996	899.848	MSMEG_RS27235	GAF domain-containing protein
MSMEG_1498	4215.16	4.24604	0.0877756	48.3739	0	0	455.016	412.806	396.425	8575.8	7563.47	7887.43	MSMEG_RS07320	CoA-acylating methylmalonate-semialdehyde dehydrogenase
MSMEG_6535	2677.08	4.24473	0.0970284	43.7473	0	0	299.917	259.982	242.988	5393.38	5013	4853.23	MSMEG_RS31515	elongation factor G-like protein EF-G2
MSMEG_1179	2228.42	4.2425	0.0844419	50.2417	0	0	227.508	227.88	214.594	4270.55	4399.24	4030.72	MSMEG_RS05745	urocanate hydratase
MSMEG_4710	4604.4	4.2413	0.0765224	55.4256	0	0	454.122	439.482	494.712	8878.58	8826.55	8532.94	MSMEG_RS22725	2-oxo acid dehydrogenase subunit E2
MSMEG_0453	92.5308	4.23323	0.267798	15.8075	2.76066e-56	2.23951e-55	10.7273	9.04285	7.64455	205.012	174.023	148.735	MSMEG_RS02210	gluconokinase
MSMEG_4711	5322.65	4.1984	0.0837845	50.1095	0	0	550.22	526.746	572.249	10670.1	10338.5	9278.1	MSMEG_RS22730	alpha-ketoacid dehydrogenase subunit beta
MSMEG_4575	595.476	4.17267	0.124756	33.4467	2.86994e-245	1.18929e-243	60.7879	61.4914	64.9787	1195.38	1171.38	1018.84	MSMEG_RS22095	hypothetical protein
MSMEG_2715	577.639	4.1712	0.139575	29.885	3.08678e-196	9.34073e-195	72.4092	56.9699	51.8737	1103.91	1190.1	990.576	MSMEG_RS13160	hypothetical protein
MSMEG_6692	120.673	4.16046	0.231468	17.9743	3.099e-72	3.10186e-71	14.75	13.1121	10.3747	220.782	207.705	257.312	MSMEG_RS32265	amino acid ABC transporter substrate-binding protein
MSMEG_4210	84.1429	4.15891	0.270983	15.3475	3.6823e-53	2.83851e-52	10.7273	7.68642	8.19059	157.701	177.766	142.786	MSMEG_RS20375	tripartite tricarboxylate transporter substrate binding protein
MSMEG_3701	1252.54	4.15693	0.0959758	43.3123	0	0	134.985	139.712	123.951	2321.36	2312.83	2482.39	MSMEG_RS17960	hypothetical protein
MSMEG_RS17965	11727.7	4.13126	0.0660182	62.5777	0	0	1269.84	1314.83	1212.75	22176	22503.3	21889.4	MSMEG_RS17965	hypothetical protein
MSMEG_1497	3081.84	4.08511	0.0916199	44.5876	0	0	346.849	374.374	305.782	6033.65	5568.75	5861.65	MSMEG_RS07315	acyl-CoA dehydrogenase family protein
MSMEG_1177	266.683	4.0731	0.184385	22.0902	3.92309e-108	5.93572e-107	33.9697	35.7192	19.1114	482.566	555.752	472.978	MSMEG_RS05735	cytosine permease
MSMEG_1370	46.9256	4.06108	0.355978	11.4082	3.80375e-30	1.86069e-29	6.25758	4.52142	5.46039	63.0805	108.531	93.7032	MSMEG_RS06690	zinc-dependent alcohol dehydrogenase family protein
MSMEG_0747	203.001	4.06076	0.185729	21.8639	5.72922e-106	8.49073e-105	24.5834	22.6071	20.7495	444.718	342.433	362.914	MSMEG_RS03640	XdhC family protein
MSMEG_4712	6143.44	4.06024	0.0877157	46.2886	0	0	686.099	647.92	750.804	12196.6	11867.3	10711.9	MSMEG_RS22735	pyruvate dehydrogenase (acetyl-transferring) E1 component subunit alpha
MSMEG_3328	1923.85	4.0374	0.106458	37.9248	0	0	240.917	217.028	202.581	4056.08	3340.13	3486.35	MSMEG_RS16160	hypothetical protein
MSMEG_2635	61.872	4.03354	0.310759	12.9796	1.59611e-38	9.61508e-38	7.59849	4.52142	9.28267	129.315	117.887	102.627	MSMEG_RS12785	ABC transporter permease
MSMEG_2486	430.016	4.02133	0.13858	29.0182	3.87317e-185	1.07229e-183	49.6137	51.5442	47.5054	905.205	726.033	800.195	MSMEG_RS12055	MFS transporter
MSMEG_1371	37.4766	4.00984	0.385747	10.395	2.61326e-25	1.11561e-24	4.4697	5.87785	2.7302	59.9265	80.4625	71.3929	MSMEG_RS06695	class I mannose-6-phosphate isomerase
MSMEG_5337	92.816	3.98065	0.24865	16.009	1.10494e-57	9.13435e-57	11.6212	12.66	8.73663	170.317	164.667	188.894	MSMEG_RS25720	zinc ribbon domain-containing protein
MSMEG_6242	178817	3.95704	0.117169	33.772	5.0798e-250	2.14605e-248	25530.9	21621	17750.1	340329	342289	325379	MSMEG_RS30110	NDMA-dependent methanol dehydrogenase
MSMEG_3564	965.086	3.95543	0.111231	35.5606	5.69134e-277	2.64485e-275	117.553	125.243	105.932	2002.81	1712.17	1726.82	MSMEG_RS17315	bacterioferritin
MSMEG_6240	30346.7	3.94004	0.0876747	44.9393	0	0	3995.02	3857.68	3283.34	55044.1	57586.8	58313.1	MSMEG_RS30100	VWA domain-containing protein
MSMEG_1129	14984.1	3.91463	0.0915461	42.7613	0	0	2006.9	1884.08	1697.09	30685.5	27175.7	26455.5	MSMEG_RS05490	FAD-binding oxidoreductase
MSMEG_1600	27736.7	3.91053	0.0734566	53.2359	0	0	3590.06	3493.7	3290.43	54621.4	52336.2	49088.6	MSMEG_RS07815	hypothetical protein
MSMEG_3326	1165.85	3.88511	0.0971252	40.001	0	0	152.864	146.042	143.062	2346.6	2075.18	2131.38	MSMEG_RS16145	glutamate--cysteine ligase
MSMEG_6536	44.0472	3.87848	0.34536	11.2303	2.89591e-29	1.37826e-28	4.91667	4.97357	7.09851	82.0047	87.9473	77.3423	MSMEG_RS31520	carboxymuconolactone decarboxylase family protein
MSMEG_2702	299.364	3.86988	0.144095	26.8566	7.07103e-159	1.60293e-157	36.6516	39.7885	38.7688	548.8	566.98	565.194	MSMEG_RS13105	hydrogenase formation protein HypD
MSMEG_2053	75.4865	3.84707	0.27564	13.9569	2.85767e-44	1.91276e-43	12.9621	9.94713	6.00643	141.931	149.698	132.374	MSMEG_RS09965	NADH-quinone oxidoreductase subunit NuoK
MSMEG_5335	873.218	3.82312	0.102555	37.2786	3.6427e-304	1.92678e-302	105.485	122.078	119.037	1583.32	1624.22	1685.17	MSMEG_RS25710	acetamidase/formamidase family protein
MSMEG_2718	396.837	3.8073	0.135907	28.0141	1.09408e-172	2.82463e-171	58.5531	50.1878	49.6896	722.272	802.753	697.568	MSMEG_RS13175	NifU family protein
MSMEG_1182	1050.83	3.79328	0.101694	37.3008	1.59239e-304	8.49187e-303	139.008	139.26	145.246	2046.96	2045.24	1789.28	MSMEG_RS05760	imidazolonepropionase
MSMEG_0241	7388.51	3.79296	0.0647797	58.5517	0	0	968.584	992	1022.73	13988.1	13731	13628.6	MSMEG_RS01185	MMPL family transporter
MSMEG_1373	58.3195	3.78722	0.297055	12.7492	3.14796e-37	1.84178e-36	8.9394	7.68642	7.09851	100.929	104.788	120.476	MSMEG_RS06705	ABC transporter permease
MSMEG_5019	271.216	3.77486	0.150937	25.0094	4.82816e-138	9.46144e-137	40.6743	36.6235	32.7624	520.414	508.972	487.851	MSMEG_RS24200	GAF domain-containing protein
MSMEG_1358	479.143	3.76662	0.13552	27.7938	5.15186e-170	1.29413e-168	62.1289	62.3956	72.6232	883.127	997.36	797.221	MSMEG_RS06635	hypothetical protein
MSMEG_1599	24161.1	3.76419	0.0660246	57.0119	0	0	3445.69	3257.23	3233.1	46294.8	45367.7	43368.2	MSMEG_RS07810	sigma-70 family RNA polymerase sigma factor
MSMEG_0694	1.12744e+06	3.75069	0.0834988	44.9191	0	0	158985	164571	144232	2.27098e+06	2.02461e+06	2.00124e+06	MSMEG_RS03385	IniB N-terminal domain-containing protein
MSMEG_1789	7348.01	3.73663	0.089585	41.7105	0	0	1057.08	1007.37	1010.72	14805	12148	14059.9	MSMEG_RS08695	hypothetical protein
MSMEG_0418	210.619	3.72399	0.171303	21.7391	8.75348e-105	1.28556e-103	25.0303	30.7457	33.3084	397.407	417.282	359.939	MSMEG_RS02050	fumarate reductase/succinate dehydrogenase flavoprotein subunit
MSMEG_4208	81.7347	3.72373	0.257107	14.4832	1.5476e-47	1.09323e-46	9.38637	10.3993	15.2891	141.931	164.667	148.735	MSMEG_RS20365	tripartite tricarboxylate transporter permease
MSMEG_0242	6269.93	3.71781	0.0670105	55.481	0	0	877.849	921.918	856.736	11644.7	11584.7	11733.7	MSMEG_RS01190	hemophore
MSMEG_6241	95471.5	3.70126	0.0957477	38.6564	0	0	15174.6	13855.4	11862.2	183760	176812	171365	MSMEG_RS30105	MoxR family ATPase
MSMEG_0530	16821	3.70096	0.0724879	51.0563	0	0	2583.04	2295.07	2327.22	31707.4	31189.5	30823.9	MSMEG_RS02575	SDR family oxidoreductase
MSMEG_0417	64.5241	3.69156	0.315619	11.6963	1.33176e-31	6.76381e-31	10.7273	4.06928	13.1049	138.777	110.402	110.064	MSMEG_RS02045	succinate dehydrogenase/fumarate reductase iron-sulfur subunit
MSMEG_5405	310.527	3.69011	0.14645	25.197	4.31806e-140	8.59122e-139	37.0985	47.4749	50.2356	555.109	593.177	580.067	MSMEG_RS26045	winged helix-turn-helix transcriptional regulator
MSMEG_2720	3541.27	3.68152	0.100906	36.4845	1.95101e-291	9.54379e-290	564.97	505.043	463.587	7181.72	6517.46	6014.85	MSMEG_RS13185	hydrogenase expression protein HypE
MSMEG_0853	40.1058	3.67263	0.384198	9.55921	1.18657e-21	4.58968e-21	8.49243	2.71285	6.00643	88.3127	78.5912	56.5194	MSMEG_RS04160	hypothetical protein
MSMEG_5434	553.844	3.67192	0.12529	29.3074	8.35885e-189	2.4278e-187	86.2652	70.5342	85.1822	1012.44	1115.25	953.393	MSMEG_RS26180	hypothetical protein
MSMEG_RS16150	1585.68	3.66551	0.104322	35.1364	1.87392e-270	8.58573e-269	237.788	231.497	223.33	3330.65	2818.06	2672.77	MSMEG_RS16150	hypothetical protein
MSMEG_3544	6025.49	3.66367	0.0858233	42.6886	0	0	794.713	932.77	916.254	11751.9	10920.4	10836.8	MSMEG_RS17215	TIGR03854 family LLM class F420-dependent oxidoreductase
MSMEG_2050	129.657	3.64431	0.208319	17.4939	1.59493e-68	1.53956e-67	18.7727	16.2771	22.3876	264.938	241.387	214.179	MSMEG_RS09950	NADH-quinone oxidoreductase subunit NuoN
MSMEG_0358	3462.25	3.64348	0.088761	41.0482	0	0	552.455	529.007	455.397	6607.68	6343.44	6285.55	MSMEG_RS01765	R2-like ligand-binding oxidase
MSMEG_4075	166.666	3.6413	0.213877	17.0253	5.33581e-65	4.90321e-64	20.5606	31.1978	21.8416	321.711	359.274	245.413	MSMEG_RS19720	acetate--CoA ligase family protein
MSMEG_0744	408.28	3.64091	0.148911	24.4502	5.00932e-132	9.07817e-131	62.5758	60.1349	58.9723	719.118	894.443	654.435	MSMEG_RS03625	xanthine dehydrogenase family protein subunit M
MSMEG_2633	55.088	3.63903	0.307135	11.8483	2.1955e-32	1.13545e-31	9.38637	5.87785	9.28267	104.083	114.144	87.7538	MSMEG_RS12775	ABC transporter ATP-binding protein
MSMEG_3614	262.549	3.62948	0.154695	23.4621	9.94828e-122	1.66384e-120	45.591	33.9107	37.6767	510.952	477.161	470.003	MSMEG_RS17540	hypothetical protein
MSMEG_0279	292.49	3.59599	0.145158	24.7729	1.75698e-135	3.32294e-134	42.4622	47.9271	43.6832	545.646	499.616	575.605	MSMEG_RS01370	APC family permease
MSMEG_2458	1581.19	3.57842	0.114355	31.2921	5.97053e-215	2.04443e-213	268.182	254.556	208.587	3043.63	2606.61	3105.59	MSMEG_RS11920	ABC transporter substrate-binding protein
MSMEG_RS16155	2371.56	3.57537	0.0893915	39.9967	0	0	371.879	353.575	374.037	4787.81	4260.77	4081.29	MSMEG_RS16155	hypothetical protein
MSMEG_5393	209.377	3.56533	0.162454	21.9468	9.29999e-107	1.38775e-105	29.5	34.815	33.3084	400.561	389.214	368.863	MSMEG_RS25985	potassium-transporting ATPase subunit KdpB
MSMEG_3008	591.328	3.55131	0.128612	27.6126	7.85314e-168	1.91358e-166	100.121	93.5935	82.998	1220.61	1092.79	957.855	MSMEG_RS14610	sigma 54 type regulator
MSMEG_2194	2825.71	3.5489	0.337776	10.5067	8.04923e-26	3.48889e-25	646.766	373.922	313.427	5642.55	5215.09	4762.5	MSMEG_RS10640	MerR family transcriptional regulator
MSMEG_2460	449.742	3.54196	0.143902	24.6137	9.01887e-134	1.68128e-132	83.5834	70.9863	58.4262	797.968	765.329	922.158	MSMEG_RS11930	ABC transporter permease
MSMEG_0131	632.41	3.53627	0.110693	31.9466	6.02645e-224	2.21515e-222	103.697	90.4285	108.116	1119.68	1190.1	1182.44	MSMEG_RS00645	fatty-acid--CoA ligase FadD5
MSMEG_2457	225.164	3.52833	0.170065	20.747	1.30547e-95	1.74045e-94	37.0985	42.0492	28.3941	394.253	391.085	458.104	MSMEG_RS11915	hypothetical protein
MSMEG_2273	5724.81	3.52595	0.0856879	41.1488	0	0	985.122	859.523	897.143	11313.5	9969.86	10323.7	MSMEG_RS11010	carbamoyltransferase HypF
MSMEG_2456	1853.16	3.52018	0.100236	35.1189	3.47518e-270	1.57011e-268	316.902	316.047	256.092	3589.28	3289.6	3351	MSMEG_RS11910	LLM class flavin-dependent oxidoreductase
MSMEG_5950	79.431	3.51556	0.250449	14.037	9.2532e-45	6.21914e-44	15.644	11.7557	10.9208	138.777	140.342	159.147	MSMEG_RS28680	colanic acid biosynthesis acetyltransferase
MSMEG_4397	32.049	3.50922	0.383083	9.16048	5.16686e-20	1.90133e-19	6.25758	4.06928	5.46039	50.4644	56.1366	69.9055	MSMEG_RS21270	MerR family transcriptional regulator
MSMEG_4074	106.914	3.49345	0.226177	15.4457	8.07076e-54	6.3111e-53	18.3258	18.99	14.7431	205.012	162.796	221.615	MSMEG_RS19715	SDR family oxidoreductase
MSMEG_1183	1156.82	3.47743	0.0971991	35.7763	2.57883e-280	1.22466e-278	188.174	202.108	179.647	2239.36	2159.39	1972.23	MSMEG_RS05765	histidine ammonia-lyase
MSMEG_1790	13044.3	3.47332	0.0942119	36.8671	1.55451e-297	7.96352e-296	2071.26	2033.28	2359.98	26169	21810.9	23821.4	MSMEG_RS08700	Rho termination factor N-terminal domain-containing protein
MSMEG_5972	47.1074	3.46267	0.323498	10.7038	9.76617e-27	4.36392e-26	7.15152	6.78213	9.28267	107.237	74.8488	77.3423	MSMEG_RS28790	hypothetical protein
MSMEG_2459	916.171	3.45421	0.119477	28.9111	8.66706e-184	2.36924e-182	176.106	151.016	131.049	1750.48	1536.27	1752.1	MSMEG_RS11925	ABC transporter ATP-binding protein
MSMEG_6026	56.5613	3.44396	0.304026	11.3278	9.55547e-30	4.61872e-29	8.49243	13.1121	6.55247	104.083	117.887	89.2411	MSMEG_RS29055	3-hydroxybutyrate dehydrogenase
MSMEG_6399	23388.5	3.4247	0.0699609	48.9515	0	0	4098.27	3975.24	3878.52	45380.1	41988.3	41010.8	MSMEG_RS30865	esterase family protein
MSMEG_0415	16622.1	3.41558	0.0962248	35.4959	5.69426e-276	2.62744e-274	2564.71	2749.93	3232.01	31180.7	31298	28707.4	MSMEG_RS02040	flavin reductase family protein
MSMEG_1178	1077.39	3.39592	0.136874	24.8106	6.88119e-136	1.31287e-134	228.402	161.867	168.726	2182.59	1957.3	1765.49	MSMEG_RS05740	MurR/RpiR family transcriptional regulator
MSMEG_0889	2690.32	3.39436	0.0812015	41.8017	0	0	463.955	445.812	491.435	5134.75	4954.99	4650.95	MSMEG_RS04335	aldehyde dehydrogenase family protein
MSMEG_2535	147.968	3.3918	0.197666	17.1592	5.3613e-66	4.98295e-65	25.0303	30.2935	22.3876	236.552	258.228	315.319	MSMEG_RS12295	SDR family oxidoreductase
MSMEG_6124	31.45	3.38987	0.380462	8.90989	5.10809e-19	1.81702e-18	4.02273	5.87785	6.55247	59.9265	61.7503	50.57	MSMEG_RS29545	peptide ABC transporter substrate-binding protein
MSMEG_6123	17.022	3.3886	0.514958	6.58034	4.69372e-11	1.2176e-10	4.4697	1.80857	2.7302	25.2322	33.682	34.2091	MSMEG_RS29540	ABC transporter permease
MSMEG_3616	2616.53	3.38728	0.0997956	33.9421	1.59299e-252	6.77384e-251	510.44	460.733	396.425	4822.51	4925.05	4584.02	MSMEG_RS17550	GlsB/YeaQ/YmgE family stress response membrane protein
MSMEG_3729	95.6218	3.37908	0.226731	14.9035	3.12926e-50	2.31615e-49	14.75	17.6336	17.4733	195.55	172.152	156.172	MSMEG_RS18080	catalase/peroxidase HPI
MSMEG_6701	278.247	3.36999	0.162507	20.7375	1.59131e-95	2.11719e-94	49.1667	60.5871	36.5846	507.798	497.745	517.599	MSMEG_RS32305	amino acid permease
MSMEG_2461	318.006	3.36789	0.160187	21.0248	3.8935e-98	5.28833e-97	69.2804	54.2571	43.6832	618.189	527.684	594.941	MSMEG_RS11935	ABC transporter permease subunit
MSMEG_5394	68.0943	3.3665	0.311947	10.7919	3.76062e-27	1.69202e-26	14.303	15.3728	5.46039	154.547	95.4322	123.45	MSMEG_RS25990	potassium-transporting ATPase subunit C
MSMEG_1788	6166.78	3.34429	0.10675	31.3284	1.91633e-215	6.63173e-214	1251.96	1031.34	1031.47	12174.5	9975.47	11535.9	MSMEG_RS08690	hypothetical protein
MSMEG_0416	7094.25	3.34266	0.103596	32.2664	2.0703e-228	7.74102e-227	1241.68	1200.89	1375.47	14688.3	11468.7	12590.4	MSMEG_RS33465	hypothetical protein
MSMEG_2490	404.21	3.34094	0.136011	24.5637	3.08866e-133	5.69259e-132	71.0683	80.0292	66.0708	772.736	645.571	789.784	MSMEG_RS12075	aspartate/glutamate racemase family protein
MSMEG_0658	71.0557	3.34071	0.252296	13.2412	5.07126e-40	3.14824e-39	12.5152	12.2078	13.651	132.469	121.629	133.862	MSMEG_RS03205	ABC transporter permease
MSMEG_5962	211.738	3.33589	0.166592	20.0244	3.37785e-89	4.21809e-88	42.9091	38.4321	32.7624	391.099	344.304	420.921	MSMEG_RS28740	polysaccharide deacetylase family protein
MSMEG_4048	178.076	3.33338	0.169501	19.6659	4.22735e-86	5.05572e-85	34.8637	28.0328	33.8544	318.557	319.979	333.167	MSMEG_RS19610	cyclase family protein
MSMEG_3730	188.358	3.32174	0.1677	19.8076	2.56123e-87	3.12048e-86	29.5	37.98	34.9465	359.559	342.433	325.73	MSMEG_RS18085	DNA-binding protein
MSMEG_3545	19499.7	3.31906	0.0625958	53.0237	0	0	3611.97	3568.31	3472.81	36712.9	34767.3	34865	MSMEG_RS17220	hypothetical protein
MSMEG_5963	1026.61	3.31536	0.0999546	33.1686	3.054e-241	1.2265e-239	202.924	179.5	178.009	1999.65	1762.69	1836.88	MSMEG_RS28745	GNAT family N-acetyltransferase
MSMEG_0573	29.4744	3.30585	0.41019	8.05932	7.67192e-16	2.42181e-15	3.12879	5.87785	7.09851	69.3886	39.2956	52.0573	MSMEG_RS02790	sigma-70 family RNA polymerase sigma factor
MSMEG_3095	121.358	3.29597	0.199062	16.5575	1.41346e-61	1.24776e-60	25.9243	20.3464	20.7495	223.936	217.062	220.128	MSMEG_RS15035	substrate-binding domain-containing protein
MSMEG_1232	66.2441	3.28817	0.301563	10.9038	1.1059e-27	5.05622e-27	8.9394	15.825	11.4668	145.085	132.857	83.2917	MSMEG_RS06020	ABC transporter substrate-binding protein
MSMEG_1974	23.6988	3.28474	0.426681	7.69836	1.37823e-14	4.14362e-14	4.02273	4.52142	4.91435	34.6943	52.3942	41.6459	MSMEG_RS09580	MmoB/DmpM family protein
MSMEG_4169	30.1553	3.28473	0.397953	8.25407	1.53088e-16	4.9725e-16	3.57576	7.23428	6.00643	53.6184	67.3639	43.1332	MSMEG_RS20170	SDR family oxidoreductase
MSMEG_1710	20.6942	3.27528	0.467807	7.00134	2.53532e-12	6.98044e-12	3.57576	5.42571	2.7302	31.5403	31.8107	49.0826	MSMEG_RS08345	ABC transporter permease
MSMEG_3330	1110.34	3.27484	0.122649	26.701	4.58417e-157	1.02843e-155	236.894	198.038	186.199	2283.51	1959.17	1798.21	MSMEG_RS16170	CsbD family protein
MSMEG_2489	314.763	3.27416	0.13636	24.0112	2.12641e-127	3.71893e-126	57.2122	64.6564	54.0579	605.573	538.911	568.168	MSMEG_RS12070	GntR family transcriptional regulator
MSMEG_4384	4726.85	3.27144	0.0849604	38.5054	0	0	896.622	851.384	911.886	9064.67	8869.58	7766.95	MSMEG_RS21210	transglycosylase/D,D-transpeptidase PonA2
MSMEG_3329	1305.57	3.26932	0.128904	25.3623	6.57161e-142	1.31554e-140	289.19	232.401	211.863	2693.54	2223.01	2183.43	MSMEG_RS16165	hypothetical protein
MSMEG_3093	130.13	3.2612	0.2078	15.6939	1.664e-55	1.33819e-54	24.5834	28.9371	19.6574	252.322	196.478	258.799	MSMEG_RS15025	sugar kinase
MSMEG_5139	72.4631	3.25949	0.283858	11.4828	1.6092e-30	7.93744e-30	16.0909	11.3036	13.1049	148.239	155.311	90.7285	MSMEG_RS24780	nitrate reductase subunit beta
MSMEG_0092	1080.53	3.23909	0.129685	24.9766	1.09722e-137	2.13728e-136	255.667	184.474	179.647	1961.8	2009.69	1891.91	MSMEG_RS00455	TetR/AcrR family transcriptional regulator
MSMEG_4203	31.8457	3.23152	0.399403	8.09088	5.92345e-16	1.87533e-15	7.59849	6.32999	4.36832	47.3104	82.3337	43.1332	MSMEG_RS20340	S8 family peptidase
MSMEG_4656	507.428	3.21775	0.131999	24.377	2.99691e-131	5.41609e-130	110.849	99.4713	82.998	993.518	933.739	823.993	MSMEG_RS22465	sugar ABC transporter ATP-binding protein
MSMEG_6118	8.8189	3.21055	0.690065	4.65254	3.27877e-06	6.51747e-06	2.68182	0.904285	1.63812	12.6161	18.7122	16.3609	MSMEG_RS29515	IclR family transcriptional regulator
MSMEG_0414	1344.89	3.20469	0.0855869	37.4437	7.60421e-307	4.15739e-305	248.962	263.599	277.934	2434.91	2376.45	2467.52	MSMEG_RS02035	isopenicillin N synthase family oxygenase
MSMEG_0695	28585.3	3.18822	0.0749805	42.5207	0	0	5619.76	6020.27	5313.51	53921.2	49954.1	50683	MSMEG_RS03390	isoniazid-induced protein IniA
MSMEG_2996	13.3235	3.18481	0.581167	5.48003	4.25251e-08	9.41048e-08	4.4697	1.80857	1.63812	22.0782	18.7122	31.2344	MSMEG_RS14550	LLM class flavin-dependent oxidoreductase
MSMEG_5339	1756.67	3.18373	0.0871154	36.5461	2.0528e-292	1.01951e-290	349.978	373.017	321.071	3113.02	3287.73	3095.18	MSMEG_RS25730	substrate-binding domain-containing protein
MSMEG_0699	33949.1	3.18315	0.0649326	49.0224	0	0	6928.93	6706.17	6565.03	62005	62936.6	58552.6	MSMEG_RS03410	Hsp70 family protein
MSMEG_6021	124.654	3.18223	0.198138	16.0607	4.81301e-58	4.00428e-57	28.6061	25.7721	19.6574	211.32	232.031	230.54	MSMEG_RS29030	xylose isomerase
MSMEG_5957	91.9981	3.16724	0.22319	14.1907	1.04552e-45	7.1152e-45	20.1137	19.8943	14.7431	173.471	157.182	166.583	MSMEG_RS28715	nucleotide sugar dehydrogenase
MSMEG_3162	1217.05	3.15985	0.0997045	31.6922	1.99108e-220	7.27749e-219	256.561	264.051	212.409	2226.74	2172.49	2170.05	MSMEG_RS15355	serine hydrolase
MSMEG_3615	2272.49	3.15888	0.0750501	42.0903	0	0	476.917	454.855	440.108	4125.47	4039.96	4097.65	MSMEG_RS17545	zinc-binding alcohol dehydrogenase family protein
MSMEG_4047	128.695	3.15269	0.201459	15.6493	3.36027e-55	2.68244e-54	27.2652	23.9635	25.6639	274.4	224.546	196.33	MSMEG_RS19605	MBL fold metallo-hydrolase
MSMEG_3636	497.763	3.14531	0.111487	28.2123	4.13177e-175	1.07957e-173	104.144	103.088	95.5569	886.281	931.868	865.639	MSMEG_RS17650	iron ABC transporter substrate-binding protein
MSMEG_5131	960.253	3.14291	0.100042	31.4158	1.23062e-216	4.30453e-215	206.5	200.751	176.371	1835.64	1646.67	1695.58	MSMEG_RS24750	hypothetical protein
MSMEG_5022	211.27	3.12672	0.157979	19.792	3.49009e-87	4.24421e-86	42.4622	47.0228	39.8609	394.253	400.441	343.578	MSMEG_RS24215	NAD(P)/FAD-dependent oxidoreductase
MSMEG_1230	1.54802	3.121	1.67211	1.86651	0.0619707	0.0820475	0	0.904285	0	3.15403	3.74244	1.48735	MSMEG_RS06010	DUF202 domain-containing protein
MSMEG_5955	132.629	3.11615	0.232305	13.4141	5.00123e-41	3.15597e-40	37.0985	25.32	19.1114	258.63	190.864	264.749	MSMEG_RS28705	protein tyrosine kinase
MSMEG_2463	226.745	3.10251	0.22092	14.0436	8.43355e-45	5.67411e-44	69.2804	37.0757	35.4926	350.097	449.093	419.433	MSMEG_RS11945	FAD binding domain-containing protein
MSMEG_2548	10.4437	3.10073	0.624368	4.96619	6.82803e-07	1.41385e-06	2.68182	1.35643	2.7302	12.6161	22.4546	20.8229	MSMEG_RS12360	SDR family oxidoreductase
MSMEG_5866	610.731	3.0869	0.142012	21.7369	9.18555e-105	1.34597e-103	152.864	125.243	106.478	1088.14	1221.91	969.754	MSMEG_RS28275	NDMA-dependent alcohol dehydrogenase
MSMEG_4076	180.622	3.086	0.18101	17.0488	3.56764e-65	3.28769e-64	38.4394	44.3099	31.1242	299.632	374.244	295.983	MSMEG_RS19725	acyl-CoA dehydrogenase family protein
MSMEG_2343	1621.34	3.08194	0.10591	29.0997	3.61636e-186	1.00979e-184	303.493	327.351	398.063	2949.01	2834.9	2915.21	MSMEG_RS11340	Rieske (2Fe-2S) protein
MSMEG_2462	677.33	3.06873	0.110345	27.8102	3.26415e-170	8.23124e-169	151.076	146.042	133.78	1312.07	1098.41	1222.6	MSMEG_RS11940	xanthine dehydrogenase family protein
MSMEG_5763	271.126	3.06719	0.150741	20.3474	4.89697e-92	6.33394e-91	59.447	56.0656	56.2421	545.646	495.873	413.484	MSMEG_RS27780	alpha/beta hydrolase
MSMEG_3094	91.5108	3.06696	0.24016	12.7705	2.39743e-37	1.40646e-36	21.4546	22.155	15.2891	141.931	145.955	202.28	MSMEG_RS15030	galactitol-1-phosphate 5-dehydrogenase
MSMEG_5365	0.31187	3.06632	3.49582	0.877138	0.380411	0.432836	0	0	0	0	1.87122	0	MSMEG_RS25855	DNA-directed RNA polymerase sigma-70 factor
MSMEG_5867	280.249	3.0626	0.158977	19.2644	1.06911e-82	1.23327e-81	58.5531	64.6564	54.6039	599.265	421.025	483.389	MSMEG_RS28280	nuclear transport factor 2 family protein
MSMEG_5952	131.16	3.05961	0.217734	14.052	7.48656e-45	5.04219e-44	29.947	33.4585	20.7495	227.09	194.607	281.11	MSMEG_RS28690	SGNH/GDSL hydrolase family protein
MSMEG_2487	450.609	3.04354	0.12083	25.1886	5.33445e-140	1.05811e-138	97.4395	92.237	104.84	722.272	842.049	844.816	MSMEG_RS12060	aminotransferase class III-fold pyridoxal phosphate-dependent enzyme
MSMEG_4458	232.618	3.042	0.159337	19.0916	2.96592e-81	3.36172e-80	49.6137	56.5178	43.1371	473.104	391.085	382.249	MSMEG_RS21540	cytosine permease
MSMEG_4777	1.42006	3.03403	1.80212	1.68359	0.0922601	0.118743	0	0.904285	0	3.15403	0	4.46206	MSMEG_RS23020	OB-fold domain-containing protein
MSMEG_3823	31.4456	3.03309	0.411315	7.37412	1.65439e-13	4.76049e-13	4.91667	9.94713	4.91435	82.0047	39.2956	47.5953	MSMEG_RS18535	SDR family oxidoreductase
MSMEG_0452	138.394	3.02368	0.190377	15.8826	8.3683e-57	6.83113e-56	30.8409	34.815	25.1178	242.86	224.546	272.185	MSMEG_RS02205	GntP family permease
MSMEG_1351	357.089	3.02347	0.123471	24.4873	2.01847e-132	3.6992e-131	82.6895	76.4121	75.3534	640.267	611.889	655.922	MSMEG_RS06595	cyclopropane-fatty-acyl-phospholipid synthase
MSMEG_RS13670	201.059	3.02165	0.165807	18.2239	3.33792e-74	3.41455e-73	50.9546	37.0757	44.2292	365.867	327.464	380.762	MSMEG_RS13670	hypothetical protein
MSMEG_4460	234.33	3.01986	0.154815	19.5062	9.72393e-85	1.15025e-83	51.4016	51.9964	49.1435	485.72	385.471	382.249	MSMEG_RS21550	thiamine pyrophosphate-binding protein
MSMEG_1972	35.1632	3.01873	0.364964	8.27132	1.32488e-16	4.30984e-16	8.04546	4.97357	10.9208	44.1564	72.9776	69.9055	MSMEG_RS09570	2Fe-2S iron-sulfur cluster binding domain-containing protein
MSMEG_1764	2598.44	3.01611	0.0955839	31.5546	1.55052e-218	5.48243e-217	537.258	589.141	586.992	4923.43	4850.2	4103.6	MSMEG_RS08575	L-lysine 6-transaminase
MSMEG_5954	116.107	3.01449	0.218351	13.8057	2.35415e-43	1.55651e-42	25.0303	21.2507	29.4861	258.63	185.251	176.995	MSMEG_RS28700	cell shape-determining protein
MSMEG_0679	21687.8	3.00623	0.0656202	45.8125	0	0	4673.97	4804.46	4924.73	38709.4	40025.4	36989	MSMEG_RS03310	hypothetical protein
MSMEG_1496	1801.95	3.00532	0.0952656	31.5468	1.98477e-218	6.97996e-217	418.811	417.327	359.294	3343.27	2962.14	3310.85	MSMEG_RS07310	3-hydroxyisobutyrate dehydrogenase
MSMEG_6702	225.044	3.00491	0.154734	19.4198	5.246e-84	6.11657e-83	56.3182	46.5707	45.3213	438.41	387.343	376.3	MSMEG_RS32310	NAD-dependent succinate-semialdehyde dehydrogenase
MSMEG_0901	1497.37	2.994	0.0973706	30.7485	1.28038e-207	4.10351e-206	341.932	338.202	318.341	2961.63	2580.41	2443.72	MSMEG_RS04395	DUF779 domain-containing protein
MSMEG_5951	145.288	2.99028	0.184316	16.2237	3.42972e-59	2.91683e-58	26.8182	37.5278	33.3084	258.63	243.259	272.185	MSMEG_RS28685	glycosyltransferase
MSMEG_1709	21.5371	2.98527	0.439273	6.79592	1.07621e-11	2.87078e-11	4.91667	5.87785	3.82228	28.3862	50.5229	35.6964	MSMEG_RS08340	ABC transporter permease
MSMEG_6691	48.0823	2.98521	0.301501	9.90116	4.11473e-23	1.66379e-22	8.49243	12.66	10.9208	91.4667	93.561	71.3929	MSMEG_RS32260	gamma-glutamyl-gamma-aminobutyrate hydrolase family protein
MSMEG_5619	13.8789	2.98093	0.677218	4.40173	1.07391e-05	2.05376e-05	1.78788	2.26071	4.91435	50.4644	7.48488	16.3609	MSMEG_RS27080	acyl-CoA dehydrogenase family protein
MSMEG_5046	3060.36	2.98081	0.0683387	43.6182	0	0	695.486	673.692	696.2	5365	5458.35	5473.46	MSMEG_RS24335	MFS transporter
MSMEG_6670	783.652	2.97992	0.106801	27.9015	2.5586e-171	6.55365e-170	198.008	163.676	166.542	1416.16	1326.7	1430.83	MSMEG_RS32155	ABC transporter permease subunit
MSMEG_5992	84.7965	2.97539	0.225433	13.1986	8.94395e-40	5.53657e-39	20.5606	18.99	17.4733	160.855	134.728	156.172	MSMEG_RS28885	bifunctional MaoC family dehydratase/OB-fold nucleic acid binding domain-containing protein
MSMEG_1188	6374.42	2.97338	0.0656038	45.3232	0	0	1400.36	1483.03	1435.54	11430.2	11468.7	11028.7	MSMEG_RS05790	hypothetical protein
MSMEG_3092	61.7023	2.96454	0.273209	10.8508	1.97724e-27	8.97067e-27	18.7727	10.8514	12.0129	116.699	104.788	107.089	MSMEG_RS15020	sugar-binding transcriptional regulator
MSMEG_5292	5372.82	2.96353	0.0807494	36.7003	7.21517e-295	3.66734e-293	1274.31	1215.36	1170.71	9916.26	9889.4	8770.91	MSMEG_RS25510	hypothetical protein
MSMEG_5117	4584.81	2.96162	0.0962204	30.7796	4.91746e-208	1.59169e-206	1146.48	940.004	1040.75	8815.5	7907.78	7658.38	MSMEG_RS24675	proline dehydrogenase family protein
MSMEG_0329	116.328	2.95275	0.229377	12.8729	6.39332e-38	3.80209e-37	25.9243	33.4585	19.1114	249.168	166.539	203.767	MSMEG_RS01620	flavin reductase family protein
MSMEG_5140	227.085	2.94976	0.149165	19.7752	4.87296e-87	5.91483e-86	51.8485	53.8049	49.1435	438.41	400.441	368.863	MSMEG_RS24785	nitrate reductase subunit alpha
MSMEG_2534	177.463	2.94829	0.221321	13.3213	1.73953e-40	1.08821e-39	54.0834	42.0492	24.5718	353.251	284.425	306.395	MSMEG_RS12290	alpha/beta hydrolase
MSMEG_0716	100.219	2.92845	0.213265	13.7315	6.57805e-43	4.31854e-42	21.0076	23.9635	24.0257	208.166	159.054	165.096	MSMEG_RS03495	MFS transporter
MSMEG_5348	20.9969	2.92169	0.433168	6.74493	1.53099e-11	4.06059e-11	5.36364	3.61714	6.00643	31.5403	39.2956	40.1585	MSMEG_RS25775	long-chain fatty acid--CoA ligase
MSMEG_2223	16.3246	2.9208	0.540151	5.40737	6.39586e-08	1.40059e-07	4.91667	3.61714	2.18416	47.3104	20.5834	19.3356	MSMEG_RS10780	enoyl-CoA hydratase/isomerase family protein
MSMEG_5961	296.43	2.9103	0.143106	20.3367	6.09197e-92	7.86396e-91	75.538	75.5078	56.2421	548.8	510.843	511.649	MSMEG_RS28735	glycosyltransferase family 2 protein
MSMEG_3121	23569.6	2.90855	0.0641017	45.3739	0	0	5681.44	5491.27	5449.47	40340	41125.7	43329.5	MSMEG_RS15155	transcriptional regulator
MSMEG_2523	6.10452	2.90315	0.923331	3.14421	0.00166536	0.00267196	0.44697	3.61714	0	15.7701	9.3561	7.43676	MSMEG_RS12240	FtsX-like permease family protein
MSMEG_0167	119.469	2.90186	0.189634	15.3025	7.36174e-53	5.65472e-52	29.947	28.0328	26.7559	205.012	203.963	223.103	MSMEG_RS00825	OFA family MFS transporter
MSMEG_RS25515	270.528	2.90135	0.137143	21.1556	2.45058e-99	3.37072e-98	58.5531	65.1085	68.2549	485.72	454.706	490.826	MSMEG_RS25515	hypothetical protein
MSMEG_6119	6.35017	2.89834	0.794282	3.649	0.000263258	0.000452392	0.89394	1.35643	2.18416	15.7701	7.48488	10.4115	MSMEG_RS29520	sulfite exporter TauE/SafE family protein
MSMEG_5959	207.929	2.88957	0.162674	17.763	1.36791e-70	1.34843e-69	53.6364	42.0492	51.8737	410.023	325.592	364.401	MSMEG_RS28730	GNAT family N-acetyltransferase
MSMEG_5575	76.9763	2.8868	0.244205	11.8212	3.03328e-32	1.56499e-31	21.4546	20.3464	12.5589	141.931	127.243	138.324	MSMEG_RS26870	MarR family transcriptional regulator
MSMEG_2737	485.219	2.88552	0.128744	22.4128	2.95385e-111	4.57565e-110	122.917	117.557	103.747	984.056	770.943	812.094	MSMEG_RS13270	PE-PPE domain-containing protein
MSMEG_5956	481.516	2.88485	0.113086	25.5102	1.51915e-143	3.0983e-142	109.508	122.078	111.392	902.051	836.435	807.632	MSMEG_RS28710	NAD(P)-dependent oxidoreductase
MSMEG_3553	171.716	2.88232	0.173116	16.6496	3.04453e-62	2.71711e-61	47.8258	40.6928	34.9465	271.246	306.88	328.705	MSMEG_RS17260	dihydropyrimidinase
MSMEG_6671	109.156	2.88034	0.196685	14.6445	1.46173e-48	1.0555e-47	26.8182	23.9635	27.848	186.088	198.349	191.868	MSMEG_RS32160	ABC transporter ATP-binding protein
MSMEG_4576	895.525	2.87896	0.111844	25.7409	4.07611e-146	8.41878e-145	202.031	201.655	238.619	1734.71	1424	1572.13	MSMEG_RS22100	slipin family protein
MSMEG_2577	0.650769	2.87731	2.28342	1.26009	0.207638	0.249934	0	0	0.546039	0	1.87122	1.48735	MSMEG_RS12500	hypothetical protein
MSMEG_3331	1423.36	2.87728	0.133683	21.5232	9.43884e-103	1.34374e-101	402.72	330.516	286.671	2885.93	2333.41	2300.93	MSMEG_RS16175	hypothetical protein
MSMEG_5355	3597.81	2.87684	0.0756263	38.0403	0	0	918.524	848.219	817.967	6443.67	6369.63	6188.87	MSMEG_RS25810	hypothetical protein
MSMEG_0051	1016.44	2.87373	0.0962436	29.8589	6.71954e-196	2.02395e-194	236.447	238.731	256.639	1882.95	1641.06	1842.83	MSMEG_RS00245	WhiB family transcriptional regulator
MSMEG_5953	153.106	2.86781	0.177025	16.2	5.0431e-59	4.27776e-58	32.1819	42.5014	35.4926	287.016	250.743	270.698	MSMEG_RS28695	SGNH/GDSL hydrolase family protein
MSMEG_6826	210.886	2.85445	0.150663	18.9459	4.7735e-80	5.2907e-79	50.0607	48.8314	55.696	359.559	355.532	395.636	MSMEG_RS32910	L-lactate permease
MSMEG_5565	147.435	2.83644	0.192652	14.7232	4.57767e-49	3.33508e-48	37.5455	39.3364	30.0322	312.249	217.062	248.388	MSMEG_RS26820	FABP family protein
MSMEG_0755	354.947	2.83575	0.167957	16.8838	5.92429e-64	5.39824e-63	69.7273	77.3163	115.76	637.113	593.177	636.587	MSMEG_RS03680	cation transporter
MSMEG_5628	4.8805	2.83285	0.916669	3.09037	0.00199907	0.00318228	2.23485	1.35643	0	6.30805	7.48488	11.8988	MSMEG_RS27125	SDR family oxidoreductase
MSMEG_0657	425.951	2.82667	0.124669	22.6734	8.2092e-114	1.29634e-112	109.955	98.567	105.386	838.971	675.51	727.315	MSMEG_RS03200	aromatic ring-hydroxylating dioxygenase subunit alpha
MSMEG_5919	54.0497	2.82602	0.282513	10.0031	1.47641e-23	6.04119e-23	12.5152	12.2078	14.7431	113.545	95.4322	75.855	MSMEG_RS28530	acetoacetate decarboxylase family protein
MSMEG_1104	40.183	2.82539	0.311296	9.0762	1.12427e-19	4.10697e-19	8.9394	10.8514	9.82871	75.6966	67.3639	68.4182	MSMEG_RS05375	hypothetical protein
MSMEG_0078	471.467	2.81912	0.124827	22.5841	6.20492e-113	9.70413e-112	128.28	114.392	107.024	886.281	731.647	861.177	MSMEG_RS00385	hypothetical protein
MSMEG_4459	196.522	2.81717	0.172984	16.2857	1.24693e-59	1.07025e-58	37.9925	52.9007	55.15	384.791	318.107	330.192	MSMEG_RS21545	agmatinase
MSMEG_0693	49725.8	2.80964	0.0699522	40.1651	0	0	11563.1	12738.2	12942.2	87066.9	88179.4	85864.8	MSMEG_RS03380	IniB N-terminal domain-containing protein
MSMEG_5119	11902.2	2.80911	0.0990169	28.3699	4.75098e-177	1.26163e-175	3294.17	2628.76	2992.3	22166.5	21159.8	19172	MSMEG_RS24680	L-glutamate gamma-semialdehyde dehydrogenase
MSMEG_0274	2.62267	2.8088	1.26939	2.21271	0.0269177	0.0376293	0.44697	0.452142	1.09208	6.30805	0	7.43676	MSMEG_RS01350	hypothetical protein
MSMEG_4462	171.887	2.80429	0.163853	17.1147	1.15307e-65	1.06864e-64	45.144	40.2407	43.6832	312.249	273.198	316.806	MSMEG_RS21555	sodium:solute symporter
MSMEG_0900	3700.69	2.80197	0.0865944	32.3574	1.09053e-229	4.12499e-228	948.024	925.987	906.425	7162.79	6238.65	6022.29	MSMEG_RS04390	aldehyde dehydrogenase family protein
MSMEG_6381	308.312	2.79482	0.129072	21.6533	5.66335e-104	8.20618e-103	76.8789	78.2206	78.6297	526.722	510.843	578.58	MSMEG_RS30780	alpha/beta hydrolase
MSMEG_3563	595.795	2.77822	0.111661	24.8808	1.20164e-136	2.31298e-135	161.356	135.643	156.713	1094.45	1055.37	971.241	MSMEG_RS17310	MFS transporter
MSMEG_5231	41.9569	2.77462	0.319676	8.67949	3.97548e-18	1.37066e-17	12.9621	12.2078	6.55247	75.6966	65.4927	78.8297	MSMEG_RS25220	hypothetical protein
MSMEG_4046	117.051	2.77399	0.193145	14.3622	8.93395e-47	6.20323e-46	33.0758	25.7721	31.1242	198.704	196.478	217.153	MSMEG_RS19600	CoA transferase
MSMEG_3980	442.526	2.76492	0.150719	18.3448	3.6301e-75	3.79092e-74	136.326	103.993	98.2871	873.665	660.541	782.347	MSMEG_RS19280	GntR family transcriptional regulator
MSMEG_1412	2653.65	2.76326	0.0885967	31.1892	1.4934e-213	5.08696e-212	723.198	702.629	617.025	4544.95	4891.37	4442.72	MSMEG_RS06900	amino acid permease
MSMEG_5813	52.775	2.75923	0.296043	9.32038	1.15922e-20	4.35193e-20	10.7273	11.7557	18.0193	113.545	74.8488	87.7538	MSMEG_RS28010	mycofactocin-coupled SDR family oxidoreductase
MSMEG_4077	107.996	2.75794	0.232765	11.8486	2.18842e-32	1.13269e-31	36.6516	25.7721	20.7495	170.317	226.418	168.071	MSMEG_RS19730	enoyl-CoA hydratase/isomerase family protein
MSMEG_0659	88.1608	2.75362	0.242513	11.3545	7.04153e-30	3.42393e-29	28.1591	23.9635	15.2891	170.317	129.114	162.121	MSMEG_RS03210	ABC transporter permease
MSMEG_4045	32.6591	2.72931	0.34269	7.96435	1.66099e-15	5.17548e-15	8.9394	8.13856	8.19059	66.2345	52.3942	52.0573	MSMEG_RS19595	muconolactone Delta-isomerase family protein
MSMEG_5141	74.9235	2.72612	0.229799	11.863	1.84147e-32	9.56155e-32	19.2197	20.7985	18.5653	138.777	127.243	124.938	MSMEG_RS24790	NarK/NasA family nitrate transporter
MSMEG_5948	33.2573	2.72247	0.359696	7.5688	3.76702e-14	1.1135e-13	8.9394	10.3993	6.00643	75.6966	52.3942	46.1079	MSMEG_RS28670	glycosyltransferase family 2 protein
MSMEG_2193	497.289	2.71886	0.180481	15.0646	2.77016e-51	2.08114e-50	181.023	107.158	104.294	879.973	881.345	829.942	MSMEG_RS10645	TetR/AcrR family transcriptional regulator
MSMEG_0130	95.3087	2.71659	0.215135	12.6274	1.49111e-36	8.61561e-36	27.7122	25.7721	22.9337	132.469	181.508	181.457	MSMEG_RS00640	GntR family transcriptional regulator
MSMEG_1518	307.535	2.71211	0.127104	21.3378	5.06483e-101	7.08641e-100	84.4774	77.3163	83.544	504.644	546.396	548.833	MSMEG_RS07420	hypothetical protein
MSMEG_6398	13097.7	2.70515	0.0691917	39.0964	0	0	3343.78	3563.79	3539.43	23671	21668.7	22799.6	MSMEG_RS30860	esterase family protein
MSMEG_2259	759.331	2.70263	0.122209	22.1148	2.2757e-108	3.46738e-107	222.144	214.768	167.088	1400.39	1337.92	1213.68	MSMEG_RS10945	carbon starvation protein A
MSMEG_3756	1.43841e+07	2.6973	0.101956	26.4555	3.15603e-154	6.86727e-153	4.16737e+06	3.90255e+06	3.45908e+06	2.81011e+07	2.29372e+07	2.37372e+07	MSMEG_RS18205	23S ribosomal RNA
MSMEG_4930	1.46019e+07	2.69604	0.10179	26.4862	1.39738e-154	3.06107e-153	4.23367e+06	3.96552e+06	3.51322e+06	2.84944e+07	2.3259e+07	2.41455e+07	MSMEG_RS23765	23S ribosomal RNA
MSMEG_4379	878.973	2.69528	0.0950135	28.3674	5.11198e-177	1.35197e-175	235.106	251.391	218.416	1491.85	1579.31	1497.76	MSMEG_RS21185	cysteine hydrolase
MSMEG_1763	418.137	2.69389	0.119068	22.6248	2.46808e-113	3.86924e-112	115.318	102.184	117.398	763.274	735.389	675.258	MSMEG_RS08570	Lrp/AsnC family transcriptional regulator
MSMEG_4657	510.044	2.691	0.123461	21.7965	2.50646e-105	3.70614e-104	152.864	141.973	114.122	886.281	911.284	853.74	MSMEG_RS22470	ABC transporter permease
MSMEG_1840	47.3512	2.6882	0.303733	8.85055	8.70895e-19	3.07005e-18	16.5379	9.49499	11.4668	97.7748	72.9776	75.855	MSMEG_RS08940	rubredoxin
MSMEG_3022	9297.54	2.68351	0.0970999	27.6366	4.04193e-168	9.92333e-167	2397.1	2243.08	2875.44	16202.2	15914.7	16152.6	MSMEG_RS14680	GlsB/YeaQ/YmgE family stress response membrane protein
MSMEG_6293	2062.55	2.67712	0.0868923	30.8097	1.94597e-208	6.33023e-207	521.167	546.64	605.012	3712.29	3587.13	3403.06	MSMEG_RS30360	TetR/AcrR family transcriptional regulator
MSMEG_2582	159.547	2.66282	0.163752	16.2613	1.85718e-59	1.58775e-58	44.697	42.0492	43.1371	290.17	276.941	260.287	MSMEG_RS12525	AhpC/TSA family protein
MSMEG_3337	25.7099	2.65544	0.388298	6.83868	7.99272e-12	2.1479e-11	7.15152	6.78213	7.64455	31.5403	58.0078	43.1332	MSMEG_RS16210	hypothetical protein
MSMEG_4714	286.275	2.65493	0.152538	17.405	7.5602e-68	7.24399e-67	94.3107	73.6992	65.5247	536.184	480.904	467.029	MSMEG_RS22745	MaoC family dehydratase
MSMEG_5960	132.274	2.64668	0.183925	14.39	5.98125e-47	4.15748e-46	39.3334	32.5542	37.6767	230.244	203.963	249.875	MSMEG_RS28725	O-antigen ligase family protein
MSMEG_5993	109.946	2.64565	0.19239	13.7515	4.98922e-43	3.27877e-42	33.5228	28.9371	28.3941	186.088	190.864	191.868	MSMEG_RS28890	acyl-CoA dehydrogenase family protein
MSMEG_5991	37.1665	2.63858	0.32062	8.22963	1.87796e-16	6.07256e-16	10.7273	10.8514	8.73663	72.5426	63.6215	56.5194	MSMEG_RS28880	MaoC family dehydratase
MSMEG_5765	20.0007	2.63739	0.436893	6.03669	1.57306e-09	3.76124e-09	4.91667	6.32999	4.91435	44.1564	29.9395	29.747	MSMEG_RS27790	group 1 truncated hemoglobin
MSMEG_6174	42.2353	2.63655	0.306822	8.59309	8.46617e-18	2.87629e-17	11.1743	14.0164	9.28267	82.0047	72.9776	63.9561	MSMEG_RS29785	IclR family transcriptional regulator
MSMEG_2103	45.6206	2.63439	0.293661	8.97088	2.94166e-19	1.05971e-18	12.5152	13.1121	13.1049	63.0805	76.72	95.1905	MSMEG_RS10210	LLM class flavin-dependent oxidoreductase
MSMEG_4715	685.266	2.63224	0.106824	24.641	4.59941e-134	8.62356e-133	197.561	205.273	166.542	1201.68	1186.35	1154.19	MSMEG_RS22750	acyl-CoA dehydrogenase family protein
MSMEG_5608	57.4979	2.6316	0.280339	9.38722	6.16054e-21	2.33161e-20	14.75	16.7293	16.3812	110.391	69.2351	117.501	MSMEG_RS27025	acetyl-CoA acetyltransferase
MSMEG_0660	780.752	2.62814	0.118395	22.198	3.59261e-109	5.51262e-108	231.978	239.183	179.101	1394.08	1291.14	1349.03	MSMEG_RS03215	spermidine/putrescine ABC transporter substrate-binding protein
MSMEG_4658	1000.77	2.6269	0.101281	25.9367	2.567e-148	5.38739e-147	310.644	276.711	247.902	1737.87	1704.68	1726.82	MSMEG_RS22475	substrate-binding domain-containing protein
MSMEG_5958	51.3264	2.62256	0.362622	7.23221	4.75189e-13	1.34125e-12	7.15152	15.3728	20.2035	119.853	56.1366	89.2411	MSMEG_RS28720	hypothetical protein
MSMEG_4857	11.4543	2.61443	0.61949	4.22029	2.43988e-05	4.55883e-05	2.23485	4.06928	2.7302	34.6943	13.0985	11.8988	MSMEG_RS23405	ferredoxin
MSMEG_RS27520	27.4269	2.61153	0.438032	5.96196	2.49227e-09	5.90271e-09	11.1743	3.61714	7.64455	69.3886	35.5532	37.1838	MSMEG_RS27520	ESX-1 secretion-associated protein
MSMEG_6145	537.934	2.61033	0.130715	19.9697	1.01075e-88	1.25495e-87	150.182	147.851	152.891	1113.37	821.466	841.841	MSMEG_RS29650	hypothetical protein
MSMEG_1411	709.948	2.60863	0.0969791	26.8989	2.26165e-159	5.1629e-158	195.326	212.507	192.752	1176.45	1255.59	1227.07	MSMEG_RS06895	universal stress protein
MSMEG_0988	15300.7	2.60631	0.0729513	35.7268	1.51887e-279	7.16072e-278	4033.46	4378.09	4537.59	26771.4	26743.5	25340	MSMEG_RS04810	1,4-dihydroxy-2-naphthoate polyprenyltransferase
MSMEG_3786	58.7079	2.5944	0.281178	9.22688	2.78622e-20	1.0323e-19	17.8788	20.7985	10.3747	116.699	89.8186	96.6779	MSMEG_RS18355	amino acid deaminase
MSMEG_2532	102.849	2.59035	0.2181	11.8769	1.56018e-32	8.13342e-32	27.2652	36.6235	24.5718	145.085	202.092	181.457	MSMEG_RS12280	3-dehydroquinate dehydratase
MSMEG_4574	44.446	2.58986	0.288432	8.9791	2.72979e-19	9.85025e-19	12.0682	12.66	13.651	69.3886	78.5912	80.317	MSMEG_RS22090	ComEA family DNA-binding protein
MSMEG_2344	1542.12	2.5885	0.13644	18.9717	2.92178e-80	3.26057e-79	354	426.822	538.941	2794.47	2434.46	2704.01	MSMEG_RS11345	FAD-dependent oxidoreductase
MSMEG_1413	6375.81	2.58555	0.0779903	33.1522	5.26417e-241	2.10115e-239	1813.36	1950.54	1699.27	10569.1	11339.6	10883	MSMEG_RS06905	ornithine--oxo-acid transaminase
MSMEG_6291	29470.9	2.57497	0.0703341	36.6106	1.93997e-293	9.78408e-292	8770	7960.42	8678.75	52356.8	49911.1	49148.1	MSMEG_RS30350	FAD-binding oxidoreductase
MSMEG_5860	28.101	2.56975	0.384137	6.68967	2.23672e-11	5.87964e-11	9.83334	8.13856	5.46039	63.0805	44.9093	37.1838	MSMEG_RS28245	TetR family transcriptional regulator
MSMEG_2494	92.479	2.56513	0.206039	12.4497	1.40403e-35	7.89506e-35	28.1591	27.5807	24.0257	164.009	153.44	157.659	MSMEG_RS12095	M24 family metallopeptidase
MSMEG_5271	713.067	2.5618	0.103367	24.7835	1.34917e-135	2.55909e-134	214.993	214.315	188.93	1223.76	1291.14	1145.26	MSMEG_RS25410	alpha/beta hydrolase
MSMEG_0233	10448.7	2.55944	0.0640555	39.9566	0	0	2933.47	3062.81	3096.04	18201.9	17336.9	18060.9	MSMEG_RS01145	L,D-transpeptidase
MSMEG_0674	813.056	2.55633	0.0929329	27.5072	1.43822e-166	3.44011e-165	246.728	221.55	241.349	1365.69	1403.42	1399.6	MSMEG_RS03285	L,D-transpeptidase
MSMEG_1495	255.556	2.55378	0.136176	18.7536	1.81074e-78	1.97332e-77	68.8334	75.0556	78.6297	463.642	424.767	422.408	MSMEG_RS07305	haloacid dehalogenase
MSMEG_3866	7.09163	2.55242	0.719814	3.54594	0.000391208	0.00066264	2.23485	2.71285	1.09208	12.6161	14.9698	8.92411	MSMEG_RS18735	hypothetical protein
MSMEG_1456	208.113	2.55239	0.152588	16.7273	8.28612e-63	7.43579e-62	62.1289	53.3528	65.5247	387.945	348.047	331.68	MSMEG_RS07110	helix-turn-helix domain-containing protein
MSMEG_6121	9.93689	2.54805	0.617192	4.12846	3.65194e-05	6.74603e-05	4.02273	2.26071	2.18416	22.0782	11.2273	17.8482	MSMEG_RS29530	ABC transporter ATP-binding protein
MSMEG_5908	188.635	2.54339	0.187046	13.5977	4.13424e-42	2.66047e-41	49.6137	50.6399	63.8866	391.099	323.721	252.85	MSMEG_RS28475	long-chain-fatty-acid--CoA ligase FadD17
MSMEG_2274	723.221	2.54176	0.119704	21.2337	4.66098e-100	6.45198e-99	248.962	200.299	185.107	1264.76	1244.36	1195.83	MSMEG_RS11015	HypC/HybG/HupF family hydrogenase formation chaperone
MSMEG_5864	24.3258	2.53884	0.400942	6.33219	2.41706e-10	6.06222e-10	8.04546	6.78213	6.00643	50.4644	44.9093	29.747	MSMEG_RS28265	ferredoxin
MSMEG_3787	65.3616	2.5358	0.290422	8.73143	2.51462e-18	8.74404e-18	21.4546	25.7721	9.82871	113.545	108.531	113.039	MSMEG_RS18360	D-aminoacylase
MSMEG_6292	4293.27	2.53522	0.0845439	29.987	1.44893e-197	4.44656e-196	1246.15	1218.98	1321.96	7872.45	7402.55	6697.55	MSMEG_RS30355	transcription elongation factor GreA
MSMEG_4783	16.3437	2.53218	0.4665	5.42804	5.69754e-08	1.2523e-07	4.4697	4.52142	5.46039	28.3862	29.9395	25.285	MSMEG_RS23050	hypothetical protein
MSMEG_6236	1375.44	2.53182	0.0843211	30.0259	4.50495e-198	1.38906e-196	400.932	412.354	406.253	2179.43	2438.2	2415.46	MSMEG_RS30085	two-component system response regulator MnoR
MSMEG_0989	3571.07	2.52789	0.0775484	32.5976	4.43447e-233	1.70714e-231	1085.69	1039.93	1039.66	6257.59	5651.08	6352.48	MSMEG_RS04815	hypothetical protein
MSMEG_2856	16.8713	2.52524	0.494273	5.10899	3.23889e-07	6.82391e-07	2.68182	6.32999	6.55247	18.9242	28.0683	38.6712	MSMEG_RS13850	MCE family protein
MSMEG_4680	2263.42	2.52425	0.0799176	31.5856	5.81485e-219	2.07865e-217	682.97	647.016	682.549	3709.13	4116.68	3742.18	MSMEG_RS22575	serine hydrolase
MSMEG_1414	7481.9	2.52355	0.0743024	33.9632	7.78769e-253	3.33334e-251	2219.21	2314.06	2115.9	12704.4	13412.9	12124.9	MSMEG_RS06910	dimethylarginine dimethylaminohydrolase family protein
MSMEG_6530	28.737	2.51098	0.395553	6.34801	2.18116e-10	5.48536e-10	8.49243	9.94713	8.19059	28.3862	43.0381	74.3676	MSMEG_RS31495	cytochrome c oxidase subunit 3 family protein
MSMEG_5350	29.703	2.51092	0.365388	6.87192	6.33454e-12	1.71362e-11	10.7273	9.49499	6.00643	50.4644	59.879	41.6459	MSMEG_RS25785	alpha/beta fold hydrolase
MSMEG_6428	2759.49	2.50834	0.0873267	28.7236	1.93355e-181	5.21979e-180	825.554	860.427	785.205	4989.67	4825.88	4270.19	MSMEG_RS31015	hypothetical protein
MSMEG_4495	920.689	2.50583	0.0963141	26.0173	3.15908e-149	6.73868e-148	283.826	289.823	250.632	1649.56	1521.3	1529	MSMEG_RS21720	HlyC/CorC family transporter
MSMEG_5568	575.086	2.5047	0.145695	17.1913	3.08281e-66	2.87346e-65	174.318	195.325	144.154	1154.37	828.951	953.393	MSMEG_RS26835	SDR family NAD(P)-dependent oxidoreductase
MSMEG_2536	119.973	2.50237	0.236567	10.5779	3.77463e-26	1.65484e-25	42.0152	25.7721	41.499	176.625	172.152	261.774	MSMEG_RS12300	3-oxoacyl-ACP reductase FabG
MSMEG_5710	38.7128	2.49397	0.319559	7.80441	5.97827e-15	1.82091e-14	9.38637	12.2078	13.1049	72.5426	72.9776	52.0573	MSMEG_RS27525	hypothetical protein
MSMEG_5949	66.8333	2.49033	0.245285	10.1528	3.22044e-24	1.34051e-23	20.5606	20.3464	20.2035	107.237	97.3034	135.349	MSMEG_RS28675	hypothetical protein
MSMEG_3766	8793.7	2.49031	0.0744096	33.4676	1.42993e-245	5.96354e-244	2759.15	2693.86	2513.97	15732.3	14820.1	14242.9	MSMEG_RS18255	hypothetical protein
MSMEG_4103	23.2091	2.49025	0.438477	5.67933	1.35222e-08	3.07499e-08	7.15152	4.52142	8.73663	59.9265	26.1971	32.7217	MSMEG_RS19860	LLM class flavin-dependent oxidoreductase
MSMEG_1839	398.46	2.48824	0.161685	15.3895	1.926e-53	1.49708e-52	151.97	114.844	92.8267	731.734	664.283	635.099	MSMEG_RS08935	alkane 1-monooxygenase
MSMEG_5995	164.378	2.48509	0.166342	14.9397	1.81846e-50	1.3552e-49	57.2122	48.3792	44.2292	258.63	286.297	291.521	MSMEG_RS28900	cytochrome P450
MSMEG_6019	94.5439	2.47883	0.217085	11.4187	3.3736e-30	1.65525e-29	22.3485	34.3628	30.0322	154.547	153.44	172.533	MSMEG_RS29020	sugar ABC transporter ATP-binding protein
MSMEG_5853	47.351	2.47089	0.293976	8.40508	4.27566e-17	1.41565e-16	15.197	18.0857	10.3747	66.2345	87.9473	86.2664	MSMEG_RS28210	cytochrome P450
MSMEG_1376	291.343	2.46984	0.137075	18.0182	1.40223e-72	1.41003e-71	94.7577	95.402	75.8995	514.106	462.191	505.7	MSMEG_RS06720	xylulose kinase
MSMEG_4563	542.618	2.46897	0.11495	21.4788	2.46015e-102	3.49471e-101	153.311	170.006	174.733	961.978	821.466	974.216	MSMEG_RS22035	GNAT family N-acetyltransferase
MSMEG_4565	184.17	2.46145	0.15799	15.5798	9.98988e-55	7.90683e-54	59.894	56.9699	51.8737	321.711	334.948	279.622	MSMEG_RS22045	aldo/keto reductase
MSMEG_6018	143.687	2.45986	0.16902	14.5537	5.53473e-48	3.95703e-47	43.8031	46.5707	41.499	252.322	248.872	229.052	MSMEG_RS29015	ABC transporter permease
MSMEG_2258	103.69	2.45678	0.196275	12.517	6.02604e-36	3.42106e-35	32.6288	32.5542	31.6703	154.547	175.895	194.843	MSMEG_RS10940	YbdD/YjiX family protein
MSMEG_5965	747.489	2.45487	0.0934917	26.2576	5.85477e-152	1.2613e-150	236.447	237.375	217.324	1271.07	1240.62	1282.1	MSMEG_RS28755	hypothetical protein
MSMEG_1375	70.752	2.44902	0.232707	10.524	6.69336e-26	2.91284e-25	21.4546	19.8943	24.0257	129.315	119.758	110.064	MSMEG_RS06715	class II fructose-bisphosphate aldolase
MSMEG_4782	81.2799	2.4475	0.231352	10.5791	3.72527e-26	1.6343e-25	31.7349	23.5114	19.6574	141.931	138.47	132.374	MSMEG_RS23045	hypothetical protein
MSMEG_5946	62.6635	2.44435	0.245513	9.95608	2.37229e-23	9.63427e-23	18.7727	20.3464	18.5653	119.853	97.3034	101.14	MSMEG_RS28665	oligosaccharide flippase family protein
MSMEG_3440	6565.04	2.44393	0.086033	28.4069	1.66012e-177	4.42652e-176	1967.12	2045.49	2098.98	12262.9	10220.6	10795.2	MSMEG_RS16725	L-serine ammonia-lyase
MSMEG_6792	338.071	2.44358	0.132347	18.4635	4.06419e-76	4.28551e-75	118	106.706	90.0965	555.109	557.624	600.89	MSMEG_RS32740	GntP family permease
MSMEG_0529	2167.47	2.44243	0.0843164	28.9674	1.69489e-184	4.67243e-183	711.13	628.478	683.641	3504.12	3613.33	3864.14	MSMEG_RS02570	protein kinase
MSMEG_5918	74.0157	2.44045	0.231831	10.5269	6.49544e-26	2.8305e-25	25.4773	21.7028	22.9337	100.929	134.728	138.324	MSMEG_RS28525	steroid C26-monooxygenase Cyp142
MSMEG_1762	382.743	2.43967	0.133827	18.23	2.98321e-74	3.0565e-73	100.121	122.078	134.872	693.886	611.889	633.612	MSMEG_RS08565	aldehyde dehydrogenase family protein
MSMEG_0722	23.867	2.43949	0.397169	6.14219	8.13923e-10	1.98627e-09	5.36364	9.04285	7.64455	47.3104	33.682	40.1585	MSMEG_RS03525	hypothetical protein
MSMEG_4497	2341.63	2.43587	0.0860799	28.2977	3.68441e-176	9.70477e-175	754.039	741.061	691.832	4308.4	3785.48	3768.95	MSMEG_RS21730	PhoH family protein
MSMEG_5372	123.046	2.43255	0.186938	13.0126	1.03748e-38	6.29647e-38	32.1819	42.9535	39.8609	220.782	200.221	202.28	MSMEG_RS25890	sensor histidine kinase KdpD
MSMEG_6493	48.0823	2.43147	0.289955	8.38569	5.04277e-17	1.66709e-16	17.8788	14.9207	12.5589	66.2345	101.046	75.855	MSMEG_RS31320	ABC transporter substrate-binding protein
MSMEG_3311	504.899	2.43077	0.11835	20.5389	9.67141e-94	1.2635e-92	158.227	146.946	166.542	961.978	774.685	821.018	MSMEG_RS16070	hypothetical protein
MSMEG_3477	1703.05	2.42896	0.0870127	27.915	1.75459e-171	4.51199e-170	576.145	494.192	530.75	2794.47	2971.5	2851.25	MSMEG_RS16895	NlpC/P60 family peptidoglycan-binding protein RipD
MSMEG_5975	35.7536	2.42703	0.332456	7.3003	2.87126e-13	8.1574e-13	12.0682	8.13856	14.197	47.3104	67.3639	65.4435	MSMEG_RS28800	transferase
MSMEG_2544	451.483	2.42203	0.109492	22.1207	1.99927e-108	3.05334e-107	150.629	139.712	134.326	785.352	752.23	746.651	MSMEG_RS12340	LysR family transcriptional regulator
MSMEG_2272	446.745	2.4197	0.15033	16.0959	2.72494e-58	2.27873e-57	175.212	130.669	114.668	794.814	703.579	761.524	MSMEG_RS11005	hydrogenase maturation nickel metallochaperone HypA
MSMEG_5501	78.054	2.41936	0.234361	10.3232	5.53384e-25	2.34396e-24	22.7955	30.7457	20.7495	113.545	134.728	145.76	MSMEG_RS26500	ATPase AAA
MSMEG_5347	39.6889	2.41285	0.348718	6.91919	4.54223e-12	1.23803e-11	18.7727	11.7557	7.09851	59.9265	61.7503	78.8297	MSMEG_RS25770	MFS transporter
MSMEG_0227	332.918	2.41119	0.145	16.6289	4.30431e-62	3.83615e-61	88.5001	109.418	117.945	608.727	488.388	584.529	MSMEG_RS01115	TetR/AcrR family transcriptional regulator
MSMEG_1374	132.706	2.40564	0.185366	12.9778	1.63464e-38	9.83811e-38	44.697	35.2671	46.4134	223.936	245.13	200.793	MSMEG_RS06710	substrate-binding domain-containing protein
MSMEG_2275	2926.48	2.40381	0.121882	19.7224	1.38578e-86	1.66345e-85	1097.76	933.674	756.811	5147.37	4814.65	4808.61	MSMEG_RS11020	hydrogenase formation protein HypD
MSMEG_4173	19.0957	2.4033	0.434214	5.53482	3.11552e-08	6.93688e-08	7.59849	5.42571	4.91435	34.6943	33.682	28.2597	MSMEG_RS20190	MaoC family dehydratase N-terminal domain-containing protein
MSMEG_0728	216.179	2.40062	0.175441	13.6833	1.27677e-42	8.30667e-42	77.7728	73.6992	52.9658	419.485	308.751	364.401	MSMEG_RS03545	ESX-1 secretion-associated protein
MSMEG_4058	537.768	2.39846	0.108485	22.1086	2.61088e-108	3.95954e-107	181.47	174.075	157.805	930.438	845.791	937.032	MSMEG_RS19645	MHS family MFS transporter
MSMEG_0522	102.184	2.39675	0.200369	11.9617	5.64033e-33	2.98341e-32	31.2879	28.485	38.2228	179.779	162.796	172.533	MSMEG_RS33480	pp24 protein
MSMEG_2236	26.3297	2.39588	0.391255	6.12358	9.14958e-10	2.22698e-09	9.38637	5.87785	9.28267	59.9265	39.2956	34.2091	MSMEG_RS10840	thiolase family protein
MSMEG_3382	107.189	2.38732	0.207678	11.4953	1.3932e-30	6.88244e-30	41.1213	35.7192	26.2099	173.471	170.281	196.33	MSMEG_RS16445	winged helix-turn-helix transcriptional regulator
MSMEG_5861	80.4105	2.38696	0.219311	10.8839	1.37534e-27	6.27049e-27	29.0531	23.9635	24.5718	126.161	147.826	130.887	MSMEG_RS28250	cytochrome P450
MSMEG_3846	81.8731	2.38575	0.22689	10.515	7.36693e-26	3.19741e-25	22.7955	32.5542	22.9337	145.085	138.47	129.4	MSMEG_RS18645	phosphotransferase
MSMEG_1624	111.019	2.38296	0.192104	12.4046	2.46891e-35	1.38233e-34	37.5455	39.3364	30.0322	179.779	196.478	182.944	MSMEG_RS07935	universal stress protein
MSMEG_1359	220.263	2.37955	0.161507	14.7335	3.9307e-49	2.87016e-48	71.0683	61.4914	82.998	312.249	389.214	404.56	MSMEG_RS06630	YafY family transcriptional regulator
MSMEG_6020	180.273	2.3795	0.171329	13.8885	7.44172e-44	4.95049e-43	67.9395	61.0392	44.7752	296.478	305.009	306.395	MSMEG_RS29025	substrate-binding domain-containing protein
MSMEG_4716	509.75	2.37515	0.114441	20.7544	1.11853e-95	1.49428e-94	180.129	163.223	150.161	838.971	916.898	809.12	MSMEG_RS22755	acetyl/propionyl/methylcrotonyl-CoA carboxylase subunit alpha
MSMEG_4780	28.8315	2.37409	0.355863	6.67136	2.53442e-11	6.64876e-11	8.9394	9.49499	9.28267	50.4644	56.1366	38.6712	MSMEG_RS23035	cytochrome P450
MSMEG_2533	85.5723	2.37347	0.27551	8.61484	7.00424e-18	2.3921e-17	41.5682	22.155	19.6574	116.699	157.182	156.172	MSMEG_RS12285	hypothetical protein
MSMEG_5570	618.539	2.37306	0.114897	20.6537	9.03601e-95	1.19005e-93	211.417	201.655	183.469	1173.3	988.004	953.393	MSMEG_RS26845	ATP-dependent DNA ligase
MSMEG_4814	56.9038	2.36895	0.274331	8.63536	5.85426e-18	2.00357e-17	18.3258	23.0593	13.1049	104.083	101.046	81.8044	MSMEG_RS23200	OB-fold domain-containing protein
MSMEG_1591	228.709	2.36555	0.146848	16.1089	2.20991e-58	1.8528e-57	80.9016	64.2042	76.9916	410.023	374.244	365.889	MSMEG_RS07775	IS1380-like element ISMsm11 family transposase
MSMEG_4850	15.7365	2.36242	0.469765	5.02893	4.93213e-07	1.02848e-06	4.4697	4.97357	6.00643	25.2322	29.9395	23.7976	MSMEG_RS23370	SDR family oxidoreductase
MSMEG_5625	15.0662	2.3607	0.523424	4.51011	6.47954e-06	1.2614e-05	4.02273	3.61714	7.09851	25.2322	35.5532	14.8735	MSMEG_RS27110	NAD(P)/FAD-dependent oxidoreductase
MSMEG_5793	982.09	2.36016	0.111094	21.2448	3.68149e-100	5.10699e-99	303.046	291.18	365.3	1775.72	1622.35	1534.95	MSMEG_RS27920	hypothetical protein
MSMEG_3325	366.7	2.35627	0.126275	18.6599	1.04991e-77	1.13467e-76	128.28	112.131	116.852	684.424	557.624	600.89	MSMEG_RS16140	hypothetical protein
MSMEG_0963	425.05	2.35371	0.11061	21.2794	1.76254e-100	2.45547e-99	141.243	132.478	142.516	747.504	690.48	696.081	MSMEG_RS04690	hypothetical protein
MSMEG_4781	327.285	2.35304	0.128551	18.3043	7.64263e-75	7.90508e-74	121.129	101.28	99.3792	523.568	557.624	560.732	MSMEG_RS23040	hypothetical protein
MSMEG_0228	459.045	2.3519	0.109135	21.5504	5.24511e-103	7.51645e-102	148.394	142.877	159.444	788.506	780.299	734.752	MSMEG_RS01120	AAA family ATPase
MSMEG_0257	338.77	2.34707	0.125419	18.7138	3.81961e-78	4.14865e-77	108.614	103.088	123.951	533.03	591.306	572.631	MSMEG_RS01265	fatty-acid--CoA ligase FadD4
MSMEG_2638	20.879	2.34179	0.435466	5.37767	7.54568e-08	1.64573e-07	3.57576	8.13856	9.28267	31.5403	35.5532	37.1838	MSMEG_RS12800	dihydrodipicolinate synthase family protein
MSMEG_4813	14.7812	2.33927	0.489095	4.78286	1.72816e-06	3.5048e-06	5.36364	4.52142	4.36832	31.5403	20.5834	22.3103	MSMEG_RS23195	ferredoxin
MSMEG_2492	335.613	2.32837	0.129482	17.9822	2.68532e-72	2.69194e-71	122.023	113.94	98.2871	551.954	529.555	597.916	MSMEG_RS12080	FAD-binding oxidoreductase
MSMEG_0365	2429.79	2.32523	0.1001	23.2291	2.31184e-119	3.75083e-118	900.645	803.909	717.496	4308.4	3804.19	4044.11	MSMEG_RS01800	WXG100 family type VII secretion target
MSMEG_2144	2835.36	2.32212	0.117563	19.7521	7.69678e-87	9.30767e-86	1113.4	910.615	808.138	5084.29	4425.44	4670.29	MSMEG_RS10400	helix-turn-helix transcriptional regulator
MSMEG_6188	965.659	2.31822	0.121033	19.1536	9.03686e-82	1.02966e-80	343.72	321.473	306.328	1340.46	1631.7	1850.27	MSMEG_RS29855	hypothetical protein
MSMEG_5576	594.227	2.31819	0.13287	17.4471	3.62342e-68	3.48212e-67	240.023	186.283	169.272	936.746	1014.2	1018.84	MSMEG_RS26875	mannitol dehydrogenase family protein
MSMEG_3400	538.451	2.31152	0.115838	19.9548	1.36089e-88	1.68647e-87	181.47	199.395	158.897	920.975	928.125	841.841	MSMEG_RS16535	FCD domain-containing protein
MSMEG_0383	18490.6	2.30758	0.069624	33.1435	7.02476e-241	2.78678e-239	6591.92	6020.27	6029.37	31527.6	30944.4	29830.3	MSMEG_RS01895	hemophore-related protein
MSMEG_5368	744.541	2.30384	0.116286	19.8119	2.35107e-87	2.8698e-86	270.417	266.764	212.409	1327.84	1158.29	1231.53	MSMEG_RS25870	ectoine/hydroxyectoine ABC transporter substrate-binding protein EhuB
MSMEG_3986	233.779	2.30273	0.136924	16.8176	1.814e-63	1.64601e-62	74.197	83.6463	78.0836	400.561	377.986	388.199	MSMEG_RS19310	AMP-binding protein
MSMEG_4441	21.3163	2.29644	0.402736	5.7021	1.18337e-08	2.70331e-08	7.15152	7.68642	6.55247	37.8483	37.4244	31.2344	MSMEG_RS21465	cupin domain-containing protein
MSMEG_2167	52.0666	2.29637	0.270752	8.48145	2.22399e-17	7.44303e-17	19.2197	17.1814	15.8351	91.4667	97.3034	71.3929	MSMEG_RS10510	aminopeptidase P family protein
MSMEG_1625	128.439	2.29635	0.197046	11.6539	2.19172e-31	1.10881e-30	50.5076	35.2671	43.1371	252.322	187.122	202.28	MSMEG_RS07940	amino acid permease
MSMEG_4315	174.735	2.29297	0.16528	13.8732	9.2019e-44	6.10271e-43	66.1516	60.5871	49.1435	318.557	278.812	275.16	MSMEG_RS20890	RNA polymerase sigma factor
MSMEG_0294	14.383	2.28948	0.510071	4.48855	7.17096e-06	1.39059e-05	4.91667	5.87785	3.27624	31.5403	24.3259	16.3609	MSMEG_RS01450	SDR family oxidoreductase
MSMEG_3715	515.886	2.28804	0.105455	21.6968	2.19908e-104	3.21511e-103	186.834	174.979	164.358	842.125	842.049	884.974	MSMEG_RS18020	non-ribosomal peptide synthetase
MSMEG_1538	54.2783	2.28786	0.265638	8.61269	7.13641e-18	2.43341e-17	18.7727	14.9207	21.2955	100.929	87.9473	81.8044	MSMEG_RS07520	WXG100 family type VII secretion target
MSMEG_5522	236.673	2.28305	0.158383	14.4147	4.18024e-47	2.91809e-46	84.9243	80.4813	73.7153	457.334	402.312	321.268	MSMEG_RS26610	TetR family transcriptional regulator
MSMEG_1171	24.4285	2.28134	0.375837	6.07001	1.27901e-09	3.07625e-09	7.59849	9.04285	8.19059	44.1564	37.4244	40.1585	MSMEG_RS05705	arsenate reductase ArsC
MSMEG_1486	215.644	2.27698	0.150595	15.1199	1.19642e-51	9.03007e-51	80.0077	69.1778	73.7153	309.095	400.441	361.427	MSMEG_RS07260	sigma-70 family RNA polymerase sigma factor
MSMEG_4842	20.7693	2.27457	0.443554	5.12806	2.92736e-07	6.18557e-07	6.70455	4.06928	10.9208	34.6943	28.0683	40.1585	MSMEG_RS23335	amidohydrolase family protein
MSMEG_5971	436.162	2.27264	0.117699	19.3089	4.52028e-83	5.24224e-82	151.076	151.468	144.7	779.044	638.086	752.6	MSMEG_RS28785	hypothetical protein
MSMEG_3966	103.591	2.27028	0.211081	10.7555	5.58156e-27	2.50266e-26	37.9925	35.2671	35.4926	123.007	188.993	200.793	MSMEG_RS19215	hypothetical protein
MSMEG_0280	241.566	2.26938	0.13752	16.5023	3.53405e-61	3.1071e-60	85.3713	80.9335	81.3599	435.256	364.888	401.585	MSMEG_RS01380	alpha/beta hydrolase
MSMEG_5812	92.5075	2.26729	0.262038	8.65254	5.03671e-18	1.73105e-17	32.1819	26.6764	35.4926	205.012	93.561	162.121	MSMEG_RS28005	mycofactocin-coupled SDR family oxidoreductase
MSMEG_2874	146.408	2.26548	0.175757	12.8898	5.13713e-38	3.05784e-37	44.697	51.9964	52.9658	280.708	233.903	214.179	MSMEG_RS13940	hypothetical protein
MSMEG_5966	70.8913	2.26453	0.229108	9.88409	4.87996e-23	1.9671e-22	27.7122	21.7028	24.0257	113.545	117.887	120.476	MSMEG_RS28760	SDR family oxidoreductase
MSMEG_3010	16.0748	2.25954	0.506562	4.46054	8.17515e-06	1.57733e-05	8.49243	2.26071	6.00643	25.2322	26.1971	28.2597	MSMEG_RS14620	alpha/beta hydrolase
MSMEG_5762	258.574	2.25768	0.139464	16.1883	6.10081e-59	5.16821e-58	88.0531	85.0028	93.3727	473.104	434.123	377.787	MSMEG_RS27775	NADP-dependent oxidoreductase
MSMEG_0511	32.7507	2.2572	0.330192	6.836	8.14335e-12	2.18567e-11	12.9621	9.49499	11.4668	53.6184	59.879	49.0826	MSMEG_RS02485	SIS domain-containing protein
MSMEG_3141	2711.81	2.25576	0.13684	16.4847	4.7239e-61	4.13087e-60	1083.9	853.193	875.301	5465.93	4086.74	3905.79	MSMEG_RS15250	hypothetical protein
MSMEG_4349	821.01	2.2542	0.0888142	25.381	4.08347e-142	8.2251e-141	285.167	284.398	285.033	1315.23	1414.64	1341.59	MSMEG_RS21050	Hsp70 family protein
MSMEG_3522	3064.06	2.25042	0.0830118	27.1097	7.57089e-162	1.76546e-160	1036.97	1158.39	997.068	4961.28	5245.03	4985.6	MSMEG_RS17110	dopamine receptor D4
MSMEG_3336	106.562	2.24814	0.193703	11.6061	3.83522e-31	1.92828e-30	35.3106	38.8842	36.0386	198.704	153.44	176.995	MSMEG_RS16205	alpha/beta hydrolase
MSMEG_5761	143.714	2.24789	0.188107	11.95	6.48898e-33	3.42118e-32	54.0834	54.2571	39.8609	274.4	200.221	239.464	MSMEG_RS27770	cupin domain-containing protein
MSMEG_RS16305	85.5989	2.24653	0.22356	10.0489	9.2918e-24	3.83095e-23	32.6288	33.9107	21.8416	151.393	138.47	135.349	MSMEG_RS16305	hypothetical protein
MSMEG_6794	67.8672	2.24481	0.233118	9.62951	6.00121e-22	2.34921e-21	24.1364	23.9635	22.9337	113.545	99.1747	123.45	MSMEG_RS32750	helix-turn-helix domain-containing protein
MSMEG_3132	926.889	2.24316	0.0917098	24.4593	4.00567e-132	7.27958e-131	324.053	330.968	311.242	1649.56	1474.52	1470.99	MSMEG_RS15210	helix-turn-helix domain-containing protein
MSMEG_4841	6.76503	2.24265	0.724688	3.09464	0.00197052	0.00314067	2.23485	1.35643	3.82228	6.30805	14.9698	11.8988	MSMEG_RS23330	hypothetical protein
MSMEG_2238	18.9878	2.23915	0.472425	4.7397	2.14033e-06	4.31248e-06	8.04546	7.68642	3.27624	44.1564	29.9395	20.8229	MSMEG_RS10850	aldehyde dehydrogenase family protein
MSMEG_1711	112.45	2.23876	0.210404	10.6403	1.93568e-26	8.57869e-26	49.1667	38.8842	29.4861	186.088	170.281	200.793	MSMEG_RS08350	sugar ABC transporter ATP-binding protein
MSMEG_4496	701.527	2.23773	0.102139	21.9087	2.14394e-106	3.18458e-105	251.197	262.243	222.784	1141.76	1118.99	1212.19	MSMEG_RS21725	rRNA maturation RNase YbeY
MSMEG_0314	100.694	2.23746	0.218036	10.2619	1.04653e-24	4.39839e-24	39.3334	31.65	36.5846	129.315	159.054	208.229	MSMEG_RS01550	glucose-6-phosphate dehydrogenase
MSMEG_4172	45.6177	2.23627	0.2862	7.81365	5.55574e-15	1.6938e-14	17.4318	12.2078	18.5653	72.5426	78.5912	74.3676	MSMEG_RS20185	ABC transporter substrate-binding protein
MSMEG_2488	381.871	2.23557	0.117378	19.0459	7.09871e-81	8.03204e-80	141.243	138.808	120.129	640.267	623.116	627.663	MSMEG_RS12065	NAD-dependent succinate-semialdehyde dehydrogenase
MSMEG_1310	235.742	2.23556	0.14135	15.8158	2.42121e-56	1.96659e-55	92.0759	80.4813	74.2614	394.253	398.57	374.813	MSMEG_RS06400	IS1380-like element ISMsm11 family transposase
MSMEG_5764	99.9325	2.23333	0.201705	11.0723	1.71047e-28	7.96585e-28	40.2273	34.3628	30.0322	164.009	177.766	153.197	MSMEG_RS27785	HD domain-containing protein
MSMEG_3439	3101.04	2.2286	0.0987916	22.5586	1.10446e-112	1.71905e-111	1021.77	1130.36	1115.56	5781.33	4608.82	4948.42	MSMEG_RS33555	hypothetical protein
MSMEG_4556	776.639	2.22822	0.0932725	23.8893	3.95229e-126	6.82059e-125	291.425	260.886	266.467	1293.15	1283.66	1264.25	MSMEG_RS22000	translation elongation factor 4
MSMEG_1613	27.0431	2.22692	0.38702	5.75401	8.71527e-09	2.00288e-08	7.59849	11.7557	8.19059	63.0805	37.4244	34.2091	MSMEG_RS07880	amino acid ABC transporter permease
MSMEG_3833	7477.3	2.22353	0.0685271	32.4475	5.87991e-231	2.23712e-229	2755.57	2627.4	2525.98	12587.7	12411.8	11955.3	MSMEG_RS18585	30S ribosomal protein S1
MSMEG_1761	790.815	2.22335	0.112006	19.8503	1.09467e-87	1.34376e-86	270.864	269.929	292.131	1498.16	1246.23	1167.57	MSMEG_RS08555	lipase maturation factor family protein
MSMEG_6816	389.26	2.22214	0.11965	18.5721	5.40711e-77	5.76699e-76	126.94	149.207	136.51	640.267	604.404	678.233	MSMEG_RS32860	molybdopterin-dependent oxidoreductase
MSMEG_4844	27.2	2.20983	0.454673	4.86026	1.17231e-06	2.39619e-06	10.7273	8.5907	10.9208	9.46208	65.4927	58.0067	MSMEG_RS23345	acyl-CoA dehydrogenase family protein
MSMEG_5314	5.36935	2.2082	0.816088	2.70583	0.00681336	0.0102825	3.12879	1.35643	1.09208	9.46208	11.2273	5.94941	MSMEG_RS25610	DUF559 domain-containing protein
MSMEG_0298	3.62746	2.20559	0.970877	2.27175	0.0231016	0.0325252	0.44697	1.80857	1.63812	6.30805	5.61366	5.94941	MSMEG_RS01470	hypothetical protein
MSMEG_5107	144.43	2.196	0.170943	12.8463	9.0172e-38	5.33326e-37	58.1061	52.4485	44.7752	227.09	235.774	248.388	MSMEG_RS24630	alpha/beta hydrolase
MSMEG_2464	93.3503	2.19283	0.212669	10.311	6.2839e-25	2.6513e-24	40.6743	29.3893	30.5782	141.931	170.281	147.248	MSMEG_RS11950	(2Fe-2S)-binding protein
MSMEG_0086	70.6793	2.19246	0.246461	8.89577	5.80133e-19	2.05911e-18	24.1364	28.485	25.1178	78.8506	136.599	130.887	MSMEG_RS00425	hexose kinase
MSMEG_4350	51.9454	2.19137	0.264513	8.28456	1.18543e-16	3.86779e-16	20.5606	17.6336	18.5653	72.5426	84.2049	98.1652	MSMEG_RS21055	dihydrodipicolinate reductase
MSMEG_4757	8751.24	2.19055	0.0925133	23.6782	6.04641e-124	1.02979e-122	3312.94	3095.37	3031.06	13269	13644.9	16154.1	MSMEG_RS22940	type I polyketide synthase
MSMEG_2143	932.534	2.18962	0.11848	18.4809	2.94095e-76	3.11119e-75	382.159	312.882	307.42	1715.79	1394.06	1482.89	MSMEG_RS10395	SecB-like chaperone SecBL
MSMEG_0432	112.208	2.18928	0.184347	11.8759	1.57993e-32	8.22982e-32	38.4394	41.145	42.045	179.779	174.023	197.818	MSMEG_RS02115	uroporphyrinogen-III synthase
MSMEG_6637	134.264	2.18911	0.169293	12.9308	3.01518e-38	1.80301e-37	47.8258	47.9271	48.5975	233.398	207.705	220.128	MSMEG_RS32005	hypothetical protein
MSMEG_0486	30.3839	2.18838	0.337369	6.48659	8.78015e-11	2.25785e-10	12.0682	10.8514	9.82871	47.3104	56.1366	46.1079	MSMEG_RS02370	ABC transporter substrate-binding protein
MSMEG_5967	330.335	2.18358	0.12453	17.5346	7.79697e-69	7.54867e-68	115.765	110.323	132.142	548.8	520.199	554.782	MSMEG_RS28765	GMC family oxidoreductase N-terminal domain-containing protein
MSMEG_5569	393.791	2.18124	0.153149	14.2425	4.98767e-46	3.40859e-45	169.849	129.313	124.497	744.35	639.957	554.782	MSMEG_RS26840	SDR family NAD(P)-dependent oxidoreductase
MSMEG_4737	31.8756	2.18064	0.336657	6.47732	9.33641e-11	2.399e-10	12.5152	9.04285	13.651	44.1564	52.3942	59.4941	MSMEG_RS22860	polysaccharide pyruvyl transferase family protein
MSMEG_1976	457.125	2.17927	0.140182	15.546	1.69323e-54	1.33854e-53	195.326	142.425	156.167	807.431	776.556	664.846	MSMEG_RS09590	iron-sulfur cluster assembly protein
MSMEG_5097	31.9551	2.17716	0.34382	6.33226	2.41588e-10	6.06161e-10	14.303	12.66	7.64455	50.4644	48.6517	58.0067	MSMEG_RS24580	hypothetical protein
MSMEG_0664	431.919	2.17707	0.122847	17.7218	2.84811e-70	2.79907e-69	175.659	151.92	139.786	731.734	733.518	658.897	MSMEG_RS03235	NAD(P)/FAD-dependent oxidoreductase
MSMEG_1212	1419.42	2.17545	0.30908	7.03847	1.94362e-12	5.36952e-12	377.69	433.152	733.331	2264.59	2415.75	2292.01	MSMEG_RS05905	hypothetical protein
MSMEG_RS16190	16.9528	2.17535	0.504464	4.31219	1.61643e-05	3.05534e-05	8.49243	7.23428	3.27624	12.6161	29.9395	40.1585	MSMEG_RS16190	CapA family protein
MSMEG_4856	24.9108	2.17382	0.384446	5.65443	1.5636e-08	3.54083e-08	9.38637	6.78213	10.9208	41.0023	48.6517	32.7217	MSMEG_RS23400	cytochrome P450
MSMEG_6828	93.2608	2.1697	0.212518	10.2095	1.79802e-24	7.5228e-24	37.0985	32.5542	30.5782	173.471	160.925	124.938	MSMEG_RS32915	AAA family ATPase
MSMEG_3129	92.3827	2.16758	0.198625	10.9129	9.99606e-28	4.57666e-27	33.9697	35.2671	31.6703	148.239	153.44	151.71	MSMEG_RS15195	TetR/AcrR family transcriptional regulator C-terminal ligand-binding domain-containing protein
MSMEG_2115	5048.89	2.16409	0.106758	20.2711	2.31558e-91	2.96558e-90	1676.14	1738.04	2110.44	9055.21	7640.19	8073.35	MSMEG_RS10260	hypothetical protein
MSMEG_4564	51.2793	2.16084	0.268793	8.03903	9.05541e-16	2.85162e-15	16.0909	20.7985	18.5653	97.7748	78.5912	75.855	MSMEG_RS22040	CBS domain-containing protein
MSMEG_1060	2578.64	2.16074	0.111107	19.4473	3.0735e-84	3.59644e-83	998.978	937.743	885.13	4942.36	3959.5	3748.13	MSMEG_RS05155	Lsr2 family protein
MSMEG_5108	75.4771	2.1559	0.217855	9.89605	4.33061e-23	1.75e-22	28.6061	28.0328	26.7559	113.545	130.985	124.938	MSMEG_RS24625	hypothetical protein
MSMEG_2820	1044.53	2.15538	0.114376	18.8448	3.24482e-79	3.57205e-78	402.72	405.572	338.544	1823.03	1485.75	1811.59	MSMEG_RS13665	hypothetical protein
MSMEG_5914	251.594	2.15449	0.150667	14.2997	2.19779e-46	1.51792e-45	108.167	86.3592	80.2678	451.026	391.085	392.661	MSMEG_RS28505	acyl-CoA synthetase
MSMEG_0798	96.3044	2.15186	0.200413	10.7371	6.81355e-27	3.04876e-26	37.0985	38.4321	30.5782	148.239	170.281	153.197	MSMEG_RS03895	hypothetical protein
MSMEG_5366	2.61956	2.1517	1.18565	1.81479	0.0695564	0.0915504	1.78788	0.904285	0	6.30805	3.74244	2.9747	MSMEG_RS25860	hypothetical protein
MSMEG_6494	31.6112	2.14611	0.355451	6.03771	1.56315e-09	3.73893e-09	12.5152	14.4686	7.09851	63.0805	44.9093	47.5953	MSMEG_RS31325	ABC transporter permease
MSMEG_6919	3453.97	2.14581	0.0726171	29.5496	6.63867e-192	1.95435e-190	1348.96	1248.36	1222.58	5554.24	5675.41	5674.25	MSMEG_RS33340	LpqN/LpqT family lipoprotein
MSMEG_0277	8.84869	2.14522	0.635768	3.37422	0.000740254	0.00122236	4.4697	1.80857	3.27624	18.9242	11.2273	13.3862	MSMEG_RS01365	aspartate aminotransferase family protein
MSMEG_4855	30.7277	2.14333	0.350029	6.12328	9.16695e-10	2.23037e-09	11.6212	12.2078	9.28267	66.2345	37.4244	47.5953	MSMEG_RS23395	amidohydrolase family protein
MSMEG_6014	503.544	2.13434	0.1208	17.6684	7.34713e-70	7.16648e-69	212.758	178.144	167.088	873.665	810.238	779.372	MSMEG_RS28995	acyl-CoA dehydrogenase family protein
MSMEG_2240	7.66461	2.13402	0.931238	2.29159	0.0219293	0.0309752	4.91667	1.35643	2.18416	9.46208	28.0683	0	MSMEG_RS10860	cytochrome P450
MSMEG_6678	9952.91	2.13396	0.0828606	25.7537	2.93331e-146	6.07775e-145	3641.02	3432.66	4005.75	16896.1	16423.7	15318.2	MSMEG_RS32185	hypothetical protein
MSMEG_3700	24.5148	2.1315	0.398773	5.34515	9.03409e-08	1.96575e-07	10.2803	5.42571	11.4668	44.1564	43.0381	32.7217	MSMEG_RS17955	peroxidase
MSMEG_3985	358.18	2.12936	0.133349	15.9683	2.12424e-57	1.74719e-56	149.735	125.243	121.767	652.883	566.98	532.472	MSMEG_RS19305	MFS transporter
MSMEG_4655	165.345	2.12767	0.177015	12.0197	2.80057e-33	1.49349e-32	54.0834	56.9699	72.6232	302.786	275.069	230.54	MSMEG_RS22460	AraC family transcriptional regulator
MSMEG_2983	28564.3	2.1269	0.0763008	27.8752	5.32905e-171	1.35964e-169	11198.4	10630.3	10094.6	49127.1	46638.3	43696.9	MSMEG_RS14485	hypothetical protein
MSMEG_0299	15.7581	2.12555	0.471688	4.50625	6.59821e-06	1.28335e-05	5.81061	4.97357	7.09851	25.2322	18.7122	32.7217	MSMEG_RS01475	aromatic ring-hydroxylating dioxygenase subunit alpha
MSMEG_4823	14.3523	2.12499	0.500262	4.24775	2.15929e-05	4.04734e-05	5.36364	4.06928	6.55247	28.3862	14.9698	26.7723	MSMEG_RS23245	cytochrome P450
MSMEG_4063	79.9771	2.12385	0.215853	9.83933	7.62143e-23	3.0608e-22	32.6288	29.3893	26.7559	141.931	119.758	129.4	MSMEG_RS19670	amidohydrolase
MSMEG_1841	22.8043	2.122	0.435931	4.86776	1.12871e-06	2.31143e-06	12.5152	6.32999	6.00643	50.4644	24.3259	37.1838	MSMEG_RS08945	rubredoxin
MSMEG_0587	18.9728	2.12025	0.431162	4.91752	8.76493e-07	1.80401e-06	6.70455	5.87785	9.28267	25.2322	28.0683	38.6712	MSMEG_RS02850	L-rhamnose mutarotase
MSMEG_3389	290.161	2.1188	0.144586	14.6543	1.26535e-48	9.1777e-48	114.871	99.4713	108.662	558.263	406.055	453.642	MSMEG_RS16475	thiamine pyrophosphate-binding protein
MSMEG_0087	57.8172	2.11428	0.267916	7.89156	2.98432e-15	9.18449e-15	15.644	24.8678	25.1178	91.4667	84.2049	105.602	MSMEG_RS00430	DeoR/GlpR transcriptional regulator
MSMEG_5610	184.263	2.11217	0.155088	13.6191	3.0819e-42	1.98917e-41	67.9395	61.4914	78.0836	315.403	288.168	294.496	MSMEG_RS27035	helix-turn-helix transcriptional regulator
MSMEG_1009	120.443	2.11031	0.17898	11.7908	4.3558e-32	2.24022e-31	45.591	44.7621	44.2292	217.628	188.993	181.457	MSMEG_RS04920	cytochrome P450
MSMEG_4338	241.657	2.11017	0.137169	15.3838	2.10364e-53	1.62738e-52	88.9471	90.4285	93.9188	372.175	434.123	370.351	MSMEG_RS21005	class I SAM-dependent methyltransferase
MSMEG_0987	29859.7	2.10724	0.0613139	34.368	7.59025e-259	3.35933e-257	10927.5	11266.9	11552	49726.4	47936.9	47748.5	MSMEG_RS04805	hypothetical protein
MSMEG_5118	1159.2	2.10699	0.0878515	23.9835	4.13128e-127	7.18666e-126	449.205	407.832	454.305	1882.95	1809.47	1951.41	MSMEG_RS24670	NUDIX hydrolase
MSMEG_5994	114.198	2.10525	0.199001	10.5791	3.72444e-26	1.6343e-25	53.6364	39.3364	36.0386	179.779	188.993	187.406	MSMEG_RS28895	acyl-CoA/acyl-ACP dehydrogenase
MSMEG_1431	39.8817	2.1043	0.322064	6.53378	6.41312e-11	1.65636e-10	12.0682	11.7557	21.2955	72.5426	63.6215	58.0067	MSMEG_RS06995	cytochrome P450
MSMEG_1141	99.9188	2.10285	0.199833	10.523	6.767e-26	2.94292e-25	42.0152	35.2671	36.0386	164.009	142.213	179.97	MSMEG_RS05560	ABC transporter permease
MSMEG_1517	779.427	2.1005	0.0994961	21.1114	6.24724e-99	8.55675e-98	314.22	302.935	264.829	1302.61	1257.46	1234.5	MSMEG_RS07415	flotillin family protein
MSMEG_6785	638.445	2.09849	0.10699	19.6138	1.1786e-85	1.4044e-84	223.932	242.8	256.639	1125.99	950.58	1030.73	MSMEG_RS32710	L-erythrulose 1-phosphate isomerase
MSMEG_1869	199.679	2.09744	0.147124	14.2563	4.09864e-46	2.81284e-45	83.1365	72.3428	71.5312	321.711	308.751	340.604	MSMEG_RS09080	hypothetical protein
MSMEG_3719	47.8949	2.09705	0.276088	7.59559	3.06388e-14	9.10211e-14	21.0076	17.1814	15.8351	78.8506	86.0761	68.4182	MSMEG_RS18035	sodium/hydrogen exchanger
MSMEG_0680	658.432	2.09404	0.119553	17.5155	1.09077e-68	1.05447e-67	231.978	240.992	280.118	993.518	999.232	1204.76	MSMEG_RS03315	UDP-glucose/GDP-mannose dehydrogenase family protein
MSMEG_5990	75.851	2.09227	0.23697	8.82925	1.05377e-18	3.70187e-18	27.7122	29.8414	27.302	157.701	93.561	118.988	MSMEG_RS28875	lipid-transfer protein
MSMEG_0714	158.156	2.09188	0.159099	13.1483	1.74108e-39	1.06964e-38	58.1061	61.4914	60.6104	252.322	276.941	239.464	MSMEG_RS03485	acyl-CoA dehydrogenase family protein
MSMEG_1377	134.221	2.08944	0.180359	11.5848	4.91853e-31	2.46343e-30	50.0607	53.8049	49.1435	230.244	179.637	242.438	MSMEG_RS06725	DeoR/GlpR transcriptional regulator
MSMEG_3919	453.11	2.08762	0.121318	17.2078	2.32028e-66	2.17205e-65	189.962	153.276	174.187	760.12	673.639	767.474	MSMEG_RS18995	hypothetical protein
MSMEG_RS01375	124.228	2.08721	0.185427	11.2562	2.15752e-29	1.02985e-28	42.9091	46.5707	51.3277	223.936	209.577	171.045	MSMEG_RS01375	hypothetical protein
MSMEG_6846	5.3356	2.08261	0.847494	2.45737	0.0139959	0.0203389	2.23485	0.452142	3.27624	12.6161	7.48488	5.94941	MSMEG_RS33000	TRAP transporter small permease
MSMEG_4713	400.375	2.07931	0.112697	18.4504	5.17261e-76	5.44547e-75	153.758	155.989	148.523	684.424	600.662	658.897	MSMEG_RS22740	CoA ester lyase
MSMEG_6379	88.5108	2.07779	0.224615	9.25048	2.23485e-20	8.31328e-20	27.7122	37.0757	37.1307	151.393	114.144	163.609	MSMEG_RS30765	MFS transporter
MSMEG_4000	392.196	2.07677	0.113821	18.246	2.22555e-74	2.28743e-73	148.394	150.563	149.615	681.27	634.344	588.991	MSMEG_RS19385	sugar ABC transporter ATP-binding protein
MSMEG_5061	2104.55	2.07641	0.0875522	23.7162	2.45194e-124	4.19797e-123	859.971	832.846	725.686	3400.04	3471.11	3337.62	MSMEG_RS24410	extracellular solute-binding protein
MSMEG_4439	9.59106	2.07357	0.597414	3.4709	0.000518713	0.000869332	2.68182	3.61714	4.91435	15.7701	11.2273	19.3356	MSMEG_RS21455	GNAT family N-acetyltransferase
MSMEG_3528	4677.42	2.07325	0.0769606	26.9391	7.64926e-160	1.75233e-158	1927.34	1768.33	1689.99	7705.28	7636.45	7337.11	MSMEG_RS17145	L,D-transpeptidase
MSMEG_4738	285.616	2.07231	0.147408	14.0583	6.85061e-45	4.61866e-44	104.144	94.0456	132.142	451.026	484.646	447.693	MSMEG_RS22865	class I SAM-dependent methyltransferase
MSMEG_0316	490.963	2.07043	0.109009	18.9932	1.94294e-80	2.17196e-79	181.023	185.378	200.943	769.582	853.276	755.575	MSMEG_RS01555	ROK family transcriptional regulator
MSMEG_0050	406.417	2.06589	0.120729	17.1118	1.21168e-65	1.12136e-64	159.568	146.946	162.174	715.964	580.078	673.77	MSMEG_RS00240	DivIVA domain-containing protein
MSMEG_6669	68.29	2.06542	0.257413	8.02374	1.02569e-15	3.22099e-15	23.6894	30.2935	25.1178	116.699	78.5912	135.349	MSMEG_RS32150	ABC transporter permease subunit
MSMEG_5370	157.485	2.06424	0.168069	12.2821	1.13027e-34	6.2003e-34	70.6213	55.1614	55.696	268.092	239.516	255.825	MSMEG_RS25880	ectoine/hydroxyectoine ABC transporter permease subunit EhuD
MSMEG_3764	2092.29	2.06206	0.0707706	29.1373	1.21028e-186	3.42352e-185	800.971	826.064	797.218	3406.35	3401.88	3321.26	MSMEG_RS18250	Trm112 family protein
MSMEG_6718	97.4609	2.06123	0.205691	10.021	1.23248e-23	5.05262e-23	42.9091	35.2671	35.4926	135.623	185.251	150.223	MSMEG_RS32380	aromatic acid/H+ symport family MFS transporter
MSMEG_5865	69.8287	2.06053	0.25951	7.94008	2.02058e-15	6.26891e-15	34.4167	23.0593	21.8416	141.931	101.046	96.6779	MSMEG_RS28270	nuclear transport factor 2 family protein
MSMEG_1791	1492.87	2.05638	0.0846443	24.2944	2.24626e-130	4.01489e-129	622.182	548.901	566.243	2330.82	2451.3	2437.77	MSMEG_RS08705	UsfY protein
MSMEG_3757	887228	2.05598	0.133096	15.4474	7.85572e-54	6.15034e-53	342732	371365	317907	1.66655e+06	1.10632e+06	1.51849e+06	MSMEG_RS18210	16S ribosomal RNA
MSMEG_4931	886937	2.05495	0.132269	15.5361	1.97754e-54	1.5595e-53	343088	371300	317876	1.66296e+06	1.10908e+06	1.51733e+06	MSMEG_RS23770	16S ribosomal RNA
MSMEG_3999	378.02	2.05287	0.147574	13.9107	5.45143e-44	3.63391e-43	176.106	124.791	140.332	558.263	681.124	587.504	MSMEG_RS19380	substrate-binding domain-containing protein
MSMEG_4800	8.68508	2.04899	0.675548	3.03308	0.00242075	0.00381711	1.34091	2.71285	6.00643	18.9242	11.2273	11.8988	MSMEG_RS23130	SDR family oxidoreductase
MSMEG_2560	11.9601	2.04685	0.532469	3.84408	0.000121005	0.00021422	5.81061	3.165	4.91435	22.0782	14.9698	20.8229	MSMEG_RS12415	thioesterase family protein
MSMEG_1362	110.607	2.04544	0.189387	10.8003	3.43107e-27	1.54803e-26	39.7803	50.1878	39.3148	176.625	177.766	179.97	MSMEG_RS06650	hypothetical protein
MSMEG_2465	254.752	2.04408	0.139558	14.6468	1.41159e-48	1.02042e-47	99.6743	111.227	86.2742	422.639	396.699	411.997	MSMEG_RS11955	amidohydrolase family protein
MSMEG_1172	60.5532	2.04405	0.247672	8.25305	1.54404e-16	5.01274e-16	25.0303	21.2507	25.6639	85.1587	91.6898	114.526	MSMEG_RS05710	ACR3 family arsenite efflux transporter
MSMEG_4858	16.7902	2.0436	0.455053	4.4909	7.09236e-06	1.37658e-05	7.15152	7.68642	4.36832	31.5403	26.1971	23.7976	MSMEG_RS23410	TetR family transcriptional regulator
MSMEG_6778	4575.37	2.03512	0.073656	27.6301	4.839e-168	1.18355e-166	1908.12	1785.51	1689.99	7323.65	7297.76	7447.17	MSMEG_RS32675	hypothetical protein
MSMEG_2093	573381	2.03489	0.0765088	26.5968	7.38643e-156	1.64576e-154	240958	224622	209257	961959	895618	907874	MSMEG_RS10160	transfer-messenger RNA
MSMEG_3206	1309.93	2.03233	0.100626	20.1969	1.04297e-90	1.32273e-89	526.531	531.267	487.067	1964.96	2374.58	1975.2	MSMEG_RS15570	histidinol-phosphate transaminase
MSMEG_3332	579.499	2.03073	0.114043	17.8067	6.27175e-71	6.20122e-70	242.705	226.975	210.225	1012.44	956.193	828.455	MSMEG_RS16180	TetR/AcrR family transcriptional regulator C-terminal domain-containing protein
MSMEG_4090	699.861	2.02904	0.133884	15.1552	7.00425e-52	5.30497e-51	328.523	246.87	248.448	1242.69	1006.72	1125.93	MSMEG_RS19790	IclR family transcriptional regulator
MSMEG_5574	315.557	2.02768	0.129293	15.6829	1.98115e-55	1.58932e-54	137.22	121.174	112.484	533.03	516.457	472.978	MSMEG_RS26865	sugar ABC transporter substrate-binding protein
MSMEG_3053	1442.67	2.02507	0.0816269	24.8089	7.18275e-136	1.3664e-134	561.395	585.072	561.875	2299.28	2206.17	2442.23	MSMEG_RS14825	DNA-directed RNA polymerase subunit omega
MSMEG_5877	541.159	2.02394	0.110066	18.3883	1.62863e-75	1.70901e-74	229.743	197.586	214.594	854.741	817.723	932.57	MSMEG_RS28330	cellulase family glycosylhydrolase
MSMEG_5144	246.214	2.02321	0.133221	15.1868	4.3232e-52	3.27817e-51	102.803	91.7849	96.1029	416.331	376.115	394.148	MSMEG_RS24805	glycoside hydrolase family 3 C-terminal domain-containing protein
MSMEG_5863	109.048	2.0229	0.192837	10.4902	9.58287e-26	4.13711e-25	45.591	37.5278	44.7752	201.858	160.925	163.609	MSMEG_RS28260	cytochrome P450
MSMEG_2531	19.1203	2.02278	0.45522	4.44352	8.84992e-06	1.70348e-05	6.25758	5.42571	10.3747	44.1564	26.1971	22.3103	MSMEG_RS12275	GntR family transcriptional regulator
MSMEG_2239	11.6944	2.02268	0.534226	3.78619	0.000152976	0.000268481	4.4697	3.61714	6.00643	15.7701	22.4546	17.8482	MSMEG_RS10855	TetR family transcriptional regulator
MSMEG_2036	595.966	2.02231	0.114559	17.653	9.64643e-70	9.39516e-69	217.674	238.731	246.81	1056.6	971.163	844.816	MSMEG_RS09875	alpha/beta hydrolase
MSMEG_6344	473.649	2.02091	0.106611	18.9558	3.95256e-80	4.38829e-79	194.432	175.431	191.66	779.044	727.905	773.423	MSMEG_RS30600	helix-turn-helix transcriptional regulator
MSMEG_5794	3784.53	2.01895	0.0805718	25.0578	1.43558e-138	2.83027e-137	1456.68	1430.58	1610.82	5749.79	6328.47	6130.87	MSMEG_RS27925	hypothetical protein
MSMEG_0512	40.8314	2.0189	0.324975	6.21249	5.21529e-10	1.28769e-09	15.644	17.6336	14.197	88.3127	39.2956	69.9055	MSMEG_RS02490	N-acetylglucosamine kinase
MSMEG_5814	49.773	2.01873	0.277942	7.26315	3.78182e-13	1.07209e-12	19.2197	15.3728	24.5718	82.0047	86.0761	71.3929	MSMEG_RS28015	carboxymuconolactone decarboxylase family protein
MSMEG_3584	36.6038	2.01799	0.320327	6.29978	2.98072e-10	7.44435e-10	15.197	14.0164	13.1049	78.8506	44.9093	53.5447	MSMEG_RS17410	RND family transporter
MSMEG_4078	237.604	2.01604	0.141191	14.2788	2.9654e-46	2.04374e-45	96.9925	97.2106	85.7282	422.639	377.986	345.066	MSMEG_RS19735	MFS transporter
MSMEG_4843	16.4113	2.01427	0.447724	4.4989	6.83051e-06	1.32655e-05	6.25758	7.23428	6.00643	25.2322	29.9395	23.7976	MSMEG_RS23340	nuclear transport factor 2 family protein
MSMEG_2493	97.5298	2.01311	0.205724	9.78549	1.29968e-22	5.1812e-22	35.7576	42.5014	36.0386	189.242	140.342	141.298	MSMEG_RS12090	PLP-dependent aminotransferase family protein
MSMEG_4720	1627.93	2.00713	0.0802154	25.0217	3.54937e-138	6.97649e-137	614.137	650.633	682.549	2564.22	2681.46	2574.61	MSMEG_RS22775	membrane protein
MSMEG_3975	203.083	2.00522	0.189126	10.6026	2.899e-26	1.27611e-25	85.3713	67.3692	87.3663	410.023	319.979	248.388	MSMEG_RS19250	PucR family transcriptional regulator
MSMEG_5338	98.0754	2.00148	0.197251	10.1468	3.42306e-24	1.42394e-23	43.8031	36.1714	38.2228	141.931	172.152	156.172	MSMEG_RS25725	MarR family transcriptional regulator
MSMEG_4170	49.9168	1.99938	0.265477	7.53126	5.02548e-14	1.47744e-13	17.8788	21.2507	20.2035	88.3127	80.4625	71.3929	MSMEG_RS20175	sugar ABC transporter ATP-binding protein
MSMEG_2199	478.48	1.99726	0.108073	18.4807	2.95273e-76	3.11859e-75	205.159	192.613	177.463	750.658	752.23	792.759	MSMEG_RS10670	hypothetical protein
MSMEG_2495	159.154	1.9963	0.158243	12.6154	1.73636e-36	1.0006e-35	64.3637	67.3692	58.4262	271.246	245.13	248.388	MSMEG_RS12100	Asp/Glu/hydantoin racemase
MSMEG_0077	157.544	1.99393	0.211245	9.43891	3.76686e-21	1.43485e-20	81.7955	63.7521	42.5911	274.4	243.259	239.464	MSMEG_RS00380	ESX-1 secretion-associated protein
MSMEG_4059	389.194	1.99334	0.124783	15.9745	1.92294e-57	1.58363e-56	167.614	159.606	138.148	687.578	600.662	581.555	MSMEG_RS19650	HAD family hydrolase
MSMEG_6122	14.9289	1.99299	0.505836	3.94	8.14821e-05	0.000146169	6.70455	7.23428	3.27624	34.6943	16.841	20.8229	MSMEG_RS29535	ABC transporter permease
MSMEG_6144	175.218	1.99113	0.17893	11.128	9.1659e-29	4.28708e-28	85.3713	70.9863	54.0579	287.016	263.842	290.034	MSMEG_RS29645	PE-PPE domain-containing protein
MSMEG_0164	8.77088	1.98868	0.644792	3.08421	0.00204091	0.0032457	4.02273	2.71285	3.27624	22.0782	13.0985	7.43676	MSMEG_RS00810	OFA family MFS transporter
MSMEG_2005	28.3629	1.9873	0.343816	5.78012	7.46453e-09	1.72214e-08	12.0682	12.2078	9.82871	47.3104	41.1668	47.5953	MSMEG_RS09725	sugar phosphate isomerase/epimerase
MSMEG_5371	131.086	1.98723	0.195237	10.1785	2.47296e-24	1.03201e-23	52.2955	61.0392	42.5911	252.322	190.864	187.406	MSMEG_RS25885	ectoine/hydroxyectoine ABC transporter ATP-binding protein EhuA
MSMEG_3091	65.3531	1.98699	0.263786	7.53259	4.97433e-14	1.46306e-13	33.0758	28.485	17.4733	91.4667	116.016	105.602	MSMEG_RS15015	sugar ABC transporter ATP-binding protein
MSMEG_1142	77.1266	1.98687	0.231781	8.57217	1.01554e-17	3.43405e-17	35.3106	25.7721	32.7624	119.853	104.788	144.273	MSMEG_RS05565	ABC transporter permease
MSMEG_3210	358.648	1.98634	0.119626	16.6046	6.45645e-62	5.73065e-61	146.159	143.781	140.878	637.113	527.684	556.27	MSMEG_RS15590	inositol monophosphatase
MSMEG_2235	31.902	1.98617	0.325206	6.10742	1.01254e-09	2.45531e-09	11.6212	12.2078	14.7431	53.6184	48.6517	50.57	MSMEG_RS10835	amidohydrolase family protein
MSMEG_4807	27.9765	1.98417	0.397377	4.99317	5.93956e-07	1.23262e-06	6.70455	9.94713	17.4733	44.1564	52.3942	37.1838	MSMEG_RS23165	amidohydrolase
MSMEG_3402	176.732	1.98056	0.189563	10.448	1.49623e-25	6.42962e-25	81.7955	76.8642	54.0579	318.557	230.16	298.958	MSMEG_RS16545	cytosine permease
MSMEG_3421	94.9606	1.979	0.247303	8.00234	1.22072e-15	3.8238e-15	42.9091	43.4057	26.7559	186.088	159.054	111.551	MSMEG_RS16640	MHS family MFS transporter
MSMEG_0528	41.1927	1.96977	0.332774	5.91925	3.23422e-09	7.62662e-09	12.9621	22.6071	13.651	78.8506	72.9776	46.1079	MSMEG_RS02565	TIGR03564 family F420-dependent LLM class oxidoreductase
MSMEG_6529	11.2845	1.96691	0.605216	3.24994	0.0011543	0.001877	5.81061	4.97357	3.82228	3.15403	18.7122	31.2344	MSMEG_RS31490	hypothetical protein
MSMEG_3208	716.585	1.96444	0.10079	19.4903	1.32638e-84	1.55766e-83	290.531	295.249	286.671	1264.76	1107.76	1054.53	MSMEG_RS15580	imidazole glycerol phosphate synthase subunit HisH
MSMEG_2166	18.2601	1.96414	0.547883	3.58495	0.000337137	0.000573741	1.78788	10.8514	9.28267	41.0023	24.3259	22.3103	MSMEG_RS10505	transketolase
MSMEG_2218	7.25044	1.96365	0.683406	2.87332	0.00406177	0.00626651	2.23485	2.26071	4.36832	12.6161	13.0985	8.92411	MSMEG_RS10765	enoyl-CoA hydratase/isomerase family protein
MSMEG_4171	35.2103	1.96292	0.319082	6.15177	7.66206e-10	1.87333e-09	13.8561	13.5643	15.2891	59.9265	65.4927	43.1332	MSMEG_RS20180	ribonucleotide-diphosphate reductase subunit alpha
MSMEG_4611	96.3776	1.96073	0.236931	8.27554	1.2787e-16	4.16377e-16	47.3788	32.5542	37.1307	186.088	108.531	166.583	MSMEG_RS22250	SLC13 family permease
MSMEG_1588	18.6265	1.96036	0.420411	4.66296	3.11698e-06	6.20156e-06	8.49243	7.68642	7.09851	22.0782	33.682	32.7217	MSMEG_RS07755	hypothetical protein
MSMEG_2453	399.637	1.95913	0.123658	15.8432	1.56704e-56	1.27599e-55	170.296	171.362	151.799	548.8	669.897	685.669	MSMEG_RS11895	GntR family transcriptional regulator
MSMEG_RS30775	147.152	1.95636	0.180332	10.8486	2.02415e-27	9.17069e-27	73.3031	51.5442	56.7881	214.474	241.387	245.413	MSMEG_RS30775	hypothetical protein
MSMEG_2289	111.813	1.95417	0.204755	9.54395	1.37498e-21	5.31212e-21	58.1061	41.145	37.6767	182.933	174.023	176.995	MSMEG_RS11090	cytochrome P450
MSMEG_3792	963.045	1.95226	0.103706	18.825	4.71287e-79	5.17064e-78	428.197	363.07	391.51	1687.4	1437.1	1470.99	MSMEG_RS18385	50S ribosomal protein L35
MSMEG_2890	0.645636	1.95033	2.25415	0.865216	0.38692	0.439473	0.44697	0.452142	0	0	0	2.9747	MSMEG_RS14020	IclR family transcriptional regulator
MSMEG_2758	5432.64	1.95	0.0802855	24.2883	2.60811e-130	4.64886e-129	2161.1	2218.66	2316.85	9373.76	8422.36	8103.09	MSMEG_RS13365	RNA polymerase sigma factor
MSMEG_0343	63.8314	1.94848	0.236302	8.24572	1.64165e-16	5.32167e-16	24.5834	27.1285	26.2099	116.699	91.6898	96.6779	MSMEG_RS01690	TetR/AcrR family transcriptional regulator
MSMEG_0178	29.4814	1.94764	0.439712	4.42936	9.45145e-06	1.81497e-05	12.5152	14.0164	8.73663	75.6966	16.841	49.0826	MSMEG_RS00875	amino acid ABC transporter ATP-binding protein
MSMEG_4504	2062.36	1.94537	0.0908343	21.4166	9.35157e-102	1.31977e-100	808.569	831.038	907.518	3526.2	3300.83	2999.99	MSMEG_RS21750	molecular chaperone DnaJ
MSMEG_4505	2095.1	1.94361	0.0895955	21.6931	2.38222e-104	3.46727e-103	829.577	816.569	945.74	3494.66	3345.74	3138.31	MSMEG_RS21755	heat-inducible transcriptional repressor HrcA
MSMEG_6677	1363.79	1.94357	0.101729	19.1054	2.27664e-81	2.58947e-80	545.304	519.964	621.393	2277.21	2251.08	1967.77	MSMEG_RS32190	LysR family transcriptional regulator
MSMEG_1119	60.7003	1.9432	0.248203	7.82907	4.91489e-15	1.50194e-14	27.2652	26.2243	22.9337	72.5426	106.66	108.577	MSMEG_RS05450	gamma-glutamyl-gamma-aminobutyrate hydrolase family protein
MSMEG_3401	127.725	1.9428	0.202949	9.57287	1.03983e-21	4.03168e-21	55.4243	64.2042	37.6767	205.012	207.705	196.33	MSMEG_RS16540	5-oxoprolinase subunit PxpA
MSMEG_6636	403.408	1.9427	0.134442	14.4501	2.50303e-47	1.76051e-46	189.515	153.728	152.891	731.734	593.177	599.403	MSMEG_RS32000	superoxide dismutase
MSMEG_1367	16682.8	1.93806	0.0649811	29.825	1.85374e-195	5.55781e-194	7041.12	6624.34	7052.1	26323.5	25791	27264.7	MSMEG_RS06675	DNA-directed RNA polymerase subunit beta
MSMEG_5909	64.4561	1.93684	0.269922	7.17557	7.20068e-13	2.0254e-12	29.5	30.7457	21.2955	72.5426	97.3034	135.349	MSMEG_RS28480	NAD-dependent epimerase/dehydratase family protein
MSMEG_4174	22.8576	1.93401	0.377396	5.1246	2.98168e-07	6.29422e-07	9.83334	9.49499	9.28267	34.6943	33.682	40.1585	MSMEG_RS20195	IclR family transcriptional regulator
MSMEG_6762	125.285	1.93146	0.172056	11.2258	3.04784e-29	1.44845e-28	55.4243	50.6399	50.2356	195.55	194.607	205.255	MSMEG_RS32595	winged helix-turn-helix transcriptional regulator
MSMEG_1161	33.6513	1.93129	0.33811	5.71202	1.11644e-08	2.55399e-08	17.8788	12.66	10.3747	66.2345	48.6517	46.1079	MSMEG_RS05660	ABC transporter permease
MSMEG_5564	96.4389	1.93112	0.206121	9.36888	7.3303e-21	2.7679e-20	42.4622	33.9107	42.5911	173.471	155.311	130.887	MSMEG_RS26815	NAD(P)H-dependent oxidoreductase
MSMEG_2112	3054.91	1.92938	0.102294	18.8611	2.38113e-79	2.6257e-78	1167.04	1203.6	1439.36	5232.53	4494.67	4792.25	MSMEG_RS10255	hypothetical protein
MSMEG_6903	7329.78	1.92878	0.0713016	27.051	3.71753e-161	8.63795e-160	3240.53	2970.12	2934.42	11938	11466.8	11428.8	MSMEG_RS33285	helix-turn-helix transcriptional regulator
MSMEG_0510	54.9035	1.92625	0.25725	7.48786	7.00065e-14	2.04243e-13	24.5834	21.7028	21.2955	104.083	72.9776	84.7791	MSMEG_RS02480	D-tagatose-bisphosphate aldolase, class II, non-catalytic subunit
MSMEG_0841	181.853	1.92587	0.18386	10.4746	1.12965e-25	4.864e-25	96.0986	64.6564	67.7089	255.476	284.425	322.755	MSMEG_RS04100	hypothetical protein
MSMEG_1975	128.693	1.92565	0.185204	10.3974	2.54693e-25	1.08944e-24	60.341	54.2571	46.9594	176.625	237.645	196.33	MSMEG_RS09585	amidohydrolase
MSMEG_5138	47.7003	1.92331	0.300723	6.39561	1.59904e-10	4.05115e-10	18.7727	13.5643	27.848	75.6966	72.9776	77.3423	MSMEG_RS24775	nitrate reductase molybdenum cofactor assembly chaperone
MSMEG_0088	107.283	1.9223	0.185556	10.3597	3.78118e-25	1.60787e-24	43.3561	43.4057	46.9594	179.779	174.023	156.172	MSMEG_RS00435	phosphoenolpyruvate--protein phosphotransferase
MSMEG_1187	610.118	1.92118	0.124528	15.4277	1.06622e-53	8.31754e-53	230.19	279.876	255	987.21	834.564	1073.87	MSMEG_RS05785	D-aminoacylase
MSMEG_5567	131.162	1.92072	0.1931	9.94678	2.60478e-23	1.05719e-22	59.894	43.4057	59.5183	242.86	198.349	182.944	MSMEG_RS26830	TetR/AcrR family transcriptional regulator
MSMEG_6788	995.048	1.92009	0.086458	22.2083	2.85574e-109	4.3923e-108	414.341	406.476	424.273	1671.63	1508.2	1545.36	MSMEG_RS32720	L-erythrulose 1-kinase
MSMEG_4774	9.16946	1.91977	0.632547	3.03499	0.00240546	0.00379576	4.02273	1.80857	6.00643	12.6161	11.2273	19.3356	MSMEG_RS23005	AMP-binding protein
MSMEG_5142	89.9059	1.91919	0.21381	8.97613	2.80457e-19	1.01089e-18	36.2046	38.8842	35.4926	176.625	134.728	117.501	MSMEG_RS24795	beta-glucosidase
MSMEG_3727	55.4138	1.91768	0.254871	7.52411	5.30811e-14	1.55701e-13	25.0303	25.7721	18.5653	85.1587	91.6898	86.2664	MSMEG_RS18075	multicopper oxidase
MSMEG_1429	84.7731	1.91113	0.215934	8.85052	8.71091e-19	3.07005e-18	36.2046	31.1978	40.953	110.391	151.569	138.324	MSMEG_RS06990	cytochrome P450
MSMEG_0055	651.386	1.91065	0.130167	14.6785	8.85395e-49	6.44338e-48	309.75	256.365	254.454	1072.37	870.117	1145.26	MSMEG_RS00265	type VII secretion system ESX-1 associated protein EspE
MSMEG_1344	1894.66	1.90971	0.0795385	24.0099	2.19359e-127	3.82613e-126	809.91	775.424	800.494	3135.1	3046.35	2800.68	MSMEG_RS06560	preprotein translocase subunit SecE
MSMEG_2237	27.4118	1.90851	0.36575	5.21807	1.80797e-07	3.86295e-07	8.9394	14.0164	12.0129	34.6943	56.1366	38.6712	MSMEG_RS10845	molybdopterin-dependent oxidoreductase
MSMEG_6904	12279.8	1.90777	0.0574091	33.2311	3.82843e-242	1.55673e-240	5179.94	5145.38	5179.73	19223.8	19470	19479.8	MSMEG_RS33290	inositol-3-phosphate synthase
MSMEG_5369	170.226	1.90773	0.191008	9.98771	1.72523e-23	7.03723e-23	87.1592	75.9599	50.7817	274.4	263.842	269.211	MSMEG_RS25875	ectoine/hydroxyectoine ABC transporter permease subunit EhuC
MSMEG_3788	29.4698	1.906	0.399795	4.76743	1.86589e-06	3.77588e-06	13.8561	17.1814	6.55247	37.8483	37.4244	63.9561	MSMEG_RS18365	bifunctional 4-hydroxy-2-oxoglutarate aldolase/2-dehydro-3-deoxy-phosphogluconate aldolase
MSMEG_5302	5068.37	1.89817	0.0968813	19.5927	1.78369e-85	2.11765e-84	2272.4	2307.28	1853.26	7667.44	8255.82	8054.01	MSMEG_RS25550	cation:dicarboxylase symporter family transporter
MSMEG_5922	172.023	1.89652	0.150708	12.5841	2.58222e-36	1.48147e-35	74.644	74.6035	68.801	271.246	282.554	260.287	MSMEG_RS28545	thiolase domain-containing protein
MSMEG_5862	52.0514	1.8962	0.266772	7.10796	1.1777e-12	3.28425e-12	23.2424	24.4157	18.5653	72.5426	99.1747	74.3676	MSMEG_RS28255	SDR family oxidoreductase
MSMEG_3205	1768.71	1.8958	0.0747274	25.3696	5.46342e-142	1.09707e-140	769.236	749.2	731.147	2693.54	2853.61	2815.56	MSMEG_RS15565	histidinol dehydrogenase
MSMEG_4493	663.9	1.89565	0.092768	20.4343	8.28191e-93	1.07764e-91	289.637	277.615	275.204	1075.52	1019.81	1045.61	MSMEG_RS21710	GTPase Era
MSMEG_1535	44.6131	1.89544	0.301973	6.27685	3.45491e-10	8.60225e-10	16.0909	15.825	24.5718	75.6966	80.4625	55.032	MSMEG_RS07505	type VII secretion integral membrane protein EccD
MSMEG_6579	2141.84	1.89167	0.0995424	19.0037	1.58966e-80	1.78624e-79	896.622	828.777	1005.8	3283.34	3164.23	3672.27	MSMEG_RS31720	hemophore-related protein
MSMEG_0364	339.935	1.88905	0.150642	12.54	4.5117e-36	2.56583e-35	143.03	150.563	141.97	504.644	443.479	655.922	MSMEG_RS01795	hypothetical protein
MSMEG_4141	288.255	1.88496	0.140026	13.4615	2.63404e-41	1.66865e-40	138.561	118.913	113.03	406.869	443.479	508.674	MSMEG_RS20035	LLM class F420-dependent oxidoreductase
MSMEG_4407	13.2869	1.88465	0.518235	3.63666	0.000276197	0.00047375	4.4697	5.87785	7.09851	12.6161	31.8107	17.8482	MSMEG_RS21315	hypothetical protein
MSMEG_0200	133.639	1.88375	0.198114	9.50843	1.93552e-21	7.44239e-21	56.3182	50.1878	61.7025	274.4	177.766	181.457	MSMEG_RS00985	ATPase AAA
MSMEG_4734	179.197	1.88371	0.148712	12.6668	9.03036e-37	5.23166e-36	77.7728	71.8906	80.2678	277.554	273.198	294.496	MSMEG_RS22845	PE-PPE domain-containing protein
MSMEG_4494	159.168	1.88335	0.173007	10.886	1.34475e-27	6.13532e-27	74.197	68.7256	57.8802	296.478	230.16	227.565	MSMEG_RS21715	hypothetical protein
MSMEG_2257	79.969	1.88216	0.247071	7.61789	2.57865e-14	7.69219e-14	42.4622	36.6235	24.0257	104.083	125.372	147.248	MSMEG_RS10935	cytochrome P450
MSMEG_3549	17.0199	1.87785	0.453558	4.14026	3.46918e-05	6.41571e-05	8.9394	6.78213	6.55247	22.0782	20.5834	37.1838	MSMEG_RS17240	ectoine/hydroxyectoine ABC transporter permease subunit EhuD
MSMEG_5346	38.6429	1.87587	0.300435	6.24385	4.26942e-10	1.06059e-09	17.4318	18.99	13.651	50.4644	67.3639	63.9561	MSMEG_RS25765	TetR family transcriptional regulator
MSMEG_3054	1636.52	1.87582	0.093568	20.0477	2.11437e-89	2.64541e-88	665.539	665.101	775.376	2485.37	2499.95	2727.8	MSMEG_RS14830	bifunctional phosphopantothenoylcysteine decarboxylase/phosphopantothenate--cysteine ligase CoaBC
MSMEG_1859	11.9102	1.87569	0.528643	3.54812	0.00038799	0.000657532	4.91667	4.52142	5.46039	25.2322	14.9698	16.3609	MSMEG_RS09040	hypothetical protein
MSMEG_0696	400.635	1.87431	0.109019	17.1925	3.01992e-66	2.81888e-65	169.849	178.596	167.634	605.573	645.571	636.587	MSMEG_RS03395	DUF3618 domain-containing protein
MSMEG_5573	187.472	1.86783	0.152461	12.2512	1.65563e-34	9.05172e-34	85.3713	80.4813	73.7153	324.865	295.653	264.749	MSMEG_RS26860	sugar ABC transporter permease
MSMEG_5091	276.274	1.86766	0.158498	11.7835	4.74665e-32	2.43546e-31	134.091	106.253	114.122	501.49	348.047	453.642	MSMEG_RS24560	hypothetical protein
MSMEG_5572	188.948	1.86711	0.153528	12.1614	4.99064e-34	2.70802e-33	77.3258	83.6463	80.2678	340.635	290.039	261.774	MSMEG_RS26855	carbohydrate ABC transporter permease
MSMEG_4709	801.231	1.86402	0.098257	18.9709	2.96742e-80	3.30582e-79	339.25	356.74	344.551	1122.83	1309.85	1334.15	MSMEG_RS22720	enoyl-CoA hydratase
MSMEG_0123	7.69815	1.86093	0.67029	2.77631	0.00549803	0.00837905	3.57576	2.71285	3.82228	12.6161	5.61366	17.8482	MSMEG_RS00605	tripartite tricarboxylate transporter TctB family protein
MSMEG_1117	139.607	1.85926	0.202096	9.19988	3.5835e-20	1.32467e-19	76.4319	58.7785	45.3213	220.782	198.349	237.976	MSMEG_RS05440	FadR family transcriptional regulator
MSMEG_1856	62.4583	1.85806	0.234766	7.91453	2.4819e-15	7.65634e-15	25.4773	28.9371	26.7559	97.7748	91.6898	104.115	MSMEG_RS09025	hypothetical protein
MSMEG_4032	29.2299	1.85691	0.335247	5.53895	3.04297e-08	6.78e-08	12.5152	13.1121	12.0129	50.4644	41.1668	46.1079	MSMEG_RS19530	NADP-dependent oxidoreductase
MSMEG_6625	9.4219	1.8548	0.613118	3.0252	0.00248469	0.00391414	5.36364	3.61714	2.7302	22.0782	9.3561	13.3862	MSMEG_RS31945	VOC family protein
MSMEG_4610	96.7433	1.85101	0.201954	9.16551	4.93152e-20	1.81679e-19	40.6743	42.5014	43.1371	138.777	181.508	133.862	MSMEG_RS22245	igiC
MSMEG_5109	566.903	1.8499	0.136362	13.5661	6.3586e-42	4.06776e-41	298.129	236.018	203.673	883.127	885.087	895.386	MSMEG_RS24635	MBL fold metallo-hydrolase
MSMEG_2847	9.55785	1.84799	0.614575	3.00694	0.00263894	0.00414409	5.36364	1.80857	5.46039	12.6161	18.7122	13.3862	MSMEG_RS13805	ABC transporter substrate-binding protein
MSMEG_4869	1.30692	1.84465	1.6328	1.12975	0.258581	0.30549	0.89394	0.452142	0.546039	0	0	5.94941	MSMEG_RS23470	methylmalonyl Co-A mutase-associated GTPase MeaB
MSMEG_2549	52.5335	1.84282	0.271415	6.78966	1.12396e-11	2.99691e-11	28.6061	20.3464	20.7495	63.0805	91.6898	90.7285	MSMEG_RS12365	MFS transporter
MSMEG_2102	16.6138	1.84183	0.474012	3.88563	0.000102067	0.000181632	7.59849	5.42571	9.28267	15.7701	39.2956	22.3103	MSMEG_RS10205	ABC transporter ATP-binding protein
MSMEG_3090	46.3669	1.84137	0.28105	6.55176	5.68617e-11	1.47211e-10	21.9015	20.3464	19.1114	66.2345	59.879	90.7285	MSMEG_RS15010	ABC transporter permease
MSMEG_4740	47.3594	1.83981	0.287254	6.40484	1.50531e-10	3.82112e-10	26.3712	17.1814	18.0193	82.0047	61.7503	78.8297	MSMEG_RS22875	glycosyltransferase
MSMEG_5179	84.7759	1.83934	0.21573	8.52616	1.51292e-17	5.08423e-17	42.9091	31.65	37.6767	116.699	130.985	148.735	MSMEG_RS24975	DoxX family protein
MSMEG_6490	24.7294	1.83764	0.368124	4.99191	5.97842e-07	1.24029e-06	9.38637	10.8514	12.0129	44.1564	31.8107	40.1585	MSMEG_RS31305	MFS transporter
MSMEG_1561	791.657	1.83711	0.0952154	19.2942	6.00344e-83	6.93754e-82	329.864	345.889	359.84	1327.84	1221.91	1164.6	MSMEG_RS07640	LysR family transcriptional regulator
MSMEG_6469	17.5505	1.83464	0.463284	3.96008	7.49232e-05	0.000134804	9.38637	6.78213	6.00643	41.0023	16.841	25.285	MSMEG_RS31200	DUF427 domain-containing protein
MSMEG_3393	361.503	1.83317	0.125622	14.5927	3.12399e-48	2.24582e-47	167.167	160.058	145.793	618.189	497.745	580.067	MSMEG_RS16495	acyl-CoA/acyl-ACP dehydrogenase
MSMEG_4442	34.5339	1.83278	0.309449	5.92272	3.16652e-09	7.46969e-09	16.5379	13.5643	15.2891	53.6184	56.1366	52.0573	MSMEG_RS21470	NADP-dependent oxidoreductase
MSMEG_2070	620.462	1.82748	0.0990913	18.4424	6.00662e-76	6.31326e-75	256.561	276.259	283.941	1021.9	926.254	957.855	MSMEG_RS10050	acyl-CoA dehydrogenase family protein
MSMEG_2491	60.4955	1.82556	0.263784	6.92069	4.49463e-12	1.22557e-11	23.6894	23.0593	31.6703	123.007	84.2049	77.3423	MSMEG_RS12085	M20 family metallopeptidase
MSMEG_0433	100.265	1.82477	0.212161	8.60087	7.91165e-18	2.69352e-17	48.7197	39.7885	45.3213	141.931	130.985	194.843	MSMEG_RS02120	MFS transporter
MSMEG_1777	2468.5	1.82262	0.0919092	19.8306	1.62094e-87	1.9823e-86	1085.69	1010.54	1164.16	4216.93	3630.17	3703.51	MSMEG_RS08640	UsfY protein
MSMEG_0667	198.073	1.82242	0.186765	9.75787	1.70709e-22	6.78869e-22	87.1592	90.4285	80.8138	406.869	230.16	293.008	MSMEG_RS03250	acyl-CoA/acyl-ACP dehydrogenase
MSMEG_5101	1660.09	1.82184	0.0776822	23.4525	1.24734e-121	2.08082e-120	748.675	730.21	718.588	2501.14	2724.5	2537.42	MSMEG_RS24590	ESX-1 secretion-associated protein
MSMEG_4882	19.4504	1.82086	0.422406	4.31067	1.62758e-05	3.07464e-05	5.81061	10.3993	9.82871	28.3862	28.0683	34.2091	MSMEG_RS23530	NAD(P)-dependent oxidoreductase
MSMEG_6717	230.018	1.82051	0.145836	12.4833	9.20994e-36	5.20138e-35	109.061	86.8113	107.57	381.637	357.403	337.629	MSMEG_RS32375	Gfo/Idh/MocA family oxidoreductase
MSMEG_RS11355	360.068	1.81979	0.171019	10.6409	1.92341e-26	8.53013e-26	128.727	138.808	210.225	574.033	546.396	562.219	MSMEG_RS11355	lycopene cyclase domain-containing protein
MSMEG_0276	10.2336	1.81942	0.556383	3.27008	0.00107517	0.00175227	4.91667	4.97357	3.82228	12.6161	18.7122	16.3609	MSMEG_RS01360	aldehyde dehydrogenase family protein
MSMEG_4626	870.346	1.81886	0.0892543	20.3785	2.59733e-92	3.37289e-91	367.409	398.79	386.596	1356.23	1407.16	1305.9	MSMEG_RS22325	ribonuclease E/G
MSMEG_5089	1370.42	1.81823	0.11745	15.4808	4.67614e-54	3.67871e-53	700.402	601.349	511.639	2277.21	2030.27	2101.63	MSMEG_RS33680	hypothetical protein
MSMEG_4457	20.2874	1.81817	0.444281	4.09239	4.26952e-05	7.84011e-05	6.70455	11.7557	8.73663	22.0782	48.6517	23.7976	MSMEG_RS21535	Lrp/AsnC family transcriptional regulator
MSMEG_6797	11.992	1.81815	0.546491	3.32696	0.000877986	0.0014432	4.91667	5.87785	6.00643	6.30805	20.5834	28.2597	MSMEG_RS32765	carboxymuconolactone decarboxylase family protein
MSMEG_3432	60.3224	1.81795	0.242386	7.50025	6.36968e-14	1.86085e-13	25.4773	30.2935	24.0257	91.4667	102.917	87.7538	MSMEG_RS16700	choline dehydrogenase
MSMEG_6652	7.22822	1.81742	0.776504	2.34052	0.019257	0.027468	4.4697	1.80857	2.7302	22.0782	1.87122	10.4115	MSMEG_RS32065	hypothetical protein
MSMEG_1712	116.504	1.81686	0.200763	9.04978	1.43259e-19	5.21809e-19	56.3182	59.2306	39.8609	154.547	192.736	196.33	MSMEG_RS08355	ABC transporter substrate-binding protein
MSMEG_2241	12.6127	1.81564	0.511759	3.54784	0.000388407	0.000658067	5.36364	5.87785	5.46039	22.0782	13.0985	23.7976	MSMEG_RS10870	acyl-CoA synthetase
MSMEG_5996	437.341	1.81562	0.11893	15.2662	1.28357e-52	9.83617e-52	207.841	178.596	190.568	756.966	662.412	627.663	MSMEG_RS28905	steroid 3-ketoacyl-CoA thiolase
MSMEG_2243	4.20601	1.81499	0.891727	2.03537	0.0418137	0.0569121	2.23485	2.71285	0.546039	6.30805	7.48488	5.94941	MSMEG_RS10875	cysteine hydrolase
MSMEG_4541	18.3987	1.81326	0.432913	4.18851	2.80786e-05	5.22838e-05	6.25758	10.8514	7.64455	25.2322	26.1971	34.2091	MSMEG_RS21925	ABC transporter ATP-binding protein
MSMEG_4972	145.68	1.81269	0.16847	10.7598	5.33126e-27	2.39208e-26	64.3637	61.9435	64.9787	264.938	217.062	200.793	MSMEG_RS23970	GNAT family N-acetyltransferase
MSMEG_2466	178.614	1.81239	0.189893	9.54426	1.37079e-21	5.29907e-21	68.8334	101.732	68.2549	242.86	273.198	316.806	MSMEG_RS11960	glutaryl-CoA dehydrogenase
MSMEG_2981	19.5453	1.81019	0.412849	4.38463	1.16181e-05	2.21405e-05	8.49243	8.13856	9.28267	34.6943	22.4546	34.2091	MSMEG_RS14475	urea ABC transporter permease subunit UrtB
MSMEG_2980	30.6806	1.80926	0.336047	5.38396	7.28666e-08	1.58977e-07	15.644	14.4686	11.4668	34.6943	54.2654	53.5447	MSMEG_RS14470	urea ABC transporter permease subunit UrtC
MSMEG_2567	34.946	1.80681	0.333176	5.42299	5.86103e-08	1.28737e-07	12.0682	15.825	19.6574	47.3104	44.9093	69.9055	MSMEG_RS12450	NAD(P)-binding domain-containing protein
MSMEG_5060	591.028	1.80548	0.109411	16.5017	3.56474e-61	3.12985e-60	272.205	278.972	240.257	829.509	959.936	965.291	MSMEG_RS24405	sugar ABC transporter permease
MSMEG_5984	22.1513	1.80183	0.401366	4.48925	7.14738e-06	1.38684e-05	7.15152	9.49499	13.651	28.3862	35.5532	38.6712	MSMEG_RS28845	sugar transferase
MSMEG_3390	89.1533	1.79764	0.226697	7.92969	2.1969e-15	6.79974e-15	50.9546	34.815	33.8544	135.623	123.501	156.172	MSMEG_RS16480	crotonase/enoyl-CoA hydratase family protein
MSMEG_3529	1382.89	1.79521	0.0762883	23.5319	1.92174e-122	3.23907e-121	632.016	614.009	608.288	2179.43	2157.52	2106.09	MSMEG_RS17140	sterol desaturase family protein
MSMEG_3586	23.3557	1.7943	0.419885	4.27331	1.92596e-05	3.62043e-05	7.15152	14.9207	8.73663	41.0023	43.0381	25.285	MSMEG_RS17420	MHS family MFS transporter
MSMEG_4617	725.836	1.79317	0.0958725	18.7037	4.61552e-78	5.00476e-77	340.591	331.872	300.322	1160.68	1128.35	1093.2	MSMEG_RS22280	NAD(+) synthase
MSMEG_5973	5.27024	1.79302	0.818129	2.19161	0.0284075	0.0395928	2.68182	1.80857	2.18416	12.6161	9.3561	2.9747	MSMEG_RS28795	hypothetical protein
MSMEG_5620	7.44576	1.79274	0.652308	2.7483	0.0059906	0.00909565	2.68182	3.165	4.36832	9.46208	13.0985	11.8988	MSMEG_RS27085	enoyl-CoA hydratase/isomerase family protein
MSMEG_6212	2855.64	1.78974	0.125469	14.2644	3.64591e-46	2.50743e-45	1210.4	1124.93	1505.98	5043.29	3938.92	4310.35	MSMEG_RS29960	hemerythrin domain-containing protein
MSMEG_2186	6.5783	1.78956	0.718293	2.49141	0.0127236	0.0185939	2.23485	2.71285	4.36832	6.30805	7.48488	16.3609	MSMEG_RS10605	urea carboxylase-associated family protein
MSMEG_2455	38.7645	1.78742	0.299009	5.97781	2.26158e-09	5.36414e-09	15.644	21.2507	15.2891	59.9265	58.0078	62.4688	MSMEG_RS11905	SRPBCC family protein
MSMEG_0069	2287.67	1.78525	0.0973469	18.339	4.03937e-75	4.21156e-74	1129.94	1024.55	929.359	3734.37	3265.28	3642.53	MSMEG_RS00335	hypothetical protein
MSMEG_1907	10.9096	1.78449	0.593564	3.00639	0.00264368	0.00414952	7.59849	4.52142	2.18416	22.0782	11.2273	17.8482	MSMEG_RS09265	benzoate 1,2-dioxygenase small subunit
MSMEG_2229	16.0212	1.78324	0.565739	3.15206	0.00162125	0.00260376	7.59849	11.7557	2.7302	9.46208	39.2956	25.285	MSMEG_RS10805	enoyl-CoA hydratase
MSMEG_3211	361.702	1.78189	0.123104	14.4746	1.75219e-47	1.23507e-46	160.909	167.745	156.713	637.113	503.358	544.371	MSMEG_RS15595	imidazole glycerol phosphate synthase subunit HisF
MSMEG_5600	56.3761	1.77534	0.283133	6.27034	3.60255e-10	8.9664e-10	28.1591	23.5114	22.3876	126.161	71.1064	66.9308	MSMEG_RS26985	hypothetical protein
MSMEG_3992	124.027	1.77475	0.184965	9.59503	8.38918e-22	3.26631e-21	60.7879	53.8049	51.3277	230.244	166.539	181.457	MSMEG_RS19340	MHS family MFS transporter
MSMEG_4635	172.373	1.77404	0.163652	10.8403	2.2177e-27	1.00406e-26	86.2652	71.8906	73.1693	305.94	261.971	235.002	MSMEG_RS22365	ammonium transporter
MSMEG_1488	68.6078	1.77362	0.266514	6.65488	2.83525e-11	7.43197e-11	23.2424	38.8842	29.4861	129.315	110.402	80.317	MSMEG_RS07270	thiamine pyrophosphate-binding protein
MSMEG_1489	34.6956	1.77346	0.396835	4.46901	7.8582e-06	1.51888e-05	15.644	12.66	20.7495	18.9242	59.879	80.317	MSMEG_RS07275	hypothetical protein
MSMEG_4027	65.8678	1.77316	0.240908	7.3603	1.83499e-13	5.26619e-13	30.8409	33.0064	25.6639	91.4667	123.501	90.7285	MSMEG_RS19505	zinc-binding dehydrogenase
MSMEG_4860	2.04556	1.77197	1.2595	1.40688	0.159462	0.196044	1.78788	0.452142	0.546039	3.15403	1.87122	4.46206	MSMEG_RS23420	alpha/beta fold hydrolase
MSMEG_0342	40.2862	1.77142	0.290399	6.09994	1.06107e-09	2.56724e-09	18.7727	17.6336	17.4733	72.5426	61.7503	53.5447	MSMEG_RS01685	hypothetical protein
MSMEG_4440	24.3345	1.7678	0.366725	4.82051	1.43194e-06	2.91496e-06	11.6212	9.94713	11.4668	41.0023	31.8107	40.1585	MSMEG_RS21460	SDR family oxidoreductase
MSMEG_4153	36.8258	1.76561	0.30086	5.86854	4.39657e-09	1.02819e-08	17.8788	16.2771	15.8351	56.7725	63.6215	50.57	MSMEG_RS20095	cytochrome P450
MSMEG_3706	2010.35	1.76552	0.0930883	18.9661	3.24983e-80	3.61425e-79	962.327	960.802	814.145	3254.95	3117.45	2952.39	MSMEG_RS17980	isocitrate lyase ICL2
MSMEG_6838	37.0674	1.76458	0.366412	4.81584	1.46583e-06	2.98302e-06	23.2424	13.5643	12.0129	85.1587	46.7805	41.6459	MSMEG_RS32960	alpha/beta fold hydrolase
MSMEG_5609	190.477	1.76414	0.164031	10.7549	5.6171e-27	2.51686e-26	89.841	73.2471	99.3792	258.63	297.524	324.243	MSMEG_RS27030	carotenoid oxygenase family protein
MSMEG_5796	2469.63	1.76331	0.0911124	19.3531	1.91902e-83	2.22949e-82	1050.83	1112.27	1205.11	4071.85	3888.4	3489.33	MSMEG_RS27935	folate-binding protein YgfZ
MSMEG_4316	138.871	1.76184	0.190629	9.24222	2.41427e-20	8.96533e-20	71.9622	53.3528	63.3406	223.936	245.13	175.508	MSMEG_RS20895	methylated-DNA--[protein]-cysteine S-methyltransferase
MSMEG_4736	17.5369	1.76162	0.466025	3.7801	0.000156765	0.000274761	8.04546	6.78213	9.82871	22.0782	16.841	41.6459	MSMEG_RS22855	polysaccharide pyruvyl transferase family protein
MSMEG_5626	18.5297	1.7591	0.45415	3.87339	0.000107332	0.00019074	6.70455	6.78213	11.4668	34.6943	33.682	17.8482	MSMEG_RS27115	LLM class flavin-dependent oxidoreductase
MSMEG_2947	144.828	1.758	0.217792	8.07191	6.92048e-16	2.18673e-15	82.6895	57.8742	54.6039	293.324	187.122	193.356	MSMEG_RS14310	cyclase family protein
MSMEG_5143	56.7907	1.75503	0.248015	7.07631	1.48044e-12	4.11262e-12	27.2652	28.0328	21.8416	94.6208	84.2049	84.7791	MSMEG_RS24800	LacI family DNA-binding transcriptional regulator
MSMEG_5769	510.694	1.75465	0.107876	16.2654	1.73728e-59	1.4872e-58	233.765	248.678	215.14	829.509	793.397	743.676	MSMEG_RS27810	hypothetical protein
MSMEG_2454	167.043	1.75433	0.150398	11.6646	1.93276e-31	9.78561e-31	76.8789	75.0556	76.9916	264.938	245.13	263.261	MSMEG_RS11900	RidA family protein
MSMEG_6705	390.071	1.75387	0.121506	14.4344	3.14147e-47	2.20241e-46	174.318	189.448	169.272	624.497	647.442	535.447	MSMEG_RS32320	IclR family transcriptional regulator
MSMEG_6739	4920.2	1.75293	0.114384	15.3249	5.21477e-53	4.01032e-52	2095.84	2103.37	2551.64	8512.72	7677.62	6580.05	MSMEG_RS32480	hypothetical protein
MSMEG_3207	573.929	1.74908	0.100875	17.3392	2.38172e-67	2.26211e-66	266.841	276.259	244.626	902.051	900.057	853.74	MSMEG_RS15575	imidazoleglycerol-phosphate dehydratase HisB
MSMEG_6450	265.095	1.7481	0.137901	12.6765	7.98506e-37	4.63433e-36	130.962	111.227	120.675	454.18	363.017	410.509	MSMEG_RS31115	hypothetical protein
MSMEG_3982	129.92	1.74783	0.181384	9.63606	5.63084e-22	2.20688e-21	66.1516	59.6828	50.7817	230.244	185.251	187.406	MSMEG_RS19290	acyl-CoA dehydrogenase family protein
MSMEG_RS19795	52.3144	1.74749	0.254672	6.86174	6.80251e-12	1.83695e-11	21.9015	24.8678	25.6639	78.8506	74.8488	87.7538	MSMEG_RS19795	hypothetical protein
MSMEG_5654	95.0322	1.74676	0.193656	9.0199	1.88267e-19	6.82755e-19	46.0379	42.0492	42.045	157.701	136.599	145.76	MSMEG_RS27245	LysR family transcriptional regulator
MSMEG_4849	100.053	1.74367	0.203265	8.5783	9.62838e-18	3.26432e-17	48.7197	42.5014	46.4134	151.393	183.38	127.912	MSMEG_RS23365	mycofactocin-coupled SDR family oxidoreductase
MSMEG_RS18740	44.4946	1.74134	0.280075	6.21739	5.05498e-10	1.25001e-09	19.6667	20.3464	21.8416	59.9265	84.2049	60.9814	MSMEG_RS18740	DUF58 domain-containing protein
MSMEG_1798	79.867	1.74033	0.225991	7.7009	1.35111e-14	4.06959e-14	33.5228	37.98	36.5846	157.701	112.273	101.14	MSMEG_RS08740	MHS family MFS transporter
MSMEG_2558	71.5238	1.73851	0.342654	5.07366	3.90232e-07	8.18191e-07	45.591	23.5114	27.302	179.779	78.5912	74.3676	MSMEG_RS12405	cytochrome P450
MSMEG_5457	232.718	1.73799	0.131992	13.1674	1.35164e-39	8.32745e-39	111.743	106.253	103.747	356.405	368.63	349.528	MSMEG_RS26295	shikimate 5-dehydrogenase
MSMEG_2995	4.07726	1.73606	0.949463	1.82847	0.0674796	0.0890331	2.68182	1.35643	1.09208	12.6161	3.74244	2.9747	MSMEG_RS14545	TetR/AcrR family transcriptional regulator
MSMEG_4191	810.542	1.73588	0.0890112	19.5018	1.05975e-84	1.24904e-83	364.281	369.852	388.78	1271.07	1197.58	1271.69	MSMEG_RS20280	SCO1664 family protein
MSMEG_6808	36.961	1.7358	0.306614	5.6612	1.5032e-08	3.40641e-08	17.8788	16.7293	15.8351	63.0805	63.6215	44.6206	MSMEG_RS32820	spirocyclase AveC family protein
MSMEG_4733	41.0593	1.73368	0.296534	5.84649	5.02042e-09	1.16987e-08	21.0076	14.9207	20.2035	75.6966	58.0078	56.5194	MSMEG_RS22840	GAP family protein
MSMEG_4061	100.097	1.73337	0.197636	8.77049	1.77887e-18	6.20221e-18	44.697	47.9271	45.8673	167.163	125.372	169.558	MSMEG_RS19660	RidA family protein
MSMEG_4809	6.87197	1.73265	0.699884	2.47562	0.0133005	0.019376	4.02273	2.26071	3.82228	3.15403	13.0985	14.8735	MSMEG_RS23175	Rieske (2Fe-2S) protein
MSMEG_3593	393.238	1.73159	0.118042	14.6693	1.01327e-48	7.36572e-48	173.424	170.91	202.035	621.343	574.465	617.251	MSMEG_RS17450	DUF72 domain-containing protein
MSMEG_1361	1078.55	1.72999	0.111394	15.5303	2.16229e-54	1.70313e-53	436.243	487.409	574.98	1725.25	1641.06	1606.34	MSMEG_RS06645	alpha-mannosidase
MSMEG_5607	1400.13	1.72947	0.0949704	18.2106	4.25056e-74	4.3345e-73	713.364	628.478	601.189	2274.05	2043.37	2140.3	MSMEG_RS27020	hypothetical protein
MSMEG_5353	281.405	1.72713	0.130031	13.2824	2.92744e-40	1.82432e-39	117.106	132.478	142.516	438.41	419.153	438.769	MSMEG_RS25800	methyltransferase domain-containing protein
MSMEG_4339	252.766	1.72503	0.14434	11.9512	6.39915e-33	3.37929e-32	117.106	117.557	113.576	454.18	385.471	328.705	MSMEG_RS21010	helix-turn-helix transcriptional regulator
MSMEG_5238	577.553	1.72462	0.124286	13.8763	8.82012e-44	5.85548e-43	241.364	264.503	299.23	876.819	993.618	789.784	MSMEG_RS25250	DUF4245 domain-containing protein
MSMEG_RS14085	19.1157	1.71588	0.415509	4.12958	3.63426e-05	6.71528e-05	8.49243	10.8514	7.09851	31.5403	29.9395	26.7723	MSMEG_RS14085	hypothetical protein
MSMEG_5969	593.157	1.7148	0.115253	14.8786	4.53944e-50	3.34848e-49	297.235	264.503	264.829	1034.52	815.852	882	MSMEG_RS28775	glycosyltransferase family 1 protein
MSMEG_2168	5.525	1.71139	0.871358	1.96404	0.049525	0.0666725	3.57576	0.452142	3.27624	15.7701	5.61366	4.46206	MSMEG_RS10515	hypothetical protein
MSMEG_2256	12.8828	1.7106	0.506127	3.37978	0.000725447	0.00119913	7.59849	5.42571	4.91435	22.0782	14.9698	22.3103	MSMEG_RS10930	LLM class F420-dependent oxidoreductase
MSMEG_4405	55.25	1.70937	0.265759	6.43203	1.25907e-10	3.21488e-10	20.5606	28.485	29.4861	78.8506	72.9776	101.14	MSMEG_RS21305	sigma-70 family RNA polymerase sigma factor
MSMEG_4421	14.3076	1.70666	0.517171	3.3	0.000966863	0.0015821	4.91667	5.42571	10.3747	18.9242	14.9698	31.2344	MSMEG_RS21375	DoxX family membrane protein
MSMEG_1780	158.831	1.70666	0.164936	10.3474	4.29929e-25	1.82461e-24	63.4698	77.3163	82.998	249.168	230.16	249.875	MSMEG_RS08655	divalent metal cation transporter
MSMEG_1168	76.6218	1.70367	0.224826	7.57773	3.51644e-14	1.04085e-13	37.0985	34.3628	36.0386	116.699	140.342	95.1905	MSMEG_RS05690	transcriptional regulator
MSMEG_6777	894.961	1.70141	0.0840845	20.2345	4.86859e-91	6.223e-90	422.834	426.822	414.444	1340.46	1364.12	1401.09	MSMEG_RS32670	enoyl-CoA hydratase/isomerase family protein
MSMEG_0514	63.1913	1.70081	0.268642	6.33114	2.43362e-10	6.1014e-10	21.9015	38.8842	28.3941	100.929	80.4625	108.577	MSMEG_RS02500	alpha-glucosidase/alpha-galactosidase
MSMEG_4928	7.59872	1.69968	0.69016	2.46274	0.0137881	0.0200549	2.23485	6.32999	2.18416	9.46208	14.9698	10.4115	MSMEG_RS23755	methylated-DNA--[protein]-cysteine S-methyltransferase
MSMEG_2347	1681.39	1.69915	0.100677	16.8772	6.61919e-64	6.023e-63	709.342	768.19	899.873	2548.45	2529.89	2632.61	MSMEG_RS11365	phytoene desaturase
MSMEG_5551	124.114	1.69848	0.172302	9.85758	6.3561e-23	2.5558e-22	55.4243	57.8742	61.1564	205.012	185.251	179.97	MSMEG_RS26750	ATP-binding protein
MSMEG_2807	14.5001	1.69838	0.520971	3.26002	0.00111403	0.00181332	8.04546	3.165	9.28267	22.0782	28.0683	16.3609	MSMEG_RS13600	response regulator transcription factor
MSMEG_5698	2032.23	1.69773	0.0769115	22.0738	5.64973e-108	8.5086e-107	930.592	949.951	993.246	3068.87	3259.67	2991.06	MSMEG_RS27460	GTP 3',8-cyclase MoaA
MSMEG_4419	11.9805	1.69619	0.515769	3.28866	0.00100664	0.00164511	5.81061	5.87785	4.91435	22.0782	16.841	16.3609	MSMEG_RS21365	SDR family oxidoreductase
MSMEG_6495	28.7397	1.69585	0.374948	4.5229	6.09982e-06	1.18997e-05	20.1137	9.94713	10.9208	37.8483	43.0381	50.57	MSMEG_RS31330	ABC transporter permease subunit
MSMEG_2276	2790.12	1.69345	0.0848726	19.9529	1.41536e-88	1.75064e-87	1397.68	1339.25	1211.66	4519.72	4131.65	4140.79	MSMEG_RS11025	hydrogenase expression/formation protein HypE
MSMEG_0122	26.8303	1.68956	0.354596	4.76475	1.89091e-06	3.82295e-06	10.7273	13.5643	13.1049	50.4644	37.4244	35.6964	MSMEG_RS00600	tripartite tricarboxylate transporter substrate binding protein
MSMEG_1491	45.2514	1.68762	0.277767	6.07566	1.23483e-09	2.97217e-09	20.1137	21.7028	22.3876	75.6966	54.2654	77.3423	MSMEG_RS07285	histidinol-phosphate aminotransferase family protein
MSMEG_2632	43.7896	1.6859	0.275022	6.13005	8.78527e-10	2.14151e-09	20.1137	19.8943	21.8416	72.5426	67.3639	60.9814	MSMEG_RS12770	class I SAM-dependent methyltransferase
MSMEG_3391	192.445	1.68542	0.171771	9.81204	9.99292e-23	3.99594e-22	104.144	94.0456	73.1693	321.711	308.751	252.85	MSMEG_RS16485	CoA transferase
MSMEG_3397	146.829	1.68287	0.164431	10.2345	1.38875e-24	5.81791e-24	74.644	68.2735	66.6168	223.936	202.092	245.413	MSMEG_RS16515	ArgE/DapE family deacylase
MSMEG_2701	651.508	1.68207	0.110272	15.2539	1.55111e-52	1.18445e-51	295.447	304.292	324.893	1129.14	894.443	960.829	MSMEG_RS13100	hypothetical protein
MSMEG_RS10415	6.18512	1.67863	0.770054	2.17988	0.0292661	0.0407109	3.12879	4.06928	1.09208	15.7701	5.61366	7.43676	MSMEG_RS10415	hypothetical protein
MSMEG_2217	8.84456	1.67773	0.656325	2.55625	0.0105808	0.0155779	4.91667	3.61714	3.27624	25.2322	5.61366	10.4115	MSMEG_RS10760	AMP-binding protein
MSMEG_2153	173.853	1.67662	0.148044	11.3251	9.85364e-30	4.7593e-29	83.5834	84.0985	81.9059	252.322	260.1	281.11	MSMEG_RS10450	helix-turn-helix transcriptional regulator
MSMEG_0125	38.8023	1.67638	0.362294	4.62713	3.70761e-06	7.34523e-06	18.7727	18.0857	18.5653	69.3886	26.1971	81.8044	MSMEG_RS00610	tripartite tricarboxylate transporter permease
MSMEG_3603	333.544	1.67624	0.155405	10.7863	3.99687e-27	1.79707e-26	183.258	168.649	125.589	482.566	471.547	569.656	MSMEG_RS17490	alcohol dehydrogenase catalytic domain-containing protein
MSMEG_4840	28.8791	1.67434	0.355617	4.70827	2.49823e-06	5.00878e-06	10.2803	13.1121	18.0193	44.1564	50.5229	37.1838	MSMEG_RS23325	aromatic ring-hydroxylating dioxygenase subunit alpha
MSMEG_3765	1595.59	1.67146	0.0823606	20.2945	1.43923e-91	1.85052e-90	754.039	766.833	769.916	2352.9	2316.57	2613.28	MSMEG_RS18245	TetR family transcriptional regulator
MSMEG_4126	739.402	1.67054	0.105945	15.768	5.16848e-56	4.17197e-55	376.349	358.097	321.617	1211.15	1141.44	1027.76	MSMEG_RS19970	isochorismatase family protein
MSMEG_2346	1685.24	1.6667	0.115519	14.4279	3.45555e-47	2.42e-46	693.251	777.685	952.293	2592.61	2479.37	2616.25	MSMEG_RS11360	phytoene/squalene synthase family protein
MSMEG_4881	18.4668	1.66586	0.423892	3.92991	8.49783e-05	0.000152222	7.59849	8.13856	10.3747	34.6943	26.1971	23.7976	MSMEG_RS23525	methylmalonyl-CoA mutase
MSMEG_1283	297.951	1.66487	0.137621	12.0976	1.08795e-33	5.86915e-33	159.568	144.686	121.767	485.72	449.093	426.87	MSMEG_RS06270	type II toxin-antitoxin system VapB family antitoxin
MSMEG_3392	128.868	1.6635	0.191503	8.68655	3.73618e-18	1.28953e-17	76.8789	54.7092	53.5119	198.704	187.122	202.28	MSMEG_RS16490	acyl-CoA dehydrogenase family protein
MSMEG_6795	19.2551	1.66151	0.445455	3.72992	0.000191538	0.000333819	11.1743	7.68642	8.19059	34.6943	37.4244	16.3609	MSMEG_RS32755	enoyl-CoA hydratase/isomerase family protein
MSMEG_RS13725	160.693	1.66101	0.152477	10.8935	1.23803e-27	5.65236e-27	78.6667	74.6035	77.5376	255.476	241.387	236.489	MSMEG_RS13725	hypothetical protein
MSMEG_4815	17.4497	1.66037	0.534058	3.10897	0.00187741	0.00299887	8.04546	13.5643	2.7302	37.8483	18.7122	23.7976	MSMEG_RS23205	alpha/beta fold hydrolase
MSMEG_5606	392.5	1.66012	0.1217	13.6411	2.2822e-42	1.47888e-41	179.235	181.309	204.219	618.189	638.086	533.959	MSMEG_RS27015	cytochrome d ubiquinol oxidase subunit II
MSMEG_5709	57.3665	1.65839	0.275164	6.02691	1.67123e-09	3.99157e-09	33.9697	28.0328	22.3876	59.9265	89.8186	110.064	MSMEG_RS27515	hypothetical protein
MSMEG_4064	31.969	1.65801	0.323531	5.12472	2.97976e-07	6.29222e-07	16.0909	17.1814	13.651	37.8483	50.5229	56.5194	MSMEG_RS19675	NADP-dependent oxidoreductase
MSMEG_6533	57.4231	1.65382	0.242291	6.82573	8.74769e-12	2.34497e-11	27.2652	27.1285	27.848	97.7748	84.2049	80.317	MSMEG_RS31510	alpha/beta hydrolase
MSMEG_4175	36.9983	1.65321	0.329875	5.01162	5.39732e-07	1.12332e-06	19.2197	17.1814	15.2891	78.8506	54.2654	37.1838	MSMEG_RS20200	winged helix-turn-helix transcriptional regulator
MSMEG_0313	99.7993	1.65228	0.224979	7.34416	2.07051e-13	5.92901e-13	42.9091	54.2571	50.2356	107.237	147.826	196.33	MSMEG_RS01545	phosphogluconate dehydratase
MSMEG_2231	18.4196	1.64969	0.453105	3.64085	0.000271739	0.00046672	12.0682	7.23428	8.19059	18.9242	22.4546	41.6459	MSMEG_RS10815	acyl-CoA synthetase
MSMEG_4378	71.3946	1.64961	0.243124	6.78505	1.16046e-11	3.09045e-11	33.0758	41.5971	27.302	123.007	114.144	89.2411	MSMEG_RS21180	response regulator transcription factor
MSMEG_2979	23.477	1.64805	0.369417	4.46123	8.14918e-06	1.57278e-05	12.0682	11.7557	10.3747	34.6943	31.8107	40.1585	MSMEG_RS14465	urea ABC transporter ATP-binding protein UrtD
MSMEG_6811	107.446	1.64775	0.184614	8.92539	4.44121e-19	1.58587e-18	50.9546	56.5178	49.6896	145.085	168.41	174.02	MSMEG_RS32835	DUF2236 domain-containing protein
MSMEG_2859	12.4984	1.64743	0.537435	3.06535	0.00217415	0.00344497	8.04546	3.61714	7.09851	12.6161	16.841	26.7723	MSMEG_RS13865	MCE family protein
MSMEG_5944	67.3458	1.64671	0.232171	7.09268	1.3154e-12	3.66195e-12	35.7576	30.7457	32.7624	85.1587	99.1747	120.476	MSMEG_RS28650	GMC family oxidoreductase
MSMEG_4864	9.17205	1.6449	0.590197	2.78703	0.00531928	0.00811615	5.36364	4.52142	3.27624	15.7701	11.2273	14.8735	MSMEG_RS23440	FAD-binding protein
MSMEG_4903	315.407	1.64399	0.122303	13.442	3.43073e-41	2.16913e-40	152.417	158.25	150.161	432.102	522.07	477.44	MSMEG_RS23630	glutamate racemase
MSMEG_3209	566.555	1.64379	0.0976754	16.8291	1.49257e-63	1.35624e-62	270.417	283.945	269.197	854.741	892.572	828.455	MSMEG_RS15585	bifunctional 1-(5-phosphoribosyl)-5-((5-phosphoribosylamino)methylideneamino)imidazole-4-carboxamide isomerase/phosphoribosylanthranilate isomerase PriA
MSMEG_4636	133.103	1.64377	0.182594	9.0023	2.21045e-19	7.99844e-19	52.7425	66.4649	74.2614	208.166	209.577	187.406	MSMEG_RS22370	hypothetical protein
MSMEG_6035	157.124	1.6437	0.154999	10.6046	2.83599e-26	1.24922e-25	73.7501	79.1249	76.4455	223.936	254.486	235.002	MSMEG_RS29095	flavin reductase
MSMEG_6787	475.965	1.64236	0.108446	15.1445	8.24298e-52	6.23591e-51	226.167	220.193	244.08	782.198	681.124	702.03	MSMEG_RS32715	D-erythrulose 4-phosphate isomerase DerI2
MSMEG_4066	70.5743	1.6402	0.239789	6.84017	7.91006e-12	2.12656e-11	38.4394	37.5278	28.3941	78.8506	119.758	120.476	MSMEG_RS19685	acetylxylan esterase
MSMEG_3601	349.044	1.63897	0.168059	9.75232	1.80299e-22	7.15258e-22	208.735	175.431	124.497	510.952	525.813	548.833	MSMEG_RS17480	ABC transporter permease
MSMEG_1248	929.921	1.63843	0.12337	13.2806	2.9996e-40	1.8675e-39	524.743	441.291	388.78	1469.78	1270.56	1484.38	MSMEG_RS06100	hypothetical protein
MSMEG_2496	143.904	1.63497	0.184722	8.85098	8.67524e-19	3.06246e-18	58.5531	68.2735	85.1822	205.012	203.963	242.438	MSMEG_RS12105	D-2-hydroxyacid dehydrogenase
MSMEG_2862	5.7138	1.63407	0.755978	2.16154	0.0306537	0.0424959	2.23485	1.80857	4.36832	9.46208	7.48488	8.92411	MSMEG_RS13880	hypothetical protein
MSMEG_2069	265.046	1.63387	0.136957	11.9298	8.2774e-33	4.34647e-32	114.871	128.861	144.154	413.177	374.244	414.971	MSMEG_RS10045	phosphotransferase family protein
MSMEG_2245	78.8379	1.63355	0.219743	7.4339	1.05445e-13	3.05579e-13	39.3334	34.3628	39.8609	141.931	117.887	99.6526	MSMEG_RS10885	nuclear transport factor 2 family protein
MSMEG_4325	7269.82	1.63131	0.0601008	27.1429	3.07053e-162	7.23799e-161	3589.17	3542.08	3510.49	11146.3	10967.2	10863.6	MSMEG_RS20940	ACP S-malonyltransferase
MSMEG_6686	486.828	1.62678	0.135698	11.9882	4.09502e-33	2.17487e-32	271.758	233.758	205.311	801.122	770.943	638.074	MSMEG_RS32235	glutaryl-CoA dehydrogenase
MSMEG_4049	149.549	1.62528	0.167995	9.67458	3.8668e-22	1.521e-21	84.4774	68.7256	66.6168	214.474	241.387	221.615	MSMEG_RS19615	MFS transporter
MSMEG_0557	412.175	1.62321	0.169234	9.59146	8.68446e-22	3.37723e-21	166.273	182.665	255	738.042	568.851	562.219	MSMEG_RS33485	hypothetical protein
MSMEG_5989	870.522	1.62218	0.0900968	18.0049	1.78313e-72	1.79029e-71	428.197	434.057	417.174	1359.39	1221.91	1362.41	MSMEG_RS28870	hypothetical protein
MSMEG_5458	226.455	1.6203	0.156411	10.3592	3.79986e-25	1.61475e-24	99.6743	111.679	118.491	416.331	310.623	301.932	MSMEG_RS26300	GNAT family N-acetyltransferase
MSMEG_2066	43.7443	1.61866	0.285312	5.6733	1.40074e-08	3.1831e-08	16.5379	23.9635	24.0257	66.2345	69.2351	62.4688	MSMEG_RS10030	nuclear transport factor 2 family protein
MSMEG_4168	79.4522	1.61845	0.219462	7.37463	1.64807e-13	4.74439e-13	41.5682	42.5014	34.4005	100.929	116.016	141.298	MSMEG_RS20165	propionate CoA-transferase
MSMEG_5375	191.317	1.61691	0.146809	11.0137	3.28334e-28	1.51607e-27	89.841	96.7585	95.5569	299.632	258.228	307.882	MSMEG_RS25905	FadR family transcriptional regulator
MSMEG_3385	44.7255	1.61385	0.28704	5.62241	1.88317e-08	4.24823e-08	23.6894	22.155	18.5653	88.3127	56.1366	59.4941	MSMEG_RS16455	nuclear transport factor 2 family protein
MSMEG_1201	38.8221	1.61098	0.29205	5.5161	3.46607e-08	7.69634e-08	17.8788	20.3464	20.2035	47.3104	61.7503	65.4435	MSMEG_RS05855	sensor domain-containing protein
MSMEG_2967	3.60306	1.60954	0.921798	1.74609	0.080795	0.105004	1.78788	1.80857	1.63812	6.30805	5.61366	4.46206	MSMEG_RS14410	flavin reductase family protein
MSMEG_5987	19.9345	1.60871	0.406183	3.96054	7.47793e-05	0.000134582	12.5152	8.5907	8.73663	25.2322	31.8107	32.7217	MSMEG_RS28860	response regulator transcription factor
MSMEG_6676	2038.05	1.60854	0.0701447	22.9318	2.2412e-116	3.59144e-115	993.615	1020.49	1006.35	3034.17	3130.55	3043.12	MSMEG_RS32180	membrane protein
MSMEG_0305	147.423	1.60837	0.160432	10.0252	1.18092e-23	4.85042e-23	76.4319	67.3692	73.7153	236.552	213.319	217.153	MSMEG_RS01505	1-acyl-sn-glycerol-3-phosphate acyltransferase
MSMEG_5857	31.5141	1.60692	0.35706	4.50043	6.78146e-06	1.31781e-05	21.0076	14.9207	9.82871	56.7725	44.9093	41.6459	MSMEG_RS28230	NAD(P)-dependent oxidoreductase
MSMEG_4502	179.904	1.60668	0.154922	10.3709	3.3648e-25	1.43268e-24	80.4546	97.2106	90.0965	264.938	250.743	295.983	MSMEG_RS21745	16S rRNA (uracil(1498)-N(3))-methyltransferase
MSMEG_4763	50.0434	1.60614	0.286509	5.60591	2.0717e-08	4.66221e-08	25.9243	29.8414	17.4733	88.3127	59.879	78.8297	MSMEG_RS22955	ABC transporter permease
MSMEG_2721	51.2712	1.60478	0.270427	5.93424	2.95206e-09	6.96883e-09	19.2197	26.2243	30.5782	82.0047	76.72	72.8802	MSMEG_RS13190	hydrogenase nickel incorporation protein HypB
MSMEG_5819	83.3628	1.60398	0.219074	7.32164	2.44955e-13	6.98367e-13	42.0152	37.98	41.499	160.855	104.788	113.039	MSMEG_RS28040	PPOX class F420-dependent oxidoreductase
MSMEG_1968	49.1552	1.60065	0.271851	5.88797	3.90977e-09	9.17971e-09	25.0303	27.5807	21.8416	56.7725	72.9776	90.7285	MSMEG_RS09550	SDR family oxidoreductase
MSMEG_3783	208.533	1.59924	0.163999	9.7515	1.8176e-22	7.20616e-22	97.8865	104.897	104.84	381.637	245.13	316.806	MSMEG_RS18335	acyl-CoA/acyl-ACP dehydrogenase
MSMEG_1536	148.496	1.59834	0.168709	9.47397	2.69417e-21	1.0329e-20	65.2576	70.5342	85.1822	236.552	213.319	220.128	MSMEG_RS07510	type VII secretion protein EccC
MSMEG_0394	285.139	1.59769	0.141696	11.2755	1.73427e-29	8.32706e-29	131.409	162.319	133.78	378.483	430.381	474.465	MSMEG_RS01950	hypothetical protein
MSMEG_1514	202.37	1.59723	0.15446	10.3407	4.6099e-25	1.95388e-24	103.697	104.897	91.7346	305.94	346.176	261.774	MSMEG_RS07400	LLM class F420-dependent oxidoreductase
MSMEG_5627	9.22729	1.59688	0.596535	2.67693	0.00743006	0.0111614	4.4697	3.165	6.55247	9.46208	16.841	14.8735	MSMEG_RS27120	aromatic ring-hydroxylating dioxygenase subunit alpha
MSMEG_1860	11.7027	1.59337	0.517098	3.08136	0.00206057	0.00327456	6.25758	6.32999	4.91435	15.7701	20.5834	16.3609	MSMEG_RS09045	hypothetical protein
MSMEG_3920	268.935	1.59284	0.139938	11.3825	5.11013e-30	2.49224e-29	139.455	131.121	128.319	463.642	340.562	410.509	MSMEG_RS19000	hypothetical protein
MSMEG_1519	2280.05	1.59209	0.0919529	17.3141	3.68013e-67	3.48514e-66	1142.01	1026.82	1238.42	3453.66	3566.55	3252.84	MSMEG_RS07425	translation initiation factor IF-1
MSMEG_1966	201.39	1.59204	0.165603	9.6136	7.00551e-22	2.73577e-21	113.53	108.966	78.6297	283.862	312.494	310.857	MSMEG_RS09540	hypothetical protein
MSMEG_0252	688.772	1.592	0.0938685	16.9599	1.62569e-64	1.48549e-63	341.485	360.357	325.44	1062.91	1031.04	1011.4	MSMEG_RS01240	tRNA (guanosine(46)-N7)-methyltransferase TrmB
MSMEG_3731	24.8492	1.59135	0.371247	4.28651	1.815e-05	3.4158e-05	14.75	9.49499	13.651	28.3862	41.1668	41.6459	MSMEG_RS18090	membrane dipeptidase
MSMEG_3011	41.3703	1.59132	0.330028	4.82177	1.42288e-06	2.89832e-06	22.7955	19.4421	18.5653	69.3886	82.3337	35.6964	MSMEG_RS14625	NAD(P)/FAD-dependent oxidoreductase
MSMEG_4094	54.5661	1.59035	0.269456	5.90208	3.58945e-09	8.44286e-09	22.3485	28.0328	29.4861	107.237	74.8488	65.4435	MSMEG_RS19815	acyl-CoA dehydrogenase family protein
MSMEG_3555	41.9503	1.59031	0.287697	5.52773	3.24406e-08	7.21076e-08	24.1364	19.8943	19.1114	59.9265	54.2654	74.3676	MSMEG_RS17270	hydrolase
MSMEG_2904	19.1517	1.58979	0.418607	3.79782	0.000145972	0.000256952	10.2803	6.78213	11.4668	31.5403	28.0683	26.7723	MSMEG_RS14095	LLM class flavin-dependent oxidoreductase
MSMEG_0606	265.067	1.58816	0.148377	10.7035	9.79617e-27	4.37432e-26	154.652	118.009	121.767	435.256	394.827	365.889	MSMEG_RS02945	TetR/AcrR family transcriptional regulator
MSMEG_3981	105.091	1.58608	0.202984	7.81382	5.54822e-15	1.6923e-14	62.1289	53.3528	41.499	154.547	170.281	148.735	MSMEG_RS19285	CoA transferase
MSMEG_5906	422.587	1.58427	0.136707	11.5888	4.69865e-31	2.35693e-30	240.47	211.15	180.193	652.883	688.609	562.219	MSMEG_RS28465	acyl-CoA dehydrogenase family protein
MSMEG_0665	199.112	1.58402	0.157934	10.0296	1.12937e-23	4.64162e-23	108.167	99.9235	87.3663	340.635	301.266	257.312	MSMEG_RS03245	FAD-binding oxidoreductase
MSMEG_3547	28.5245	1.58211	0.357626	4.42393	9.69209e-06	1.86008e-05	13.8561	14.0164	14.197	56.7725	26.1971	46.1079	MSMEG_RS17230	ectoine/hydroxyectoine ABC transporter substrate-binding protein EhuB
MSMEG_3089	23.9872	1.58131	0.389246	4.0625	4.85493e-05	8.86008e-05	12.0682	11.7557	10.9208	53.6184	24.3259	31.2344	MSMEG_RS15005	deoxyribose-phosphate aldolase
MSMEG_4317	126.726	1.57848	0.192754	8.18909	2.63212e-16	8.45659e-16	71.9622	50.6399	67.7089	192.396	209.577	168.071	MSMEG_RS20900	2OG-Fe(II) oxygenase
MSMEG_6041	314.839	1.57637	0.121469	12.9776	1.64032e-38	9.86316e-38	151.523	157.798	163.812	485.72	495.873	434.307	MSMEG_RS29125	acyl-CoA dehydrogenase family protein
MSMEG_1326	37.4433	1.57527	0.29806	5.28507	1.25657e-07	2.70434e-07	17.4318	22.155	16.9272	53.6184	58.0078	56.5194	MSMEG_RS33505	hypothetical protein
MSMEG_6642	853.226	1.57478	0.097284	16.1875	6.1792e-59	5.22781e-58	413.447	426.822	447.206	1236.38	1399.67	1195.83	MSMEG_RS32025	CoA transferase
MSMEG_4368	149.906	1.57476	0.157723	9.98434	1.78489e-23	7.26691e-23	76.8789	76.4121	72.0772	227.09	235.774	211.204	MSMEG_RS21135	hypothetical protein
MSMEG_2736	1817.98	1.57246	0.079625	19.7483	8.30029e-87	1.00189e-85	893.046	881.678	968.128	2832.31	2634.68	2698.06	MSMEG_RS13265	GTPase HflX
MSMEG_4272	5070.13	1.57205	0.0807564	19.4666	2.10948e-84	2.47284e-83	2561.59	2469.6	2618.26	8301.4	7262.21	7207.71	MSMEG_RS20675	iron-sulfur cluster assembly accessory protein
MSMEG_3143	3977.15	1.57194	0.0773299	20.3277	7.31008e-92	9.4177e-91	2095.84	1986.26	1917.69	6349.05	5795.17	5718.87	MSMEG_RS15260	aconitate hydratase
MSMEG_4863	13.3341	1.57007	0.512715	3.06227	0.00219666	0.00347893	8.49243	4.06928	8.19059	12.6161	24.3259	22.3103	MSMEG_RS23435	LLM class flavin-dependent oxidoreductase
MSMEG_4925	367.16	1.57004	0.111646	14.0626	6.44396e-45	4.35352e-44	176.106	189.9	188.384	564.571	535.169	548.833	MSMEG_RS23740	DNA-3-methyladenine glycosylase 2 family protein
MSMEG_4104	59.1237	1.56906	0.246878	6.35562	2.07589e-10	5.22263e-10	33.0758	30.7457	26.2099	82.0047	78.5912	104.115	MSMEG_RS19865	MFS transporter
MSMEG_1490	43.4856	1.5667	0.27827	5.63013	1.80074e-08	4.0665e-08	19.6667	20.7985	25.6639	63.0805	69.2351	62.4688	MSMEG_RS07280	3-oxoacyl-ACP synthase
MSMEG_6037	250.262	1.56645	0.129384	12.107	9.69742e-34	5.24015e-33	132.303	127.504	117.945	384.791	376.115	362.914	MSMEG_RS29105	alpha/beta fold hydrolase
MSMEG_2004	12.5548	1.56595	0.506883	3.08938	0.00200577	0.00319215	7.59849	4.97357	6.55247	18.9242	14.9698	22.3103	MSMEG_RS09720	MFS transporter
MSMEG_1403	14909.1	1.56578	0.0652031	24.0138	1.99392e-127	3.49662e-126	7753.59	7334.65	7496.03	22668	22830.8	21371.8	MSMEG_RS06855	cutinase family protein
MSMEG_6662	756.353	1.56576	0.0939539	16.6652	2.34678e-62	2.09727e-61	372.326	408.285	363.116	1166.99	1113.38	1114.03	MSMEG_RS32115	SDR family oxidoreductase
MSMEG_5396	110.056	1.56346	0.196999	7.93639	2.0815e-15	6.45482e-15	51.4016	52.4485	60.6104	201.858	157.182	136.836	MSMEG_RS26000	response regulator
MSMEG_5921	145.444	1.56331	0.176723	8.84608	9.06475e-19	3.1913e-18	86.7122	71.8906	62.2485	201.858	235.774	214.179	MSMEG_RS28540	OB-fold domain-containing protein
MSMEG_6445	296.455	1.56158	0.129255	12.0814	1.32442e-33	7.12709e-33	134.091	152.824	164.904	422.639	456.578	447.693	MSMEG_RS31095	PHP domain-containing protein
MSMEG_1847	55.7179	1.56096	0.244366	6.38777	1.68321e-10	4.25943e-10	29.5	26.6764	28.9401	75.6966	91.6898	81.8044	MSMEG_RS08975	4Fe-4S dicluster domain-containing protein
MSMEG_2071	125.649	1.5583	0.174676	8.92109	4.61721e-19	1.646e-18	56.7652	63.2999	70.9851	192.396	188.993	181.457	MSMEG_RS10055	TetR/AcrR family transcriptional regulator
MSMEG_4008	61.4002	1.55583	0.270359	5.75467	8.68128e-09	1.99648e-08	26.3712	32.1021	32.7624	123.007	91.6898	62.4688	MSMEG_RS19425	isopenicillin N synthase family oxygenase
MSMEG_1979	224.136	1.55552	0.138071	11.266	1.9309e-29	9.22352e-29	108.167	116.653	114.668	369.021	303.138	333.167	MSMEG_RS09605	antibiotic biosynthesis monooxygenase
MSMEG_1539	38.3188	1.55548	0.340221	4.57196	4.83191e-06	9.49453e-06	13.8561	15.825	28.3941	66.2345	58.0078	47.5953	MSMEG_RS07525	WXG100 family type VII secretion target
MSMEG_3858	2324.21	1.55529	0.0721287	21.5626	4.02866e-103	5.78598e-102	1178.66	1166.08	1191.46	3639.75	3358.84	3410.5	MSMEG_RS18700	RNA polymerase-binding protein RbpA
MSMEG_4651	223.427	1.55401	0.159693	9.73124	2.21881e-22	8.77543e-22	122.023	115.748	102.655	346.943	269.456	383.737	MSMEG_RS22440	TIM barrel protein
MSMEG_3602	368.709	1.55376	0.128813	12.0622	1.67354e-33	8.98354e-33	207.841	194.873	158.897	539.338	559.495	551.808	MSMEG_RS17485	sugar ABC transporter ATP-binding protein
MSMEG_6716	166.836	1.55369	0.189699	8.1903	2.60566e-16	8.37571e-16	80.0077	68.7256	108.116	214.474	261.971	267.723	MSMEG_RS32370	sugar phosphate isomerase/epimerase
MSMEG_1345	2268.83	1.55324	0.0713037	21.7835	3.32941e-105	4.90072e-104	1136.65	1160.65	1161.43	3453.66	3248.44	3452.14	MSMEG_RS06565	transcription termination/antitermination protein NusG
MSMEG_0328	75.8447	1.54957	0.235684	6.57479	4.87228e-11	1.26341e-10	46.9319	40.2407	28.9401	100.929	123.501	114.526	MSMEG_RS01615	hypothetical protein
MSMEG_1167	970.255	1.54739	0.112169	13.7952	2.72451e-43	1.79956e-42	556.925	494.192	433.009	1378.31	1562.47	1396.62	MSMEG_RS05685	cytochrome P450
MSMEG_5116	195.069	1.54648	0.154321	10.0212	1.23045e-23	5.04746e-23	103.697	90.8806	107.024	252.322	286.297	330.192	MSMEG_RS24665	DUF309 domain-containing protein
MSMEG_5623	11.0337	1.54525	0.614414	2.515	0.0119031	0.0174347	6.70455	5.87785	3.82228	25.2322	3.74244	20.8229	MSMEG_RS27100	CoA transferase
MSMEG_4839	4.61099	1.54294	0.865422	1.78287	0.0746071	0.0977174	0.89394	3.165	3.27624	3.15403	11.2273	5.94941	MSMEG_RS23320	carboxymuconolactone decarboxylase family protein
MSMEG_1846	30.967	1.54291	0.326056	4.73206	2.22258e-06	4.47265e-06	15.644	15.825	16.9272	37.8483	43.0381	56.5194	MSMEG_RS08970	polysulfide reductase NrfD
MSMEG_0481	48.8419	1.54233	0.284797	5.41556	6.10967e-08	1.34062e-07	23.2424	28.9371	20.7495	97.7748	59.879	62.4688	MSMEG_RS02345	FAD-dependent oxidoreductase
MSMEG_6810	23.6993	1.54129	0.391252	3.93938	8.16935e-05	0.000146499	11.1743	14.0164	9.82871	50.4644	29.9395	26.7723	MSMEG_RS32830	VWA domain-containing protein
MSMEG_0961	108.534	1.54094	0.226676	6.79801	1.06077e-11	2.83076e-11	58.5531	59.2306	48.0515	154.547	213.319	117.501	MSMEG_RS04680	DUF2236 domain-containing protein
MSMEG_4650	270.612	1.53918	0.148287	10.3797	3.06821e-25	1.30725e-24	155.546	146.494	114.668	362.713	432.252	411.997	MSMEG_RS22435	Gfo/Idh/MocA family oxidoreductase
MSMEG_2425	477.482	1.5371	0.153609	10.0066	1.42547e-23	5.83643e-23	270.417	260.886	205.857	615.035	645.571	867.126	MSMEG_RS11755	ammonium transporter
MSMEG_5915	201.957	1.53679	0.145679	10.5491	5.12661e-26	2.2385e-25	109.061	106.253	93.3727	315.403	312.494	275.16	MSMEG_RS28510	crotonase/enoyl-CoA hydratase family protein
MSMEG_0990	2589.01	1.53679	0.0739034	20.7946	4.84762e-96	6.50281e-95	1313.2	1361.4	1312.13	3639.75	3890.27	4017.34	MSMEG_RS04820	S-methyl-5'-thioadenosine phosphorylase
MSMEG_2165	10.2793	1.53496	0.758729	2.02307	0.0430656	0.0585548	1.78788	8.13856	6.55247	0	31.8107	13.3862	MSMEG_RS10500	transketolase
MSMEG_1871	20.9769	1.53403	0.391883	3.9145	9.05904e-05	0.000161918	12.9621	9.94713	9.82871	25.2322	33.682	34.2091	MSMEG_RS09090	WXG100 family type VII secretion target
MSMEG_4122	40.3775	1.53136	0.282392	5.42283	5.8662e-08	1.28807e-07	21.0076	19.8943	21.2955	59.9265	63.6215	56.5194	MSMEG_RS19950	MHS family MFS transporter
MSMEG_3134	162.345	1.53042	0.165509	9.24673	2.31455e-20	8.59994e-20	91.6289	72.7949	86.8203	223.936	271.327	227.565	MSMEG_RS15215	cytochrome P450
MSMEG_2569	9.92592	1.5297	0.602592	2.53853	0.0111319	0.0163522	3.57576	4.97357	6.00643	25.2322	9.3561	10.4115	MSMEG_RS12460	isopenicillin N synthase family oxygenase
MSMEG_6376	100.549	1.52943	0.204964	7.46193	8.52662e-14	2.48207e-13	54.0834	45.2142	54.0579	182.933	119.758	147.248	MSMEG_RS30755	LacI family DNA-binding transcriptional regulator
MSMEG_5932	54.8852	1.52751	0.254159	6.01006	1.85452e-09	4.4196e-09	28.6061	30.2935	24.5718	97.7748	69.2351	78.8297	MSMEG_RS28595	hypothetical protein
MSMEG_2032	1043.14	1.52611	0.0933027	16.3565	3.90989e-60	3.38719e-59	556.031	526.294	525.29	1671.63	1568.08	1411.5	MSMEG_RS09860	YggS family pyridoxal phosphate-dependent enzyme
MSMEG_5323	464.605	1.52509	0.170814	8.92838	4.32297e-19	1.54534e-18	189.068	214.768	317.249	643.421	709.192	713.929	MSMEG_RS25650	GNAT family N-acetyltransferase
MSMEG_2917	286.284	1.52422	0.122284	12.4646	1.16452e-35	6.55397e-35	148.394	149.659	146.885	403.715	415.411	453.642	MSMEG_RS14160	hypothetical protein
MSMEG_3354	115.166	1.52415	0.218693	6.96938	3.18334e-12	8.72401e-12	75.091	53.8049	46.9594	208.166	147.826	159.147	MSMEG_RS16310	TetR/AcrR family transcriptional regulator
MSMEG_6590	191.4	1.52204	0.140604	10.825	2.61981e-27	1.18447e-26	97.8865	101.28	97.195	283.862	290.039	278.135	MSMEG_RS31775	nuclear transport factor 2 family protein
MSMEG_0894	111.147	1.52063	0.223515	6.80327	1.02268e-11	2.73022e-11	54.9773	65.1085	55.696	100.929	190.864	199.305	MSMEG_RS04360	Gfo/Idh/MocA family oxidoreductase
MSMEG_0240	1419.26	1.5176	0.0812083	18.6877	6.23346e-78	6.7479e-77	713.811	779.945	712.035	2050.12	2123.83	2135.84	MSMEG_RS01180	hypothetical protein
MSMEG_2068	118.865	1.51749	0.174631	8.68971	3.63375e-18	1.25551e-17	58.5531	61.4914	65.5247	170.317	168.41	188.894	MSMEG_RS10040	hypothetical protein
MSMEG_1961	232.9	1.51536	0.138268	10.9596	5.97485e-28	2.7491e-27	117.553	132.026	114.668	309.095	361.145	362.914	MSMEG_RS09515	ESX-1 secretion-associated protein
MSMEG_6532	94.9997	1.5152	0.201895	7.50492	6.14638e-14	1.79804e-13	57.2122	47.4749	42.5911	138.777	151.569	132.374	MSMEG_RS31505	TetR/AcrR family transcriptional regulator
MSMEG_2998	484.876	1.51487	0.116512	13.0018	1.19447e-38	7.23575e-38	228.849	254.556	267.013	804.277	686.738	667.821	MSMEG_RS14560	DinB family protein
MSMEG_5059	498.332	1.51242	0.111419	13.5742	5.69532e-42	3.64702e-41	283.826	257.721	234.251	734.888	714.806	764.499	MSMEG_RS24400	ABC transporter permease subunit
MSMEG_3429	274.201	1.51135	0.125739	12.0197	2.79893e-33	1.49349e-32	151.97	133.382	141.424	410.023	409.797	398.61	MSMEG_RS16680	acyltransferase
MSMEG_0089	69.8394	1.51028	0.272473	5.54288	2.97542e-08	6.63403e-08	32.1819	38.8842	34.9465	154.547	69.2351	89.2411	MSMEG_RS00440	pirin family protein
MSMEG_6265	340.294	1.51003	0.126989	11.8911	1.31697e-32	6.87658e-32	189.068	155.537	187.292	479.412	535.169	495.288	MSMEG_RS30225	helix-turn-helix transcriptional regulator
MSMEG_4326	12603.1	1.50663	0.0717207	21.0069	5.67272e-98	7.6889e-97	6268.31	6691.71	6728.3	18356.4	17873.9	19700	MSMEG_RS20945	acyl carrier protein
MSMEG_3605	672.601	1.50623	0.161026	9.35395	8.44333e-21	3.1794e-20	431.326	359.453	257.185	1078.68	974.906	934.057	MSMEG_RS17500	NAD(P)-dependent alcohol dehydrogenase
MSMEG_5923	157.783	1.50514	0.177658	8.47211	2.40987e-17	8.03619e-17	92.5228	71.8906	79.1757	283.862	202.092	217.153	MSMEG_RS28550	thiolase domain-containing protein
MSMEG_0915	324.916	1.5045	0.128923	11.6698	1.81854e-31	9.2217e-31	182.364	169.101	153.437	533.03	434.123	477.44	MSMEG_RS04460	polyphosphate kinase 2 family protein
MSMEG_3369	37.1925	1.50337	0.34335	4.37853	1.1948e-05	2.27557e-05	19.6667	15.3728	21.2955	85.1587	35.5532	46.1079	MSMEG_RS16380	aromatic acid/H+ symport family MFS transporter
MSMEG_5605	635.55	1.5027	0.132363	11.3528	7.18051e-30	3.4863e-29	316.455	288.015	389.326	1021.9	830.822	966.779	MSMEG_RS27010	cytochrome ubiquinol oxidase subunit I
MSMEG_0265	188.502	1.50212	0.183949	8.16598	3.18835e-16	1.01983e-15	96.0986	81.3856	115.214	343.789	228.289	266.236	MSMEG_RS01310	UdgX family uracil-DNA binding protein
MSMEG_6038	528.135	1.50153	0.100644	14.9192	2.47337e-50	1.83905e-49	292.318	269.477	265.921	760.12	797.14	783.835	MSMEG_RS29110	flavin-dependent monooxygenase
MSMEG_4042	628.717	1.50082	0.133701	11.2252	3.06665e-29	1.45632e-28	397.356	297.057	289.401	955.67	871.989	960.829	MSMEG_RS19580	GntR family transcriptional regulator
MSMEG_2561	37.1367	1.50081	0.339466	4.4211	9.81988e-06	1.88294e-05	20.5606	20.7985	15.8351	59.9265	72.9776	32.7217	MSMEG_RS12420	SMP-30/gluconolactonase/LRE family protein
MSMEG_2568	10.3378	1.50064	0.578919	2.59214	0.00953812	0.0141195	4.91667	6.32999	4.91435	12.6161	24.3259	8.92411	MSMEG_RS12455	alpha/beta hydrolase
MSMEG_4176	102.611	1.50059	0.216715	6.92427	4.38238e-12	1.19579e-11	67.0455	44.3099	48.5975	154.547	170.281	130.887	MSMEG_RS20205	SRPBCC family protein
MSMEG_4492	778.599	1.49959	0.106653	14.0604	6.65065e-45	4.4885e-44	385.735	415.971	420.45	1151.22	1023.56	1274.66	MSMEG_RS21705	amidase
MSMEG_0273	5.91543	1.49894	0.777911	1.92687	0.0539955	0.0722679	0.89394	4.52142	3.82228	9.46208	9.3561	7.43676	MSMEG_RS01345	EutN/CcmL family microcompartment protein
MSMEG_1204	2124.55	1.49726	0.070385	21.2724	2.04436e-100	2.84201e-99	1104.02	1121.31	1105.73	3226.57	3136.16	3053.53	MSMEG_RS05865	beta-ketoacyl-ACP synthase
MSMEG_4648	42.4186	1.49622	0.30411	4.91998	8.65542e-07	1.78259e-06	23.6894	22.155	22.9337	34.6943	69.2351	81.8044	MSMEG_RS22425	LacI family DNA-binding transcriptional regulator
MSMEG_0661	392.998	1.49571	0.112553	13.2889	2.68575e-40	1.67853e-39	221.697	199.847	194.39	596.111	568.851	577.093	MSMEG_RS03220	aspartate aminotransferase family protein
MSMEG_5594	63.382	1.4954	0.232833	6.42262	1.3395e-10	3.41462e-10	36.6516	31.1978	32.7624	82.0047	93.561	104.115	MSMEG_RS26960	Rieske 2Fe-2S domain-containing protein
MSMEG_2581	1093.96	1.49495	0.0933764	16.0099	1.08987e-57	9.03276e-57	549.326	545.736	627.399	1536.01	1676.61	1628.65	MSMEG_RS12520	GNAT family N-acetyltransferase
MSMEG_4615	7.4217	1.49476	0.677718	2.20558	0.0274137	0.0382979	3.12879	2.26071	6.55247	9.46208	11.2273	11.8988	MSMEG_RS22265	AAA family ATPase
MSMEG_0663	152.457	1.49317	0.155639	9.59383	8.48732e-22	3.30254e-21	81.3486	75.5078	82.452	233.398	218.933	223.103	MSMEG_RS03230	TetR family transcriptional regulator
MSMEG_1502	593.667	1.49299	0.135082	11.0525	2.13309e-28	9.91278e-28	362.493	320.117	250.632	848.433	920.64	859.689	MSMEG_RS07340	ATP-binding cassette domain-containing protein
MSMEG_5099	30.3308	1.4929	0.325938	4.58033	4.64248e-06	9.13611e-06	14.75	17.1814	15.2891	50.4644	41.1668	43.1332	MSMEG_RS24585	hypothetical protein
MSMEG_3674	4527.6	1.48823	0.0720785	20.6474	1.03016e-94	1.35398e-93	2343.91	2518.88	2276.98	6522.52	6828.08	6675.24	MSMEG_RS17835	hypothetical protein
MSMEG_1402	1125.9	1.48785	0.0888241	16.7505	5.61436e-63	5.05215e-62	578.826	585.976	605.558	1813.56	1568.08	1603.37	MSMEG_RS06850	hypothetical protein
MSMEG_4979	70.216	1.48652	0.241082	6.16603	7.00255e-10	1.71595e-09	41.1213	39.7885	29.4861	97.7748	125.372	87.7538	MSMEG_RS24005	sulfate adenylyltransferase subunit CysD
MSMEG_4854	32.3992	1.48636	0.322568	4.6079	4.06759e-06	8.02661e-06	14.75	19.8943	15.8351	53.6184	48.6517	41.6459	MSMEG_RS23390	aminopeptidase P family protein
MSMEG_4675	17.0137	1.48515	0.433701	3.42437	0.000616223	0.00102588	8.49243	9.49499	8.73663	28.3862	18.7122	28.2597	MSMEG_RS22555	tRNA-Pro
MSMEG_4717	221.709	1.48439	0.172214	8.61947	6.72677e-18	2.29975e-17	130.962	110.323	104.84	391.099	338.691	254.337	MSMEG_RS22760	acetyl-CoA carboxylase subunit beta
MSMEG_1160	27.3039	1.48366	0.378944	3.91525	9.03087e-05	0.000161503	19.6667	9.49499	14.7431	31.5403	39.2956	49.0826	MSMEG_RS05655	ABC transporter ATP-binding protein
MSMEG_0443	46.3719	1.48273	0.268301	5.52637	3.2692e-08	7.26415e-08	24.1364	23.0593	27.302	56.7725	71.1064	75.855	MSMEG_RS02165	hydrolase
MSMEG_1378	112.108	1.48189	0.202435	7.32034	2.47341e-13	7.04553e-13	65.7046	48.3792	61.7025	195.55	134.728	166.583	MSMEG_RS06730	1-phosphofructokinase family hexose kinase
MSMEG_4002	253.622	1.48147	0.139389	10.6283	2.20024e-26	9.71152e-26	128.28	149.207	126.135	337.481	368.63	411.997	MSMEG_RS19395	alcohol dehydrogenase catalytic domain-containing protein
MSMEG_3645	2905.95	1.47872	0.0827778	17.8637	2.26126e-71	2.2495e-70	1604.18	1558.08	1435.54	4589.11	4096.1	4152.69	MSMEG_RS17695	bifunctional nuclease family protein
MSMEG_4879	25.9857	1.47819	0.355288	4.16055	3.17487e-05	5.88986e-05	14.75	13.1121	13.651	31.5403	48.6517	34.2091	MSMEG_RS23515	LLM class F420-dependent oxidoreductase
MSMEG_5090	338.597	1.47749	0.120554	12.2558	1.56352e-34	8.56249e-34	188.174	177.24	173.095	479.412	467.805	545.858	MSMEG_RS24555	hypothetical protein
MSMEG_1205	1504.34	1.47632	0.110504	13.3598	1.03801e-40	6.51233e-40	901.539	763.216	716.404	2450.68	2065.83	2128.4	MSMEG_RS05875	class I SAM-dependent methyltransferase
MSMEG_6735	20.1473	1.47553	0.420161	3.51182	0.000445057	0.000749946	14.303	9.94713	7.09851	34.6943	28.0683	26.7723	MSMEG_RS32460	amino acid permease
MSMEG_0085	116.579	1.47526	0.18351	8.03915	9.04672e-16	2.85026e-15	63.4698	65.1085	54.6039	195.55	149.698	171.045	MSMEG_RS00420	PTS sugar transporter subunit IIA
MSMEG_2537	125.433	1.47502	0.188076	7.84267	4.41059e-15	1.34846e-14	66.1516	71.4385	62.2485	182.933	149.698	220.128	MSMEG_RS12305	MFS transporter
MSMEG_2722	14.6073	1.47485	0.475781	3.09984	0.00193623	0.00308753	8.9394	5.87785	8.19059	22.0782	26.1971	16.3609	MSMEG_RS13195	hydrogenase maturation nickel metallochaperone HypA
MSMEG_2952	57.6993	1.4737	0.244471	6.02811	1.65884e-09	3.96342e-09	29.5	28.485	32.7624	94.6208	87.9473	72.8802	MSMEG_RS14335	MFS transporter
MSMEG_5270	677.43	1.47218	0.0917686	16.0423	6.46832e-58	5.36771e-57	353.106	348.602	375.675	996.672	995.489	995.039	MSMEG_RS25405	cystathionine beta-synthase
MSMEG_5924	281.591	1.4721	0.130991	11.2382	2.64863e-29	1.26149e-28	147.947	135.191	163.812	438.41	389.214	414.971	MSMEG_RS28555	hypothetical protein
MSMEG_5947	551.06	1.4689	0.116899	12.5656	3.26544e-36	1.86196e-35	315.561	269.929	287.217	902.051	810.238	721.366	MSMEG_RS28660	serine acetyltransferase
MSMEG_0304	232.762	1.46705	0.132853	11.0427	2.37904e-28	1.10164e-27	118.447	122.983	129.411	353.251	319.979	352.502	MSMEG_RS01500	acyl-CoA ligase FadD12
MSMEG_0251	423.326	1.46608	0.12155	12.0615	1.68625e-33	9.04432e-33	240.023	236.923	194.936	662.345	613.76	591.966	MSMEG_RS01235	NYN domain-containing protein
MSMEG_6687	511.89	1.46561	0.110624	13.2486	4.59805e-40	2.85721e-39	295	267.216	256.092	693.886	813.981	745.163	MSMEG_RS32240	aldehyde dehydrogenase family protein
MSMEG_4662	334.272	1.46474	0.126422	11.5861	4.84815e-31	2.43005e-30	188.174	183.118	159.444	514.106	514.586	446.206	MSMEG_RS22490	aldolase
MSMEG_6689	177.524	1.46447	0.166385	8.8017	1.3476e-18	4.71372e-18	107.72	99.0192	75.8995	261.784	254.486	266.236	MSMEG_RS32245	CoA transferase
MSMEG_6015	184.454	1.46442	0.148938	9.83246	8.15975e-23	3.27295e-22	108.167	92.6892	94.4648	258.63	265.713	287.059	MSMEG_RS29000	acyl-CoA/acyl-ACP dehydrogenase
MSMEG_4696	1018.16	1.46343	0.0989021	14.7968	1.53684e-49	1.12725e-48	489.879	542.571	594.637	1501.32	1435.23	1545.36	MSMEG_RS22655	glycoside hydrolase family 13 protein
MSMEG_1520	893.078	1.46341	0.0981362	14.9121	2.75151e-50	2.0412e-49	458.591	448.525	516.553	1403.54	1238.75	1292.51	MSMEG_RS07430	50S ribosomal protein L36
MSMEG_4810	76.1951	1.46201	0.215822	6.77414	1.25151e-11	3.32884e-11	40.2273	37.0757	43.1371	129.315	104.788	102.627	MSMEG_RS23180	alpha/beta hydrolase
MSMEG_3372	110.726	1.46193	0.190021	7.69351	1.43151e-14	4.29983e-14	67.4925	54.7092	52.9658	182.933	151.569	154.685	MSMEG_RS16395	helix-turn-helix transcriptional regulator
MSMEG_2545	794.425	1.4606	0.10933	13.3596	1.04166e-40	6.52893e-40	454.569	413.258	404.069	1075.52	1322.95	1096.18	MSMEG_RS12345	23S rRNA (adenine(2503)-C(2))-methyltransferase RlmN
MSMEG_3524	174.902	1.45843	0.161303	9.04158	1.54424e-19	5.61902e-19	92.5228	85.0028	99.3792	302.786	245.13	224.59	MSMEG_RS17115	cytochrome P450
MSMEG_2247	22.7044	1.45665	0.402677	3.61742	0.000297551	0.000509439	12.0682	15.825	7.64455	41.0023	29.9395	29.747	MSMEG_RS10895	NAD-dependent epimerase/dehydratase family protein
MSMEG_0991	877.681	1.45661	0.0999566	14.5725	4.20485e-48	3.01618e-47	432.667	469.776	506.725	1214.3	1382.83	1259.79	MSMEG_RS04825	NAD-dependent epimerase/dehydratase family protein
MSMEG_4001	229.542	1.45585	0.155499	9.36247	7.78956e-21	2.93791e-20	144.371	115.296	107.024	356.405	303.138	351.015	MSMEG_RS19390	ABC transporter permease
MSMEG_0226	82.891	1.45492	0.206127	7.05836	1.68475e-12	4.67021e-12	46.0379	45.6664	39.8609	135.623	114.144	116.013	MSMEG_RS01110	MmpS family protein
MSMEG_2141	14.6276	1.4548	0.489483	2.97211	0.00295763	0.00461889	5.81061	9.49499	7.64455	25.2322	26.1971	13.3862	MSMEG_RS10385	hypothetical protein
MSMEG_1203	735.184	1.45363	0.10874	13.3679	9.30861e-41	5.85704e-40	437.137	364.427	374.583	1166.99	1010.46	1057.51	MSMEG_RS05870	class I SAM-dependent methyltransferase
MSMEG_RS08820	14.4529	1.45268	0.489926	2.9651	0.00302583	0.00471861	8.9394	5.42571	8.73663	25.2322	13.0985	25.285	MSMEG_RS08820	DUF4012 domain-containing protein
MSMEG_0076	2694.82	1.45164	0.108602	13.3667	9.47016e-41	5.95293e-40	1521.93	1469.46	1338.89	3910.99	3422.46	4505.19	MSMEG_RS00370	type VII secretion system ESX-1 target EspB
MSMEG_5461	20.7693	1.45144	0.404746	3.58604	0.000335731	0.000571797	10.2803	9.04285	14.197	28.3862	37.4244	25.285	MSMEG_RS26310	hypothetical protein
MSMEG_2916	172.065	1.45029	0.146658	9.88896	4.64841e-23	1.87609e-22	91.1819	90.4285	95.5569	246.014	256.357	252.85	MSMEG_RS14155	response regulator transcription factor
MSMEG_0589	89.8481	1.44954	0.210129	6.89835	5.26118e-12	1.42979e-11	52.2955	45.6664	44.7752	157.701	104.788	133.862	MSMEG_RS02860	L-rhamnose isomerase
MSMEG_0734	53.7263	1.44886	0.262289	5.52389	3.31568e-08	7.3649e-08	32.1819	24.8678	28.9401	78.8506	93.561	63.9561	MSMEG_RS03575	Rieske (2Fe-2S) protein
MSMEG_2149	149.565	1.44884	0.195242	7.42072	1.16484e-13	3.36669e-13	82.6895	87.2635	68.801	258.63	159.054	240.951	MSMEG_RS10430	DUF4265 domain-containing protein
MSMEG_3472	497.905	1.44839	0.104194	13.9008	6.26155e-44	4.16967e-43	268.629	268.573	260.461	772.736	744.746	672.283	MSMEG_RS16870	URC4/urg3 family protein
MSMEG_5100	703.391	1.4469	0.0971584	14.8921	3.7077e-50	2.74117e-49	376.796	367.592	388.78	1047.14	946.837	1093.2	MSMEG_RS24595	indolepyruvate ferredoxin oxidoreductase family protein
MSMEG_6009	105.164	1.4443	0.208982	6.91112	4.80847e-12	1.30895e-11	48.2728	51.9964	67.7089	179.779	155.311	127.912	MSMEG_RS28970	TetR family transcriptional regulator KstR2
MSMEG_5976	118.268	1.44403	0.17469	8.26628	1.38205e-16	4.49357e-16	67.4925	62.8478	59.5183	182.933	162.796	174.02	MSMEG_RS28810	SDR family oxidoreductase
MSMEG_3613	114.526	1.43957	0.178244	8.07641	6.66986e-16	2.10856e-15	65.7046	59.6828	58.4262	182.933	155.311	165.096	MSMEG_RS17535	CGNR zinc finger domain-containing protein
MSMEG_0916	704.412	1.43831	0.0975765	14.7403	3.55113e-49	2.59592e-48	390.652	394.268	350.557	1088.14	1004.85	998.013	MSMEG_RS04465	TetR/AcrR family transcriptional regulator
MSMEG_6380	158.685	1.43829	0.166287	8.64944	5.1751e-18	1.7758e-17	98.7804	82.2899	74.8074	239.706	217.062	239.464	MSMEG_RS30770	ESX-1 secretion-associated protein
MSMEG_3578	193.771	1.43823	0.190206	7.56141	3.98718e-14	1.17679e-13	113.977	103.993	90.6425	365.867	276.941	211.204	MSMEG_RS17380	HAMP domain-containing protein
MSMEG_5579	2.69529	1.43797	1.06994	1.34397	0.178956	0.217991	1.34091	0.904285	2.18416	3.15403	5.61366	2.9747	MSMEG_RS26890	MarR family transcriptional regulator
MSMEG_0715	31.3325	1.43796	0.327135	4.39561	1.10464e-05	2.10817e-05	13.8561	20.3464	16.9272	41.0023	46.7805	49.0826	MSMEG_RS03490	SDR family oxidoreductase
MSMEG_1398	969.047	1.43751	0.0995069	14.4463	2.64411e-47	1.85773e-46	526.978	505.495	530.204	1583.32	1268.69	1399.6	MSMEG_RS06830	30S ribosomal protein S12
MSMEG_3388	17.6256	1.43732	0.479517	2.99743	0.00272267	0.00426836	5.81061	12.2078	10.3747	31.5403	13.0985	32.7217	MSMEG_RS16470	NDMA-dependent alcohol dehydrogenase
MSMEG_5601	30.5186	1.43684	0.366842	3.91679	8.9736e-05	0.000160567	12.0682	21.2507	14.7431	63.0805	31.8107	40.1585	MSMEG_RS26990	hypothetical protein
MSMEG_2912	55.8178	1.43625	0.256685	5.59536	2.20165e-08	4.94441e-08	29.947	29.3893	28.9401	104.083	78.5912	63.9561	MSMEG_RS14135	MHS family MFS transporter
MSMEG_1864	7.55322	1.4357	0.661328	2.17094	0.0299359	0.0415539	4.91667	5.42571	2.18416	6.30805	13.0985	13.3862	MSMEG_RS09060	integrase core domain-containing protein
MSMEG_1930	2768.44	1.43455	0.0870523	16.4792	5.17786e-61	4.52177e-60	1416	1418.82	1652.86	3980.38	4172.82	3969.74	MSMEG_RS09375	DEAD/DEAH box helicase
MSMEG_5224	1278.13	1.43421	0.0829651	17.2869	5.90489e-67	5.56771e-66	696.826	669.171	704.937	1911.34	1751.46	1935.04	MSMEG_RS25185	4-hydroxy-3-methylbut-2-enyl diphosphate reductase
MSMEG_6854	25.8169	1.43361	0.363161	3.94757	7.89475e-05	0.000141809	13.4091	13.5643	13.651	50.4644	35.5532	28.2597	MSMEG_RS33040	3-isopropylmalate dehydratase large subunit
MSMEG_5301	162.198	1.43279	0.167134	8.57273	1.0106e-17	3.41911e-17	80.4546	89.9763	96.1029	189.242	260.1	257.312	MSMEG_RS25545	TetR/AcrR family transcriptional regulator C-terminal ligand-binding domain-containing protein
MSMEG_5166	183.012	1.43097	0.14901	9.60318	7.75144e-22	3.02162e-21	97.8865	103.993	95.0109	258.63	295.653	246.9	MSMEG_RS24910	cation acetate symporter
MSMEG_0533	25.365	1.42927	0.362703	3.94061	8.1275e-05	0.000145869	15.644	11.7557	14.7431	28.3862	35.5532	46.1079	MSMEG_RS02590	N-acetylmuramoyl-L-alanine amidase
MSMEG_4661	431.063	1.42764	0.11043	12.928	3.1268e-38	1.86804e-37	245.834	222.906	229.883	671.807	583.821	632.125	MSMEG_RS22485	5-dehydro-2-deoxygluconokinase
MSMEG_3374	27.7475	1.42675	0.37528	3.80183	0.000143631	0.000252969	15.644	19.8943	9.82871	31.5403	52.3942	37.1838	MSMEG_RS16405	DUF2236 domain-containing protein
MSMEG_5315	250.098	1.42549	0.129026	11.0481	2.23884e-28	1.0382e-27	140.349	136.999	127.773	384.791	361.145	349.528	MSMEG_RS25615	N-acetylmuramoyl-L-alanine amidase
MSMEG_0953	1100.62	1.42485	0.0977903	14.5704	4.33172e-48	3.10376e-47	628.44	557.944	603.374	1709.48	1444.58	1659.88	MSMEG_RS04645	hydroxymethylbilane synthase
MSMEG_5571	249.93	1.4247	0.131968	10.7958	3.60174e-27	1.62165e-26	134.538	143.781	128.319	356.405	392.956	343.578	MSMEG_RS26850	sn-glycerol-3-phosphate ABC transporter ATP-binding protein UgpC
MSMEG_1977	704.657	1.4237	0.105797	13.4569	2.8038e-41	1.77446e-40	415.682	370.305	357.11	1125.99	986.133	972.728	MSMEG_RS09595	NAD(P)-dependent alcohol dehydrogenase
MSMEG_0309	378.05	1.42324	0.114659	12.4128	2.22756e-35	1.24935e-34	210.076	212.959	195.482	501.49	587.563	560.732	MSMEG_RS01525	aldehyde dehydrogenase
MSMEG_5815	54.3249	1.42321	0.256581	5.54682	2.90904e-08	6.49269e-08	31.2879	29.8414	28.9401	56.7725	97.3034	81.8044	MSMEG_RS28020	aldehyde dehydrogenase family protein
MSMEG_0656	52.8301	1.42303	0.261991	5.43159	5.58529e-08	1.22846e-07	26.8182	29.3893	30.0322	82.0047	58.0078	90.7285	MSMEG_RS03195	TetR family transcriptional regulator
MSMEG_4057	2369.11	1.42259	0.125984	11.2918	1.44014e-29	6.92504e-29	1498.69	1320.71	1038.57	3728.06	3332.64	3295.97	MSMEG_RS19640	GntR family transcriptional regulator
MSMEG_0590	124.419	1.42137	0.167732	8.47406	2.3698e-17	7.9107e-17	68.3864	68.7256	66.0708	176.625	185.251	181.457	MSMEG_RS02865	bifunctional rhamnulose-1-phosphate aldolase/short-chain dehydrogenase
MSMEG_4861	3.99031	1.41883	0.908229	1.5622	0.118241	0.149063	2.23485	2.71285	1.63812	3.15403	11.2273	2.9747	MSMEG_RS23425	cyclase family protein
MSMEG_2357	2022.46	1.41844	0.0875271	16.2058	4.59011e-59	3.8986e-58	1019.54	1110.01	1173.44	2971.09	3091.26	2769.45	MSMEG_RS11415	cysteine desulfurase
MSMEG_5982	34.2925	1.41801	0.308187	4.60113	4.20209e-06	8.2895e-06	18.3258	20.7985	16.3812	53.6184	50.5229	46.1079	MSMEG_RS28835	UDP-glucose/GDP-mannose dehydrogenase family protein
MSMEG_0473	39.4314	1.41791	0.316503	4.47994	7.46655e-06	1.44533e-05	18.7727	21.2507	26.2099	41.0023	50.5229	78.8297	MSMEG_RS02310	response regulator transcription factor
MSMEG_5858	22.9447	1.41757	0.381392	3.71683	0.000201742	0.00035085	14.303	9.94713	13.651	31.5403	28.0683	40.1585	MSMEG_RS28235	SDR family oxidoreductase
MSMEG_1300	133.317	1.41754	0.232144	6.10628	1.01982e-09	2.47204e-09	80.9016	88.6199	46.9594	217.628	159.054	206.742	MSMEG_RS06355	hypothetical protein
MSMEG_0968	407.844	1.41594	0.112526	12.5833	2.61027e-36	1.49625e-35	219.909	209.342	236.981	605.573	617.503	557.757	MSMEG_RS04715	cytochrome P450
MSMEG_3821	113.533	1.41467	0.193545	7.30926	2.68613e-13	7.63808e-13	66.1516	51.9964	69.893	138.777	175.895	178.482	MSMEG_RS18525	APC family permease
MSMEG_2889	33.1754	1.41334	0.36461	3.8763	0.000106058	0.000188579	23.2424	11.3036	18.5653	63.0805	48.6517	34.2091	MSMEG_RS14010	NADH:flavin oxidoreductase
MSMEG_3922	248.802	1.41203	0.129121	10.9357	7.78292e-28	3.57849e-27	138.114	130.669	139.786	359.559	342.433	382.249	MSMEG_RS19005	hypothetical protein
MSMEG_3521	1109.88	1.41148	0.0902303	15.6431	3.70086e-55	2.95071e-54	619.948	641.138	555.322	1665.33	1590.54	1587	MSMEG_RS17105	molybdopterin-dependent oxidoreductase
MSMEG_4812	19.1972	1.4113	0.471727	2.99178	0.00277358	0.00434398	6.70455	10.3993	13.1049	47.3104	16.841	20.8229	MSMEG_RS23190	NADH dehydrogenase
MSMEG_4884	16.2669	1.41128	0.556673	2.5352	0.0112384	0.0164994	12.5152	11.3036	2.7302	25.2322	13.0985	32.7217	MSMEG_RS23540	hypothetical protein
MSMEG_6491	28.8986	1.41077	0.345033	4.0888	4.33602e-05	7.95099e-05	15.644	14.9207	15.8351	50.4644	46.7805	29.747	MSMEG_RS31310	aldehyde dehydrogenase family protein
MSMEG_4837	10.3477	1.41001	0.554753	2.54169	0.0110319	0.0162163	6.70455	6.32999	3.82228	15.7701	13.0985	16.3609	MSMEG_RS23315	amidohydrolase
MSMEG_4013	132.017	1.40646	0.171044	8.22281	1.98796e-16	6.42189e-16	73.3031	69.1778	72.0772	223.936	172.152	181.457	MSMEG_RS19450	TIGR03842 family LLM class F420-dependent oxidoreductase
MSMEG_2918	158.077	1.40614	0.162649	8.64525	5.36875e-18	1.83934e-17	83.1365	94.4977	79.7218	261.784	207.705	221.615	MSMEG_RS14165	SDR family oxidoreductase
MSMEG_5767	121.217	1.40531	0.173302	8.10905	5.10166e-16	1.61909e-15	67.9395	65.1085	64.4327	195.55	172.152	162.121	MSMEG_RS27800	DUF2236 domain-containing protein
MSMEG_1202	393.453	1.40474	0.196745	7.13989	9.34068e-13	2.61716e-12	159.121	191.708	295.407	640.267	574.465	499.75	MSMEG_RS05860	hypothetical protein
MSMEG_5679	128.701	1.40425	0.181366	7.74264	9.73699e-15	2.94235e-14	64.8107	80.0292	69.347	151.393	205.834	200.793	MSMEG_RS27370	metalloregulator ArsR/SmtB family transcription factor
MSMEG_2637	83.0084	1.40345	0.212058	6.61821	3.63576e-11	9.48828e-11	46.9319	45.2142	42.045	148.239	108.531	107.089	MSMEG_RS12795	Gfo/Idh/MocA family oxidoreductase
MSMEG_2067	252.601	1.40301	0.128918	10.883	1.38987e-27	6.33229e-27	137.667	147.851	129.957	369.021	359.274	371.838	MSMEG_RS10035	class I SAM-dependent methyltransferase
MSMEG_2073	179.461	1.40297	0.151467	9.26256	1.99594e-20	7.44159e-20	107.273	91.7849	94.4648	280.708	260.1	242.438	MSMEG_RS10065	CoA transferase
MSMEG_6585	141.623	1.40286	0.1917	7.31798	2.51728e-13	7.16737e-13	91.1819	74.6035	64.4327	249.168	174.023	196.33	MSMEG_RS31750	acyl-CoA/acyl-ACP dehydrogenase
MSMEG_3587	31.0974	1.40243	0.327302	4.28482	1.8289e-05	3.44096e-05	18.7727	15.825	16.3812	44.1564	54.2654	37.1838	MSMEG_RS17425	D-serine/D-alanine/glycine transporter
MSMEG_3784	109.89	1.40193	0.191781	7.31004	2.67057e-13	7.59718e-13	68.3864	62.8478	50.2356	145.085	172.152	160.634	MSMEG_RS18345	IclR family transcriptional regulator
MSMEG_2100	32.8	1.39783	0.346095	4.03886	5.37106e-05	9.76092e-05	17.8788	14.4686	20.2035	66.2345	46.7805	31.2344	MSMEG_RS10195	M20/M25/M40 family metallo-hydrolase
MSMEG_5942	61.1436	1.39666	0.243639	5.7325	9.89612e-09	2.26865e-08	31.7349	34.815	32.7624	104.083	93.561	69.9055	MSMEG_RS28645	AMP-binding protein
MSMEG_5388	219.355	1.39661	0.149276	9.3559	8.28916e-21	3.12452e-20	121.129	113.036	123.951	381.637	293.782	282.597	MSMEG_RS25960	metal-sensitive transcriptional regulator
MSMEG_6083	16358.1	1.3963	0.0600169	23.2652	9.98746e-120	1.64087e-118	9166.02	8903.59	8954.5	23175.8	24309	23640	MSMEG_RS29340	A/G-specific adenine glycosylase MutY
MSMEG_0285	53.61	1.3962	0.250086	5.58289	2.36558e-08	5.29792e-08	31.2879	28.485	27.848	85.1587	80.4625	68.4182	MSMEG_RS01405	TetR/AcrR family transcriptional regulator
MSMEG_5254	20.7246	1.39588	0.396493	3.52057	0.000430621	0.00072675	9.83334	12.2078	13.1049	22.0782	29.9395	37.1838	MSMEG_RS25330	hypothetical protein
MSMEG_4883	53.2535	1.39429	0.302452	4.60994	4.02777e-06	7.95708e-06	22.7955	38.8842	24.5718	97.7748	80.4625	55.032	MSMEG_RS23535	long-chain fatty acid--CoA ligase
MSMEG_5300	19.719	1.39401	0.39964	3.48817	0.000486343	0.000817398	10.2803	12.2078	9.82871	31.5403	26.1971	28.2597	MSMEG_RS25540	SDR family oxidoreductase
MSMEG_6786	118.683	1.39376	0.198823	7.01003	2.38266e-12	6.57125e-12	60.341	70.0821	69.347	119.853	202.092	190.381	MSMEG_RS32705	dihydrofolate reductase family protein
MSMEG_6032	444.918	1.39362	0.109938	12.6765	7.9834e-37	4.63433e-36	264.159	228.784	243.534	627.651	671.768	633.612	MSMEG_RS29080	TetR/AcrR family transcriptional regulator
MSMEG_4640	1050.44	1.39304	0.124933	11.1503	7.13903e-29	3.35596e-28	635.592	580.551	514.915	1804.1	1375.35	1392.16	MSMEG_RS22395	transglycosylase family protein
MSMEG_4271	509.109	1.39236	0.116201	11.9824	4.39562e-33	2.33072e-32	278.462	279.424	287.217	719.118	653.056	837.379	MSMEG_RS20670	hypothetical protein
MSMEG_6621	13.4079	1.39141	0.518239	2.68488	0.00725553	0.0109118	6.70455	5.87785	8.73663	31.5403	11.2273	16.3609	MSMEG_RS31925	TIGR03619 family F420-dependent LLM class oxidoreductase
MSMEG_6266	187.031	1.39022	0.191948	7.2427	4.39826e-13	1.24413e-12	133.197	90.4285	84.6361	299.632	237.645	276.647	MSMEG_RS30230	nitrile hydratase subunit beta
MSMEG_4871	7.73788	1.39021	0.673038	2.06557	0.0388691	0.0530931	3.12879	2.71285	7.09851	12.6161	7.48488	13.3862	MSMEG_RS23475	SDR family NAD(P)-dependent oxidoreductase
MSMEG_2358	1539.98	1.38946	0.0960356	14.4682	1.92418e-47	1.35484e-46	778.622	839.628	939.188	2084.81	2292.24	2305.4	MSMEG_RS11420	tRNA 2-thiouridine(34) synthase MnmA
MSMEG_4121	399.266	1.38892	0.108747	12.772	2.34893e-37	1.37926e-36	231.978	211.603	217.324	589.803	578.207	566.681	MSMEG_RS19945	FadR family transcriptional regulator
MSMEG_3760	216.565	1.38817	0.166076	8.35862	6.34584e-17	2.09043e-16	146.606	114.392	97.7411	309.095	316.236	315.319	MSMEG_RS18225	helix-turn-helix domain-containing protein
MSMEG_3868	18.5024	1.38758	0.430055	3.22651	0.00125311	0.00203311	13.4091	7.68642	9.28267	28.3862	29.9395	22.3103	MSMEG_RS18750	hypothetical protein
MSMEG_1792	214.238	1.38644	0.135463	10.2348	1.38421e-24	5.80261e-24	122.917	119.818	114.122	293.324	312.494	322.755	MSMEG_RS08710	hypothetical protein
MSMEG_1093	34.1204	1.38638	0.318307	4.35546	1.32785e-05	2.51939e-05	19.2197	19.4421	19.6574	31.5403	52.3942	62.4688	MSMEG_RS05320	urease subunit beta
MSMEG_6449	97.5232	1.38594	0.203099	6.82395	8.85685e-12	2.37326e-11	60.341	57.4221	44.7752	132.469	130.985	159.147	MSMEG_RS31110	hypothetical protein
MSMEG_0527	39.8742	1.38567	0.317573	4.36329	1.28118e-05	2.43297e-05	28.1591	22.155	16.3812	44.1564	74.8488	53.5447	MSMEG_RS02560	SDR family oxidoreductase
MSMEG_0444	54.3481	1.38386	0.275675	5.01989	5.17024e-07	1.07675e-06	27.2652	25.32	39.3148	59.9265	95.4322	78.8297	MSMEG_RS02170	agmatine deiminase family protein
MSMEG_4880	18.2015	1.38173	0.456872	3.02434	0.0024918	0.00392343	8.04546	9.49499	11.4668	41.0023	24.3259	14.8735	MSMEG_RS23520	cobalamin-dependent protein
MSMEG_4010	28.8518	1.38022	0.361534	3.81767	0.000134717	0.000237848	14.75	20.3464	14.197	28.3862	37.4244	58.0067	MSMEG_RS19435	VOC family protein
MSMEG_3604	304.829	1.37982	0.174951	7.88688	3.09844e-15	9.52667e-15	213.205	155.085	135.964	514.106	406.055	404.56	MSMEG_RS17495	glucose 1-dehydrogenase
MSMEG_4410	16.9176	1.3798	0.435992	3.16473	0.00155227	0.00249606	9.83334	8.13856	10.9208	18.9242	22.4546	31.2344	MSMEG_RS21325	hypothetical protein
MSMEG_2624	1821.83	1.37944	0.0718533	19.198	3.84817e-82	4.40004e-81	1025.35	1005.11	1001.98	2680.92	2653.39	2564.19	MSMEG_RS12735	ribosome maturation factor RimP
MSMEG_4808	17.6623	1.37621	1.13005	1.21783	0.223289	0.266945	12.0682	11.7557	6.00643	0	44.9093	31.2344	MSMEG_RS23170	amidohydrolase
MSMEG_6147	35.5906	1.37552	0.341268	4.03063	5.56287e-05	0.000100898	18.7727	15.3728	23.4797	75.6966	43.0381	37.1838	MSMEG_RS29660	hypothetical protein
MSMEG_5507	14.1046	1.37439	0.564117	2.43636	0.0148358	0.0214731	8.04546	13.1121	2.7302	12.6161	24.3259	23.7976	MSMEG_RS26530	hypothetical protein
MSMEG_3394	327.858	1.37336	0.172361	7.9679	1.61391e-15	5.0336e-15	218.568	187.639	138.694	542.492	402.312	477.44	MSMEG_RS16500	cupin domain-containing protein
MSMEG_2564	19.3762	1.37214	0.447555	3.06585	0.00217049	0.00344	12.5152	13.1121	6.55247	31.5403	16.841	35.6964	MSMEG_RS12435	zinc-binding dehydrogenase
MSMEG_3987	150.31	1.37158	0.159359	8.60685	7.50976e-18	2.55938e-17	81.3486	90.8806	78.6297	223.936	203.963	223.103	MSMEG_RS19315	FAD-dependent oxidoreductase
MSMEG_3310	1004.12	1.37	0.100547	13.6255	2.82466e-42	1.82676e-41	507.311	552.97	618.663	1520.24	1433.35	1392.16	MSMEG_RS16065	DUF1206 domain-containing protein
MSMEG_5907	340.655	1.36933	0.11974	11.4359	2.76767e-30	1.35898e-29	201.137	182.665	184.561	526.722	449.093	499.75	MSMEG_RS28470	acyl-CoA/acyl-ACP dehydrogenase
MSMEG_1507	12.6585	1.36898	0.52049	2.63018	0.00853389	0.0127051	6.70455	4.52142	9.82871	22.0782	14.9698	17.8482	MSMEG_RS07365	P1 family peptidase
MSMEG_0070	1511	1.36792	0.125558	10.8947	1.2216e-27	5.58127e-27	935.956	869.018	721.318	2497.99	1888.06	2153.69	-	-
MSMEG_3476	501.677	1.36726	0.0998664	13.6909	1.151e-42	7.51095e-42	271.311	289.823	280.118	722.272	707.321	739.214	MSMEG_RS16890	M48 family metalloprotease
MSMEG_4772	67.0014	1.36531	0.222954	6.12371	9.14204e-10	2.22598e-09	39.7803	34.815	38.2228	91.4667	101.046	96.6779	MSMEG_RS22995	FadD3 family acyl-CoA ligase
MSMEG_5014	645.609	1.36285	0.147231	9.25649	2.11259e-20	7.86748e-20	362.493	389.295	327.078	1084.98	997.36	712.442	MSMEG_RS24175	heavy metal translocating P-type ATPase
MSMEG_3785	10.2795	1.36246	0.579869	2.3496	0.0187938	0.0268376	6.70455	7.23428	3.27624	15.7701	9.3561	19.3356	MSMEG_RS18350	sugar kinase
MSMEG_2179	248.749	1.36165	0.130305	10.4497	1.47027e-25	6.32225e-25	143.924	130.217	144.7	356.405	342.433	374.813	MSMEG_RS10570	TetR/AcrR family transcriptional regulator
MSMEG_4829	91.4861	1.36112	0.242762	5.60681	2.06093e-08	4.63959e-08	57.6592	57.4221	41.499	82.0047	149.698	160.634	MSMEG_RS23275	cytochrome P450
MSMEG_RS03540	194.386	1.36064	0.151944	8.95485	3.40183e-19	1.22278e-18	116.212	99.9235	107.57	324.865	254.486	263.261	MSMEG_RS03540	hypothetical protein
MSMEG_0666	167.324	1.35838	0.179169	7.58153	3.41496e-14	1.01174e-13	89.394	82.742	113.03	192.396	267.584	258.799	MSMEG_RS03240	acetate--CoA ligase family protein
MSMEG_1346	2500.55	1.35833	0.0773761	17.5549	5.45933e-69	5.29335e-68	1404.83	1327.94	1474.31	3750.14	3489.83	3556.26	MSMEG_RS06570	50S ribosomal protein L11
MSMEG_5968	334.105	1.35808	0.117515	11.5566	6.83332e-31	3.40932e-30	189.068	198.49	174.733	473.104	497.745	471.491	MSMEG_RS28770	oligosaccharide flippase family protein
MSMEG_1409	59.7517	1.35619	0.254108	5.33706	9.4465e-08	2.05274e-07	30.394	36.1714	32.2163	104.083	91.6898	63.9561	MSMEG_RS06885	arginine deiminase
MSMEG_2418	1342.5	1.35508	0.0998107	13.5765	5.52291e-42	3.5401e-41	691.016	779.493	787.935	2116.35	1931.1	1749.13	MSMEG_RS11720	ribonuclease III
MSMEG_4663	317.497	1.35401	0.123909	10.9274	8.52532e-28	3.91155e-27	178.341	174.075	181.285	473.104	492.131	406.047	MSMEG_RS22495	5-deoxy-glucuronate isomerase
MSMEG_0348	114.034	1.35347	0.184326	7.34282	2.09143e-13	5.98365e-13	70.1743	61.4914	60.0643	176.625	140.342	175.508	MSMEG_RS01715	MCE family protein
MSMEG_2915	201.782	1.3527	0.143604	9.41963	4.52679e-21	1.71828e-20	104.144	120.722	114.122	309.095	291.91	270.698	MSMEG_RS14150	HAMP domain-containing histidine kinase
MSMEG_5611	688.115	1.35236	0.119297	11.3361	8.68921e-30	4.20938e-29	441.16	389.747	329.262	999.826	1012.33	956.367	MSMEG_RS27040	Hsp20/alpha crystallin family protein
MSMEG_1609	75.2796	1.35193	0.213674	6.32706	2.4988e-10	6.25999e-10	42.9091	38.8842	46.4134	97.7748	114.144	111.551	MSMEG_RS07860	beta-phosphoglucomutase family hydrolase
MSMEG_1366	1491.98	1.35131	0.0850277	15.8926	7.13609e-57	5.83259e-56	880.978	825.16	812.507	2151.05	2269.79	2012.39	MSMEG_RS06670	ABC transporter ATP-binding protein MceG
MSMEG_2744	1059.09	1.35027	0.0866477	15.5834	9.43515e-55	7.47687e-54	612.796	608.131	564.605	1608.55	1489.49	1470.99	MSMEG_RS13300	PhzF family phenazine biosynthesis protein
MSMEG_2982	130.077	1.34696	0.180756	7.45182	9.20627e-14	2.67273e-13	75.9849	82.742	60.0643	198.704	181.508	181.457	MSMEG_RS14480	urea ABC transporter substrate-binding protein
MSMEG_2114	145.993	1.34686	0.21027	6.40541	1.49964e-10	3.80822e-10	60.341	81.3856	107.024	198.704	196.478	232.027	MSMEG_RS10265	cupin domain-containing protein
MSMEG_6719	106.625	1.34667	0.188887	7.12953	1.00714e-12	2.81585e-12	65.7046	62.3956	54.0579	129.315	164.667	163.609	MSMEG_RS32385	alpha/beta hydrolase
MSMEG_0718	189.963	1.3438	0.141244	9.51407	1.83339e-21	7.05383e-21	109.955	108.514	102.655	280.708	273.198	264.749	MSMEG_RS03500	AMP-binding protein
MSMEG_1143	183.288	1.34328	0.145381	9.23972	2.47134e-20	9.17203e-20	108.614	102.636	101.563	239.706	267.584	279.622	MSMEG_RS05570	MCE family protein
MSMEG_6082	3653.78	1.34231	0.0732622	18.322	5.52609e-75	5.75244e-74	2193.28	2026.05	1978.3	5352.38	5183.28	5189.37	MSMEG_RS29335	carbonic anhydrase
MSMEG_2997	131.409	1.34122	0.167517	8.00645	1.18067e-15	3.70369e-15	67.9395	76.8642	78.0836	195.55	179.637	190.381	MSMEG_RS14555	thioesterase family protein
MSMEG_3685	1826.98	1.34087	0.0848696	15.7991	3.15379e-56	2.55206e-55	1021.77	1078.81	995.43	2844.93	2484.98	2535.94	MSMEG_RS17890	hypothetical protein
MSMEG_5407	139.211	1.3401	0.170516	7.85905	3.87056e-15	1.18559e-14	79.1137	74.1513	84.0901	182.933	232.031	182.944	MSMEG_RS26050	membrane protein
MSMEG_0641	2868.45	1.33859	0.067423	19.8536	1.02568e-87	1.26146e-86	1647.98	1625.45	1599.9	4229.55	4032.48	4075.34	MSMEG_RS03120	ABC transporter permease
MSMEG_2948	141.619	1.33846	0.162876	8.21771	2.07431e-16	6.69751e-16	78.6667	79.1249	80.8138	230.244	188.993	191.868	MSMEG_RS14315	enoyl-CoA hydratase/isomerase family protein
MSMEG_0362	364.803	1.33832	0.116183	11.519	1.05788e-30	5.24586e-30	199.349	197.134	224.422	529.876	499.616	538.421	MSMEG_RS01785	amidohydrolase family protein
MSMEG_4852	20.9253	1.33771	0.422239	3.16814	0.00153416	0.00246841	14.75	9.49499	10.9208	37.8483	16.841	35.6964	MSMEG_RS23380	enoyl-CoA hydratase/isomerase family protein
MSMEG_4971	440.525	1.33417	0.118047	11.302	1.28291e-29	6.18268e-29	221.25	255.46	272.474	665.499	623.116	605.352	MSMEG_RS23965	nitronate monooxygenase
MSMEG_4062	139.845	1.33277	0.202234	6.5902	4.39221e-11	1.14257e-10	67.4925	68.7256	104.294	176.625	215.19	206.742	MSMEG_RS19665	amidase
MSMEG_4593	404.35	1.33218	0.124868	10.6687	1.4263e-26	6.3428e-26	229.296	211.15	245.172	665.499	520.199	554.782	MSMEG_RS22180	acyl-CoA dehydrogenase family protein
MSMEG_6489	22.014	1.33	0.381562	3.48567	0.000490914	0.000824655	13.4091	12.2078	12.0129	28.3862	39.2956	26.7723	MSMEG_RS31300	FAD binding domain-containing protein
MSMEG_2042	132.503	1.32874	0.178342	7.45051	9.29798e-14	2.69816e-13	75.538	84.5506	64.4327	211.32	170.281	188.894	MSMEG_RS09910	phosphotransferase family protein
MSMEG_6715	349.557	1.32715	0.136084	9.75239	1.80172e-22	7.15191e-22	231.531	183.57	180.193	539.338	465.934	496.776	MSMEG_RS32365	TIM barrel protein
MSMEG_1131	5072.56	1.32605	0.0931943	14.2289	6.06222e-46	4.13426e-45	2678.69	2755.81	3240.74	7683.21	7151.8	6925.11	MSMEG_RS05510	tryptophan-rich sensory protein
MSMEG_2387	944.135	1.32585	0.107167	12.3718	3.71366e-35	2.07569e-34	503.735	528.102	577.71	1526.55	1306.11	1222.6	MSMEG_RS11565	3-isopropylmalate dehydratase large subunit
MSMEG_3161	33.1252	1.32353	0.351525	3.7651	0.000166481	0.000291398	24.1364	16.2771	16.9272	44.1564	31.8107	65.4435	MSMEG_RS15350	DUF4333 domain-containing protein
MSMEG_3791	1326.19	1.3197	0.077634	16.999	8.3528e-65	7.65399e-64	756.72	744.678	773.192	1914.49	1938.58	1829.44	MSMEG_RS18380	50S ribosomal protein L20
MSMEG_6146	157.389	1.31951	0.176158	7.49051	6.86071e-14	2.0025e-13	96.0986	78.2206	92.8267	274.4	187.122	215.666	MSMEG_RS29655	IS1380-like element ISMsm3 family transposase
MSMEG_4050	20.7177	1.31757	0.479361	2.7486	0.00598506	0.00908935	10.7273	10.8514	15.2891	18.9242	14.9698	53.5447	MSMEG_RS19620	hypothetical protein
MSMEG_4137	8.48752	1.31636	0.604692	2.17691	0.029487	0.040992	5.36364	5.42571	4.36832	6.30805	13.0985	16.3609	MSMEG_RS20015	hypothetical protein
MSMEG_1219	37.3383	1.3159	0.298962	4.40157	1.07472e-05	2.0547e-05	24.5834	21.2507	18.5653	47.3104	61.7503	50.57	MSMEG_RS05940	branched-chain amino acid ABC transporter permease
MSMEG_2215	9.24615	1.31493	0.611795	2.1493	0.0316104	0.0437197	4.02273	4.52142	8.19059	6.30805	13.0985	19.3356	MSMEG_RS10750	acyl--CoA ligase
MSMEG_4009	12.4998	1.31427	0.494306	2.65882	0.00784143	0.0117441	7.59849	7.23428	6.55247	18.9242	16.841	17.8482	MSMEG_RS19430	2Fe-2S iron-sulfur cluster binding domain-containing protein
MSMEG_3338	62.1813	1.31371	0.275701	4.76497	1.88883e-06	3.81994e-06	32.6288	42.5014	29.4861	113.545	95.4322	59.4941	MSMEG_RS16215	NADH:flavin oxidoreductase/NADH oxidase
MSMEG_0700	672.124	1.31284	0.104684	12.541	4.45262e-36	2.53445e-35	346.849	411.45	400.793	943.054	928.125	1002.48	MSMEG_RS03415	hypothetical protein
MSMEG_2078	5431.89	1.31214	0.0736673	17.8117	5.73361e-71	5.67776e-70	3251.71	3165	2937.69	7926.07	7417.52	7893.38	MSMEG_RS10090	esterase family protein
MSMEG_5697	1092.02	1.31206	0.0863032	15.2029	3.38274e-52	2.56804e-51	619.501	610.844	652.517	1507.62	1657.9	1503.71	MSMEG_RS27455	YccF domain-containing protein
MSMEG_4681	3146.61	1.31171	0.0751463	17.4554	3.12997e-68	3.01682e-67	1706.53	1804.5	1908.95	4608.03	4402.98	4448.67	MSMEG_RS22580	hypothetical protein
MSMEG_4028	27.3826	1.30941	0.345945	3.78502	0.000153697	0.000269675	15.197	17.6336	15.2891	31.5403	35.5532	49.0826	MSMEG_RS19510	hypothetical protein
MSMEG_6296	64.4261	1.3083	0.228874	5.71624	1.08904e-08	2.4922e-08	37.5455	34.3628	38.2228	104.083	86.0761	86.2664	MSMEG_RS30375	alcohol dehydrogenase catalytic domain-containing protein
MSMEG_4430	147.615	1.30804	0.168262	7.77381	7.61591e-15	2.31106e-14	90.288	72.7949	91.7346	217.628	194.607	218.641	MSMEG_RS21420	helix-turn-helix transcriptional regulator
MSMEG_1078	645.751	1.30768	0.104248	12.5439	4.29344e-36	2.44598e-35	367.856	363.975	383.32	946.208	819.594	993.551	MSMEG_RS05245	HAD-IA family hydrolase
MSMEG_5460	22.3123	1.3069	0.376365	3.47241	0.000515804	0.000864903	11.1743	13.5643	13.651	34.6943	28.0683	32.7217	MSMEG_RS26305	hypothetical protein
MSMEG_3403	112.046	1.30534	0.192568	6.77858	1.21366e-11	3.22948e-11	66.1516	67.3692	63.3406	123.007	159.054	193.356	MSMEG_RS16550	formamidase
MSMEG_5981	21.3945	1.30487	0.404266	3.22776	0.00124765	0.00202475	14.75	8.5907	13.1049	37.8483	24.3259	29.747	MSMEG_RS28830	glycosyl transferase
MSMEG_6531	7.94096	1.30428	0.718278	1.81584	0.0693946	0.0913745	1.78788	6.32999	4.91435	18.9242	11.2273	4.46206	MSMEG_RS31500	cytochrome C oxidase subunit IV family protein
MSMEG_1120	50.2838	1.30401	0.291911	4.46716	7.92652e-06	1.53163e-05	34.4167	22.155	28.9401	85.1587	80.4625	50.57	MSMEG_RS05455	carbon-nitrogen hydrolase family protein
MSMEG_1094	82.424	1.30375	0.216995	6.00819	1.8761e-09	4.46775e-09	49.1667	40.2407	51.3277	141.931	104.788	107.089	MSMEG_RS05325	urease subunit alpha
MSMEG_4056	80.005	1.3036	0.237573	5.48715	4.08459e-08	9.04813e-08	39.7803	50.6399	44.7752	154.547	101.046	89.2411	MSMEG_RS19635	NAD(P)H-binding protein
MSMEG_0697	311.977	1.30305	0.132939	9.80183	1.10562e-22	4.41027e-22	169.402	165.032	204.219	479.412	413.54	440.256	MSMEG_RS03400	phage holin family protein
MSMEG_1774	2186.95	1.30238	0.106482	12.231	2.12241e-34	1.15648e-33	1197.88	1126.29	1460.66	3207.64	3160.49	2968.75	MSMEG_RS08625	DUF4383 domain-containing protein
MSMEG_5929	53.4916	1.30062	0.256191	5.07676	3.83918e-07	8.05731e-07	28.6061	27.1285	36.5846	82.0047	76.72	69.9055	MSMEG_RS28580	polyphosphate polymerase domain-containing protein
MSMEG_0300	156.072	1.29884	0.15772	8.23509	1.79417e-16	5.80741e-16	87.1592	97.6627	84.6361	236.552	205.834	224.59	MSMEG_RS01480	amidohydrolase family protein
MSMEG_4862	3.92034	1.29875	0.893562	1.45346	0.146097	0.18127	3.12879	2.71285	1.09208	3.15403	7.48488	5.94941	MSMEG_RS23430	coniferyl-alcohol dehydrogenase
MSMEG_4237	3877.75	1.29839	0.0660276	19.6643	4.35754e-86	5.20186e-85	2265.69	2262.97	2197.26	5510.08	5366.66	5663.84	MSMEG_RS20500	DUF3040 domain-containing protein
MSMEG_0788	383.856	1.29723	0.112818	11.4984	1.34391e-30	6.64828e-30	225.72	213.411	223.33	596.111	531.427	513.136	MSMEG_RS03845	hypothetical protein
MSMEG_6446	338.138	1.29685	0.14129	9.17865	4.36519e-20	1.60997e-19	206.053	182.665	196.574	533.03	385.471	525.035	MSMEG_RS31100	hypothetical protein
MSMEG_4167	151.971	1.29677	0.155855	8.32037	8.76919e-17	2.87707e-16	91.6289	82.742	90.0965	211.32	211.448	224.59	MSMEG_RS20160	Zn-dependent alcohol dehydrogenase
MSMEG_2987	44.3453	1.29467	0.267714	4.83604	1.3245e-06	2.70131e-06	25.0303	26.2243	26.2099	59.9265	61.7503	66.9308	MSMEG_RS14505	integral membrane protein
MSMEG_4916	3062.47	1.29401	0.0800281	16.1695	8.28305e-59	6.99864e-58	1711	1700.96	1907.86	4548.1	4281.35	4225.57	MSMEG_RS23695	alpha-1,4-glucan--maltose-1-phosphate maltosyltransferase
MSMEG_4328	15845.2	1.29325	0.0810477	15.9567	2.5604e-57	2.10328e-56	8397.23	9324.98	9833.08	21706	22327.4	23482.3	MSMEG_RS20955	beta-ketoacyl-ACP synthase
MSMEG_2031	3.28519	1.29301	0.987317	1.30963	0.190323	0.230756	2.68182	1.80857	1.09208	6.30805	1.87122	5.94941	MSMEG_RS09855	hypothetical protein
MSMEG_4665	335.746	1.29235	0.125748	10.2773	8.91852e-25	3.75073e-24	203.818	193.065	182.923	542.492	426.638	465.541	MSMEG_RS22505	TIM barrel protein
MSMEG_RS00375	308.703	1.29203	0.151473	8.52976	1.46651e-17	4.93082e-17	185.046	195.778	158.351	410.023	377.986	525.035	MSMEG_RS00375	hypothetical protein
MSMEG_3398	141.963	1.29086	0.171072	7.54569	4.4991e-14	1.32508e-13	87.6062	84.5506	72.0772	233.398	185.251	188.894	MSMEG_RS16520	MHS family MFS transporter
MSMEG_1705	254.462	1.29071	0.124725	10.3484	4.25371e-25	1.80644e-24	147.053	150.111	145.246	365.867	363.017	355.477	MSMEG_RS08320	ATP-binding cassette domain-containing protein
MSMEG_0237	173.375	1.29064	0.15049	8.57628	9.79866e-18	3.31859e-17	99.6743	102.636	98.2871	252.322	265.713	221.615	MSMEG_RS01165	IS1380-like element ISMsm3 family transposase
MSMEG_4036	50.2118	1.2902	0.267402	4.82494	1.40046e-06	2.85354e-06	29.0531	29.8414	27.302	88.3127	52.3942	74.3676	MSMEG_RS19550	ATP-dependent acyl-CoA ligase
MSMEG_6864	34.1543	1.29014	0.346214	3.72642	0.000194217	0.000338216	26.3712	14.4686	17.4733	63.0805	37.4244	46.1079	MSMEG_RS33090	helix-turn-helix domain-containing protein
MSMEG_1284	352.488	1.2899	0.150442	8.5741	9.98669e-18	3.38051e-17	232.871	218.385	161.082	523.568	458.449	520.573	MSMEG_RS06275	type II toxin-antitoxin system VapC family toxin
MSMEG_4830	83.0693	1.28969	0.209723	6.14949	7.77335e-10	1.89911e-09	51.4016	42.5014	49.1435	135.623	114.144	105.602	MSMEG_RS23280	hypothetical protein
MSMEG_5983	16.1137	1.28892	0.499308	2.58141	0.00983964	0.0145492	10.7273	7.68642	8.19059	41.0023	11.2273	17.8482	MSMEG_RS28840	glucose-1-phosphate thymidylyltransferase RfbA
MSMEG_6108	127.323	1.28826	0.178788	7.20548	5.78396e-13	1.62973e-12	80.9016	78.2206	64.4327	157.701	183.38	199.305	MSMEG_RS29465	zinc-binding dehydrogenase
MSMEG_2530	30.0552	1.28755	0.356529	3.61135	0.000304609	0.000520974	18.7727	19.4421	12.5589	56.7725	43.0381	29.747	MSMEG_RS12270	carboxymuconolactone decarboxylase family protein
MSMEG_3420	28.376	1.28731	0.33966	3.79	0.00015065	0.000264756	16.9849	18.0857	13.651	47.3104	35.5532	38.6712	MSMEG_RS16635	SDR family oxidoreductase
MSMEG_1081	5.048	1.28623	0.842767	1.5262	0.126959	0.159151	0.89394	4.52142	3.82228	3.15403	7.48488	10.4115	MSMEG_RS05260	hypothetical protein
MSMEG_4773	24.1547	1.2857	0.371979	3.45637	0.000547505	0.000915228	11.1743	16.2771	14.197	41.0023	28.0683	34.2091	MSMEG_RS23000	amidohydrolase family protein
MSMEG_5977	148.02	1.28547	0.164932	7.79394	6.49534e-15	1.97655e-14	90.288	75.5078	93.9188	198.704	209.577	220.128	MSMEG_RS28805	dTDP-4-dehydrorhamnose 3,5-epimerase
MSMEG_2007	122.727	1.2844	0.176873	7.26171	3.82221e-13	1.08307e-12	77.7728	68.2735	70.4391	151.393	172.152	196.33	MSMEG_RS09735	fumarylacetoacetate hydrolase family protein
MSMEG_1079	3.42594	1.28369	0.943756	1.36019	0.17377	0.211832	2.68182	1.35643	2.18416	3.15403	3.74244	7.43676	MSMEG_RS05250	hypothetical protein
MSMEG_4387	19.7722	1.28327	0.483749	2.65275	0.0079838	0.0119326	6.25758	9.94713	18.5653	25.2322	39.2956	19.3356	MSMEG_RS21225	ABC transporter permease
MSMEG_4477	330.231	1.28059	0.117789	10.8718	1.56996e-27	7.14089e-27	200.243	196.682	181.285	463.642	447.222	492.314	MSMEG_RS21635	adenylate/guanylate cyclase domain-containing protein
MSMEG_1487	203.529	1.27922	0.145005	8.82193	1.12508e-18	3.9481e-18	122.917	110.323	124.497	264.938	321.85	276.647	MSMEG_RS07265	zf-HC2 domain-containing protein
MSMEG_1605	2778.23	1.27868	0.110012	11.6231	3.14549e-31	1.5864e-30	1397.23	1575.26	1893.12	4024.54	3880.91	3898.35	MSMEG_RS07840	phosphate signaling complex protein PhoU
MSMEG_3972	258.485	1.27865	0.126538	10.1049	5.25698e-24	2.17708e-23	145.265	151.92	153.437	391.099	361.145	348.04	MSMEG_RS19235	LysR family transcriptional regulator
MSMEG_5032	92.5579	1.27787	0.220221	5.80268	6.52637e-09	1.51159e-08	46.9319	47.0228	68.801	126.161	145.955	120.476	MSMEG_RS24270	transcriptional regulator
MSMEG_3635	67.0545	1.27683	0.221678	5.75983	8.41998e-09	1.93776e-08	40.2273	40.2407	37.1307	91.4667	101.046	92.2158	MSMEG_RS17645	iron ABC transporter permease
MSMEG_6022	20.9793	1.27679	0.484767	2.63382	0.00844291	0.0125812	18.3258	10.8514	6.55247	37.8483	37.4244	14.8735	MSMEG_RS29035	ROK family transcriptional regulator
MSMEG_6245	62.4189	1.27663	0.240017	5.31889	1.04401e-07	2.26185e-07	38.4394	29.8414	41.499	88.3127	84.2049	92.2158	MSMEG_RS30125	MFS transporter
MSMEG_1866	162.687	1.2762	0.151018	8.45065	2.89688e-17	9.64046e-17	97.4395	97.2106	90.0965	230.244	239.516	221.615	MSMEG_RS09070	IS3 family transposase
MSMEG_4649	292.561	1.27482	0.159618	7.98668	1.38627e-15	4.334e-15	189.515	155.085	167.088	419.485	494.002	330.192	MSMEG_RS22430	phytanoyl-CoA dioxygenase family protein
MSMEG_3869	40.1286	1.27316	0.305626	4.16574	3.10344e-05	5.76721e-05	29.5	18.0857	23.4797	47.3104	67.3639	55.032	MSMEG_RS18755	DUF4129 domain-containing protein
MSMEG_1637	2456.15	1.27294	0.0798085	15.9499	2.85214e-57	2.33998e-56	1376.67	1462.23	1480.31	3239.18	3671.33	3507.18	MSMEG_RS07995	sensor histidine kinase
MSMEG_5916	22.4016	1.27293	0.387203	3.28751	0.00101076	0.00165102	10.7273	15.3728	13.651	25.2322	41.1668	28.2597	MSMEG_RS28515	hypothetical protein
MSMEG_2195	235.141	1.27266	0.146201	8.70485	3.18004e-18	1.10226e-17	151.97	122.078	137.056	350.097	353.661	295.983	MSMEG_RS10650	TetR/AcrR family transcriptional regulator
MSMEG_6774	24.2474	1.27178	0.375768	3.38449	0.000713108	0.00118023	11.1743	16.7293	14.7431	31.5403	43.0381	28.2597	MSMEG_RS32655	enoyl-CoA hydratase/isomerase family protein
MSMEG_3905	478.972	1.27127	0.119864	10.606	2.79499e-26	1.23199e-25	282.932	279.424	282.302	652.883	596.919	779.372	MSMEG_RS18935	DUF503 family protein
MSMEG_3904	3754.17	1.27012	0.0980154	12.9584	2.1061e-38	1.26289e-37	2034.61	2290.1	2285.18	4743.65	5263.74	5907.76	MSMEG_RS18930	hypothetical protein
MSMEG_3540	5996.37	1.26913	0.0933908	13.5894	4.62555e-42	2.97076e-41	3670.97	3553.84	3316.1	9540.93	8089.28	7807.11	MSMEG_RS17195	hypothetical protein
MSMEG_4070	39.2233	1.26821	0.307836	4.11977	3.79249e-05	6.99375e-05	18.3258	28.9371	20.7495	66.2345	50.5229	50.57	MSMEG_RS19695	TetR/AcrR family transcriptional regulator
MSMEG_5768	290.273	1.2681	0.150469	8.42762	3.52758e-17	1.17034e-16	140.796	192.16	179.647	397.407	377.986	453.642	MSMEG_RS27805	TetR/AcrR family transcriptional regulator
MSMEG_4982	37.4738	1.26698	0.2985	4.2445	2.19079e-05	4.10403e-05	24.1364	19.4421	23.4797	41.0023	61.7503	55.032	MSMEG_RS24020	hypothetical protein
MSMEG_0588	47.559	1.26596	0.278187	4.55074	5.34574e-06	1.04789e-05	27.2652	23.9635	33.3084	66.2345	54.2654	80.317	MSMEG_RS02855	MFS transporter
MSMEG_4776	32.6228	1.26451	0.31876	3.96696	7.27952e-05	0.000131156	22.3485	16.2771	19.6574	37.8483	50.5229	49.0826	MSMEG_RS23015	VOC family protein
MSMEG_4549	11.6412	1.26315	0.585301	2.15812	0.0309184	0.0428446	5.81061	7.68642	6.55247	25.2322	3.74244	20.8229	MSMEG_RS21965	APC family permease
MSMEG_4554	171.595	1.26203	0.152444	8.27867	1.24558e-16	4.06092e-16	107.72	91.3327	104.84	230.244	254.486	240.951	MSMEG_RS21990	sensor domain-containing protein
MSMEG_2559	5.79051	1.26103	0.754917	1.67042	0.0948357	0.121672	4.91667	3.61714	2.18416	3.15403	7.48488	13.3862	MSMEG_RS12410	ferredoxin
MSMEG_1870	183.401	1.26091	0.147157	8.56848	1.04862e-17	3.54223e-17	108.614	103.088	111.392	277.554	232.031	267.723	MSMEG_RS09085	hypothetical protein
MSMEG_0268	456.035	1.26061	0.106711	11.8133	3.33137e-32	1.71743e-31	261.031	273.094	267.559	697.04	638.086	599.403	MSMEG_RS01320	GntR family transcriptional regulator
MSMEG_0272	4.4546	1.25902	0.840003	1.49883	0.133919	0.167328	3.12879	2.26071	2.18416	9.46208	3.74244	5.94941	MSMEG_RS01340	BMC domain-containing protein
MSMEG_4041	826.897	1.25884	0.115332	10.9149	9.78235e-28	4.48197e-27	504.629	463.446	488.705	1346.77	991.747	1166.08	MSMEG_RS19575	hydroxyquinol 1,2-dioxygenase
MSMEG_1308	9.43662	1.25822	0.582928	2.15844	0.0308935	0.0428192	5.81061	5.87785	4.36832	18.9242	11.2273	10.4115	MSMEG_RS06395	CocE/NonD family hydrolase
MSMEG_3023	217.231	1.25669	0.140375	8.95234	3.48021e-19	1.24957e-18	116.212	135.191	134.326	299.632	293.782	324.243	MSMEG_RS14685	hypothetical protein
MSMEG_5483	1289.54	1.2546	0.118913	10.5506	5.04621e-26	2.20488e-25	886.342	747.843	653.063	1690.56	1816.95	1942.48	MSMEG_RS26420	MspA family porin
MSMEG_3355	176.193	1.25429	0.184087	6.81357	9.5208e-12	2.54907e-11	120.682	100.828	86.8203	309.095	207.705	232.027	MSMEG_RS16315	NmrA family NAD(P)-binding protein
MSMEG_6036	266.21	1.25428	0.128816	9.73701	2.09633e-22	8.30617e-22	157.78	146.494	168.18	378.483	353.661	392.661	MSMEG_RS29100	biphenyl-2,3-diol 1,2-dioxygenase
MSMEG_5145	162.097	1.25339	0.164058	7.6399	2.17391e-14	6.50872e-14	105.485	92.237	89.0044	242.86	194.607	248.388	MSMEG_RS24810	extracellular solute-binding protein
MSMEG_0516	27.5849	1.25281	0.340487	3.67945	0.000233733	0.000403147	14.75	18.5378	16.3812	31.5403	41.1668	43.1332	MSMEG_RS02510	sugar ABC transporter permease
MSMEG_2975	1163.7	1.25029	0.0801923	15.5912	8.35726e-55	6.63077e-54	693.698	686.352	682.003	1722.1	1603.64	1594.44	MSMEG_RS14450	MBL fold metallo-hydrolase
MSMEG_5137	64.3117	1.24953	0.229432	5.44618	5.14618e-08	1.1338e-07	35.7576	38.8842	39.8609	85.1587	102.917	83.2917	MSMEG_RS24770	respiratory nitrate reductase subunit gamma
MSMEG_0476	53.3623	1.24856	0.268937	4.64258	3.44085e-06	6.83129e-06	32.1819	28.0328	33.3084	85.1587	87.9473	53.5447	MSMEG_RS02325	glycosyltransferase
MSMEG_2432	41.7176	1.24772	0.283343	4.40357	1.06483e-05	2.03758e-05	25.0303	21.2507	28.3941	53.6184	65.4927	56.5194	MSMEG_RS11790	D-alanyl-D-alanine carboxypeptidase
MSMEG_1779	104.385	1.24699	0.211232	5.9034	3.56095e-09	8.37885e-09	54.0834	59.6828	69.347	189.242	114.144	139.811	MSMEG_RS08650	hypothetical protein
MSMEG_5595	47.6965	1.24281	0.266184	4.669	3.02671e-06	6.03486e-06	31.2879	30.2935	23.4797	63.0805	71.1064	66.9308	MSMEG_RS26965	MarR family transcriptional regulator
MSMEG_2006	117.294	1.2427	0.175534	7.07955	1.44621e-12	4.01925e-12	70.6213	75.0556	63.3406	160.855	170.281	163.609	MSMEG_RS09730	VOC family protein
MSMEG_1778	532.887	1.24166	0.15003	8.27603	1.27346e-16	4.1488e-16	271.311	282.137	395.333	820.047	735.389	693.106	MSMEG_RS08645	hypothetical protein
MSMEG_6624	12.2219	1.24133	0.576045	2.15492	0.0311684	0.0431634	7.15152	9.04285	6.00643	15.7701	5.61366	29.747	MSMEG_RS31940	nuclear transport factor 2 family protein
MSMEG_0583	79.7023	1.24113	0.208133	5.96312	2.47464e-09	5.86307e-09	48.7197	47.4749	45.3213	113.545	123.501	99.6526	MSMEG_RS02835	hypothetical protein
MSMEG_3969	20.195	1.23889	0.395201	3.13483	0.00171957	0.00275826	11.1743	12.2078	12.5589	31.5403	22.4546	31.2344	MSMEG_RS19225	nuclear transport factor 2 family protein
MSMEG_4327	34474.5	1.23776	0.075181	16.4638	6.68122e-61	5.81413e-60	19171.4	20316.6	22107	48083.1	47489.7	49679	MSMEG_RS20950	beta-ketoacyl-ACP synthase
MSMEG_5456	60.3837	1.23762	0.252836	4.89496	9.83243e-07	2.01989e-06	28.6061	38.8842	40.4069	91.4667	69.2351	93.7032	MSMEG_RS26290	LpqN/LpqT family lipoprotein
MSMEG_4981	12.6463	1.23591	0.535576	2.30762	0.0210203	0.0297753	5.81061	10.3993	6.00643	18.9242	24.3259	10.4115	MSMEG_RS24015	phosphotransferase family protein
MSMEG_4801	28.8944	1.23539	0.334007	3.6987	0.000216709	0.000375276	18.7727	14.4686	18.5653	41.0023	37.4244	43.1332	MSMEG_RS23135	mycofactocin-coupled SDR family oxidoreductase
MSMEG_4020	4.40627	1.23501	0.865245	1.42735	0.153478	0.189654	3.12879	1.80857	2.7302	9.46208	1.87122	7.43676	MSMEG_RS19480	enoyl-CoA hydratase/isomerase family protein
MSMEG_2388	419.597	1.23142	0.119398	10.3136	6.11658e-25	2.58238e-24	281.144	231.949	239.711	577.187	568.851	618.738	MSMEG_RS11570	3-isopropylmalate dehydratase small subunit
MSMEG_5988	483.828	1.23116	0.115205	10.6867	1.17523e-26	5.23342e-26	315.561	270.833	277.388	741.196	621.245	676.745	MSMEG_RS28865	hypothetical protein
MSMEG_2230	31.0047	1.22968	0.335776	3.6622	0.000250062	0.000430171	20.1137	15.825	20.2035	34.6943	58.0078	37.1838	MSMEG_RS10810	amidohydrolase
MSMEG_6626	21.1858	1.22909	0.400521	3.06874	0.00214961	0.00340857	14.303	12.2078	10.3747	41.0023	22.4546	26.7723	MSMEG_RS31950	SDR family oxidoreductase
MSMEG_2950	127.942	1.22888	0.180466	6.80951	9.79319e-12	2.61984e-11	75.538	78.2206	76.4455	160.855	218.933	157.659	MSMEG_RS14325	FAD binding domain-containing protein
MSMEG_5653	45.1976	1.22857	0.266073	4.61743	3.88515e-06	7.68291e-06	27.7122	25.32	28.3941	59.9265	67.3639	62.4688	MSMEG_RS27250	cytosine permease
MSMEG_2850	121.191	1.22809	0.17328	7.08734	1.3671e-12	3.80262e-12	73.3031	72.7949	69.347	192.396	157.182	162.121	MSMEG_RS13820	nitroreductase family deazaflavin-dependent oxidoreductase
MSMEG_4904	689.272	1.2274	0.0918382	13.3648	9.70803e-41	6.09657e-40	398.25	418.684	423.727	927.284	971.163	996.526	MSMEG_RS23635	rhomboid family intramembrane serine protease
MSMEG_2989	208.112	1.22701	0.142439	8.61432	7.03602e-18	2.4017e-17	125.599	119.818	131.049	255.476	323.721	293.008	MSMEG_RS14515	substrate-binding domain-containing protein
MSMEG_1601	2087.04	1.22552	0.0750661	16.3259	6.45558e-60	5.56292e-59	1275.21	1275.95	1201.83	2873.32	2849.87	3046.1	MSMEG_RS07820	DUF5319 domain-containing protein
MSMEG_1707	77.0749	1.22546	0.215024	5.6992	1.20371e-08	2.74591e-08	40.2273	51.9964	46.9594	100.929	112.273	110.064	MSMEG_RS08330	HAD family hydrolase
MSMEG_4037	13.6785	1.22539	0.530621	2.30935	0.0209244	0.0296653	9.38637	9.04285	5.46039	28.3862	7.48488	22.3103	MSMEG_RS19555	ester cyclase
MSMEG_3874	93.4508	1.22392	0.192833	6.34703	2.19516e-10	5.51805e-10	58.5531	54.2571	56.7881	113.545	142.213	135.349	MSMEG_RS18780	TetR/AcrR family transcriptional regulator
MSMEG_4408	13.9635	1.22389	0.475882	2.57183	0.0101161	0.0149343	8.49243	9.49499	7.64455	12.6161	26.1971	19.3356	MSMEG_RS21320	DUF417 family protein
MSMEG_2849	144.452	1.22274	0.197166	6.20154	5.59118e-10	1.37737e-09	101.015	91.7849	66.6168	211.32	168.41	227.565	MSMEG_RS13815	helix-turn-helix transcriptional regulator
MSMEG_4545	22.8526	1.22127	0.414645	2.94534	0.00322602	0.00502116	12.5152	14.9207	14.7431	15.7701	52.3942	26.7723	MSMEG_RS21940	ABC transporter substrate-binding protein
MSMEG_2261	411.157	1.22087	0.129958	9.39438	5.75568e-21	2.17965e-20	269.076	265.408	206.949	545.646	581.949	597.916	MSMEG_RS10955	DUF1641 domain-containing protein
MSMEG_0380	622.571	1.22041	0.113812	10.723	7.93637e-27	3.54873e-26	401.826	393.364	323.801	895.743	898.186	822.506	MSMEG_RS01880	MmpS family protein
MSMEG_6117	10.9264	1.21992	0.53968	2.26045	0.023793	0.0334481	6.70455	8.13856	5.46039	9.46208	14.9698	20.8229	MSMEG_RS29510	glucarate dehydratase
MSMEG_5978	43.0657	1.21667	0.27181	4.4762	7.59843e-06	1.46998e-05	25.9243	27.1285	25.1178	56.7725	58.0078	65.4435	MSMEG_RS28815	PIG-L family deacetylase
MSMEG_1608	199.294	1.21249	0.146248	8.29061	1.12667e-16	3.68161e-16	123.364	116.653	123.951	233.398	306.88	291.521	MSMEG_RS07855	glycoside hydrolase family 65 protein
MSMEG_0854	380.486	1.21219	0.130307	9.30261	1.37045e-20	5.12715e-20	241.811	244.609	199.85	567.725	469.676	559.244	MSMEG_RS04165	HAMP domain-containing protein
MSMEG_RS33495	9.61792	1.21191	0.696004	1.74123	0.0816425	0.106	5.36364	7.23428	6.00643	0	9.3561	29.747	MSMEG_RS33495	transporter MFS superfamily protein
MSMEG_1175	36.6536	1.21108	0.31121	3.89152	9.96195e-05	0.000177325	23.6894	23.9635	20.2035	31.5403	65.4927	55.032	MSMEG_RS05725	helix-turn-helix transcriptional regulator
MSMEG_0545	40.1267	1.21039	0.295228	4.09985	4.13417e-05	7.598e-05	21.9015	23.5114	27.848	47.3104	71.1064	49.0826	MSMEG_RS02650	adenylate/guanylate cyclase domain-containing protein
MSMEG_0179	57.282	1.21039	0.247023	4.89991	9.58828e-07	1.9716e-06	39.3334	30.2935	33.3084	85.1587	84.2049	71.3929	MSMEG_RS00880	GntR family transcriptional regulator
MSMEG_6714	6.1573	1.20805	0.739513	1.63357	0.102349	0.130566	4.4697	4.06928	3.27624	3.15403	5.61366	16.3609	MSMEG_RS32360	nuclear transport factor 2 family protein
MSMEG_4192	995.286	1.20803	0.0839158	14.3957	5.50688e-47	3.83185e-46	581.955	597.732	626.307	1356.23	1427.74	1381.75	MSMEG_RS20285	DUF3090 domain-containing protein
MSMEG_5395	478.546	1.20733	0.112821	10.7012	1.00424e-26	4.47506e-26	261.478	303.387	304.69	656.037	636.215	709.467	MSMEG_RS25995	sensor histidine kinase KdpD
MSMEG_2844	18.761	1.20668	0.416424	2.89773	0.00375879	0.00581838	12.0682	9.04285	12.5589	31.5403	20.5834	26.7723	MSMEG_RS13790	ABC transporter ATP-binding protein
MSMEG_0609	179.559	1.20643	0.151738	7.95074	1.85395e-15	5.76291e-15	100.568	105.349	118.491	274.4	230.16	248.388	MSMEG_RS02960	helix-turn-helix domain-containing protein
MSMEG_2524	12.4612	1.20616	0.554733	2.17431	0.0296819	0.0412364	4.91667	12.2078	6.00643	9.46208	24.3259	17.8482	MSMEG_RS12245	ABC transporter ATP-binding protein
MSMEG_0720	8.27038	1.20581	0.604463	1.99485	0.0460596	0.062326	4.91667	5.87785	4.36832	9.46208	13.0985	11.8988	MSMEG_RS03515	membrane protein
MSMEG_3694	821.495	1.20241	0.0951671	12.6347	1.3588e-36	7.86506e-36	485.857	500.522	500.718	1267.92	1070.34	1103.62	MSMEG_RS17935	long-chain fatty acid--CoA ligase
MSMEG_4024	563.644	1.20202	0.103449	11.6194	3.28302e-31	1.65192e-30	336.569	351.767	330.9	870.511	741.003	751.113	MSMEG_RS19495	TetR/AcrR family transcriptional regulator
MSMEG_2682	333.938	1.20108	0.120483	9.96885	2.08629e-23	8.48339e-23	185.493	219.289	202.581	463.642	471.547	461.079	MSMEG_RS13010	FadR family transcriptional regulator
MSMEG_4178	216.83	1.20035	0.18102	6.63105	3.33315e-11	8.71251e-11	155.993	131.573	103.201	350.097	308.751	251.362	MSMEG_RS20210	flavodoxin family protein
MSMEG_6584	149.764	1.20008	0.177969	6.74319	1.54949e-11	4.10632e-11	106.826	80.9335	86.2742	179.779	239.516	205.255	MSMEG_RS31745	acyl-CoA dehydrogenase family protein
MSMEG_5284	847.352	1.19925	0.0902872	13.2827	2.91877e-40	1.82066e-39	498.372	542.571	499.626	1195.38	1216.29	1131.87	MSMEG_RS25475	patatin-like phospholipase family protein
MSMEG_2832	62.9226	1.19812	0.23742	5.04642	4.50162e-07	9.40813e-07	37.0985	39.7885	36.0386	107.237	71.1064	86.2664	MSMEG_RS13730	hypothetical protein
MSMEG_3599	832.222	1.19724	0.167662	7.14079	9.2793e-13	2.60108e-12	620.395	541.214	353.288	1195.38	1094.66	1188.39	MSMEG_RS17475	sugar ABC transporter xylitol/D-threitol-binding protein ThpA
MSMEG_4998	314.011	1.19531	0.141051	8.4743	2.36507e-17	7.89895e-17	168.508	187.187	220.6	384.791	475.29	447.693	MSMEG_RS24105	alpha/beta fold hydrolase
MSMEG_4929	14800.3	1.19523	0.282624	4.22903	2.34696e-05	4.39026e-05	7115.76	11303.6	8575.55	15035.2	24789.9	21981.6	MSMEG_RS23760	5S ribosomal RNA
MSMEG_4102	54.3524	1.19493	0.255254	4.68134	2.85011e-06	5.69671e-06	35.7576	34.3628	28.3941	75.6966	87.9473	63.9561	MSMEG_RS19855	acyl-CoA/acyl-ACP dehydrogenase
MSMEG_6633	5.2245	1.19327	0.76908	1.55155	0.120769	0.151919	4.4697	2.71285	2.7302	3.15403	9.3561	8.92411	MSMEG_RS31985	malonate decarboxylase acyl carrier protein
MSMEG_1162	16.9217	1.19296	0.453901	2.62825	0.0085826	0.0127718	11.6212	12.2078	6.55247	25.2322	28.0683	17.8482	MSMEG_RS05665	LLM class flavin-dependent oxidoreductase
MSMEG_6855	10.233	1.19186	0.592143	2.01278	0.0441374	0.059862	6.25758	6.32999	4.91435	25.2322	11.2273	7.43676	MSMEG_RS33045	isocitrate lyase/PEP mutase family protein
MSMEG_0487	14.7474	1.19173	0.486121	2.45151	0.0142258	0.0206453	9.38637	6.78213	9.82871	31.5403	13.0985	17.8482	MSMEG_RS02375	ABC transporter permease
MSMEG_6760	290.272	1.19151	0.124518	9.56897	1.07976e-21	4.18399e-21	178.341	176.788	174.187	403.715	439.737	368.863	MSMEG_RS32590	SRPBCC domain-containing protein
MSMEG_6213	1385.99	1.19144	0.104716	11.3778	5.39227e-30	2.62787e-29	767.448	833.75	927.721	2113.2	1747.72	1926.12	MSMEG_RS29965	manganese catalase family protein
MSMEG_6302	152.693	1.19111	0.155622	7.65389	1.94987e-14	5.84872e-14	95.6516	89.072	96.1029	195.55	215.19	224.59	MSMEG_RS30405	ATP-dependent DNA ligase
MSMEG_4973	704.592	1.19053	0.0896281	13.283	2.90491e-40	1.81376e-39	414.788	435.865	436.286	996.672	978.648	965.291	MSMEG_RS23975	VOC family protein
MSMEG_1501	1827.57	1.18951	0.0862859	13.7857	3.10775e-43	2.04646e-42	1202.35	1113.17	1027.65	2469.6	2612.22	2540.4	MSMEG_RS07335	SAM-dependent methyltransferase
MSMEG_5849	838.973	1.18705	0.100865	11.7687	5.66033e-32	2.89741e-31	495.69	497.809	537.303	1271.07	1186.35	1045.61	MSMEG_RS28185	bifunctional ribonuclease/(p)ppGpp synthase
MSMEG_0163	2.95459	1.18653	1.01976	1.16354	0.24461	0.290142	1.78788	1.80857	2.18416	0	7.48488	4.46206	MSMEG_RS00805	hypothetical protein
MSMEG_1200	130.832	1.18509	0.204119	5.80587	6.40332e-09	1.48415e-08	81.7955	97.2106	62.2485	148.239	209.577	185.919	MSMEG_RS05850	transporter substrate-binding domain-containing protein
MSMEG_5699	333.128	1.18479	0.119126	9.94574	2.63198e-23	1.06756e-22	219.909	191.256	198.758	473.104	447.222	468.516	MSMEG_RS27465	MoaD/ThiS family protein
MSMEG_3396	344.498	1.18434	0.135534	8.73831	2.36627e-18	8.24142e-18	220.356	206.177	199.85	570.879	404.184	465.541	MSMEG_RS16510	helix-turn-helix domain-containing protein
MSMEG_2566	16.1763	1.18238	0.446755	2.6466	0.00813066	0.0121354	9.38637	11.7557	8.73663	22.0782	16.841	28.2597	MSMEG_RS12445	SDR family oxidoreductase
MSMEG_6527	23.2696	1.18171	0.396637	2.97933	0.00288876	0.00451568	10.2803	12.66	19.6574	34.6943	35.5532	26.7723	MSMEG_RS31480	TetR/AcrR family transcriptional regulator
MSMEG_6393	2035.24	1.18143	0.0712403	16.5838	9.13043e-62	8.08199e-61	1249.73	1209.48	1279.37	2788.16	2842.38	2842.33	MSMEG_RS30840	fadD32
MSMEG_4367	579.703	1.18115	0.109401	10.7966	3.57279e-27	1.60974e-26	384.394	357.192	318.887	861.049	780.299	776.398	MSMEG_RS21130	acetamidase/formamidase family protein
MSMEG_5354	285.169	1.17961	0.169181	6.97248	3.11406e-12	8.54135e-12	214.099	173.171	135.964	406.869	355.532	425.383	MSMEG_RS25805	O-methyltransferase
MSMEG_1173	30.3901	1.17789	0.325145	3.62267	0.00029158	0.000499348	17.8788	16.7293	21.8416	37.8483	44.9093	43.1332	MSMEG_RS05715	helix-turn-helix transcriptional regulator
MSMEG_6023	16.7022	1.17727	0.496209	2.37253	0.0176665	0.0253448	12.9621	6.78213	11.4668	22.0782	11.2273	35.6964	MSMEG_RS29040	IS110 family transposase
MSMEG_0465	560.519	1.17468	0.112058	10.4827	1.03714e-25	4.47161e-25	342.379	320.569	364.208	879.973	731.647	724.34	MSMEG_RS02265	TetR/AcrR family transcriptional regulator
MSMEG_4676	0.478234	1.17419	2.47381	0.474649	0.635037	0.68324	0	0.452142	0.546039	0	1.87122	0	MSMEG_RS22560	tRNA-Gly
MSMEG_2419	532.141	1.17395	0.108672	10.8026	3.34419e-27	1.50987e-26	303.94	317.856	360.932	709.656	767.2	733.265	MSMEG_RS11725	bifunctional DNA-formamidopyrimidine glycosylase/DNA-(apurinic or apyrimidinic site) lyase
MSMEG_4022	140.182	1.17187	0.196959	5.94981	2.68455e-09	6.34884e-09	89.394	85.907	80.2678	220.782	226.418	138.324	MSMEG_RS19485	TetR/AcrR family transcriptional regulator
MSMEG_3806	741.368	1.17081	0.0966831	12.1098	9.3745e-34	5.06987e-33	438.031	470.68	453.759	1119.68	1006.72	959.342	MSMEG_RS18445	winged helix DNA-binding domain-containing protein
MSMEG_1521	1660.07	1.17055	0.0955825	12.2465	1.75432e-34	9.58322e-34	1078.99	922.822	1058.22	2469.6	2138.8	2292.01	MSMEG_RS07435	30S ribosomal protein S13
MSMEG_5730	84.8564	1.1702	0.207839	5.63029	1.7991e-08	4.06421e-08	54.9773	52.9007	51.3277	91.4667	121.629	136.836	MSMEG_RS27625	NCS1 family nucleobase:cation symporter-1
MSMEG_6107	224.405	1.16781	0.174582	6.68915	2.24465e-11	5.89809e-11	175.659	116.653	122.859	293.324	325.592	312.344	MSMEG_RS29460	LLM class flavin-dependent oxidoreductase
MSMEG_5667	517.276	1.16571	0.135603	8.59649	8.21879e-18	2.7937e-17	271.758	313.335	372.945	690.732	791.526	663.359	MSMEG_RS27310	NAD(P)/FAD-dependent oxidoreductase
MSMEG_0491	471.169	1.16433	0.131138	8.87862	6.76923e-19	2.39481e-18	337.462	260.886	270.836	712.81	595.048	649.973	MSMEG_RS02395	LacI family DNA-binding transcriptional regulator
MSMEG_6472	26.3293	1.1639	0.351884	3.30764	0.000940865	0.00154111	19.6667	15.3728	14.197	31.5403	35.5532	41.6459	MSMEG_RS31215	hypothetical protein
MSMEG_0872	26.9675	1.16345	0.386844	3.00754	0.00263376	0.00413694	23.2424	15.3728	10.3747	44.1564	37.4244	31.2344	MSMEG_RS04255	(2Fe-2S)-binding protein
MSMEG_3782	86.8277	1.16235	0.197985	5.87089	4.33459e-09	1.01442e-08	54.5304	51.5442	56.2421	107.237	123.501	127.912	MSMEG_RS18340	reactive intermediate/imine deaminase
MSMEG_3843	81.1872	1.16219	0.227821	5.10134	3.37255e-07	7.09402e-07	53.6364	47.4749	45.8673	151.393	93.561	95.1905	MSMEG_RS18630	OB-fold domain-containing protein
MSMEG_0787	318.74	1.16114	0.123426	9.40761	5.0755e-21	1.92319e-20	199.796	186.735	201.489	469.95	460.32	394.148	MSMEG_RS03840	transporter substrate-binding domain-containing protein
MSMEG_2902	478.386	1.16093	0.10961	10.5914	3.26495e-26	1.43526e-25	305.728	296.153	288.855	589.803	727.905	661.872	MSMEG_RS14080	carbon-nitrogen hydrolase family protein
MSMEG_5332	20.769	1.16071	0.388301	2.98919	0.00279716	0.00437986	14.303	12.66	12.0129	25.2322	26.1971	34.2091	MSMEG_RS25695	TetR/AcrR family transcriptional regulator
MSMEG_3554	46.6566	1.16063	0.282825	4.1037	4.06591e-05	7.48311e-05	22.7955	30.2935	33.8544	66.2345	52.3942	74.3676	MSMEG_RS17265	TIGR03842 family LLM class F420-dependent oxidoreductase
MSMEG_0725	249.034	1.15915	0.145705	7.95547	1.78447e-15	5.54959e-15	176.553	145.138	139.24	362.713	310.623	359.939	MSMEG_RS03535	IS3 family transposase
MSMEG_3707	154.498	1.15844	0.177217	6.53689	6.28112e-11	1.62291e-10	93.4168	104.445	90.0965	182.933	265.713	190.381	MSMEG_RS17985	hypothetical protein
MSMEG_3726	87.995	1.15773	0.203395	5.69202	1.25543e-08	2.85989e-08	55.4243	56.9699	51.3277	123.007	102.917	138.324	MSMEG_RS18070	PQQ-dependent methanol/ethanol family dehydrogenase
MSMEG_0643	14973.4	1.15701	0.0855332	13.527	1.08396e-41	6.90721e-41	9321.12	9265.3	9218.78	23109.5	19099.5	19826.4	MSMEG_RS03130	ABC transporter substrate-binding protein
MSMEG_4543	16.2719	1.15565	0.496602	2.32712	0.019959	0.0283584	7.15152	13.5643	10.9208	6.30805	29.9395	29.747	MSMEG_RS21935	ABC transporter permease
MSMEG_5889	1510.99	1.15468	0.0917885	12.5798	2.72784e-36	1.56226e-35	924.334	916.04	977.957	1854.57	2165	2228.05	MSMEG_RS28390	hypothetical protein
MSMEG_4836	23.3635	1.15132	0.375712	3.06436	0.00218137	0.00345557	11.6212	18.0857	14.197	28.3862	33.682	34.2091	MSMEG_RS23310	acyl-CoA/acyl-ACP dehydrogenase
MSMEG_3462	164.888	1.15116	0.156592	7.35133	1.96242e-13	5.62198e-13	96.5456	97.2106	115.214	214.474	226.418	239.464	MSMEG_RS16820	oxidoreductase
MSMEG_2251	185.686	1.15081	0.171448	6.71231	1.91572e-11	5.05228e-11	121.576	105.349	114.122	318.557	250.743	203.767	MSMEG_RS10910	response regulator
MSMEG_0182	194.278	1.1504	0.15804	7.27916	3.35915e-13	9.53519e-13	113.53	128.408	121.221	239.706	321.85	240.951	MSMEG_RS00895	epoxide hydrolase
MSMEG_6024	374.968	1.1503	0.111455	10.3208	5.67698e-25	2.40146e-24	224.826	236.923	239.711	492.028	508.972	547.346	MSMEG_RS29050	acetoacetate--CoA ligase
MSMEG_4093	104.008	1.14863	0.219835	5.22498	1.74178e-07	3.72518e-07	81.3486	60.1349	50.7817	164.009	123.501	144.273	MSMEG_RS19810	aldo/keto reductase
MSMEG_5859	39.2378	1.14809	0.326239	3.51915	0.000432929	0.000730455	27.7122	25.32	18.0193	72.5426	56.1366	35.6964	MSMEG_RS28240	aldehyde dehydrogenase
MSMEG_5729	63.8337	1.14688	0.251751	4.55563	5.22282e-06	1.0241e-05	33.5228	43.8578	44.2292	59.9265	104.788	96.6779	MSMEG_RS27620	aspartate/glutamate racemase family protein
MSMEG_0982	226.977	1.14686	0.14746	7.7774	7.40307e-15	2.24752e-14	154.205	129.765	138.694	312.249	351.789	275.16	MSMEG_RS04780	TAXI family TRAP transporter solute-binding subunit
MSMEG_6890	6.00492	1.14685	0.828081	1.38496	0.166066	0.203393	5.81061	4.52142	0.546039	9.46208	11.2273	4.46206	MSMEG_RS33220	antibiotic biosynthesis monooxygenase
MSMEG_4406	10.9342	1.14649	0.5492	2.08757	0.036837	0.0505396	5.36364	5.87785	9.82871	9.46208	18.7122	16.3609	MSMEG_RS21310	UsfY protein
MSMEG_6688	114.621	1.14622	0.179368	6.39031	1.65545e-10	4.19243e-10	69.2804	66.4649	79.7218	145.085	166.539	160.634	MSMEG_RS32250	PucR family transcriptional regulator
MSMEG_3896	1837.17	1.14612	0.0930094	12.3227	6.83938e-35	3.7961e-34	1161.68	1171.5	1089.35	2766.08	2569.19	2265.24	MSMEG_RS18890	ubiquitin-like protein Pup
MSMEG_4415	11.5633	1.14548	0.520597	2.20033	0.0277835	0.038773	8.04546	6.78213	6.55247	18.9242	11.2273	17.8482	MSMEG_RS21345	transaldolase
MSMEG_6865	89.9788	1.14421	0.260066	4.3997	1.08402e-05	2.07065e-05	56.7652	72.3428	37.1307	151.393	97.3034	124.938	MSMEG_RS33095	ABC transporter substrate-binding protein
MSMEG_6224	129.945	1.14371	0.166854	6.85456	7.15331e-12	1.9271e-11	79.5607	86.8113	76.9916	170.317	188.993	176.995	MSMEG_RS30025	carotenoid oxygenase family protein
MSMEG_0856	147.76	1.14295	0.184554	6.19303	5.90178e-10	1.45168e-09	81.7955	87.7156	104.294	249.168	162.796	200.793	MSMEG_RS04170	response regulator transcription factor
MSMEG_RS08815	0.0910066	1.14274	4.08047	0.280052	0.779438	0.812924	0	0	0.546039	0	0	0	MSMEG_RS08815	hypothetical protein
MSMEG_RS33685	0.074495	1.14274	4.08047	0.280052	0.779438	0.812924	0.44697	0	0	0	0	0	MSMEG_RS33685	hypothetical protein
MSMEG_4003	260.302	1.14136	0.123953	9.20806	3.32082e-20	1.22827e-19	160.015	165.936	161.082	362.713	346.176	365.889	MSMEG_RS19400	DUF4380 domain-containing protein
MSMEG_4276	2808.47	1.14114	0.0737961	15.4634	6.12418e-54	4.81207e-53	1840.18	1724.02	1688.35	3999.3	3770.51	3828.44	MSMEG_RS20700	branched-chain amino acid aminotransferase
MSMEG_1936	919.527	1.14108	0.094096	12.1267	7.62464e-34	4.13038e-33	565.864	536.241	618.117	1286.84	1302.37	1207.73	MSMEG_RS09400	DUF3152 domain-containing protein
MSMEG_5074	116.504	1.13983	0.220569	5.16769	2.37009e-07	5.03587e-07	64.3637	70.0821	80.8138	195.55	179.637	108.577	MSMEG_RS24475	TetR family transcriptional regulator
MSMEG_2180	35.639	1.13844	0.303288	3.75366	0.000174269	0.000304456	23.2424	24.4157	18.5653	53.6184	44.9093	49.0826	MSMEG_RS10575	isoprenylcysteine carboxylmethyltransferase family protein
MSMEG_5154	122.729	1.13844	0.200796	5.66963	1.43107e-08	3.24974e-08	75.091	62.8478	90.6425	186.088	183.38	138.324	MSMEG_RS24850	DUF1059 domain-containing protein
MSMEG_2359	313.32	1.13747	0.123716	9.19416	3.77946e-20	1.39632e-19	188.621	191.708	210.771	397.407	422.896	468.516	MSMEG_RS11425	methionine synthase
MSMEG_4872	4.27405	1.13529	0.887036	1.27987	0.200592	0.242484	4.02273	2.26071	2.18416	0	11.2273	5.94941	MSMEG_RS23480	SDR family NAD(P)-dependent oxidoreductase
MSMEG_5622	6.41773	1.13513	0.714805	1.58803	0.11228	0.142119	5.81061	4.06928	2.7302	3.15403	9.3561	13.3862	MSMEG_RS27095	acyl-CoA dehydrogenase family protein
MSMEG_4286	3619.14	1.13447	0.084675	13.398	6.21372e-41	3.91729e-40	2070.37	2319.04	2403.12	5159.99	5050.42	4711.93	MSMEG_RS20745	lipoyl synthase
MSMEG_3463	59.8873	1.13383	0.241312	4.69861	2.61941e-06	5.24365e-06	35.3106	36.1714	39.3148	97.7748	82.3337	68.4182	MSMEG_RS16825	esterase
MSMEG_5602	30.2811	1.13351	0.356489	3.17964	0.00147459	0.00237703	16.9849	20.7985	21.2955	18.9242	48.6517	55.032	MSMEG_RS26995	DUF1232 domain-containing protein
MSMEG_5058	1099.41	1.13252	0.0904256	12.5243	5.49757e-36	3.12377e-35	729.008	702.177	634.498	1488.7	1568.08	1473.97	MSMEG_RS24395	sn-glycerol-3-phosphate ABC transporter ATP-binding protein UgpC
MSMEG_6737	781.08	1.13248	0.0949172	11.9312	8.13863e-33	4.27706e-32	487.197	468.872	508.909	1148.07	993.618	1079.82	MSMEG_RS32470	DUF732 domain-containing protein
MSMEG_3686	686.717	1.13245	0.102263	11.0739	1.67953e-28	7.82739e-28	408.084	448.073	440.108	861.049	933.739	1029.25	MSMEG_RS17895	hypothetical protein
MSMEG_5558	27.6976	1.1317	0.376402	3.00663	0.00264162	0.00414729	16.9849	21.7028	12.5589	41.0023	48.6517	25.285	MSMEG_RS26785	hypothetical protein
MSMEG_5631	47.0862	1.131	0.293205	3.85735	0.000114623	0.000203253	25.9243	36.6235	24.0257	85.1587	54.2654	56.5194	MSMEG_RS27140	cyclohexanecarboxylate-CoA ligase
MSMEG_1513	326.912	1.13088	0.117966	9.58653	9.10977e-22	3.54051e-21	213.652	201.655	202.581	416.331	445.35	481.902	MSMEG_RS07395	LLM class F420-dependent oxidoreductase
MSMEG_0326	125.336	1.13073	0.178427	6.3372	2.33973e-10	5.87507e-10	76.4319	78.2206	77.5376	211.32	155.311	153.197	MSMEG_RS01605	AMP-binding protein
MSMEG_0515	64.0755	1.13061	0.238613	4.73828	2.15537e-06	4.34143e-06	41.1213	41.5971	36.5846	104.083	67.3639	93.7032	MSMEG_RS02505	ABC transporter substrate-binding protein
MSMEG_1658	1175.62	1.13019	0.0832238	13.5801	5.25698e-42	3.37297e-41	732.137	749.2	724.594	1728.41	1568.08	1551.31	MSMEG_RS08095	inner membrane protein YhjD
MSMEG_3755	17578.2	1.12678	0.269126	4.18683	2.8288e-05	5.26435e-05	9376.09	13651.1	10102.8	17296.7	28493.1	26549.2	MSMEG_RS18200	5S ribosomal RNA
MSMEG_2361	198.176	1.12488	0.153375	7.3342	2.23048e-13	6.37309e-13	109.508	122.983	139.786	293.324	275.069	248.388	MSMEG_RS11435	MmcQ/YjbR family DNA-binding protein
MSMEG_2072	350.084	1.1246	0.118994	9.45087	3.36024e-21	1.28296e-20	214.099	207.533	241.349	454.18	494.002	489.339	MSMEG_RS10060	hydroxymethylglutaryl-CoA lyase
MSMEG_0513	27.3915	1.12315	0.453459	2.47684	0.0132552	0.0193186	16.5379	27.5807	8.19059	22.0782	54.2654	35.6964	MSMEG_RS02495	DMT family transporter
MSMEG_4571	960.563	1.12238	0.100594	11.1575	6.58061e-29	3.09569e-28	568.546	581.455	668.352	1258.46	1278.04	1408.52	MSMEG_RS22075	30S ribosomal protein S20
MSMEG_RS26760	195.129	1.12234	0.142505	7.87583	3.38499e-15	1.03832e-14	128.727	116.653	121.221	290.17	250.743	263.261	MSMEG_RS26760	hypothetical protein
MSMEG_3212	100.337	1.12188	0.187789	5.97417	2.31261e-09	5.48317e-09	66.1516	57.4221	64.9787	148.239	132.857	132.374	MSMEG_RS15600	phosphoribosyl-AMP cyclohydrolase
MSMEG_4095	21.3148	1.12061	0.391101	2.86527	0.00416658	0.00642212	15.197	11.3036	13.651	28.3862	35.5532	23.7976	MSMEG_RS19820	LLM class flavin-dependent oxidoreductase
MSMEG_1663	177.424	1.11971	0.157758	7.09766	1.2689e-12	3.53705e-12	123.364	116.201	95.0109	249.168	233.903	246.9	MSMEG_RS08120	Lrp/AsnC family transcriptional regulator
MSMEG_4619	42.6853	1.11939	0.325086	3.44335	0.000574555	0.00095823	19.6667	24.4157	35.4926	78.8506	41.1668	56.5194	MSMEG_RS22295	cytochrome P450
MSMEG_3523	24.619	1.11766	0.37121	3.01087	0.00260504	0.00409382	17.8788	14.9207	12.5589	44.1564	29.9395	28.2597	MSMEG_RS17120	hypothetical protein
MSMEG_1784	57.0899	1.11612	0.24593	4.53835	5.6696e-06	1.1087e-05	39.7803	37.5278	30.5782	75.6966	86.0761	72.8802	MSMEG_RS08675	DNA topoisomerase IB
MSMEG_0153	127.844	1.11561	0.173719	6.4219	1.34585e-10	3.42705e-10	78.6667	76.4121	86.2742	179.779	192.736	153.197	MSMEG_RS00755	2-dehydropantoate 2-reductase
MSMEG_2038	4788.52	1.11505	0.0743118	15.0051	6.80195e-51	5.08661e-50	3012.13	2982.33	3072.02	7008.24	6498.75	6157.64	MSMEG_RS09890	NAD(P)/FAD-dependent oxidoreductase
MSMEG_1978	863.118	1.11287	0.090322	12.3212	6.96749e-35	3.8612e-34	562.735	538.501	534.573	1223.76	1096.53	1222.6	MSMEG_RS09600	chaperonin GroEL
MSMEG_2189	223.153	1.1127	0.136847	8.13097	4.25862e-16	1.35551e-15	142.137	129.765	151.799	309.095	293.782	312.344	MSMEG_RS10615	allophanate hydrolase
MSMEG_0047	245.224	1.11223	0.131815	8.43784	3.23243e-17	1.07406e-16	163.144	159.154	141.424	346.943	334.948	325.73	MSMEG_RS00225	hypothetical protein
MSMEG_6944	114.257	1.11073	0.181672	6.11395	9.71971e-10	2.36133e-09	71.5152	64.2042	81.3599	157.701	159.054	151.71	MSMEG_RS33445	membrane protein insertion efficiency factor YidD
MSMEG_5630	33.0446	1.11042	0.3258	3.40828	0.000653745	0.00108502	22.7955	23.5114	18.0193	28.3862	50.5229	55.032	MSMEG_RS27135	GntR family transcriptional regulator
MSMEG_0786	574.096	1.11013	0.0951697	11.6648	1.92902e-31	9.77432e-31	356.682	360.81	374.583	763.274	808.367	780.86	MSMEG_RS03835	protein kinase
MSMEG_2234	32.3076	1.1099	0.339305	3.27109	0.00107133	0.00174645	18.7727	16.7293	26.7559	41.0023	35.5532	55.032	MSMEG_RS10830	acyl-CoA dehydrogenase family protein
MSMEG_4751	128.843	1.10941	0.202814	5.47006	4.49887e-08	9.94215e-08	92.0759	87.2635	63.3406	189.242	198.349	142.786	MSMEG_RS33590	hypothetical protein
MSMEG_6844	23.6738	1.10906	0.409172	2.7105	0.00671811	0.0101552	9.83334	20.3464	14.197	41.0023	22.4546	34.2091	MSMEG_RS32990	TRAP transporter substrate-binding protein
MSMEG_0399	1336.36	1.10879	0.0931805	11.8994	1.19239e-32	6.2411e-32	862.652	905.641	768.277	1873.49	1876.83	1731.28	MSMEG_RS01965	MbtH family protein
MSMEG_3814	1.08978	1.1081	1.69877	0.652299	0.514208	0.566064	0.44697	0.904285	0.546039	3.15403	0	1.48735	MSMEG_RS18490	tRNA-Cys
MSMEG_3356	134.929	1.10694	0.181338	6.10428	1.03264e-09	2.50218e-09	97.8865	82.742	73.7153	201.858	192.736	160.634	MSMEG_RS16320	nitroreductase family deazaflavin-dependent oxidoreductase
MSMEG_3142	890.149	1.10664	0.115756	9.5601	1.1764e-21	4.55303e-21	531.894	520.868	636.136	1359.39	1191.97	1100.64	MSMEG_RS15255	TetR/AcrR family transcriptional regulator
MSMEG_2341	121.741	1.1064	0.190283	5.8145	6.08172e-09	1.41162e-08	65.2576	81.3856	86.2742	148.239	194.607	154.685	MSMEG_RS11335	DUF2784 domain-containing protein
MSMEG_2107	728.76	1.10535	0.105352	10.492	9.40301e-26	4.06485e-25	489.879	486.505	407.891	1037.67	974.906	975.703	MSMEG_RS10225	DUF4185 domain-containing protein
MSMEG_3344	512.878	1.10342	0.128641	8.57754	9.69239e-18	3.28431e-17	350.425	314.239	305.782	816.893	697.965	591.966	MSMEG_RS16250	sulfite exporter TauE/SafE family protein
MSMEG_1410	932.189	1.10271	0.0847149	13.0167	9.83661e-39	5.98102e-38	595.364	574.221	610.472	1223.76	1304.24	1285.07	MSMEG_RS06890	mycofactocin-coupled SDR family oxidoreductase
MSMEG_4040	70.0389	1.10187	0.237451	4.6404	3.47731e-06	6.89947e-06	52.2955	39.3364	44.2292	72.5426	97.3034	114.526	MSMEG_RS19570	malonic semialdehyde reductase
MSMEG_2428	129.154	1.10086	0.18077	6.08984	1.13023e-09	2.72647e-09	71.5152	92.237	80.2678	201.858	168.41	160.634	MSMEG_RS11770	helix-turn-helix domain-containing protein
MSMEG_3995	33.2237	1.10035	0.347347	3.16787	0.0015356	0.00246986	26.8182	19.4421	15.8351	53.6184	52.3942	31.2344	MSMEG_RS19355	M20 family metallo-hydrolase
MSMEG_5678	66.2676	1.09827	0.227024	4.83766	1.31375e-06	2.68023e-06	42.9091	43.4057	42.045	75.6966	87.9473	105.602	MSMEG_RS27365	VOC family protein
MSMEG_1075	136.525	1.09772	0.16339	6.71838	1.83756e-11	4.85587e-11	88.5001	83.6463	90.6425	170.317	185.251	200.793	MSMEG_RS05230	1,4-dihydroxy-2-naphthoyl-CoA synthase
MSMEG_3789	60.4739	1.09646	0.250178	4.3827	1.17219e-05	2.23318e-05	37.0985	31.1978	47.5054	85.1587	78.5912	83.2917	MSMEG_RS18370	gluconate:proton symporter
MSMEG_6685	315.819	1.09525	0.130063	8.42093	3.73498e-17	1.23852e-16	209.182	210.698	183.469	419.485	480.904	391.174	MSMEG_RS32230	4-aminobutyrate--2-oxoglutarate transaminase
MSMEG_3548	29.8867	1.09368	0.403706	2.70911	0.00674643	0.0101933	21.0076	16.7293	21.8416	15.7701	35.5532	68.4182	MSMEG_RS17235	ectoine/hydroxyectoine ABC transporter permease subunit EhuC
MSMEG_3885	722.397	1.09362	0.089468	12.2236	2.32492e-34	1.26577e-33	471.554	445.36	464.68	999.826	993.618	959.342	MSMEG_RS18835	RNA helicase
MSMEG_1217	17.6433	1.09327	0.437115	2.50111	0.0123805	0.0181046	15.197	10.3993	8.19059	22.0782	26.1971	23.7976	MSMEG_RS05930	ABC transporter ATP-binding protein
MSMEG_6217	202.595	1.09294	0.154978	7.05222	1.7609e-12	4.87299e-12	137.667	108.966	140.878	280.708	290.039	257.312	MSMEG_RS29985	DUF4129 domain-containing protein
MSMEG_0431	102.458	1.09293	0.187357	5.8334	5.43088e-09	1.26416e-08	65.2576	70.5342	58.9723	151.393	134.728	133.862	MSMEG_RS02110	sirohydrochlorin chelatase
MSMEG_6588	83.3196	1.09122	0.201752	5.40871	6.348e-08	1.39058e-07	53.1894	53.3528	52.4198	116.699	121.629	102.627	MSMEG_RS31760	fumarylacetoacetate hydrolase family protein
MSMEG_6447	204.328	1.09087	0.166832	6.53873	6.20451e-11	1.60503e-10	154.205	125.696	114.668	236.552	275.069	319.781	MSMEG_RS31105	ESX-1 secretion-associated protein
MSMEG_3996	40.268	1.09029	0.318737	3.42066	0.000624684	0.0010389	28.6061	27.1285	19.1114	75.6966	52.3942	38.6712	MSMEG_RS19360	dihydropyrimidinase
MSMEG_0578	55.4585	1.09022	0.299599	3.63893	0.000273774	0.000469967	31.7349	33.0064	38.2228	116.699	65.4927	47.5953	MSMEG_RS02810	acyl-CoA dehydrogenase family protein
MSMEG_4031	19.3582	1.0897	0.418813	2.60188	0.00927147	0.0137498	12.0682	9.49499	14.7431	34.6943	24.3259	20.8229	MSMEG_RS19525	hypothetical protein
MSMEG_5621	12.6864	1.0895	0.508305	2.1434	0.0320812	0.0443425	7.15152	8.13856	9.82871	12.6161	13.0985	25.285	MSMEG_RS27090	acyl-CoA dehydrogenase
MSMEG_5931	45.6026	1.08791	0.287811	3.77996	0.000156855	0.000274844	29.0531	35.2671	21.8416	72.5426	59.879	55.032	MSMEG_RS28590	SDR family oxidoreductase
MSMEG_3158	1273.42	1.08788	0.091825	11.8473	2.22261e-32	1.14855e-31	871.592	836.463	734.969	1737.87	1740.23	1719.38	MSMEG_RS15335	methylmalonyl-CoA mutase small subunit
MSMEG_4799	7.76642	1.08707	0.663663	1.63799	0.101424	0.129513	4.02273	4.52142	6.00643	12.6161	14.9698	4.46206	MSMEG_RS23125	aldehyde dehydrogenase family protein
MSMEG_0295	14.4459	1.0869	0.486871	2.23242	0.0255873	0.0358619	12.9621	9.04285	6.00643	15.7701	20.5834	22.3103	MSMEG_RS01455	ferredoxin--NADP reductase
MSMEG_2485	11.8502	1.08662	0.547622	1.98426	0.0472269	0.0638259	7.15152	10.3993	4.91435	15.7701	22.4546	10.4115	MSMEG_RS12050	bifunctional 3-(3-hydroxy-phenyl)propionate/3-hydroxycinnamic acid hydroxylase
MSMEG_5945	112.291	1.08512	0.181322	5.9845	2.1706e-09	5.15211e-09	70.6213	71.4385	70.9851	179.779	144.084	136.836	MSMEG_RS28655	YdcF family protein
MSMEG_2919	309.867	1.08417	0.128317	8.44912	2.93501e-17	9.76237e-17	180.129	221.55	193.298	428.947	424.767	410.509	MSMEG_RS14170	ketopantoate reductase family protein
MSMEG_1704	358.216	1.08406	0.120054	9.02977	1.7204e-19	6.25303e-19	240.023	225.619	218.962	545.646	441.608	477.44	MSMEG_RS08315	sugar-binding protein
MSMEG_5464	75.5398	1.08377	0.223401	4.85123	1.22701e-06	2.5064e-06	41.1213	49.7357	56.2421	88.3127	104.788	113.039	MSMEG_RS26325	MFS transporter
MSMEG_4671	4153.41	1.08349	0.0785929	13.786	3.09262e-43	2.03856e-42	2786.86	2630.56	2569.66	5834.95	5233.8	5864.63	MSMEG_RS22535	ATP-dependent Clp protease ATP-binding subunit ClpX
MSMEG_4775	15.8004	1.08335	0.469325	2.30832	0.0209811	0.0297285	12.5152	10.3993	8.73663	9.46208	22.4546	31.2344	MSMEG_RS23010	enoyl-CoA hydratase/isomerase family protein
MSMEG_4101	14.8077	1.0827	0.46058	2.35074	0.0187361	0.0267675	8.49243	11.3036	9.28267	15.7701	18.7122	25.285	MSMEG_RS19850	ABC transporter substrate-binding protein
MSMEG_6627	231.679	1.08176	0.146027	7.40793	1.28282e-13	3.70605e-13	164.485	139.712	142.516	315.403	276.941	351.015	MSMEG_RS31955	nitroreductase family protein
MSMEG_0488	7.66136	1.0804	0.657818	1.64241	0.100506	0.128397	5.36364	5.87785	4.36832	3.15403	9.3561	17.8482	MSMEG_RS02380	ABC transporter ATP-binding protein
MSMEG_3489	303.152	1.0803	0.121651	8.88026	6.67025e-19	2.36236e-18	203.371	188.091	194.936	391.099	396.699	444.718	MSMEG_RS16955	SGNH/GDSL hydrolase family protein
MSMEG_6616	1300.88	1.08017	0.118581	9.10913	8.3049e-20	3.04061e-19	742.864	806.17	952.293	2005.96	1641.06	1656.91	MSMEG_RS31900	glutathione-dependent formaldehyde dehydrogenase
MSMEG_1516	1356.4	1.07982	0.0796146	13.5631	6.63033e-42	4.23742e-41	901.092	870.374	844.723	1797.79	1805.73	1918.68	MSMEG_RS07410	FAD-dependent oxidoreductase
MSMEG_4845	13.042	1.07866	0.528714	2.04016	0.0413339	0.0562827	4.91667	8.5907	11.4668	18.9242	22.4546	11.8988	MSMEG_RS23350	acyl-CoA dehydrogenase
MSMEG_0642	3019.8	1.0786	0.0742372	14.529	7.93212e-48	5.64004e-47	1918.4	1986.26	1911.68	4339.94	3875.3	4087.24	MSMEG_RS03125	ABC transporter permease
MSMEG_6120	8.82281	1.07836	0.631865	1.70663	0.0878904	0.113478	5.81061	5.42571	6.00643	12.6161	3.74244	19.3356	MSMEG_RS29525	ATP-binding cassette domain-containing protein
MSMEG_3876	144.147	1.07831	0.176677	6.10328	1.03915e-09	2.51608e-09	98.3334	98.567	78.6297	211.32	211.448	166.583	MSMEG_RS18785	phosphotransferase
MSMEG_3793	2150.1	1.07815	0.0755967	14.2619	3.77976e-46	2.59674e-45	1323.03	1368.18	1453.56	2974.25	2930.33	2851.25	MSMEG_RS18390	translation initiation factor IF-3
MSMEG_2754	1849.38	1.07777	0.0791152	13.6227	2.93329e-42	1.89513e-41	1161.23	1186.87	1212.21	2680.92	2481.24	2373.81	MSMEG_RS13345	DUF3039 domain-containing protein
MSMEG_5410	284.251	1.07768	0.122467	8.79974	1.37129e-18	4.7914e-18	188.174	186.735	174.733	362.713	407.926	385.224	MSMEG_RS26065	radical SAM protein
MSMEG_3903	11178.2	1.07716	0.0934107	11.5314	9.1648e-31	4.55162e-30	6801.54	7380.32	7394.47	13407.8	15332.8	16752	MSMEG_RS18925	hypothetical protein
MSMEG_2232	15.2093	1.0765	0.524311	2.05316	0.0400567	0.0546235	5.81061	8.5907	15.2891	22.0782	11.2273	28.2597	MSMEG_RS10820	amidohydrolase family protein
MSMEG_1909	107.287	1.07585	0.20465	5.257	1.46427e-07	3.13992e-07	79.1137	65.5606	61.1564	148.239	172.152	117.501	MSMEG_RS09275	LysR family transcriptional regulator
MSMEG_3973	254.811	1.07561	0.133881	8.03412	9.42566e-16	2.96678e-15	176.106	168.197	146.885	353.251	327.464	356.964	MSMEG_RS19240	hydantoinase B/oxoprolinase family protein
MSMEG_3718	389.439	1.07481	0.111953	9.60058	7.94976e-22	3.09707e-21	266.394	242.348	240.803	558.263	512.714	516.111	MSMEG_RS18030	DUF1232 domain-containing protein
MSMEG_2619	4525.17	1.07289	0.0671423	15.9794	1.77846e-57	1.46649e-56	2910.22	2910.89	2932.78	5853.87	6367.76	6175.49	MSMEG_RS12710	MFS transporter
MSMEG_3041	377.091	1.07214	0.118336	9.06009	1.30337e-19	4.75055e-19	233.318	227.428	268.105	520.414	523.942	489.339	MSMEG_RS14775	class I SAM-dependent methyltransferase
MSMEG_0388	558.204	1.07147	0.113454	9.44413	3.58366e-21	1.36747e-20	405.849	333.681	337.998	788.506	741.003	742.189	MSMEG_RS01920	TylF/MycF family methyltransferase
MSMEG_4329	7035.58	1.07119	0.103019	10.398	2.531e-25	1.08333e-24	4110.34	4569.35	4941.11	8399.17	9728.47	10465	MSMEG_RS20960	acyl-CoA carboxylase subunit beta
MSMEG_1095	26.6296	1.0708	0.363754	2.94375	0.00324258	0.00504574	20.5606	14.9207	15.8351	41.0023	24.3259	43.1332	MSMEG_RS05330	urease accessory protein UreG
MSMEG_6106	180.234	1.07072	0.151884	7.04959	1.79446e-12	4.96376e-12	125.152	111.679	110.846	246.014	267.584	220.128	MSMEG_RS29455	alpha/beta hydrolase
MSMEG_1515	822.224	1.06903	0.103852	10.2937	7.52112e-25	3.1692e-24	581.955	534.884	472.87	1154.37	1079.69	1109.56	MSMEG_RS07405	cyclic nucleotide-binding domain-containing protein
MSMEG_1317	144.456	1.06902	0.157521	6.78651	1.1488e-11	3.06063e-11	92.9698	96.7585	91.1886	182.933	202.092	200.793	MSMEG_RS06435	GntR family transcriptional regulator
MSMEG_6601	105.966	1.06675	0.187118	5.70097	1.19128e-08	2.71851e-08	60.341	75.5078	69.347	148.239	136.599	145.76	MSMEG_RS31830	hypothetical protein
MSMEG_4423	13.7561	1.06617	0.61478	1.73423	0.0828773	0.107517	5.81061	7.68642	13.651	18.9242	3.74244	32.7217	MSMEG_RS21385	NADP-dependent oxidoreductase
MSMEG_6644	249.793	1.06569	0.133539	7.98036	1.45902e-15	4.55489e-15	171.19	162.771	147.431	369.021	325.592	322.755	MSMEG_RS32030	CoA ester lyase
MSMEG_1911	262.849	1.06493	0.148961	7.14903	8.73916e-13	2.45285e-12	152.864	163.676	190.022	403.715	364.888	301.932	MSMEG_RS09285	catechol 1,2-dioxygenase
MSMEG_4014	273.003	1.06455	0.144805	7.35158	1.95875e-13	5.61394e-13	177.447	164.58	189.476	369.021	310.623	426.87	MSMEG_RS19455	M20 family metallo-hydrolase
MSMEG_1731	84.7578	1.06387	0.204689	5.19748	2.02013e-07	4.30917e-07	54.5304	59.2306	51.8737	107.237	104.788	130.887	MSMEG_RS08435	IS256 family transposase
MSMEG_3314	238.148	1.06075	0.132907	7.98117	1.44954e-15	4.52963e-15	151.97	154.633	152.891	356.405	319.979	293.008	MSMEG_RS16085	MFS transporter
MSMEG_2763	703.017	1.06044	0.0929499	11.4087	3.78149e-30	1.8512e-29	455.91	472.037	436.832	987.21	903.799	962.317	MSMEG_RS13385	DUF4193 domain-containing protein
MSMEG_5304	419.41	1.05917	0.114424	9.25655	2.11147e-20	7.86748e-20	272.652	261.79	276.842	640.267	514.586	550.32	MSMEG_RS25560	sensor histidine kinase
MSMEG_1577	206.322	1.05812	0.154126	6.86529	6.63571e-12	1.79285e-11	148.841	122.983	126.135	324.865	248.872	266.236	MSMEG_RS07710	tRNA (adenosine(37)-N6)-threonylcarbamoyltransferase complex ATPase subunit type 1 TsaE
MSMEG_3289	2994.15	1.05805	0.0945739	11.1875	4.69313e-29	2.219e-28	1864.31	1780.99	2182.52	4198.01	3869.68	4069.4	MSMEG_RS15980	alpha/beta fold hydrolase
MSMEG_6175	9.63189	1.05792	0.631594	1.67501	0.0939331	0.12061	3.57576	6.32999	8.73663	12.6161	20.5834	5.94941	MSMEG_RS29790	2-dehydro-3-deoxygalactonokinase
MSMEG_3551	1612.5	1.05571	0.078175	13.5044	1.47329e-41	9.37891e-41	1064.68	1020.49	1054.4	2217.28	2256.69	2061.47	MSMEG_RS17250	cytochrome P450
MSMEG_5286	206.595	1.0511	0.140079	7.50366	6.20619e-14	1.8139e-13	133.644	139.26	129.411	296.478	250.743	290.034	MSMEG_RS25490	dihydrodipicolinate reductase
MSMEG_5776	3773.06	1.0507	0.08271	12.7034	5.65882e-37	3.29305e-36	2305.47	2463.72	2594.78	5472.23	4940.02	4862.15	MSMEG_RS27840	phosphate signaling complex protein PhoU
MSMEG_1721	153.044	1.05057	0.160674	6.53853	6.21269e-11	1.60651e-10	103.25	101.28	92.8267	227.09	179.637	214.179	MSMEG_RS08390	IS3 family transposase
MSMEG_3283	87.8423	1.05027	0.201209	5.21979	1.79125e-07	3.82974e-07	60.7879	56.5178	54.6039	119.853	102.917	132.374	MSMEG_RS15950	MFS transporter
MSMEG_3967	65.7216	1.04997	0.239034	4.39257	1.12017e-05	2.13719e-05	49.1667	40.6928	36.5846	104.083	87.9473	75.855	MSMEG_RS19220	YafY family transcriptional regulator
MSMEG_0640	2630.71	1.04933	0.0774771	13.5438	8.62552e-42	5.50173e-41	1719.05	1770.14	1651.77	3623.98	3323.29	3696.07	MSMEG_RS03115	ABC transporter ATP-binding protein
MSMEG_0842	29.7614	1.04864	0.341359	3.07195	0.00212663	0.0033746	21.9015	19.8943	16.9272	37.8483	29.9395	52.0573	MSMEG_RS04105	hypothetical protein
MSMEG_4385	52.0802	1.04859	0.249115	4.20926	2.56214e-05	4.78178e-05	35.7576	34.815	31.1242	69.3886	72.9776	68.4182	MSMEG_RS21215	ABC transporter substrate-binding protein
MSMEG_1509	18.5118	1.04836	0.415402	2.52373	0.0116116	0.01703	10.7273	14.0164	10.9208	28.3862	26.1971	20.8229	MSMEG_RS07375	helix-turn-helix transcriptional regulator
MSMEG_1197	3.28781	1.04808	0.977969	1.07169	0.283861	0.332218	1.78788	3.61714	1.09208	3.15403	5.61366	4.46206	MSMEG_RS05835	LuxR family transcriptional regulator
MSMEG_5275	12988.9	1.04786	0.0715293	14.6495	1.35802e-48	9.82793e-48	8050.38	8709.62	8644.9	17974.8	16573.4	17980.6	MSMEG_RS25430	Bax inhibitor-1/YccA family protein
MSMEG_0808	36.2203	1.04765	0.343782	3.04742	0.00230818	0.00365111	17.8788	24.4157	26.2099	75.6966	37.4244	35.6964	MSMEG_RS03935	polyketide synthase
MSMEG_5910	32.8252	1.04715	0.316004	3.31372	0.000920623	0.00150985	24.5834	18.5378	21.2955	44.1564	39.2956	49.0826	MSMEG_RS28490	VOC family protein
MSMEG_4878	2.50339	1.04677	1.09784	0.953481	0.340346	0.392257	1.78788	1.35643	2.18416	0	3.74244	5.94941	MSMEG_RS23505	2Fe-2S iron-sulfur cluster binding domain-containing protein
MSMEG_3617	51.1513	1.04652	0.25131	4.16428	3.12342e-05	5.80103e-05	36.2046	32.5542	31.6703	66.2345	67.3639	72.8802	MSMEG_RS17555	hypothetical protein
MSMEG_0558	642.519	1.04638	0.170541	6.13568	8.47977e-10	2.06782e-09	362.493	360.81	530.75	1056.6	727.905	816.556	MSMEG_RS02710	hypothetical protein
MSMEG_4030	14.1939	1.04266	0.513522	2.0304	0.0423158	0.0575714	9.83334	7.68642	9.28267	31.5403	7.48488	19.3356	MSMEG_RS19520	DUF417 family protein
MSMEG_3300	182.138	1.04224	0.167755	6.21286	5.20283e-10	1.2851e-09	126.046	107.158	119.037	305.94	226.418	208.229	MSMEG_RS16015	Gfo/Idh/MocA family oxidoreductase
MSMEG_0390	117.844	1.04213	0.185818	5.6083	2.04325e-08	4.60297e-08	77.3258	69.6299	86.8203	138.777	151.569	182.944	MSMEG_RS01930	acyltransferase
MSMEG_1085	17.9038	1.04075	0.453806	2.29338	0.0218264	0.0308366	12.0682	12.2078	12.5589	9.46208	22.4546	38.6712	MSMEG_RS05275	ABC transporter permease
MSMEG_1708	146.76	1.04068	0.166839	6.23762	4.44285e-10	1.10241e-09	92.9698	92.6892	101.017	205.012	220.804	168.071	MSMEG_RS08335	LacI family DNA-binding transcriptional regulator
MSMEG_2220	7.38616	1.04062	0.680393	1.52944	0.126155	0.158301	6.25758	5.87785	2.18416	9.46208	13.0985	7.43676	MSMEG_RS10775	enoyl-CoA hydratase/isomerase family protein
MSMEG_0591	50.6456	1.04006	0.266922	3.89651	9.75902e-05	0.000173904	32.6288	34.3628	32.2163	75.6966	48.6517	80.317	MSMEG_RS02870	rhamnulokinase
MSMEG_2099	32.1722	1.03995	0.312625	3.32651	0.00087941	0.00144517	20.5606	21.2507	21.8416	41.0023	39.2956	49.0826	MSMEG_RS10190	ABC transporter substrate-binding protein
MSMEG_3163	460.578	1.03993	0.111724	9.30805	1.30199e-20	4.87664e-20	319.137	297.962	292.131	545.646	651.185	657.41	MSMEG_RS15360	hypothetical protein
MSMEG_3915	273.864	1.03987	0.13206	7.87421	3.42907e-15	1.05135e-14	181.023	188.091	164.904	413.177	333.077	362.914	MSMEG_RS18980	NAD(P)-dependent alcohol dehydrogenase
MSMEG_5986	29.5658	1.03983	0.334481	3.1088	0.00187851	0.0029999	22.7955	16.7293	18.5653	41.0023	33.682	44.6206	MSMEG_RS28855	glutamine--fructose-6-phosphate transaminase (isomerizing)
MSMEG_4695	1092.07	1.03954	0.111268	9.34273	9.38844e-21	3.53071e-20	629.781	742.87	772.646	1501.32	1317.34	1588.49	MSMEG_RS22650	globin
MSMEG_3157	339.987	1.0388	0.125377	8.28539	1.17719e-16	3.84284e-16	221.697	225.167	226.06	403.715	439.737	523.548	MSMEG_RS15330	TVP38/TMEM64 family protein
MSMEG_1107	131.847	1.03816	0.180722	5.74453	9.21793e-09	2.11765e-08	92.5228	88.1678	75.3534	211.32	149.698	174.02	MSMEG_RS05390	DJ-1/PfpI family protein
MSMEG_0185	22.1717	1.03752	0.394444	2.63033	0.00853012	0.0127024	17.4318	14.9207	10.3747	34.6943	31.8107	23.7976	MSMEG_RS00910	RND family transporter
MSMEG_0148	26.715	1.03731	0.350226	2.96184	0.00305806	0.00476545	21.4546	16.2771	14.7431	34.6943	37.4244	35.6964	MSMEG_RS00730	TetR/AcrR family transcriptional regulator
MSMEG_6198	136.465	1.03721	0.170879	6.06987	1.28012e-09	3.07778e-09	92.9698	80.0292	97.7411	160.855	190.864	196.33	MSMEG_RS29905	helix-turn-helix domain-containing protein
MSMEG_2000	74.2129	1.03694	0.25718	4.03194	5.53178e-05	0.000100362	61.2349	51.0921	32.7624	100.929	108.531	90.7285	MSMEG_RS09700	nuclear transport factor 2 family protein
MSMEG_6796	22.5209	1.0364	0.416668	2.48735	0.0128699	0.0187907	15.644	14.4686	14.7431	18.9242	50.5229	20.8229	MSMEG_RS32760	nuclear transport factor 2 family protein
MSMEG_1343	43.039	1.03498	0.289908	3.57002	0.000356958	0.00060668	22.3485	32.1021	29.4861	63.0805	63.6215	47.5953	MSMEG_RS06555	tRNA-Trp
MSMEG_6836	13.3976	1.03307	0.496948	2.07883	0.0376331	0.0515238	8.04546	6.32999	12.0129	18.9242	18.7122	16.3609	MSMEG_RS32955	iron-sulfur cluster-binding domain-containing protein
MSMEG_1802	1298.51	1.0329	0.122352	8.44197	3.12036e-17	1.03736e-16	822.872	777.233	951.201	2053.27	1540.01	1646.5	MSMEG_RS08750	ChaB family protein
MSMEG_4166	118.743	1.03263	0.19077	5.41298	6.1984e-08	1.35964e-07	88.9471	67.3692	80.2678	129.315	174.023	172.533	MSMEG_RS20155	acyl-CoA dehydrogenase family protein
MSMEG_2303	242.054	1.03254	0.155794	6.62758	3.41235e-11	8.91596e-11	133.197	173.171	174.187	277.554	346.176	348.04	MSMEG_RS11160	OFA family MFS transporter
MSMEG_0603	310.455	1.03152	0.125587	8.21365	2.14573e-16	6.9178e-16	199.349	223.81	190.022	391.099	443.479	414.971	MSMEG_RS02930	acyl-CoA dehydrogenase
MSMEG_4846	3.84195	1.03123	0.899579	1.14634	0.251653	0.297845	2.23485	3.165	2.7302	0	7.48488	7.43676	MSMEG_RS23355	enoyl-CoA hydratase
MSMEG_2260	32.1409	1.03075	0.313495	3.28792	0.00100929	0.00164904	23.2424	19.4421	21.2955	37.8483	44.9093	46.1079	MSMEG_RS10950	AraC family transcriptional regulator
MSMEG_6016	163.231	1.02822	0.164108	6.26549	3.7166e-10	9.24673e-10	119.788	91.7849	110.3	227.09	205.834	224.59	MSMEG_RS29005	acyl-CoA/acyl-ACP dehydrogenase
MSMEG_2142	410.267	1.02807	0.117872	8.72187	2.73651e-18	9.50039e-18	290.978	264.503	252.816	580.341	495.873	577.093	MSMEG_RS10390	hypothetical protein
MSMEG_0147	84.9579	1.02716	0.208047	4.93717	7.92631e-07	1.63658e-06	58.5531	55.1614	51.3277	138.777	104.788	101.14	MSMEG_RS00725	sterol desaturase family protein
MSMEG_1717	162.264	1.02656	0.159662	6.42961	1.27933e-10	3.26533e-10	115.318	100.828	104.84	220.782	190.864	240.951	MSMEG_RS08380	IS30-like element ISMsm8 family transposase
MSMEG_6835	16.2192	1.02603	0.491879	2.08594	0.0369836	0.0507093	9.83334	9.04285	11.4668	37.8483	18.7122	10.4115	MSMEG_RS32950	fatty acid desaturase
MSMEG_6234	557.843	1.02578	0.105152	9.75523	1.75205e-22	6.96326e-22	384.841	365.331	350.011	756.966	802.753	687.157	MSMEG_RS30070	hypothetical protein
MSMEG_5818	50.5276	1.02532	0.276217	3.71203	0.000205607	0.000357	27.2652	32.1021	39.3148	85.1587	52.3942	66.9308	MSMEG_RS28035	MCE family protein
MSMEG_6587	365.013	1.02342	0.119693	8.55034	1.22722e-17	4.13908e-17	236.894	232.401	257.731	428.947	523.942	510.162	MSMEG_RS31765	ATP-dependent RNA helicase HrpA
MSMEG_4004	135.197	1.0206	0.165925	6.15097	7.70116e-10	1.88218e-09	94.3107	90.4285	81.3599	195.55	174.023	175.508	MSMEG_RS19405	SDR family oxidoreductase
MSMEG_0852	80.1387	1.01998	0.206505	4.93925	7.84227e-07	1.61974e-06	52.2955	49.2835	56.2421	116.699	106.66	99.6526	MSMEG_RS04155	CBS domain-containing protein
MSMEG_0538	1180.56	1.01952	0.103943	9.80841	1.03593e-22	4.13481e-22	820.637	783.563	743.16	1390.93	1566.21	1778.87	MSMEG_RS02615	MarR family transcriptional regulator
MSMEG_4398	86.8145	1.01888	0.234644	4.34223	1.41044e-05	2.67297e-05	69.7273	56.5178	46.4134	97.7748	147.826	102.627	MSMEG_RS21275	LLM class F420-dependent oxidoreductase
MSMEG_1563	136.854	1.01883	0.180505	5.64434	1.65816e-08	3.75233e-08	73.7501	97.2106	100.471	182.933	192.736	174.02	MSMEG_RS07645	SDR family oxidoreductase
MSMEG_2173	829.567	1.01806	0.101943	9.98657	1.74511e-23	7.10939e-23	589.107	515.442	535.665	1217.45	1023.56	1096.18	MSMEG_RS10540	FadR family transcriptional regulator
MSMEG_2988	61.2446	1.01661	0.247932	4.10036	4.12512e-05	7.58566e-05	37.9925	47.9271	34.4005	94.6208	69.2351	83.2917	MSMEG_RS14510	nitrilase family protein
MSMEG_4877	16.9406	1.01602	0.426143	2.38422	0.0171154	0.0245954	11.6212	11.3036	11.4668	15.7701	26.1971	25.285	MSMEG_RS23510	CoA transferase
MSMEG_6177	40.7645	1.01573	0.335508	3.02744	0.00246637	0.00388716	36.6516	28.0328	15.8351	53.6184	59.879	50.57	MSMEG_RS29800	galactonate dehydratase
MSMEG_2244	10.1138	1.01507	0.631351	1.60778	0.107884	0.137138	4.91667	4.97357	9.28267	22.0782	14.9698	4.46206	MSMEG_RS10880	Rieske (2Fe-2S) protein
MSMEG_1668	271.466	1.01499	0.148853	6.81874	9.18447e-12	2.46003e-11	162.697	188.091	185.107	425.793	293.782	373.325	MSMEG_RS08140	PPOX class F420-dependent oxidoreductase
MSMEG_3360	494.825	1.01474	0.11905	8.52359	1.54686e-17	5.19292e-17	329.417	352.671	294.861	747.504	628.73	615.764	MSMEG_RS16340	TetR/AcrR family transcriptional regulator
MSMEG_3126	1170.98	1.01332	0.080248	12.6273	1.49288e-36	8.61816e-36	779.069	782.206	762.817	1633.79	1498.85	1569.16	MSMEG_RS15180	SUF system NifU family Fe-S cluster assembly protein
MSMEG_4360	391.985	1.01221	0.113859	8.89001	6.11007e-19	2.16633e-18	244.94	269.477	261.553	574.033	490.26	511.649	MSMEG_RS21105	DUF4185 domain-containing protein
MSMEG_3365	256.959	1.01204	0.134851	7.50486	6.14943e-14	1.79812e-13	156.887	178.596	177.463	315.403	381.729	331.68	MSMEG_RS16365	GlxA family transcriptional regulator
MSMEG_4412	13.433	1.01204	0.506733	1.99718	0.0458055	0.0620338	7.59849	11.7557	6.55247	25.2322	13.0985	16.3609	MSMEG_RS21335	sulfite oxidase-like oxidoreductase
MSMEG_6742	67.9238	1.01139	0.249013	4.06159	4.87387e-05	8.89214e-05	46.0379	47.0228	38.7688	126.161	69.2351	80.317	MSMEG_RS32495	ABATE domain-containing protein
MSMEG_1585	50.3029	1.01132	0.274689	3.68167	0.000231709	0.000399866	37.5455	33.4585	31.6703	41.0023	74.8488	83.2917	MSMEG_RS07745	cupin domain-containing protein
MSMEG_3335	398.951	1.00892	0.135349	7.45417	9.04376e-14	2.62673e-13	279.803	288.015	224.422	574.033	469.676	557.757	MSMEG_RS16200	IclR family transcriptional regulator
MSMEG_4735	109.327	1.00563	0.210395	4.77974	1.75523e-06	3.55749e-06	60.7879	66.9171	91.7346	141.931	130.985	163.609	MSMEG_RS22850	glycosyltransferase family 2 protein
MSMEG_3542	3762.44	1.00541	0.0679873	14.7882	1.74606e-49	1.27927e-48	2434.65	2599.82	2473.56	4929.74	5121.53	5015.35	MSMEG_RS17200	hypothetical protein
MSMEG_1533	8.66198	1.00217	0.612894	1.63514	0.10202	0.130197	5.36364	4.52142	8.19059	6.30805	11.2273	16.3609	MSMEG_RS07500	type VII secretion system ESX-4 serine protease mycosin MycP4
MSMEG_5201	299.862	0.99996	0.145137	6.88978	5.58797e-12	1.51797e-11	180.576	184.926	230.975	457.334	377.986	367.376	MSMEG_RS25070	FadR family transcriptional regulator
MSMEG_5998	92.9573	0.998892	0.207024	4.82499	1.40007e-06	2.85354e-06	51.4016	65.1085	69.347	132.469	108.531	130.887	MSMEG_RS28915	nitroreductase family deazaflavin-dependent oxidoreductase
MSMEG_3285	210.839	0.99887	0.146622	6.81257	9.58693e-12	2.56572e-11	133.197	133.382	152.891	318.557	248.872	278.135	MSMEG_RS15960	isocitrate/isopropylmalate dehydrogenase family protein
MSMEG_3009	12.8735	0.998834	0.495343	2.01645	0.0437531	0.0593903	7.15152	10.8514	8.19059	12.6161	20.5834	17.8482	MSMEG_RS14615	glucose 1-dehydrogenase
MSMEG_3436	380.405	0.998117	0.121113	8.2412	1.70494e-16	5.52131e-16	237.788	263.147	265.921	444.718	514.586	556.27	MSMEG_RS16715	zeta toxin family protein
MSMEG_3367	86.1793	0.99772	0.203218	4.90961	9.12559e-07	1.87705e-06	63.9167	53.8049	54.0579	123.007	104.788	117.501	MSMEG_RS16375	SDR family oxidoreductase
MSMEG_4573	20.837	0.995811	0.407079	2.44623	0.0144357	0.020922	12.9621	13.1121	15.2891	28.3862	37.4244	17.8482	MSMEG_RS22085	ComEC/Rec2 family competence protein
MSMEG_2891	22.3948	0.994915	0.410217	2.42534	0.015294	0.0221167	12.5152	17.6336	14.7431	25.2322	44.9093	19.3356	MSMEG_RS14025	biphenyl-2,3-diol 1,2-dioxygenase
MSMEG_4297	116.691	0.99447	0.173729	5.72425	1.0389e-08	2.37911e-08	79.1137	73.2471	82.452	148.239	160.925	156.172	MSMEG_RS20800	wax ester/triacylglycerol synthase family O-acyltransferase
MSMEG_4039	111.259	0.994038	0.181676	5.47149	4.46256e-08	9.86525e-08	70.6213	78.6728	71.5312	170.317	136.599	139.811	MSMEG_RS19565	NAD(P)-dependent alcohol dehydrogenase
MSMEG_2812	23.6531	0.993161	0.368247	2.697	0.00699681	0.010552	16.5379	16.7293	14.197	28.3862	39.2956	26.7723	MSMEG_RS13625	sterol desaturase family protein
MSMEG_3988	54.555	0.992508	0.243596	4.07441	4.6131e-05	8.44006e-05	37.0985	37.98	35.4926	63.0805	74.8488	78.8297	MSMEG_RS19320	Lrp/AsnC family transcriptional regulator
MSMEG_3847	133.851	0.992351	0.17903	5.54293	2.97452e-08	6.63403e-08	94.7577	75.0556	98.8331	176.625	192.736	165.096	MSMEG_RS18650	primary-amine oxidase
MSMEG_0327	186.292	0.991727	0.174132	5.69525	1.23195e-08	2.80737e-08	97.4395	132.93	142.516	268.092	243.259	233.514	MSMEG_RS01610	aldehyde dehydrogenase family protein
MSMEG_2848	7.9199	0.991638	0.636064	1.55902	0.118991	0.149914	5.81061	4.06928	5.46039	15.7701	7.48488	8.92411	MSMEG_RS13810	MFS transporter
MSMEG_1576	253.766	0.991491	0.130237	7.613	2.67814e-14	7.98168e-14	160.462	179.953	167.088	362.713	316.236	336.142	MSMEG_RS07705	alpha/beta hydrolase
MSMEG_6556	213.198	0.99057	0.147872	6.69883	2.10091e-11	5.53382e-11	154.652	146.946	127.773	274.4	260.1	315.319	MSMEG_RS31615	TetR/AcrR family transcriptional regulator
MSMEG_4525	249.281	0.988947	0.127624	7.74888	9.2705e-15	2.8053e-14	166.273	161.415	174.733	324.865	321.85	346.553	MSMEG_RS21850	coproporphyrinogen III oxidase
MSMEG_0524	42.3707	0.987765	0.279392	3.53541	0.000407136	0.000688722	29.5	25.32	29.4861	66.2345	48.6517	55.032	MSMEG_RS02545	SDR family NAD(P)-dependent oxidoreductase
MSMEG_6180	347.62	0.987563	0.113196	8.72438	2.67636e-18	9.29654e-18	236.894	227.428	232.067	495.182	443.479	450.668	MSMEG_RS29820	serine protease
MSMEG_6167	8.03303	0.987119	0.620908	1.5898	0.11188	0.141668	5.81061	6.32999	4.36832	6.30805	14.9698	10.4115	MSMEG_RS29760	type II secretion system F family protein
MSMEG_3366	122.372	0.98702	0.171953	5.74004	9.46541e-09	2.17374e-08	85.3713	85.4549	76.9916	145.085	170.281	171.045	MSMEG_RS16370	DJ-1/PfpI family protein
MSMEG_0389	332.232	0.98686	0.124209	7.94512	1.94e-15	6.02463e-15	238.235	216.576	218.416	381.637	464.063	474.465	MSMEG_RS01925	glycosyltransferase
MSMEG_5067	154.279	0.986594	0.160741	6.1378	8.36706e-10	2.0411e-09	98.3334	110.323	104.294	186.088	194.607	232.027	MSMEG_RS24440	lytic murein transglycosylase
MSMEG_6672	13.7301	0.983397	0.498211	1.97386	0.048398	0.0652731	10.2803	10.3993	6.55247	18.9242	24.3259	11.8988	MSMEG_RS32165	alkaline phosphatase family protein
MSMEG_2098	40.1982	0.982748	0.2852	3.44582	0.00056933	0.000950003	29.0531	26.6764	24.5718	56.7725	58.0078	46.1079	MSMEG_RS10185	fumarylacetoacetate hydrolase family protein
MSMEG_1347	2784.19	0.982171	0.0787723	12.4685	1.1093e-35	6.24856e-35	1890.24	1740.75	1981.58	3778.52	3701.27	3612.78	MSMEG_RS06575	50S ribosomal protein L1
MSMEG_6809	5.43554	0.981266	0.761463	1.28866	0.197517	0.239078	4.91667	2.26071	3.82228	6.30805	9.3561	5.94941	MSMEG_RS32825	CbbQ/NirQ/NorQ/GpvN family protein
MSMEG_2176	317.693	0.981086	0.142722	6.87411	6.23797e-12	1.6882e-11	229.743	232.853	175.279	457.334	400.441	410.509	MSMEG_RS10550	hypothetical protein
MSMEG_2563	54.7864	0.980309	0.282386	3.47152	0.000517522	0.000867559	46.9319	36.1714	26.2099	85.1587	59.879	74.3676	MSMEG_RS12430	cytochrome P450
MSMEG_3286	163.853	0.980185	0.163147	6.008	1.87823e-09	4.4712e-09	103.25	127.052	99.3792	227.09	207.705	218.641	MSMEG_RS15965	class I SAM-dependent methyltransferase
MSMEG_2094	78.0379	0.978587	0.209829	4.66374	3.10514e-06	6.17989e-06	51.8485	55.6135	48.5975	116.699	97.3034	98.1652	MSMEG_RS10165	selenium-binding family protein
MSMEG_0214	406.936	0.978488	0.125251	7.81221	5.61916e-15	1.71233e-14	251.197	270.833	298.684	548.8	593.177	478.927	MSMEG_RS01050	gluconolaconase
MSMEG_4055	92.0973	0.975291	0.215339	4.52911	5.92337e-06	1.15659e-05	59.447	67.3692	62.7945	82.0047	151.569	129.4	MSMEG_RS19630	SDR family oxidoreductase
MSMEG_2768	1761.99	0.973283	0.0984341	9.88767	4.70865e-23	1.89922e-22	1327.05	1116.79	1118.29	2488.53	2325.93	2195.33	MSMEG_RS13410	OB-fold nucleic acid binding domain-containing protein
MSMEG_0723	10.2144	0.972714	0.561239	1.73316	0.0830679	0.107722	5.81061	5.42571	9.28267	15.7701	13.0985	11.8988	MSMEG_RS03530	hypothetical protein
MSMEG_2675	307.451	0.972231	0.141375	6.87697	6.11385e-12	1.65667e-11	239.129	194.873	185.107	454.18	381.729	389.686	MSMEG_RS12980	IS30-like element ISMsm8 family transposase
MSMEG_5251	126.141	0.97201	0.181499	5.35546	8.53392e-08	1.85844e-07	82.6895	89.072	79.7218	205.012	159.054	141.298	MSMEG_RS25320	FAD-dependent oxidoreductase
MSMEG_2965	6644.26	0.97161	0.0701742	13.8457	1.35087e-43	8.94986e-43	4235.04	4539.96	4686.11	8995.28	8742.34	8666.8	MSMEG_RS14400	RelA/SpoT family protein
MSMEG_2949	305.697	0.971545	0.126217	7.69743	1.38835e-14	4.17209e-14	225.273	193.969	202.035	375.329	435.994	401.585	MSMEG_RS14320	xanthine dehydrogenase family protein
MSMEG_1631	348.092	0.971496	0.139077	6.98531	2.8422e-12	7.81214e-12	196.22	258.625	253.362	425.793	469.676	484.877	MSMEG_RS07965	helix-turn-helix domain-containing protein
MSMEG_1106	208.35	0.971418	0.152809	6.35706	2.05657e-10	5.17603e-10	158.227	136.999	123.951	309.095	252.615	269.211	MSMEG_RS05385	GlxA family transcriptional regulator
MSMEG_4096	42.5417	0.970812	0.281197	3.45242	0.000555575	0.000928002	25.0303	33.4585	27.848	53.6184	61.7503	53.5447	MSMEG_RS19825	LLM class flavin-dependent oxidoreductase
MSMEG_5042	914.025	0.970295	0.0906688	10.7015	1.00107e-26	4.46399e-26	610.561	597.732	639.412	1312.07	1158.29	1166.08	MSMEG_RS24315	DEAD/DEAH box helicase
MSMEG_2626	1602.23	0.970028	0.0866953	11.1889	4.61949e-29	2.18577e-28	1103.12	1067.96	1080.07	2116.35	1947.94	2297.96	MSMEG_RS12745	YlxR family protein
MSMEG_4666	197.786	0.96951	0.162795	5.95542	2.59408e-09	6.13712e-09	143.477	110.323	149.615	242.86	256.357	284.084	MSMEG_RS22510	Gfo/Idh/MocA family oxidoreductase
MSMEG_3598	687.363	0.968941	0.159933	6.05841	1.3747e-09	3.30031e-09	560.501	494.644	338.544	917.821	860.761	951.905	MSMEG_RS17470	sugar ABC transporter xylitol/L-sorbitol-binding protein XypA
MSMEG_4143	42.3454	0.968598	0.375279	2.58101	0.00985125	0.0145631	31.7349	24.4157	27.302	94.6208	22.4546	53.5447	MSMEG_RS20045	DUF1330 domain-containing protein
MSMEG_4831	61.8898	0.967164	0.241385	4.00673	6.15661e-05	0.000111387	42.9091	42.9535	42.5911	56.7725	87.9473	98.1652	MSMEG_RS23285	TetR/AcrR family transcriptional regulator
MSMEG_1021	21.3826	0.963256	0.38924	2.47471	0.0133344	0.0194209	14.75	14.4686	13.1049	37.8483	24.3259	23.7976	MSMEG_RS04985	VOC family protein
MSMEG_6942	271.427	0.962995	0.124041	7.76354	8.25907e-15	2.50156e-14	194.432	176.788	181.831	346.943	368.63	359.939	MSMEG_RS33440	membrane protein insertase YidC
MSMEG_6414	1359.97	0.959603	0.077534	12.3766	3.50069e-35	1.95834e-34	949.812	916.492	901.511	1835.64	1813.21	1743.18	MSMEG_RS30940	septum formation family protein
MSMEG_4654	65.5144	0.959468	0.231734	4.14039	3.46714e-05	6.41376e-05	50.9546	43.4057	40.4069	72.5426	93.561	92.2158	MSMEG_RS22455	aldo/keto reductase
MSMEG_0673	96.4329	0.958586	0.216297	4.4318	9.34494e-06	1.79611e-05	65.7046	79.577	51.3277	126.161	116.016	139.811	MSMEG_RS03280	hypothetical protein
MSMEG_1268	816.41	0.956299	0.12072	7.9216	2.34469e-15	7.24337e-15	495.243	570.604	595.729	1223.76	924.383	1088.74	MSMEG_RS06195	NUDIX hydrolase
MSMEG_RS11890	12.7595	0.954908	0.505779	1.88799	0.0590267	0.0784851	10.7273	6.78213	9.28267	9.46208	22.4546	17.8482	MSMEG_RS11890	hypothetical protein
MSMEG_5266	488.538	0.954613	0.105485	9.04973	1.43325e-19	5.21809e-19	344.614	326.447	322.163	703.348	602.533	632.125	MSMEG_RS25395	RDD family protein
MSMEG_4501	20.0664	0.954406	0.395251	2.41468	0.015749	0.0227291	13.8561	15.3728	12.5589	18.9242	29.9395	29.747	MSMEG_RS21740	C4-dicarboxylate transporter DctA
MSMEG_4818	57.1128	0.954078	0.245973	3.87878	0.00010498	0.000186714	41.1213	36.1714	41.499	56.7725	82.3337	84.7791	MSMEG_RS23220	cytochrome P450
MSMEG_0297	3.22245	0.953883	0.987394	0.966062	0.334013	0.385368	1.78788	1.80857	3.27624	3.15403	1.87122	7.43676	MSMEG_RS01465	amidohydrolase family protein
MSMEG_3415	17.162	0.951861	0.455299	2.09063	0.0365613	0.0502021	10.2803	9.49499	14.197	34.6943	14.9698	19.3356	MSMEG_RS16610	MarR family transcriptional regulator
MSMEG_1185	131.904	0.950612	0.162176	5.8616	4.58438e-09	1.07134e-08	90.288	89.5242	90.0965	173.471	174.023	174.02	MSMEG_RS05775	Lrp/AsnC family transcriptional regulator
MSMEG_4653	869.63	0.950513	0.0894159	10.6302	2.15548e-26	9.52688e-26	578.379	581.455	615.386	1204.84	1156.41	1081.3	MSMEG_RS22450	TIM barrel protein
MSMEG_5629	92.7682	0.94977	0.233342	4.07029	4.69555e-05	8.57643e-05	58.1061	79.577	55.15	85.1587	132.857	145.76	MSMEG_RS27130	SMP-30/gluconolactonase/LRE family protein
MSMEG_5543	3491.42	0.949476	0.0987136	9.6185	6.68012e-22	2.6134e-21	2144.56	2276.99	2725.28	4686.88	4562.03	4552.78	MSMEG_RS26710	hypothetical protein
MSMEG_4144	106.926	0.949007	0.203168	4.67104	2.99679e-06	5.97705e-06	77.3258	83.6463	56.7881	145.085	147.826	130.887	MSMEG_RS20050	LysR family transcriptional regulator
MSMEG_1220	41.45	0.947206	0.30719	3.08345	0.00204614	0.00325323	27.7122	26.2243	32.2163	37.8483	78.5912	46.1079	MSMEG_RS05945	branched-chain amino acid ABC transporter permease
MSMEG_2770	938.491	0.946909	0.0950884	9.9582	2.32228e-23	9.43708e-23	650.342	603.158	664.53	1349.92	1150.8	1212.19	MSMEG_RS13415	DUF3159 domain-containing protein
MSMEG_1112	1731.83	0.945172	0.0972938	9.71462	2.6123e-22	1.03129e-21	1131.28	1114.98	1300.12	2497.99	2170.62	2176	MSMEG_RS05420	aconitate hydratase
MSMEG_6592	232.322	0.944712	0.166749	5.66548	1.46611e-08	3.32583e-08	138.561	147.851	192.752	290.17	275.069	349.528	MSMEG_RS31780	SDR family NAD(P)-dependent oxidoreductase
MSMEG_1100	21.3126	0.943447	0.393682	2.39647	0.0165539	0.0238432	15.644	14.4686	12.5589	37.8483	20.5834	26.7723	MSMEG_RS05355	hypothetical protein
MSMEG_0984	238.282	0.943276	0.130775	7.21295	5.47516e-13	1.54406e-12	163.591	170.458	155.075	305.94	331.206	303.42	MSMEG_RS04785	TRAP transporter fused permease subunit
MSMEG_1614	15.6522	0.94325	0.453602	2.07946	0.0375747	0.0514547	10.7273	10.3993	10.9208	18.9242	28.0683	14.8735	MSMEG_RS07885	amino acid ABC transporter ATP-binding protein
MSMEG_0875	352.842	0.943193	0.114637	8.22762	1.90976e-16	6.17233e-16	234.659	234.21	255	466.796	484.646	441.744	MSMEG_RS04270	MFS transporter
MSMEG_0981	87.4619	0.942941	0.220147	4.28323	1.84198e-05	3.46356e-05	46.0379	64.2042	68.801	123.007	114.144	108.577	MSMEG_RS04775	response regulator transcription factor
MSMEG_4822	7.82892	0.942599	0.631609	1.49238	0.1356	0.169331	6.25758	4.52142	4.91435	12.6161	11.2273	7.43676	MSMEG_RS23240	ferredoxin
MSMEG_0992	91.078	0.942435	0.21399	4.40411	1.0622e-05	2.03376e-05	58.5531	70.0821	60.6104	104.083	102.917	150.223	MSMEG_RS04830	nitronate monooxygenase
MSMEG_5455	33.0176	0.942071	0.322849	2.918	0.00352289	0.00546623	23.6894	23.0593	20.2035	53.6184	29.9395	47.5953	MSMEG_RS26285	PE-PPE domain-containing protein
MSMEG_2620	381.816	0.941929	0.108772	8.65965	4.73195e-18	1.62803e-17	259.243	254.104	271.382	504.644	488.388	513.136	MSMEG_RS12715	4a-hydroxytetrahydrobiopterin dehydratase
MSMEG_4786	6.53669	0.941887	0.681813	1.38144	0.167142	0.204481	5.36364	3.61714	4.36832	9.46208	7.48488	8.92411	MSMEG_RS23065	MCE family protein
MSMEG_2198	762.437	0.941607	0.0923079	10.2007	1.96813e-24	8.22921e-24	524.296	537.597	507.271	943.054	1070.34	992.064	MSMEG_RS10665	Rv1355c family protein
MSMEG_6323	4.4419	0.941379	0.918488	1.02492	0.3054	0.355063	4.02273	0.904285	4.36832	3.15403	11.2273	2.9747	MSMEG_RS30505	hypothetical protein
MSMEG_1453	56.1442	0.941098	0.247017	3.80985	0.000139053	0.00024517	39.7803	37.98	39.8609	53.6184	82.3337	83.2917	MSMEG_RS07100	membrane protein
MSMEG_2976	1068.02	0.940159	0.100306	9.37289	7.05743e-21	2.66641e-20	713.364	728.853	744.252	1605.4	1334.18	1282.1	MSMEG_RS14455	histidine--tRNA ligase
MSMEG_1861	42.0949	0.940072	0.283845	3.31192	0.00092657	0.00151922	28.1591	31.65	27.302	53.6184	44.9093	66.9308	MSMEG_RS09050	hypothetical protein
MSMEG_0044	624.894	0.93905	0.101849	9.22002	2.97049e-20	1.09932e-19	430.879	425.918	430.279	772.736	913.155	776.398	MSMEG_RS00210	hypothetical protein
MSMEG_2994	10.609	0.938817	0.548862	1.71048	0.0871769	0.112668	7.15152	5.87785	8.19059	18.9242	13.0985	10.4115	MSMEG_RS14540	amidohydrolase
MSMEG_0275	3.07548	0.938793	1.01901	0.921284	0.356902	0.409453	1.78788	1.80857	2.7302	3.15403	7.48488	1.48735	MSMEG_RS01355	BMC domain-containing protein
MSMEG_6295	30.0337	0.938711	0.35082	2.67577	0.00745585	0.0111898	16.9849	28.0328	17.4733	31.5403	43.0381	43.1332	MSMEG_RS30370	MHS family MFS transporter
MSMEG_1666	1152.13	0.938474	0.0810131	11.5842	4.95441e-31	2.47949e-30	798.736	789.893	781.382	1495.01	1588.67	1459.09	MSMEG_RS08135	sigma-70 family RNA polymerase sigma factor
MSMEG_0052	435.081	0.937799	0.148623	6.3099	2.79216e-10	6.98683e-10	290.531	295.701	316.703	441.564	559.495	706.492	MSMEG_RS00250	helix-turn-helix domain-containing protein
MSMEG_1715	137.747	0.936613	0.16985	5.51435	3.50062e-08	7.76775e-08	102.356	98.1149	82.452	179.779	192.736	171.045	MSMEG_RS08370	L-arabinose isomerase
MSMEG_2040	45.9756	0.935833	0.28687	3.26222	0.00110543	0.00179978	28.6061	38.8842	28.9401	41.0023	72.9776	65.4435	MSMEG_RS09900	DUF4345 family protein
MSMEG_5409	152.613	0.935616	0.163228	5.73197	9.92722e-09	2.27497e-08	94.7577	107.61	114.668	179.779	200.221	218.641	MSMEG_RS26060	hypothetical protein
MSMEG_2233	8.92833	0.935	0.622539	1.50191	0.133119	0.166457	5.36364	9.04285	4.36832	9.46208	7.48488	17.8482	MSMEG_RS10825	acyl-CoA dehydrogenase family protein
MSMEG_2857	16.3711	0.933749	0.521719	1.78975	0.0734936	0.0963622	6.70455	9.49499	18.5653	15.7701	14.9698	32.7217	MSMEG_RS13855	MCE family protein
MSMEG_1137	72.6844	0.933644	0.242668	3.84741	0.000119372	0.000211445	47.8258	57.8742	44.2292	100.929	69.2351	116.013	MSMEG_RS05540	APC family permease
MSMEG_6595	139.387	0.931821	0.17471	5.33352	9.63268e-08	2.09249e-07	86.7122	89.5242	109.754	201.858	183.38	165.096	MSMEG_RS31800	ABC transporter substrate-binding protein
MSMEG_4702	385.537	0.931316	0.12294	7.57536	3.58136e-14	1.05911e-13	298.129	257.269	241.895	476.258	522.07	517.599	MSMEG_RS22685	bifunctional copper resistance protein CopD/cytochrome c oxidase assembly protein
MSMEG_4991	782.328	0.931046	0.104195	8.93558	4.05062e-19	1.45197e-18	483.175	569.699	559.69	1088.14	958.065	1035.2	MSMEG_RS24070	hypothetical protein
MSMEG_5743	8.07226	0.929285	0.627256	1.48151	0.138471	0.172573	7.59849	4.06928	5.46039	6.30805	13.0985	11.8988	MSMEG_RS27685	patatin-like phospholipase family protein
MSMEG_3585	2.28621	0.928865	1.22638	0.757404	0.448808	0.501684	0.89394	1.35643	2.18416	6.30805	0	2.9747	MSMEG_RS17415	hypothetical protein
MSMEG_2846	3.80813	0.928453	0.937396	0.990459	0.32195	0.372573	3.57576	1.80857	2.18416	6.30805	7.48488	1.48735	MSMEG_RS13800	ABC transporter permease
MSMEG_5603	51.0917	0.926963	0.252235	3.675	0.000237853	0.000409818	32.1819	37.98	36.0386	63.0805	67.3639	69.9055	MSMEG_RS27000	winged helix-turn-helix transcriptional regulator
MSMEG_2211	484.234	0.926448	0.107551	8.61408	7.05083e-18	2.40549e-17	310.197	329.612	361.478	646.575	634.344	623.201	MSMEG_RS10730	helix-turn-helix domain-containing protein
MSMEG_6331	8.66764	0.924575	0.616625	1.49941	0.133767	0.167202	7.59849	3.61714	7.09851	9.46208	9.3561	14.8735	MSMEG_RS30545	ABC transporter permease
MSMEG_4414	2.34906	0.924526	1.34631	0.68671	0.492265	0.54421	0	2.26071	2.7302	3.15403	0	5.94941	MSMEG_RS21340	DUF421 domain-containing protein
MSMEG_4392	311.745	0.924023	0.12639	7.31086	2.6543e-13	7.55419e-13	233.765	218.385	192.752	413.177	392.956	419.433	MSMEG_RS21245	amidohydrolase family protein
MSMEG_5604	53.8339	0.923185	0.264019	3.49666	0.00047113	0.000792853	41.1213	39.3364	32.2163	63.0805	58.0078	89.2411	MSMEG_RS27005	cation transporter
MSMEG_6283	3340.22	0.922921	0.0848123	10.8819	1.40563e-27	6.39959e-27	2520.91	2239.46	2157.95	4472.41	4191.53	4459.08	MSMEG_RS30305	FAD-binding oxidoreductase
MSMEG_3497	100.931	0.922295	0.198603	4.64391	3.41874e-06	6.79156e-06	73.7501	68.7256	70.4391	94.6208	147.826	150.223	MSMEG_RS16995	helix-turn-helix domain-containing protein
MSMEG_6509	84.1119	0.921667	0.211501	4.35774	1.31411e-05	2.49404e-05	61.2349	52.4485	63.3406	85.1587	123.501	118.988	MSMEG_RS31400	ATP-binding cassette domain-containing protein
MSMEG_1218	15.3487	0.920377	0.462576	1.98968	0.0466266	0.0630278	12.9621	11.3036	8.19059	12.6161	26.1971	20.8229	MSMEG_RS05935	ABC transporter ATP-binding protein
MSMEG_6833	59.4988	0.920218	0.249675	3.68567	0.000228102	0.000394028	44.25	36.6235	42.045	88.3127	58.0078	87.7538	MSMEG_RS32940	alcohol dehydrogenase catalytic domain-containing protein
MSMEG_4701	30.8813	0.919776	0.396309	2.32085	0.0202947	0.0287977	16.9849	20.7985	23.4797	72.5426	26.1971	25.285	MSMEG_RS22680	single-stranded DNA-binding protein
MSMEG_2360	532.733	0.919488	0.107526	8.55135	1.21662e-17	4.10546e-17	344.167	366.235	390.964	753.812	694.223	646.998	MSMEG_RS11430	4-coumarate--CoA ligase family protein
MSMEG_2966	26.6813	0.918871	0.363112	2.53055	0.0113885	0.0167141	15.197	16.2771	24.0257	37.8483	28.0683	38.6712	MSMEG_RS14405	MFS transporter
MSMEG_0732	3364.57	0.918092	0.0866807	10.5917	3.25795e-26	1.43315e-25	2443.14	2376.46	2158.49	4708.96	4423.56	4076.83	MSMEG_RS03565	ATP-dependent chaperone ClpB
MSMEG_3128	182.954	0.917667	0.14704	6.24092	4.35008e-10	1.0798e-09	118.447	126.148	133.234	261.784	232.031	226.078	MSMEG_RS15190	hypothetical protein
MSMEG_0752	542.983	0.916619	0.102849	8.91231	4.99786e-19	1.77975e-18	359.364	362.618	405.161	734.888	692.351	703.518	MSMEG_RS03665	class II fructose-bisphosphate aldolase
MSMEG_4664	607.622	0.915988	0.100017	9.15831	5.27166e-20	1.93771e-19	438.031	408.737	420.45	725.426	851.405	801.683	MSMEG_RS22500	3D-(3,5/4)-trihydroxycyclohexane-1,2-dione acylhydrolase (decyclizing)
MSMEG_4745	2289.7	0.915702	0.0733551	12.4831	9.2278e-36	5.20695e-35	1539.37	1560.8	1656.68	3081.48	2941.56	2958.34	MSMEG_RS22900	L,D-transpeptidase family protein
MSMEG_6574	207.466	0.912858	0.144742	6.3068	2.84868e-10	7.12554e-10	148.394	132.478	149.069	283.862	290.039	240.951	MSMEG_RS31700	FABP family protein
MSMEG_0902	56.0569	0.912075	0.246705	3.69702	0.000218144	0.000377659	40.6743	41.5971	33.3084	82.0047	67.3639	71.3929	MSMEG_RS04400	class I SAM-dependent methyltransferase
MSMEG_6580	221.96	0.911248	0.150421	6.05799	1.3783e-09	3.30771e-09	141.243	157.346	168.726	239.706	297.524	327.217	MSMEG_RS31725	helix-turn-helix transcriptional regulator
MSMEG_1587	9.82887	0.910472	0.570667	1.59545	0.110611	0.140307	5.36364	7.23428	8.73663	6.30805	14.9698	16.3609	MSMEG_RS07760	alpha/beta hydrolase
MSMEG_1234	17.9257	0.909856	0.439304	2.07113	0.0383466	0.0524565	12.0682	9.94713	15.2891	22.0782	31.8107	16.3609	MSMEG_RS06030	ABC transporter ATP-binding protein
MSMEG_RS13640	4.45466	0.909784	0.860804	1.0569	0.290557	0.339322	4.02273	3.165	2.18416	3.15403	11.2273	2.9747	MSMEG_RS13640	hypothetical protein
MSMEG_6440	2030.44	0.909474	0.119616	7.60328	2.88714e-14	8.59666e-14	1543.39	1346.03	1333.43	3128.79	2559.83	2271.19	MSMEG_RS31070	NAD(P)/FAD-dependent oxidoreductase
MSMEG_0997	98.848	0.908742	0.217267	4.18261	2.8818e-05	5.36145e-05	73.7501	67.8213	67.1629	110.391	102.917	171.045	MSMEG_RS04855	class I SAM-dependent methyltransferase
MSMEG_2562	45.4315	0.90807	0.295081	3.07736	0.00208841	0.00331477	31.7349	34.815	25.6639	78.8506	59.879	41.6459	MSMEG_RS12425	hypothetical protein
MSMEG_0354	92.2225	0.907591	0.211411	4.29301	1.76267e-05	3.3202e-05	67.9395	62.8478	58.4262	154.547	93.561	116.013	MSMEG_RS01745	DUF732 domain-containing protein
MSMEG_0828	233.26	0.907412	0.13647	6.64917	2.9476e-11	7.71714e-11	160.462	166.841	163.266	271.246	295.653	342.091	MSMEG_RS04035	MPT63 family protein
MSMEG_2190	12.7334	0.906851	0.544899	1.66425	0.0960617	0.123076	12.0682	6.78213	6.55247	25.2322	16.841	8.92411	MSMEG_RS10625	acyl-CoA dehydrogenase family protein
MSMEG_0785	8.47666	0.905492	0.598555	1.5128	0.130331	0.163065	5.36364	5.42571	7.09851	9.46208	13.0985	10.4115	MSMEG_RS03830	hypothetical protein
MSMEG_2262	677.3	0.904402	0.132835	6.80846	9.86503e-12	2.63797e-11	548.879	480.627	383.32	920.975	842.049	887.949	MSMEG_RS10960	hydrogenase
MSMEG_1960	139.535	0.903322	0.17059	5.29528	1.18837e-07	2.56095e-07	108.167	96.7585	89.0044	154.547	198.349	190.381	MSMEG_RS09510	WXG100 family type VII secretion target
MSMEG_3561	798.727	0.901346	0.0871551	10.3419	4.55557e-25	1.93211e-24	540.387	563.821	564.059	1078.68	1031.04	1014.37	MSMEG_RS17300	glutamine synthetase
MSMEG_6775	68.7871	0.900318	0.224807	4.00485	6.20563e-05	0.000112243	43.8031	50.6399	50.2356	88.3127	78.5912	101.14	MSMEG_RS32660	MHS family MFS transporter
MSMEG_2049	430.155	0.899686	0.130096	6.91553	4.66111e-12	1.26937e-11	313.326	297.057	282.302	674.961	523.942	489.339	MSMEG_RS09945	TetR family transcriptional regulator
MSMEG_2907	37.6229	0.898641	0.297916	3.01642	0.00255777	0.00402244	22.3485	29.3893	26.2099	56.7725	44.9093	46.1079	MSMEG_RS14110	mannitol dehydrogenase family protein
MSMEG_0381	2223.74	0.898509	0.0815773	11.0142	3.2642e-28	1.5083e-27	1550.54	1619.57	1492.33	2810.24	2765.66	3104.1	MSMEG_RS01885	RND family transporter
MSMEG_6763	33.1908	0.897472	0.309681	2.89805	0.00375492	0.00581378	25.4773	21.7028	21.8416	47.3104	41.1668	41.6459	MSMEG_RS32600	alpha/beta hydrolase
MSMEG_4211	202.608	0.897334	0.14842	6.04591	1.4857e-09	3.5602e-09	153.311	145.59	126.135	261.784	243.259	285.572	MSMEG_RS20380	Spo0B domain-containing protein
MSMEG_5085	337.672	0.897122	0.120233	7.46153	8.55205e-14	2.48836e-13	243.599	231.497	234.797	428.947	402.312	484.877	MSMEG_RS24530	dihydropteroate synthase
MSMEG_1503	255.586	0.895746	0.136951	6.54063	6.12613e-11	1.58539e-10	188.174	191.708	157.805	309.095	338.691	348.04	MSMEG_RS07345	multidrug ABC transporter permease
MSMEG_0325	53.3049	0.894515	0.259723	3.4441	0.000572954	0.000955804	36.6516	33.4585	40.953	82.0047	52.3942	74.3676	MSMEG_RS01600	nuclear transport factor 2 family protein
MSMEG_2817	30.4052	0.892521	0.33714	2.64733	0.00811297	0.0121145	25.9243	21.7028	15.8351	41.0023	39.2956	38.6712	MSMEG_RS13655	ABC transporter ATP-binding protein
MSMEG_0998	117.874	0.89117	0.20873	4.26949	1.95916e-05	3.68072e-05	83.1365	81.3856	83.544	164.009	104.788	190.381	MSMEG_RS04860	molybdopterin-dependent oxidoreductase
MSMEG_5357	15.1011	0.890912	0.510356	1.74567	0.0808688	0.105079	12.9621	9.04285	8.19059	34.6943	9.3561	16.3609	MSMEG_RS25820	excalibur calcium-binding domain-containing protein
MSMEG_0523	154.961	0.890461	0.178557	4.98697	6.1333e-07	1.27161e-06	97.4395	96.7585	129.957	223.936	200.221	181.457	MSMEG_RS02540	helix-turn-helix transcriptional regulator
MSMEG_3804	556.425	0.889625	0.103113	8.62765	6.2624e-18	2.14212e-17	389.311	399.694	375.129	794.814	707.321	672.283	MSMEG_RS18440	hypothetical protein
MSMEG_1810	22.2501	0.888973	0.394645	2.25259	0.024285	0.0340734	16.5379	13.5643	16.3812	28.3862	39.2956	19.3356	MSMEG_RS08790	hypothetical protein
MSMEG_0142	75.0212	0.888744	0.224298	3.96234	7.42177e-05	0.000133608	62.1289	51.0921	45.8673	85.1587	97.3034	108.577	MSMEG_RS00700	hypothetical protein
MSMEG_6299	24.2872	0.887888	0.38115	2.3295	0.0198325	0.0282157	19.2197	14.9207	18.5653	15.7701	43.0381	34.2091	MSMEG_RS30390	D-glycerate dehydrogenase
MSMEG_0307	64.3084	0.886663	0.24372	3.63804	0.000274723	0.000471347	44.697	53.3528	36.5846	85.1587	91.6898	74.3676	MSMEG_RS01515	AraC family transcriptional regulator
MSMEG_4165	236.785	0.885685	0.132385	6.69022	2.22841e-11	5.86016e-11	164.485	161.867	169.272	337.481	305.009	282.597	MSMEG_RS20150	benzaldehyde dehydrogenase
MSMEG_4638	5.37645	0.885646	0.778187	1.13809	0.255084	0.301576	3.57576	3.61714	4.91435	0	11.2273	8.92411	MSMEG_RS22380	2Fe-2S iron-sulfur cluster binding domain-containing protein
MSMEG_5024	55.0861	0.885151	0.253659	3.48953	0.000483876	0.000813672	33.9697	36.6235	44.7752	82.0047	61.7503	71.3929	MSMEG_RS24225	DNA-deoxyinosine glycosylase
MSMEG_0205	3.26937	0.884586	0.979265	0.903317	0.366358	0.418676	1.78788	3.165	1.63812	6.30805	3.74244	2.9747	MSMEG_RS01005	antibiotic biosynthesis monooxygenase
MSMEG_5618	10.3272	0.884037	0.565381	1.56361	0.117909	0.148752	8.49243	5.42571	7.09851	18.9242	13.0985	8.92411	MSMEG_RS27075	acyl-CoA/acyl-ACP dehydrogenase
MSMEG_4886	15.5869	0.884007	0.464475	1.90324	0.0570093	0.0760825	8.9394	13.1121	12.0129	9.46208	26.1971	23.7976	MSMEG_RS23545	MHS family MFS transporter
MSMEG_0168	42.5535	0.883197	0.33011	2.67546	0.00746268	0.0111975	24.5834	28.485	36.0386	56.7725	76.72	32.7217	MSMEG_RS00830	formyl-CoA transferase
MSMEG_6297	75.4588	0.882993	0.219884	4.01572	5.92643e-05	0.000107372	46.0379	59.2306	52.4198	110.391	95.4322	89.2411	MSMEG_RS30380	aldehyde dehydrogenase
MSMEG_4164	128.023	0.882978	0.171695	5.14272	2.70786e-07	5.73667e-07	90.288	87.2635	89.5505	195.55	147.826	157.659	MSMEG_RS20145	enoyl-CoA hydratase/isomerase family protein
MSMEG_5412	1454.27	0.882222	0.0760898	11.5945	4.39525e-31	2.20644e-30	1030.27	1043.09	995.976	1857.72	1942.33	1856.22	MSMEG_RS26075	MPT63 family protein
MSMEG_2969	33.2191	0.881618	0.367475	2.39913	0.0164343	0.0236814	22.7955	32.1021	15.2891	44.1564	29.9395	55.032	MSMEG_RS14420	NADH:flavin oxidoreductase
MSMEG_2440	389.952	0.880738	0.138059	6.37945	1.77724e-10	4.48864e-10	311.985	259.53	253.908	488.874	445.35	580.067	MSMEG_RS11830	50S ribosomal protein L19
MSMEG_0132	545.593	0.879376	0.10426	8.43444	3.32803e-17	1.1047e-16	362.94	410.545	378.405	728.58	664.283	728.802	MSMEG_RS00650	ABC transporter permease
MSMEG_1146	82.7517	0.879041	0.218123	4.03003	5.57706e-05	0.000101127	57.2122	60.5871	56.7881	100.929	134.728	86.2664	MSMEG_RS05585	MCE family protein
MSMEG_5784	603.739	0.878947	0.0986643	8.90847	5.17431e-19	1.83957e-18	425.963	412.354	442.838	725.426	785.912	829.942	MSMEG_RS27880	response regulator transcription factor
MSMEG_1316	180.996	0.87881	0.150823	5.82675	5.65189e-09	1.31419e-08	135.879	114.392	130.503	252.322	228.289	224.59	MSMEG_RS06430	peptide chain release factor 3
MSMEG_4380	77.441	0.87849	0.217056	4.0473	5.18109e-05	9.42621e-05	52.2955	62.3956	49.1435	100.929	89.8186	110.064	MSMEG_RS21190	ABC transporter ATP-binding protein/permease
MSMEG_5374	34.1532	0.878169	0.30404	2.88834	0.00387283	0.00598353	24.5834	24.8678	22.9337	44.1564	39.2956	49.0826	MSMEG_RS25900	glutamine synthetase
MSMEG_0980	31.9793	0.877972	0.342641	2.56236	0.0103962	0.0153165	17.8788	20.3464	30.5782	34.6943	39.2956	49.0826	MSMEG_RS04770	GAF domain-containing protein
MSMEG_2216	7.49621	0.877371	0.663868	1.32161	0.186299	0.226216	6.70455	6.32999	3.27624	6.30805	7.48488	14.8735	MSMEG_RS10755	acyl--CoA ligase
MSMEG_3509	87.7561	0.876827	0.206125	4.25385	2.10123e-05	3.94192e-05	66.5986	53.3528	67.1629	104.083	110.402	124.938	MSMEG_RS17045	MBL fold metallo-hydrolase
MSMEG_2550	53.9718	0.876689	0.252332	3.47435	0.000512088	0.000859114	37.9925	41.145	35.4926	69.3886	58.0078	81.8044	MSMEG_RS12370	glyoxylate reductase
MSMEG_5057	182.475	0.875956	0.147626	5.93362	2.96329e-09	6.9928e-09	117.106	132.478	135.964	246.014	228.289	235.002	MSMEG_RS24390	suppressor of fused domain protein
MSMEG_0005	3553.41	0.875778	0.0745898	11.7413	7.832e-32	3.99334e-31	2606.28	2528.83	2379.09	4819.35	4446.02	4540.89	MSMEG_RS00025	DNA topoisomerase (ATP-hydrolyzing) subunit B
MSMEG_6378	23.98	0.874903	0.365278	2.39517	0.0166125	0.023917	18.7727	18.5378	13.651	28.3862	31.8107	32.7217	MSMEG_RS30760	SMP-30/gluconolactonase/LRE family protein
MSMEG_2120	165.199	0.873923	0.155168	5.63209	1.78038e-08	4.02332e-08	109.061	114.844	127.773	205.012	203.963	230.54	MSMEG_RS10290	AAA family ATPase
MSMEG_4159	85.2543	0.872723	0.205624	4.24426	2.19319e-05	4.10734e-05	55.8713	58.7785	67.7089	100.929	104.788	123.45	MSMEG_RS20125	IS256 family transposase
MSMEG_0250	1430.12	0.872359	0.0856778	10.1819	2.38956e-24	9.97849e-24	963.668	978.436	1092.08	1804.1	1893.67	1848.78	MSMEG_RS01230	MMPL family transporter
MSMEG_5751	14.8376	0.871754	0.452772	1.92537	0.0541829	0.0725039	11.6212	10.3993	9.82871	15.7701	20.5834	20.8229	MSMEG_RS27720	adhesin
MSMEG_0975	1559.21	0.87134	0.0831814	10.4752	1.12324e-25	4.83958e-25	1077.65	1105.49	1123.75	2053.27	1863.74	2131.38	MSMEG_RS04750	MinD/ParA family protein
MSMEG_2065	267.871	0.870891	0.126042	6.90953	4.86255e-12	1.32312e-11	187.28	187.639	189.476	384.791	329.335	328.705	MSMEG_RS10025	YceI family protein
MSMEG_2219	19.7417	0.870462	0.401586	2.16756	0.0301922	0.0418739	12.5152	12.66	16.3812	28.3862	26.1971	22.3103	MSMEG_RS10770	enoyl-CoA hydratase/isomerase family protein
MSMEG_4205	199.347	0.86886	0.143901	6.03791	1.56128e-09	3.73581e-09	134.091	133.834	156.167	252.322	263.842	255.825	MSMEG_RS20350	helix-turn-helix domain-containing protein
MSMEG_5705	373.116	0.868573	0.121852	7.12812	1.01748e-12	2.84232e-12	284.72	252.295	255	466.796	535.169	444.718	MSMEG_RS27495	helicase-associated domain-containing protein
MSMEG_3076	579.361	0.865708	0.100663	8.60004	7.96853e-18	2.71147e-17	422.387	397.885	405.707	816.893	729.776	703.518	MSMEG_RS14940	gamma-glutamyltransferase
MSMEG_5803	359.714	0.865461	0.121566	7.11926	1.0851e-12	3.02731e-12	258.796	260.886	243.534	463.642	516.457	414.971	MSMEG_RS27970	hypothetical protein
MSMEG_3541	452.224	0.864284	0.117349	7.3651	1.77014e-13	5.0868e-13	315.114	289.371	358.202	580.341	600.662	569.656	MSMEG_RS17205	cytochrome c biogenesis protein CcdA
MSMEG_5263	2893.85	0.863617	0.0739287	11.6817	1.5801e-31	8.01884e-31	1944.32	2118.74	2094.06	3743.83	3836	3626.16	MSMEG_RS25375	transcription elongation factor GreA
MSMEG_5495	66.7558	0.862114	0.24197	3.56289	0.000366789	0.0006229	41.1213	49.2835	54.6039	63.0805	89.8186	102.627	MSMEG_RS26475	enoyl-CoA hydratase family protein
MSMEG_6936	414.211	0.860054	0.106168	8.10089	5.45576e-16	1.72894e-15	283.826	302.483	296.499	529.876	552.01	520.573	MSMEG_RS33415	hypothetical protein
MSMEG_RS19275	60.7041	0.86001	0.257177	3.34404	0.000825666	0.00135891	44.697	49.7357	37.6767	50.4644	87.9473	93.7032	MSMEG_RS19275	alpha/beta fold hydrolase
MSMEG_3658	63.4576	0.858008	0.248466	3.45323	0.000553923	0.000925481	39.3334	46.5707	46.4134	110.391	71.1064	66.9308	MSMEG_RS17755	VOC family protein
MSMEG_4436	19.7553	0.857952	0.406564	2.11025	0.0348368	0.047978	12.5152	14.0164	16.9272	15.7701	28.0683	31.2344	MSMEG_RS21445	transketolase
MSMEG_3386	29.8842	0.857219	0.324855	2.63877	0.00832071	0.0124076	22.7955	20.3464	21.2955	34.6943	35.5532	44.6206	MSMEG_RS16460	MHS family MFS transporter
MSMEG_5940	245.061	0.857108	0.133483	6.42109	1.35298e-10	3.44384e-10	183.258	173.623	166.542	318.557	286.297	342.091	MSMEG_RS28630	fumarylacetoacetate hydrolase family protein
MSMEG_6623	18.5001	0.856974	0.438757	1.95319	0.0507976	0.068283	15.197	14.4686	11.4668	9.46208	26.1971	34.2091	MSMEG_RS31935	SDR family NAD(P)-dependent oxidoreductase
MSMEG_4599	66.4406	0.856476	0.266682	3.2116	0.00131998	0.00213467	56.3182	51.0921	32.7624	94.6208	95.4322	68.4182	MSMEG_RS22205	hypothetical protein
MSMEG_4015	7.49405	0.85448	0.644011	1.32681	0.184572	0.224411	5.36364	5.42571	5.46039	6.30805	14.9698	7.43676	MSMEG_RS19460	hypothetical protein
MSMEG_0215	483.76	0.8539	0.117369	7.27537	3.45478e-13	9.79808e-13	350.872	327.803	347.827	728.58	576.336	571.143	MSMEG_RS01055	pirin family protein
MSMEG_6444	43.9772	0.853074	0.319477	2.67023	0.00758003	0.0113631	33.9697	23.0593	34.4005	85.1587	41.1668	46.1079	MSMEG_RS31090	hypothetical protein
MSMEG_3577	67.7404	0.852703	0.236209	3.60995	0.000306254	0.000523375	47.8258	48.3792	45.8673	107.237	91.6898	65.4435	MSMEG_RS17375	DUF1810 domain-containing protein
MSMEG_6510	53.9104	0.852623	0.251766	3.38657	0.000707729	0.00117222	35.7576	39.3364	38.2228	85.1587	65.4927	59.4941	MSMEG_RS31405	ABC transporter permease
MSMEG_4851	29.8758	0.852087	0.337138	2.52741	0.0114907	0.0168603	17.8788	24.8678	20.2035	47.3104	31.8107	37.1838	MSMEG_RS23375	CoA transferase
MSMEG_1368	15172	0.851811	0.0659971	12.9068	4.12117e-38	2.45759e-37	11282.4	10554.4	10624.3	19021.9	19346.5	20202.7	MSMEG_RS06680	DNA-directed RNA polymerase subunit beta'
MSMEG_4913	538.73	0.850515	0.104059	8.17336	2.99909e-16	9.62133e-16	361.152	392.46	404.069	643.421	705.45	725.828	MSMEG_RS23680	zinc metallopeptidase LpqM
MSMEG_2893	7.91997	0.850185	0.638249	1.33206	0.182841	0.22239	4.02273	7.68642	4.91435	12.6161	9.3561	8.92411	MSMEG_RS14035	ferredoxin--NADP reductase
MSMEG_4018	126.286	0.848688	0.175341	4.84021	1.29701e-06	2.64692e-06	100.121	88.1678	81.9059	167.163	147.826	172.533	MSMEG_RS19470	nucleotidyltransferase domain-containing protein
MSMEG_0767	160.122	0.848419	0.151465	5.60141	2.12618e-08	4.78152e-08	116.212	117.557	108.116	214.474	202.092	202.28	MSMEG_RS03740	hypothetical protein
MSMEG_4422	63.7268	0.847994	0.262529	3.2301	0.00123746	0.00200922	52.2955	42.5014	44.7752	56.7725	72.9776	113.039	MSMEG_RS21380	NAD(P)/FAD-dependent oxidoreductase
MSMEG_4067	89.6601	0.845931	0.21483	3.93768	8.22719e-05	0.000147495	67.0455	72.7949	54.6039	88.3127	134.728	120.476	MSMEG_RS19690	zinc-dependent alcohol dehydrogenase family protein
MSMEG_2096	27.9895	0.845121	0.34128	2.47633	0.0132742	0.019342	21.4546	19.4421	19.6574	34.6943	28.0683	44.6206	MSMEG_RS10175	sulfite exporter TauE/SafE family protein
MSMEG_5577	333.79	0.84439	0.124799	6.76601	1.32382e-11	3.5183e-11	263.265	222.454	232.067	403.715	460.32	420.921	MSMEG_RS26880	carbohydrate kinase
MSMEG_5267	1636.62	0.844255	0.0878733	9.60764	7.42283e-22	2.89699e-21	1131.28	1173.76	1205.11	2128.97	2260.43	1920.17	MSMEG_RS25390	glutaryl-CoA dehydrogenase
MSMEG_3961	465.13	0.843934	0.105932	7.96675	1.62904e-15	5.07836e-15	324.053	330.064	340.183	640.267	604.404	551.808	MSMEG_RS19200	TetR/AcrR family transcriptional regulator
MSMEG_0913	1526.77	0.843541	0.097867	8.61927	6.73839e-18	2.30252e-17	1146.48	1078.81	1059.32	1823.03	1841.28	2211.69	MSMEG_RS04450	class I SAM-dependent methyltransferase
MSMEG_4718	107.186	0.843102	0.214386	3.93263	8.40198e-05	0.000150588	88.5001	69.1778	70.9851	141.931	168.41	104.115	MSMEG_RS22765	TetR family transcriptional regulator BkaR
MSMEG_3180	98.2706	0.842527	0.211672	3.98034	6.88157e-05	0.000124262	65.7046	85.0028	62.2485	100.929	147.826	127.912	MSMEG_RS15440	MerR family transcriptional regulator
MSMEG_5652	17.9592	0.842439	0.434793	1.93756	0.0526767	0.0706337	12.0682	14.9207	13.1049	9.46208	29.9395	28.2597	MSMEG_RS27240	alpha/beta fold hydrolase
MSMEG_3470	48.1543	0.842057	0.307816	2.73559	0.00622694	0.00944126	34.8637	36.6235	28.3941	94.6208	54.2654	40.1585	MSMEG_RS16860	SDR family oxidoreductase
MSMEG_4202	22.814	0.841855	0.398333	2.11345	0.0345626	0.0476509	18.3258	13.1121	18.0193	22.0782	43.0381	22.3103	MSMEG_RS20335	alpha/beta hydrolase
MSMEG_3473	216.36	0.841051	0.143704	5.85267	4.83738e-09	1.12803e-08	167.614	149.659	144.7	299.632	288.168	248.388	MSMEG_RS16875	uracil phosphoribosyltransferase
MSMEG_4149	197.619	0.840951	0.165149	5.09208	3.5416e-07	7.44239e-07	140.796	139.26	139.24	324.865	202.092	239.464	MSMEG_RS20075	acetaldehyde dehydrogenase (acetylating)
MSMEG_4196	665.778	0.840906	0.0926893	9.0723	1.16527e-19	4.25197e-19	466.637	468.872	492.528	895.743	843.92	826.968	MSMEG_RS20305	hypothetical protein
MSMEG_4620	620.692	0.840589	0.121225	6.93413	4.08723e-12	1.11635e-11	391.546	461.637	479.423	861.049	696.094	834.404	MSMEG_RS22290	hypothetical protein
MSMEG_2097	51.6953	0.839332	0.263306	3.18767	0.00143423	0.00231311	42.4622	33.4585	34.9465	72.5426	52.3942	74.3676	MSMEG_RS10180	acyl-CoA--6-aminopenicillanic acid acyl-transferase
MSMEG_3871	722.864	0.839189	0.0938638	8.9405	3.87405e-19	1.39021e-18	505.076	508.66	540.033	965.132	866.375	951.905	MSMEG_RS18765	precorrin-3B synthase
MSMEG_5666	227.103	0.839181	0.149235	5.62321	1.87436e-08	4.22982e-08	144.818	174.527	173.095	246.014	323.721	300.445	MSMEG_RS27305	DUF2630 family protein
MSMEG_3007	27.9221	0.837429	0.350625	2.38839	0.0169225	0.0243471	15.644	23.5114	20.2035	41.0023	37.4244	29.747	MSMEG_RS14605	NAD-dependent succinate-semialdehyde dehydrogenase
MSMEG_2906	34.9177	0.836067	0.318646	2.62382	0.00869509	0.0129274	31.7349	20.7985	22.3876	47.3104	41.1668	46.1079	MSMEG_RS14105	LLM class F420-dependent oxidoreductase
MSMEG_6218	290.519	0.83586	0.123939	6.74414	1.53931e-11	4.08098e-11	195.773	221.098	211.317	353.251	370.502	391.174	MSMEG_RS29990	DUF4350 domain-containing protein
MSMEG_5970	1254.44	0.834042	0.130048	6.41334	1.4237e-10	3.61961e-10	1086.14	846.863	767.731	1715.79	1631.7	1478.43	MSMEG_RS28780	glutamate-1-semialdehyde 2,1-aminomutase
MSMEG_2955	131.141	0.834007	0.176636	4.7216	2.33993e-06	4.70154e-06	88.9471	98.567	92.8267	182.933	185.251	138.324	MSMEG_RS14350	nuclear transport factor 2 family protein
MSMEG_1773	1528.24	0.831197	0.109132	7.61642	2.60798e-14	7.77614e-14	979.759	1085.14	1229.13	2173.12	1835.67	1866.63	MSMEG_RS08620	iron-containing redox enzyme family protein
MSMEG_6008	418.34	0.829044	0.116158	7.13718	9.52626e-13	2.66572e-12	329.864	301.579	271.928	533.03	542.654	530.985	MSMEG_RS28965	acetyl-CoA C-acetyltransferase
MSMEG_1908	10.7741	0.828078	0.558174	1.48355	0.137929	0.172008	10.7273	5.87785	6.55247	15.7701	9.3561	16.3609	MSMEG_RS09270	benzoate 1,2-dioxygenase large subunit
MSMEG_2958	3841.02	0.826121	0.0927084	8.91097	5.05896e-19	1.80053e-18	2465.04	2789.27	3055.09	5090.6	4788.45	4857.69	MSMEG_RS14365	hypothetical protein
MSMEG_2500	243.24	0.825227	0.1314	6.28024	3.38042e-10	8.41999e-10	171.19	183.57	173.641	299.632	293.782	337.629	MSMEG_RS12120	lipase
MSMEG_2878	26.1687	0.822128	0.352387	2.33303	0.0196466	0.0279817	17.4318	20.7985	18.0193	34.6943	39.2956	26.7723	MSMEG_RS13960	acyl-CoA/acyl-ACP dehydrogenase
MSMEG_1505	56.1191	0.820431	0.250031	3.28132	0.00103321	0.001686	36.6516	39.3364	47.5054	59.9265	72.9776	80.317	MSMEG_RS07355	EamA family transporter
MSMEG_3970	107.434	0.820241	0.183986	4.45817	8.2662e-06	1.59395e-05	80.0077	80.9335	71.5312	135.623	151.569	124.938	MSMEG_RS19230	amidase
MSMEG_1211	1672.31	0.819448	0.0927858	8.83161	1.03177e-18	3.62849e-18	1107.59	1193.66	1329.61	2141.58	2052.73	2208.72	MSMEG_RS05900	acyl-CoA desaturase
MSMEG_6342	122.22	0.817392	0.176105	4.6415	3.45885e-06	6.86495e-06	97.4395	88.1678	80.8138	141.931	170.281	154.685	MSMEG_RS30595	NAD(P)-dependent oxidoreductase
MSMEG_1912	92.2465	0.817145	0.217293	3.76057	0.00016953	0.000296415	56.3182	65.1085	76.4455	148.239	97.3034	110.064	MSMEG_RS09290	muconolactone Delta-isomerase
MSMEG_1005	472.829	0.817036	0.102182	7.99587	1.28661e-15	4.02824e-15	352.659	346.793	325.986	618.189	596.919	596.428	MSMEG_RS04900	class I SAM-dependent methyltransferase
MSMEG_1355	147.924	0.816959	0.177219	4.6099	4.02869e-06	7.95708e-06	92.9698	123.435	102.109	217.628	175.895	175.508	MSMEG_RS06615	TetR/AcrR family transcriptional regulator
MSMEG_3860	343.127	0.816259	0.114349	7.13832	9.44804e-13	2.6461e-12	242.258	248.678	255	428.947	465.934	417.946	MSMEG_RS18710	apolipoprotein N-acyltransferase
MSMEG_1339	516.982	0.816254	0.107951	7.56137	3.98835e-14	1.17679e-13	388.417	392.007	346.189	621.343	647.442	706.492	MSMEG_RS06535	50S ribosomal protein L33
MSMEG_4427	31.0267	0.816186	0.360508	2.26399	0.0235747	0.0331554	18.7727	29.3893	20.2035	34.6943	28.0683	55.032	MSMEG_RS21400	MFS transporter
MSMEG_2565	15.1658	0.815974	0.477262	1.7097	0.0873217	0.112833	9.38637	11.7557	11.4668	25.2322	9.3561	23.7976	MSMEG_RS12440	aldolase
MSMEG_3740	191.726	0.814963	0.150779	5.40503	6.47967e-08	1.41799e-07	145.712	146.494	122.313	258.63	252.615	224.59	MSMEG_RS18125	rRNA pseudouridine synthase
MSMEG_1606	184.6	0.813725	0.161429	5.04076	4.6368e-07	9.68134e-07	126.493	141.521	138.694	189.242	232.031	279.622	MSMEG_RS07845	benzoylformate decarboxylase
MSMEG_1023	235.599	0.812398	0.140347	5.7885	7.10168e-09	1.6425e-08	152.417	173.623	188.93	283.862	306.88	307.882	MSMEG_RS04990	OFA family MFS transporter
MSMEG_4091	39.3582	0.81207	0.287766	2.82198	0.00477276	0.00732003	28.1591	25.32	32.2163	50.4644	52.3942	47.5953	MSMEG_RS19800	NtaA/DmoA family FMN-dependent monooxygenase
MSMEG_4592	266.727	0.811173	0.132382	6.12752	8.92568e-10	2.17411e-09	174.765	196.682	209.133	353.251	319.979	346.553	MSMEG_RS22175	acyl-CoA dehydrogenase family protein
MSMEG_0259	94.281	0.810749	0.211244	3.83797	0.000124056	0.000219383	80.0077	66.9171	57.3341	132.469	101.046	127.912	MSMEG_RS01270	enoyl-CoA hydratase/isomerase family protein
MSMEG_4794	9.14145	0.810607	0.621944	1.30334	0.192457	0.233214	4.91667	8.13856	7.64455	3.15403	20.5834	10.4115	MSMEG_RS23105	MCE family protein
MSMEG_1003	232.419	0.809325	0.138872	5.82786	5.61434e-09	1.30593e-08	166.273	157.798	181.831	315.403	263.842	309.369	MSMEG_RS04890	ISL3-like element IS1096 family transposase
MSMEG_1399	1373.67	0.809058	0.0864939	9.35394	8.44451e-21	3.1794e-20	974.842	944.977	1074.06	1797.79	1687.84	1762.51	MSMEG_RS06835	30S ribosomal protein S7
MSMEG_2372	1809.48	0.808876	0.0837319	9.66031	4.44525e-22	1.74537e-21	1331.97	1297.2	1319.78	2267.74	2144.42	2495.78	MSMEG_RS11490	acetolactate synthase large subunit
MSMEG_4071	33.4168	0.808216	0.320179	2.52427	0.011594	0.017008	23.6894	24.4157	25.6639	31.5403	58.0078	37.1838	MSMEG_RS19705	GrpB family protein
MSMEG_3296	4.64685	0.808111	0.924303	0.874292	0.381959	0.434445	2.68182	6.78213	0.546039	6.30805	5.61366	5.94941	MSMEG_RS15995	sigma-70 family RNA polymerase sigma factor
MSMEG_1092	48.184	0.805845	0.27629	2.91667	0.00353793	0.00548827	37.0985	27.1285	41.499	59.9265	58.0078	65.4435	MSMEG_RS05315	urease accessory protein UreF
MSMEG_6643	344.707	0.804824	0.123098	6.53805	6.23253e-11	1.611e-10	256.114	239.183	256.639	435.256	488.388	392.661	MSMEG_RS32035	helix-turn-helix transcriptional regulator
MSMEG_5027	78.7036	0.804175	0.224879	3.57604	0.000348835	0.000593184	52.2955	55.1614	62.7945	123.007	74.8488	104.115	MSMEG_RS24240	VOC family protein
MSMEG_5287	986.635	0.803731	0.0919117	8.74461	2.23795e-18	7.79865e-18	689.228	699.464	771.554	1214.3	1220.04	1325.23	MSMEG_RS25485	alcohol dehydrogenase catalytic domain-containing protein
MSMEG_1770	819.498	0.80308	0.114905	6.98905	2.76745e-12	7.60991e-12	575.251	563.821	644.327	1211.15	989.875	932.57	MSMEG_RS08605	CsbD family protein
MSMEG_1537	37.1322	0.802082	0.302224	2.65393	0.00795598	0.0118965	28.1591	24.8678	30.0322	31.5403	56.1366	52.0573	MSMEG_RS07515	type VII secretion-associated protein
MSMEG_3312	142.394	0.801695	0.190706	4.20382	2.62443e-05	4.89663e-05	121.576	106.253	81.3599	195.55	188.993	160.634	MSMEG_RS16075	hemerythrin domain-containing protein
MSMEG_4277	461.61	0.799426	0.117792	6.78674	1.14696e-11	3.05699e-11	313.326	332.325	370.761	520.414	608.147	624.688	MSMEG_RS20695	adenosylcobinamide-GDP ribazoletransferase
MSMEG_1476	3819.18	0.799375	0.0821701	9.72829	2.28389e-22	9.02733e-22	2572.31	2831.77	2952.98	5118.98	4728.57	4710.44	MSMEG_RS07210	signal peptide peptidase SppA
MSMEG_3377	31.3401	0.799306	0.326	2.45186	0.014212	0.0206345	23.6894	22.6071	20.7495	50.4644	39.2956	31.2344	MSMEG_RS16420	hypothetical protein
MSMEG_0341	34.0555	0.798343	0.321848	2.48049	0.0131201	0.0191388	27.2652	27.5807	19.1114	44.1564	50.5229	35.6964	MSMEG_RS01680	LLM class F420-dependent oxidoreductase
MSMEG_5423	561.554	0.798255	0.094854	8.41562	3.90824e-17	1.29531e-16	417.917	410.997	400.247	722.272	705.45	712.442	MSMEG_RS26125	transcription-repair coupling factor
MSMEG_3959	773.275	0.797739	0.100963	7.90128	2.76052e-15	8.50376e-15	576.145	545.284	564.605	1103.91	954.322	895.386	MSMEG_RS19190	GntR family transcriptional regulator
MSMEG_1786	673.638	0.796849	0.104975	7.59081	3.17911e-14	9.4315e-14	526.084	465.707	478.877	927.284	864.504	779.372	MSMEG_RS08685	STAS domain-containing protein
MSMEG_2342	30.1117	0.796517	0.3899	2.04288	0.0410646	0.0559511	19.6667	30.7457	17.4733	15.7701	52.3942	44.6206	MSMEG_RS11330	glycosyltransferase family 1 protein
MSMEG_3006	38.6634	0.796099	0.289834	2.74674	0.00601914	0.00913684	25.4773	29.3893	28.9401	56.7725	46.7805	44.6206	MSMEG_RS14600	iron-containing alcohol dehydrogenase
MSMEG_5542	2072.36	0.796038	0.122966	6.47367	9.56535e-11	2.45589e-10	1313.2	1392.15	1838.51	2715.62	2574.8	2599.89	MSMEG_RS26705	helix-turn-helix transcriptional regulator
MSMEG_0284	105.447	0.795854	0.196356	4.05312	5.05396e-05	9.21297e-05	88.5001	74.6035	66.6168	148.239	117.887	136.836	MSMEG_RS01400	NAD(P)H-dependent oxidoreductase
MSMEG_1222	72.089	0.795092	0.225134	3.53164	0.000412994	0.000697907	51.8485	61.0392	45.8673	82.0047	101.046	90.7285	MSMEG_RS05960	IS1634-like element ISMsm6 family transposase
MSMEG_4288	284.78	0.794777	0.123795	6.4201	1.36181e-10	3.46497e-10	206.947	215.672	202.581	346.943	392.956	343.578	MSMEG_RS20760	RDD family protein
MSMEG_6546	73.7213	0.793956	0.218614	3.63178	0.000281477	0.000482426	51.8485	48.3792	61.7025	94.6208	93.561	92.2158	MSMEG_RS31570	helix-turn-helix transcriptional regulator
MSMEG_0213	155.415	0.793304	0.154181	5.14529	2.67113e-07	5.66071e-07	117.553	111.227	111.938	205.012	181.508	205.255	MSMEG_RS01045	helix-turn-helix transcriptional regulator
MSMEG_5494	138.743	0.791354	0.177353	4.46203	8.11881e-06	1.56785e-05	116.212	100.376	86.2742	192.396	164.667	172.533	MSMEG_RS26470	acyl-CoA/acyl-ACP dehydrogenase
MSMEG_4420	6.45286	0.791178	0.73031	1.08335	0.278655	0.326713	5.36364	4.06928	3.82228	15.7701	3.74244	5.94941	MSMEG_RS21370	cupin domain-containing protein
MSMEG_0517	17.4412	0.791164	0.423616	1.86765	0.0618115	0.0818534	11.6212	12.2078	14.7431	22.0782	18.7122	25.285	MSMEG_RS02515	carbohydrate ABC transporter permease
MSMEG_4294	2321.18	0.789747	0.074832	10.5536	4.88878e-26	2.1404e-25	1630.1	1712.26	1759.34	2977.4	3022.02	2825.97	MSMEG_RS20785	type I glutamate--ammonia ligase
MSMEG_3890	2830.79	0.789494	0.0702372	11.2404	2.58251e-29	1.2309e-28	2128.47	2013.84	2077.68	3702.83	3581.52	3480.4	MSMEG_RS18860	Pup--protein ligase
MSMEG_5624	3.91248	0.788766	0.955608	0.825408	0.40914	0.461889	1.78788	5.87785	1.09208	3.15403	5.61366	5.94941	MSMEG_RS27105	SDR family NAD(P)-dependent oxidoreductase
MSMEG_0490	64.7002	0.788286	0.265839	2.96527	0.00302417	0.00471716	47.3788	40.2407	51.3277	119.853	58.0078	71.3929	MSMEG_RS02390	enoyl-CoA hydratase/isomerase family protein
MSMEG_6305	210.112	0.78769	0.148345	5.30986	1.09707e-07	2.36971e-07	141.243	147.398	171.456	290.17	269.456	240.951	MSMEG_RS30420	hypothetical protein
MSMEG_4110	153.096	0.787278	0.159896	4.92369	8.4927e-07	1.75075e-06	117.553	115.748	104.294	192.396	175.895	212.691	MSMEG_RS19890	3-hydroxyacyl-CoA dehydrogenase family protein
MSMEG_6831	59.0238	0.78709	0.241531	3.25875	0.00111904	0.00182103	44.25	43.4057	40.953	88.3127	59.879	77.3423	MSMEG_RS32930	alpha/beta hydrolase
MSMEG_6223	196.903	0.785233	0.163104	4.81432	1.47704e-06	3.00432e-06	144.818	166.388	125.589	208.166	273.198	263.261	MSMEG_RS30015	TetR/AcrR family transcriptional regulator
MSMEG_3697	216.441	0.784229	0.135942	5.76885	7.98164e-09	1.83818e-08	148.841	162.319	167.088	264.938	278.812	276.647	MSMEG_RS17950	ISL3-like element IS1096 family transposase
MSMEG_1990	59.5437	0.783003	0.257259	3.04363	0.0023374	0.00369554	33.9697	43.4057	53.5119	82.0047	72.9776	71.3929	MSMEG_RS09660	DUF3445 domain-containing protein
MSMEG_5230	689.916	0.782737	0.153216	5.10872	3.24347e-07	6.82914e-07	610.114	523.581	384.958	920.975	898.186	801.683	MSMEG_RS25215	DUF1876 domain-containing protein
MSMEG_2888	1.74682	0.782681	1.33509	0.586237	0.557717	0.609014	1.34091	2.26071	0.546039	0	1.87122	4.46206	MSMEG_RS14015	alpha/beta hydrolase
MSMEG_1258	220.849	0.782378	0.142528	5.48929	4.03543e-08	8.94227e-08	156.887	174.527	158.351	261.784	258.228	315.319	MSMEG_RS06145	ISL3-like element IS1096 family transposase
MSMEG_2845	13.7619	0.781778	0.471809	1.65698	0.0975236	0.124752	9.83334	10.3993	9.82871	18.9242	18.7122	14.8735	MSMEG_RS13795	ABC transporter permease subunit
MSMEG_2108	62.9863	0.780581	0.234795	3.32452	0.000885725	0.00145518	50.0607	43.8578	43.1371	94.6208	74.8488	71.3929	MSMEG_RS10235	metal-dependent hydrolase
MSMEG_5491	103.796	0.780554	0.197527	3.95164	7.76188e-05	0.000139499	83.1365	75.9599	69.893	138.777	104.788	150.223	MSMEG_RS26455	acyl-CoA dehydrogenase family protein
MSMEG_2481	103.181	0.780545	0.190937	4.08797	4.35158e-05	7.97729e-05	75.538	68.2735	81.9059	148.239	129.114	116.013	MSMEG_RS12030	DUF3500 domain-containing protein
MSMEG_0840	186.104	0.780529	0.156407	4.99037	6.02647e-07	1.24986e-06	143.924	138.808	128.319	242.86	196.478	266.236	MSMEG_RS04095	hypothetical protein
MSMEG_6641	215.041	0.777422	0.139414	5.57635	2.4562e-08	5.49708e-08	146.159	166.841	164.358	258.63	265.713	288.546	MSMEG_RS32020	LLM class flavin-dependent oxidoreductase
MSMEG_3808	2753.3	0.77486	0.0727593	10.6496	1.75051e-26	7.76864e-26	1932.7	2079.4	2084.23	3434.73	3420.59	3568.16	MSMEG_RS18465	excinuclease ABC subunit UvrA
MSMEG_4659	364.89	0.774475	0.129039	6.00185	1.95083e-09	4.63724e-09	296.788	273.546	233.705	495.182	452.835	437.281	MSMEG_RS22480	GntR family transcriptional regulator
MSMEG_2905	34.2934	0.77335	0.331805	2.33073	0.0197674	0.0281354	29.0531	28.0328	17.4733	53.6184	37.4244	40.1585	MSMEG_RS14100	helix-turn-helix transcriptional regulator
MSMEG_1077	819.292	0.773286	0.115328	6.70511	2.0126e-11	5.30336e-11	548.432	575.577	686.918	1110.22	1051.63	942.981	MSMEG_RS05240	nitroreductase family deazaflavin-dependent oxidoreductase
MSMEG_3447	69.5431	0.773209	0.242101	3.19374	0.00140442	0.00226616	50.5076	55.1614	44.7752	119.853	71.1064	75.855	MSMEG_RS16750	response regulator transcription factor
MSMEG_4182	69.8765	0.772675	0.222484	3.47294	0.000514784	0.000863415	47.8258	49.7357	58.4262	82.0047	86.0761	95.1905	MSMEG_RS20235	sugar porter family MFS transporter
MSMEG_2376	438.978	0.772395	0.122282	6.31648	2.67587e-10	6.69842e-10	328.523	292.988	348.919	602.419	488.388	572.631	MSMEG_RS11510	hypothetical protein
MSMEG_1051	787.668	0.771982	0.0960984	8.03324	9.49282e-16	2.98647e-15	539.493	581.907	625.215	980.902	1019.81	978.678	MSMEG_RS05115	DUF3298 domain-containing protein
MSMEG_0871	32.8323	0.771889	0.314241	2.45636	0.0140353	0.0203916	25.0303	21.7028	26.7559	34.6943	48.6517	40.1585	MSMEG_RS04250	xanthine dehydrogenase family protein subunit M
MSMEG_1435	685.75	0.77025	0.111989	6.87793	6.0728e-12	1.64623e-11	522.508	450.786	542.763	955.67	808.367	834.404	MSMEG_RS07015	30S ribosomal protein S10
MSMEG_4140	202.955	0.769815	0.150608	5.11139	3.19803e-07	6.74001e-07	152.417	153.728	138.694	302.786	247.001	223.103	MSMEG_RS20030	PLP-dependent aminotransferase family protein
MSMEG_3886	1430.28	0.76957	0.0833843	9.22919	2.7269e-20	1.01089e-19	1031.61	1007.83	1132.49	1835.64	1790.76	1783.34	MSMEG_RS18840	twin-arginine translocase subunit TatC
MSMEG_0154	197.839	0.769106	0.162067	4.74559	2.07897e-06	4.19273e-06	146.606	166.841	127.227	217.628	286.297	242.438	MSMEG_RS00760	pyruvate kinase
MSMEG_4433	41.296	0.768909	0.299282	2.56918	0.010194	0.0150357	28.1591	24.8678	37.6767	63.0805	44.9093	49.0826	MSMEG_RS21430	NAD(P)/FAD-dependent oxidoreductase
MSMEG_0537	948.257	0.768833	0.116753	6.58513	4.54497e-11	1.18136e-10	743.758	675.501	693.47	1021.9	1158.29	1396.62	MSMEG_RS02610	DUF5313 domain-containing protein
MSMEG_3135	20.5474	0.768331	0.403866	1.90244	0.0571136	0.0762062	16.0909	13.1121	17.4733	15.7701	35.5532	25.285	MSMEG_RS15220	hypothetical protein
MSMEG_1868	79.9462	0.767407	0.232792	3.29654	0.000978849	0.0016005	67.4925	66.4649	43.6832	94.6208	104.788	102.627	MSMEG_RS09075	hypothetical protein
MSMEG_0743	674.737	0.765866	0.103057	7.43151	1.07367e-13	3.1101e-13	490.773	507.756	507.271	744.35	935.61	862.664	MSMEG_RS03620	XdhC family protein
MSMEG_0917	802.758	0.765082	0.0882996	8.66462	4.53035e-18	1.55949e-17	573.91	603.61	609.926	980.902	1001.1	1047.1	MSMEG_RS04470	DUF445 domain-containing protein
MSMEG_5478	55.8677	0.764614	0.263775	2.89874	0.0037467	0.00580244	46.4849	47.0228	30.5782	69.3886	67.3639	74.3676	MSMEG_RS26395	TIM barrel protein
MSMEG_6545	53.0966	0.764207	0.255182	2.99476	0.00274663	0.00430488	45.144	34.815	38.2228	63.0805	74.8488	62.4688	MSMEG_RS31565	histidine phosphatase family protein
MSMEG_3395	444.561	0.763895	0.114462	6.67376	2.49323e-11	6.54335e-11	364.281	320.569	305.236	536.184	566.98	574.118	MSMEG_RS16505	SDR family oxidoreductase
MSMEG_2009	441.196	0.762928	0.108899	7.0058	2.45574e-12	6.76708e-12	348.637	323.282	306.874	577.187	555.752	535.447	MSMEG_RS09740	GntR family transcriptional regulator
MSMEG_1186	57.6219	0.762159	0.236982	3.21611	0.00129942	0.002103	43.8031	41.145	44.2292	66.2345	72.9776	77.3423	MSMEG_RS05780	permease
MSMEG_3274	98.6016	0.760661	0.223118	3.40923	0.000651474	0.00108152	84.4774	75.0556	63.8866	85.1587	125.372	157.659	MSMEG_RS15910	MerR family transcriptional regulator
MSMEG_2972	77.9803	0.759413	0.206771	3.67273	0.000239974	0.000413254	59.894	56.9699	57.8802	88.3127	106.66	98.1652	MSMEG_RS14435	cytosine permease
MSMEG_4787	10.3725	0.759398	0.548799	1.38375	0.166437	0.203694	8.04546	8.13856	7.64455	6.30805	18.7122	13.3862	MSMEG_RS23070	MCE family protein
MSMEG_4992	1289.27	0.759242	0.110994	6.8404	7.89742e-12	2.12404e-11	827.789	957.637	1085.53	1690.56	1639.19	1534.95	MSMEG_RS24065	hypothetical protein
MSMEG_3387	29.7224	0.757538	0.323672	2.34045	0.0192605	0.027468	21.4546	23.5114	21.2955	37.8483	35.5532	38.6712	MSMEG_RS16465	aldehyde dehydrogenase family protein
MSMEG_3611	776.837	0.754352	0.0945353	7.97958	1.46828e-15	4.58161e-15	578.379	551.161	601.189	1021.9	1001.1	907.285	MSMEG_RS17525	phosphoketolase family protein
MSMEG_1229	48.1238	0.753381	0.316023	2.38394	0.0171282	0.024605	26.3712	51.5442	30.5782	50.4644	59.879	69.9055	MSMEG_RS06005	DNA topoisomerase (ATP-hydrolyzing) subunit B
MSMEG_4540	35.1946	0.751509	0.301004	2.49667	0.0125364	0.0183285	27.2652	24.4157	26.2099	50.4644	41.1668	41.6459	MSMEG_RS21920	GNAT family N-acetyltransferase
MSMEG_6441	433.099	0.751241	0.112284	6.69053	2.2236e-11	5.85225e-11	329.417	339.559	299.776	545.646	507.101	577.093	MSMEG_RS31075	TetR/AcrR family transcriptional regulator
MSMEG_0349	114.293	0.750802	0.184324	4.07327	4.63584e-05	8.47213e-05	92.5228	80.4813	79.7218	164.009	144.084	124.938	MSMEG_RS01720	MCE family protein
MSMEG_2187	46.9598	0.749818	0.355456	2.10946	0.0349053	0.0480521	44.25	43.4057	16.9272	63.0805	48.6517	65.4435	MSMEG_RS10610	5-oxoprolinase/urea amidolyase family protein
MSMEG_6615	382.446	0.748915	0.125704	5.95777	2.55709e-09	6.05401e-09	254.326	278.972	323.801	476.258	480.904	480.415	MSMEG_RS31895	dithiol-disulfide isomerase
MSMEG_3657	228.917	0.748725	0.144946	5.16555	2.39732e-07	5.09205e-07	181.917	170.91	155.621	315.403	301.266	248.388	MSMEG_RS17750	FAD-binding protein
MSMEG_2389	15649.6	0.747759	0.0815496	9.16939	4.75716e-20	1.75355e-19	12668.5	11274.2	11096.6	20860.7	19034.1	18963.7	MSMEG_RS11575	HU family DNA-binding protein
MSMEG_0802	207.857	0.747674	0.145681	5.13226	2.86283e-07	6.05119e-07	153.758	146.042	169.818	223.936	276.941	276.647	MSMEG_RS03910	ISL3-like element IS1096 family transposase
MSMEG_5520	417.704	0.745788	0.112032	6.6569	2.79654e-11	7.33345e-11	323.606	310.622	296.499	577.187	508.972	489.339	MSMEG_RS26600	LLM class F420-dependent oxidoreductase
MSMEG_4790	443.651	0.74512	0.120052	6.20663	5.41339e-10	1.33509e-09	303.94	354.932	333.084	605.573	490.26	574.118	MSMEG_RS23080	ISL3-like element IS1096 family transposase
MSMEG_2028	15.954	0.743012	0.443174	1.67657	0.0936262	0.120239	9.83334	12.66	13.1049	22.0782	18.7122	19.3356	MSMEG_RS09840	MFS transporter
MSMEG_1983	40.9167	0.742929	0.290579	2.55672	0.0105665	0.0155604	31.2879	33.9107	25.6639	59.9265	41.1668	53.5447	MSMEG_RS09625	MHS family MFS transporter
MSMEG_0874	182.88	0.740534	0.167133	4.43082	9.38767e-06	1.80379e-05	160.909	134.738	114.122	236.552	218.933	232.027	MSMEG_RS04265	FadR family transcriptional regulator
MSMEG_1084	19.8477	0.740406	0.456566	1.62169	0.104871	0.133468	9.38637	13.5643	22.9337	15.7701	26.1971	31.2344	MSMEG_RS05270	ABC transporter substrate-binding protein
MSMEG_0302	67.8597	0.738519	0.243527	3.0326	0.0024246	0.00382226	50.0607	53.3528	52.9658	50.4644	99.1747	101.14	MSMEG_RS01495	alpha/beta hydrolase
MSMEG_5701	228.656	0.738375	0.145719	5.06712	4.03876e-07	8.45164e-07	157.78	162.319	195.482	283.862	267.584	304.907	MSMEG_RS27475	molybdenum cofactor biosynthesis protein MoaE
MSMEG_2271	771.507	0.737684	0.119844	6.15535	7.49129e-10	1.83296e-09	615.478	622.148	496.35	999.826	864.504	1030.73	MSMEG_RS11000	hydrogenase nickel incorporation protein HypB
MSMEG_5648	40.8604	0.73752	0.283782	2.5989	0.00935227	0.0138601	26.8182	32.5542	33.3084	47.3104	48.6517	56.5194	MSMEG_RS27220	hypothetical protein
MSMEG_1897	27.9308	0.735389	0.392258	1.87476	0.0608264	0.0806473	17.8788	21.2507	24.5718	22.0782	58.0078	23.7976	MSMEG_RS09215	3-oxoadipate enol-lactonase
MSMEG_1929	402.294	0.735297	0.129771	5.66612	1.46067e-08	3.31465e-08	274.44	282.589	351.649	476.258	512.714	516.111	MSMEG_RS09370	hypothetical protein
MSMEG_2993	7.0525	0.735213	0.653976	1.12422	0.26092	0.308084	6.25758	4.52142	5.46039	6.30805	9.3561	10.4115	MSMEG_RS14535	acyl-CoA/acyl-ACP dehydrogenase
MSMEG_3822	207.626	0.735156	0.155178	4.7375	2.16376e-06	4.35698e-06	147.5	148.755	165.996	312.249	252.615	218.641	MSMEG_RS18530	FadR family transcriptional regulator
MSMEG_1575	685.689	0.7351	0.0899508	8.17225	3.02698e-16	9.70125e-16	513.569	519.512	510.001	857.895	883.216	829.942	MSMEG_RS07700	alanine racemase
MSMEG_1262	52.3739	0.733877	0.2712	2.70603	0.00680921	0.0102786	42.4622	41.145	31.6703	85.1587	61.7503	52.0573	MSMEG_RS06160	hypothetical protein
MSMEG_5809	37.8488	0.732788	0.315447	2.32302	0.0201783	0.0286513	22.3485	31.65	31.6703	41.0023	61.7503	38.6712	MSMEG_RS27990	metal ABC transporter substrate-binding protein
MSMEG_1706	118.532	0.732364	0.182514	4.01264	6.00423e-05	0.000108751	96.5456	93.1413	78.0836	145.085	134.728	163.609	MSMEG_RS08325	sugar ABC transporter permease
MSMEG_2283	217.022	0.731782	0.152014	4.8139	1.48013e-06	3.00929e-06	163.144	164.58	167.634	205.012	308.751	293.008	MSMEG_RS11060	ISL3-like element IS1096 family transposase
MSMEG_2914	683.911	0.731238	0.103542	7.06223	1.63855e-12	4.54407e-12	483.175	507.756	547.678	930.438	782.17	852.253	MSMEG_RS14140	L-idonate 5-dehydrogenase
MSMEG_1089	84.2557	0.730983	0.230731	3.16811	0.00153431	0.00246841	50.0607	72.7949	64.4327	132.469	93.561	92.2158	MSMEG_RS05300	hypothetical protein
MSMEG_2184	7.15381	0.730852	0.674378	1.08374	0.278479	0.326565	3.12879	6.78213	6.55247	6.30805	11.2273	8.92411	MSMEG_RS10595	amino acid permease
MSMEG_0809	8.41274	0.730373	0.628873	1.1614	0.245479	0.291068	6.25758	6.32999	7.09851	3.15403	18.7122	8.92411	MSMEG_RS03940	isoprenylcysteine carboxyl methyltransferase family protein
MSMEG_4150	155.229	0.730011	0.156231	4.67263	2.97361e-06	5.93263e-06	117.553	116.653	119.037	173.471	188.993	215.666	MSMEG_RS20080	4-hydroxy-2-oxovalerate aldolase
MSMEG_3844	77.4214	0.729948	0.221677	3.29284	0.000991795	0.00162126	66.1516	57.4221	53.5119	72.5426	112.273	102.627	MSMEG_RS18635	lipid-transfer protein
MSMEG_4428	22.3417	0.729787	0.376003	1.94091	0.0522695	0.07016	17.4318	18.99	14.197	25.2322	29.9395	28.2597	MSMEG_RS21410	hypothetical protein
MSMEG_0071	709.671	0.729424	0.128039	5.69687	1.22027e-08	2.78174e-08	583.743	560.204	458.127	898.897	770.943	986.114	-	-
MSMEG_0056	191.458	0.729406	0.142782	5.10854	3.24654e-07	6.83118e-07	147.5	143.329	141.97	239.706	218.933	257.312	MSMEG_RS00270	ESX-1 secretion-associated protein
MSMEG_5706	2024.36	0.729165	0.077833	9.36832	7.36986e-21	2.78123e-20	1492.88	1463.58	1613	2542.14	2580.41	2454.13	MSMEG_RS27500	DEAD/DEAH box helicase
MSMEG_0921	474.595	0.728406	0.108344	6.72306	1.77946e-11	4.71e-11	350.872	346.793	375.675	564.571	647.442	562.219	MSMEG_RS04490	DUF2599 domain-containing protein
MSMEG_2331	773.999	0.728223	0.106129	6.8617	6.80456e-12	1.83695e-11	531.448	573.769	647.603	905.205	980.519	1005.45	MSMEG_RS11285	DUF3298 domain-containing protein
MSMEG_4011	41.6498	0.728045	0.316211	2.3024	0.0213126	0.0301631	34.4167	30.7457	25.6639	78.8506	43.0381	37.1838	MSMEG_RS19440	pyrimidine permease RutG
MSMEG_0084	26.8489	0.727405	0.369987	1.96603	0.0492954	0.0663871	20.5606	24.4157	15.8351	34.6943	22.4546	43.1332	MSMEG_RS00415	HPr family phosphocarrier protein
MSMEG_2694	3882.18	0.726591	0.0628944	11.5526	7.16586e-31	3.56976e-30	2945.09	2938.02	2891.82	4819.35	4827.75	4871.08	MSMEG_RS13065	helix-turn-helix transcriptional regulator
MSMEG_5352	1359.61	0.726408	0.118142	6.1486	7.81714e-10	1.9091e-09	905.562	962.159	1202.92	1791.49	1723.39	1572.13	MSMEG_RS25795	N-acetyltransferase
MSMEG_2828	416.58	0.726114	0.115159	6.30531	2.87613e-10	7.18868e-10	318.243	297.057	331.992	466.796	520.199	565.194	MSMEG_RS13705	ISL3-like element IS1096 family transposase
MSMEG_6740	700.29	0.725819	0.120522	6.02231	1.71945e-09	4.10371e-09	469.319	497.809	617.025	883.127	842.049	892.411	MSMEG_RS32485	1-aminocyclopropane-1-carboxylate deaminase
MSMEG_4282	267.763	0.724844	0.122566	5.9139	3.34107e-09	7.87003e-09	205.159	198.943	200.396	340.635	338.691	322.755	MSMEG_RS20725	hypothetical protein
MSMEG_5856	14.0061	0.724619	0.517989	1.39891	0.161841	0.198705	9.83334	9.94713	10.9208	28.3862	5.61366	19.3356	MSMEG_RS28225	carboxymuconolactone decarboxylase family protein
MSMEG_2750	3605.99	0.724461	0.0692312	10.4644	1.25907e-25	5.41766e-25	2773.45	2782.03	2598.06	4592.26	4431.05	4459.08	MSMEG_RS13330	metal-dependent transcriptional regulator
MSMEG_3976	125.82	0.724404	0.169637	4.27032	1.9519e-05	3.66813e-05	96.9925	99.9235	88.4584	151.393	151.569	166.583	MSMEG_RS19255	TetR family transcriptional regulator
MSMEG_1937	2455.38	0.724215	0.0818463	8.84847	8.87239e-19	3.12527e-18	1932.25	1912.11	1714.56	2939.55	3053.83	3179.96	MSMEG_RS09405	adenylyltransferase/sulfurtransferase MoeZ
MSMEG_0135	363.214	0.723994	0.121851	5.94162	2.82223e-09	6.6696e-09	273.099	301.579	247.902	435.256	467.805	453.642	MSMEG_RS00665	MCE family protein
MSMEG_1348	21.7065	0.723943	0.382472	1.8928	0.0583845	0.0776996	19.2197	14.9207	14.7431	28.3862	26.1971	26.7723	MSMEG_RS06580	sigma-70 family RNA polymerase sigma factor
MSMEG_1751	106.259	0.722965	0.180301	4.00976	6.07805e-05	0.000110027	77.3258	83.1942	81.3599	123.007	132.857	139.811	MSMEG_RS08525	aldo/keto reductase
MSMEG_6837	52.5018	0.722956	0.266499	2.71279	0.00667198	0.0100878	38.4394	37.98	39.3148	91.4667	54.2654	53.5447	MSMEG_RS32965	haloalkane dehalogenase
MSMEG_5711	9.06328	0.722342	0.600299	1.2033	0.228859	0.273053	6.70455	4.52142	9.28267	12.6161	9.3561	11.8988	MSMEG_RS27530	SDR family oxidoreductase
MSMEG_0518	69.9552	0.722103	0.242328	2.97986	0.0028838	0.00450901	53.1894	57.4221	49.1435	66.2345	117.887	75.855	MSMEG_RS02520	sn-glycerol-3-phosphate ABC transporter ATP-binding protein UgpC
MSMEG_2483	177.991	0.721883	0.148357	4.86585	1.13968e-06	2.33242e-06	140.349	138.808	125.589	208.166	217.062	237.976	MSMEG_RS12040	IclR family transcriptional regulator
MSMEG_3181	1193.24	0.721217	0.106625	6.76406	1.34182e-11	3.56467e-11	863.099	878.965	970.858	1271.07	1551.24	1624.19	MSMEG_RS15445	SRPBCC family protein
MSMEG_0599	1195.45	0.721157	0.101612	7.09714	1.27369e-12	3.54889e-12	930.592	976.175	797.764	1529.7	1534.4	1404.06	MSMEG_RS02910	long-chain-fatty-acid--CoA ligase FadD2
MSMEG_5545	502.171	0.720827	0.107252	6.72087	1.80642e-11	4.77747e-11	353.553	381.156	402.977	621.343	660.541	593.453	MSMEG_RS26720	Fpg/Nei family DNA glycosylase
MSMEG_2427	613.642	0.719583	0.113093	6.36277	1.98153e-10	4.99489e-10	450.546	442.647	495.258	832.663	660.541	800.195	MSMEG_RS11765	[protein-PII] uridylyltransferase
MSMEG_2305	13.1444	0.718767	0.511184	1.40608	0.1597	0.196298	7.59849	11.7557	9.28267	25.2322	13.0985	11.8988	MSMEG_RS11170	helix-turn-helix transcriptional regulator
MSMEG_1602	7377.38	0.717158	0.0653065	10.9814	4.69522e-28	2.16339e-27	5354.26	5651.33	5732.87	9370.61	9116.58	9038.64	MSMEG_RS07825	IMP dehydrogenase
MSMEG_6526	298.867	0.717026	0.139549	5.13816	2.7744e-07	5.8681e-07	196.667	222.906	258.277	378.483	387.343	349.528	MSMEG_RS31475	TIGR03668 family PPOX class F420-dependent oxidoreductase
MSMEG_4975	246.414	0.716776	0.13108	5.46821	4.54598e-08	1.00428e-07	196.667	188.091	175.825	287.016	327.464	303.42	MSMEG_RS23985	pyridoxamine 5'-phosphate oxidase family protein
MSMEG_4764	36.5268	0.716411	0.462517	1.54894	0.121397	0.152679	18.7727	31.1978	30.0322	91.4667	14.9698	32.7217	MSMEG_RS22960	ABC transporter permease
MSMEG_0202	423.858	0.716113	0.117191	6.11066	9.92216e-10	2.40961e-09	329.864	319.665	318.341	476.258	499.616	599.403	MSMEG_RS00990	ISL3-like element IS1096 family transposase
MSMEG_0387	879.818	0.715535	0.0876936	8.15949	3.36453e-16	1.07513e-15	687.44	659.223	647.603	1148.07	1040.4	1096.18	MSMEG_RS01915	class I SAM-dependent methyltransferase
MSMEG_2959	653.478	0.71467	0.127455	5.60725	2.0557e-08	4.62941e-08	449.652	493.287	533.481	974.594	748.488	721.366	MSMEG_RS14370	4-aminobutyrate--2-oxoglutarate transaminase
MSMEG_3288	41.9493	0.713988	0.284108	2.51308	0.0119681	0.0175173	33.0758	29.3893	32.2163	53.6184	61.7503	41.6459	MSMEG_RS15975	LysM peptidoglycan-binding domain-containing protein
MSMEG_1595	11.0114	0.711863	0.531315	1.33981	0.180306	0.219553	7.59849	10.3993	7.09851	12.6161	14.9698	13.3862	MSMEG_RS07790	SDR family oxidoreductase
MSMEG_6866	62.0501	0.710238	0.284722	2.4945	0.0126135	0.0184371	47.3788	42.0492	49.6896	107.237	41.1668	84.7791	MSMEG_RS33100	ABC transporter permease
MSMEG_RS15450	623.467	0.709796	0.0933953	7.5999	2.96352e-14	8.82006e-14	485.41	477.914	456.489	760.12	793.397	767.474	MSMEG_RS15450	hypothetical protein
MSMEG_6462	420.831	0.709744	0.115176	6.16227	7.17107e-10	1.75593e-09	324.053	332.325	297.045	577.187	475.29	519.086	MSMEG_RS31165	ISL3-like element IS1096 family transposase
MSMEG_6697	424.892	0.70947	0.117045	6.06153	1.3483e-09	3.23811e-09	294.553	347.245	329.808	482.566	538.911	556.27	MSMEG_RS32285	ISL3-like element IS1096 family transposase
MSMEG_1299	212.953	0.708115	0.151322	4.67953	2.87532e-06	5.74535e-06	145.265	179.5	157.259	299.632	235.774	260.287	MSMEG_RS06350	isopenicillin N synthase family oxygenase
MSMEG_2339	222.725	0.708104	0.131426	5.38786	7.13032e-08	1.55671e-07	169.849	171.814	166.542	271.246	271.327	285.572	MSMEG_RS11320	ISL3-like element IS1096 family transposase
MSMEG_2227	52.9974	0.707773	0.290409	2.43716	0.0148031	0.0214306	44.697	28.485	45.3213	88.3127	56.1366	55.032	MSMEG_RS10795	crotonase/enoyl-CoA hydratase family protein
MSMEG_RS24705	15.262	0.706767	0.499619	1.41461	0.157183	0.193533	12.0682	10.8514	10.3747	28.3862	22.4546	7.43676	MSMEG_RS24705	hypothetical protein
MSMEG_2507	30.5317	0.706548	0.344296	2.05215	0.0401551	0.0547462	22.3485	17.6336	30.0322	37.8483	33.682	41.6459	MSMEG_RS12160	IclR family transcriptional regulator
MSMEG_0639	2446.36	0.706506	0.0851394	8.29822	1.05679e-16	3.45676e-16	1843.3	1865.99	1858.72	3343.27	2778.76	2988.09	MSMEG_RS03110	dipeptide ABC transporter ATP-binding protein
MSMEG_1059	247.115	0.705442	0.137197	5.14182	2.72087e-07	5.75862e-07	183.705	188.091	196.028	277.554	286.297	351.015	MSMEG_RS05150	ISL3-like element IS1096 family transposase
MSMEG_4005	94.5162	0.704192	0.208073	3.38435	0.000713481	0.00118055	82.2425	64.6564	66.6168	138.777	97.3034	117.501	MSMEG_RS19410	SMP-30/gluconolactonase/LRE family protein
MSMEG_2884	56.7546	0.7041	0.240922	2.92253	0.00347202	0.00539115	44.697	43.8578	41.499	63.0805	80.4625	66.9308	MSMEG_RS13990	NAD(P)/FAD-dependent oxidoreductase
MSMEG_1522	1413.34	0.703416	0.0955816	7.35933	1.84832e-13	5.30211e-13	1196.09	998.782	1029.28	1778.87	1781.4	1695.58	MSMEG_RS07440	30S ribosomal protein S11
MSMEG_3894	1955.34	0.703112	0.0827049	8.50145	1.87233e-17	6.26936e-17	1414.21	1531.41	1524	2340.29	2329.67	2592.45	MSMEG_RS18880	proteasome subunit alpha
MSMEG_3763	167.157	0.703109	0.16831	4.17747	2.94773e-05	5.48254e-05	125.152	146.494	109.754	211.32	187.122	223.103	MSMEG_RS18240	ABC transporter permease
MSMEG_4819	7.0192	0.702976	0.741998	0.94741	0.34343	0.395671	8.04546	4.52142	2.7302	12.6161	11.2273	2.9747	MSMEG_RS23225	ferredoxin
MSMEG_5255	382.69	0.70229	0.110064	6.38074	1.76239e-10	4.45286e-10	302.599	295.249	277.388	457.334	484.646	478.927	MSMEG_RS25335	hypothetical protein
MSMEG_5433	5.39779	0.700771	0.751934	0.931958	0.351358	0.403804	3.57576	5.42571	3.82228	3.15403	7.48488	8.92411	MSMEG_RS26175	4Fe-4S ferredoxin
MSMEG_4652	1389.22	0.700645	0.079585	8.80373	1.32348e-18	4.6343e-18	1028.48	1084.24	1058.22	1800.95	1641.06	1722.35	MSMEG_RS22445	Gfo/Idh/MocA family oxidoreductase
MSMEG_6155	414.272	0.700492	0.114656	6.10951	9.99392e-10	2.42523e-09	295.894	320.117	335.268	463.642	550.139	520.573	MSMEG_RS29700	ISL3-like element IS1096 family transposase
MSMEG_5493	100.943	0.699317	0.199314	3.50862	0.000450442	0.000758627	80.4546	74.6035	72.6232	145.085	134.728	98.1652	MSMEG_RS26465	acetyl/propionyl-CoA carboxylase subunit alpha
MSMEG_2831	86.7568	0.69794	0.20361	3.42783	0.00060843	0.00101317	71.0683	57.8742	69.893	107.237	102.917	111.551	MSMEG_RS13720	hypothetical protein
[truncated: 4,507 more rows]

## Sheet: ∆mftG vs WT on 10 gL-1 glucose
Gene	baseMean	log2FoldChange	lfcSE	stat	pvalue	padj	wt_gluc1	wt_gluc2	wt_gluc3	mftG_gluc1	mftG_gluc2	mftG_gluc3	locus_tag	annotation		Description	Gene expression in DmftG mutants compared to wild type of M. smegmatis MC2 155 grown on 10 g L-1 glucose as the sole carbon source.
MSMEG_1971	202.336	2.0174	0.693456	2.9092	0.00362355	0.406462	67.4072	121.515	50.9326	762.789	121.77	89.599	MSMEG_RS09565	methane monooxygenase
MSMEG_6242	5713.12	1.668	0.552903	3.01681	0.0025545	0.341387	4780.52	1762.98	1660.67	5593.24	16272.7	4208.59	MSMEG_RS30110	NDMA-dependent methanol dehydrogenase		Legend
MSMEG_0494	69.4683	1.63765	0.425668	3.84725	0.000119451	0.0527126	45.8369	25.3157	28.147	153.217	68.2943	95.9989	MSMEG_RS33475	hypothetical protein		baseMean	mean of all normalized read counts
MSMEG_6241	2684.16	1.56473	0.551895	2.83519	0.00457982	0.446214	2380.28	881.997	805.539	2754.61	7403.49	1879.02	MSMEG_RS30105	MoxR family ATPase		log2FoldChange	log2 of fold change (mftG/WT)
MSMEG_1749	623.207	1.5199	0.356406	4.26452	2.00335e-05	0.021723	489.106	284.548	190.327	851.754	1009.6	913.91	MSMEG_RS08520	LLM class F420-dependent oxidoreductase		lfcSE	Standard error of log2FoldChange
MSMEG_6469	516.038	1.49418	0.444065	3.36478	0.00076606	0.17165	128.343	410.114	273.428	899.531	460.664	924.149	MSMEG_RS31200	DUF427 domain-containing protein		stat	Value of the statistic of DEseq2
MSMEG_6240	617.076	1.45348	0.580681	2.50306	0.0123125	0.688681	564.602	189.361	235.898	542.025	1781.45	389.116	MSMEG_RS30100	VWA domain-containing protein		pvalue	p-value
MSMEG_1970	1698.46	1.42915	0.948451	1.50682	0.131857	0.999304	200.604	1360.97	1198.26	4843.63	1221.57	1365.74	MSMEG_RS09560	transcriptional regulator MimR		padj	Adjusted p-value (Benjamini-Hochberg)
MSMEG_RS33690	0.656684	1.41085	2.54437	0.554499	0.579237	0.999304	0	1.01263	0	1.64749	0	1.27999	MSMEG_RS33690	hypothetical protein		black	all genes with padj ≤ 0,05
MSMEG_RS33685	0.213331	1.37792	4.06574	0.338911	0.734677	0.999304	0	0	0	0	0	1.27999	MSMEG_RS33685	hypothetical protein		grey	all genes with padj > 0.05
MSMEG_0051	251.623	1.37035	0.356411	3.84488	0.000120614	0.0527126	116.48	157.97	148.777	235.591	536.046	314.876	MSMEG_RS00245	WhiB family transcriptional regulator
MSMEG_3269	1899.28	1.30626	0.415005	3.14757	0.00164633	0.289487	813.2	1100.72	1369.82	1637.61	4541.57	1932.78	MSMEG_RS15885	ABC transporter ATP-binding protein
MSMEG_5558	1909.72	1.2982	0.425763	3.04912	0.00229512	0.335658	647.109	921.49	1745.11	3352.65	1584.3	3207.64	MSMEG_RS26785	hypothetical protein
MSMEG_3605	649.177	1.29482	0.338325	3.82715	0.000129634	0.0527126	341.889	317.965	470.456	677.12	1341.4	746.231	MSMEG_RS17500	NAD(P)-dependent alcohol dehydrogenase
MSMEG_5403	515.755	1.29005	0.461097	2.79778	0.00514546	0.474114	376.941	322.015	197.029	1145.01	304.747	748.791	MSMEG_RS26040	cobalt-translocating P-type ATPase CtpD
MSMEG_6355	3088.28	1.28805	0.34086	3.77883	0.000157564	0.0603006	2081.53	1569.57	1733.05	2635.99	6271.48	4238.03	MSMEG_RS30660	hypothetical protein
MSMEG_3927	175.442	1.27018	0.550004	2.30941	0.0209211	0.767418	43.1406	142.78	124.651	120.267	441.336	180.478	MSMEG_RS19035	hydrogenase maturation protease
MSMEG_6239	364.664	1.2616	0.406009	3.10732	0.00188793	0.294651	252.912	185.311	206.411	403.636	847.88	291.837	MSMEG_RS30095	iron-containing alcohol dehydrogenase
MSMEG_3926	1534.37	1.25721	0.545717	2.30378	0.0212348	0.767418	341.889	1198.95	1176.81	1153.25	3890.2	1445.1	MSMEG_RS19030	cation-transporting ATPase Pma1
MSMEG_1212	1463.33	1.25375	0.507346	2.4712	0.013466	0.688681	1055.33	759.47	780.073	1003.32	4093.79	1087.99	MSMEG_RS05905	hypothetical protein
MSMEG_4688	3840.47	1.24564	0.206334	6.037	1.57004e-09	5.10734e-06	2216.89	2357.39	2259.8	5893.08	4554.46	5761.21	MSMEG_RS22615	DsbA family protein
MSMEG_3604	321.196	1.24385	0.368533	3.37515	0.000737745	0.17165	189.279	148.856	235.898	336.089	688.097	328.956	MSMEG_RS17495	glucose 1-dehydrogenase
MSMEG_6576	298.804	1.23211	0.30246	4.07363	4.62853e-05	0.0344462	159.081	215.689	159.499	509.075	295.083	454.395	MSMEG_RS31710	PPOX class F420-dependent oxidoreductase
MSMEG_0575	1400.36	1.17103	0.401966	2.91326	0.0035768	0.406462	1450.6	661.245	469.116	2001.7	1825.26	1994.22	MSMEG_RS02795	transport acessory protein MmpS
MSMEG_1748	319.166	1.16493	0.373905	3.11558	0.00183586	0.294651	301.984	135.692	151.457	372.333	566.972	386.556	MSMEG_RS08515	cupin domain-containing protein
MSMEG_3268	989.783	1.16328	0.420402	2.76706	0.00565646	0.496497	387.187	546.818	902.043	958.841	2137.74	1006.07	MSMEG_RS15880	carbohydrate ABC transporter permease
MSMEG_5559	1350.5	1.14705	0.2977	3.85302	0.000116669	0.0527126	624.46	1045.03	852.451	1565.12	1627.47	2388.45	MSMEG_RS26790	sugar porter family MFS transporter
MSMEG_3928	1063.29	1.14537	0.546998	2.09392	0.0362674	0.945461	197.907	970.096	820.283	873.171	2343.27	1175.03	MSMEG_RS19040	Ni/Fe hydrogenase subunit alpha
MSMEG_1514	2065.81	1.13092	0.295105	3.83227	0.000126968	0.0527126	1709.99	1169.58	1002.57	3194.49	2193.79	3124.44	MSMEG_RS07400	LLM class F420-dependent oxidoreductase
MSMEG_6238	156.04	1.12593	0.378029	2.97842	0.00289739	0.349081	115.94	103.288	75.0586	182.872	319.566	139.518	MSMEG_RS30090	two-component system sensor histidine kinase MnoS
MSMEG_0647	58.1045	1.11874	0.501927	2.22889	0.025821	0.83943	31.2769	51.6439	28.147	39.5398	135.3	62.7193	MSMEG_RS03150	phosphonate ABC transporter ATP-binding protein
MSMEG_3272	404.492	1.11807	0.476141	2.34819	0.0188649	0.748386	127.265	318.977	321.68	345.974	929.06	383.996	MSMEG_RS15900	D-erythrulose 4-phosphate isomerase DerI1
MSMEG_3270	1274.7	1.11301	0.428006	2.60046	0.00930986	0.612919	544.111	881.997	994.526	1054.4	2943.1	1230.07	MSMEG_RS15890	ABC transporter ATP-binding protein
MSMEG_3410	479.66	1.11072	0.224321	4.95148	7.36523e-07	0.00159727	348.9	275.434	284.15	680.415	594.032	695.032	MSMEG_RS16585	TetR/AcrR family transcriptional regulator
MSMEG_3416	931.756	1.10954	0.455918	2.43365	0.0149476	0.691775	661.669	713.901	395.398	560.148	2103.59	1155.83	MSMEG_RS16615	DMT family transporter
MSMEG_3271	2006.96	1.10402	0.451142	2.44716	0.0143987	0.688681	713.437	1348.82	1763.88	1734.81	4555.75	1925.1	MSMEG_RS15895	D-erythrulose 4-kinase
MSMEG_3266	4774.2	1.10366	0.411855	2.67974	0.00736801	0.58018	1724.55	2528.53	4846.64	4772.79	8895.01	5877.69	MSMEG_RS15870	extracellular solute-binding protein
MSMEG_2791	638.952	1.10116	0.35463	3.1051	0.00190214	0.294651	627.696	311.889	276.108	963.783	746.727	907.51	MSMEG_RS13525	PPOX class F420-dependent oxidoreductase
MSMEG_1098	4227.65	1.09961	0.313143	3.51153	0.000445538	0.120778	2027.07	3033.83	3011.73	4026.47	5629.13	7637.67	MSMEG_RS05345	fatty-acid--CoA ligase FadD8
MSMEG_3912	3.88097	1.09272	0.973147	1.12287	0.261491	0.999304	2.69629	3.03788	1.34033	6.58997	3.22143	6.39993	MSMEG_RS18970	SDR family oxidoreductase
MSMEG_4706	308.043	1.09001	0.308541	3.53278	0.000411222	0.117197	192.515	252.144	146.096	313.024	458.087	486.394	MSMEG_RS22705	tRNA-Arg
MSMEG_3267	1547	1.08834	0.391614	2.7791	0.00545093	0.485805	626.078	938.704	1407.35	1497.57	3106.1	1706.22	MSMEG_RS15875	sugar ABC transporter permease
MSMEG_5327	104.328	1.08773	0.279273	3.89486	9.82556e-05	0.0527126	76.0353	60.7576	61.6553	159.807	125.636	142.078	MSMEG_RS25665	hypothetical protein
MSMEG_1114	1847.82	1.07566	0.294004	3.65867	0.000253523	0.0868115	1611.84	960.982	991.846	2446.53	2104.88	2970.85	MSMEG_RS05425	SDR family oxidoreductase
MSMEG_0288	133.336	1.07194	0.400243	2.67821	0.00740162	0.58018	74.4175	121.515	62.9956	136.742	268.667	135.678	MSMEG_RS01420	TIGR03364 family FAD-dependent oxidoreductase
MSMEG_3930	1695.24	1.06906	0.555976	1.92286	0.0544979	0.999304	311.691	1650.58	1322.91	1375.66	3694.34	1816.3	MSMEG_RS19050	FAD/NAD(P)-binding protein
MSMEG_3929	1036.51	1.0626	0.568661	1.8686	0.0616779	0.999304	182.269	970.096	863.174	767.732	2256.93	1178.87	MSMEG_RS19045	oxidoreductase
MSMEG_3932	14946	1.05753	0.513495	2.05947	0.0394494	0.974076	2650.99	12036.1	14417.9	15921.4	25548.5	19101.2	MSMEG_RS19060	Hsp20/alpha crystallin family protein
MSMEG_4351	3435.1	1.04975	0.257349	4.07908	4.52144e-05	0.0344462	2625.1	2062.72	2022.56	4958.95	3543.57	5397.7	MSMEG_RS21060	SDR family oxidoreductase
MSMEG_4465	2304.8	1.03981	0.31562	3.29449	0.000985996	0.194391	1316.87	1589.82	1617.78	3797.47	1880.67	3626.2	MSMEG_RS21575	cutinase family protein
MSMEG_6766	487.811	1.03263	0.435236	2.37257	0.0176646	0.730318	186.044	488.086	288.171	362.448	704.849	897.27	MSMEG_RS32615	ABC transporter ATP-binding protein
MSMEG_1222	230.557	1.0326	0.230811	4.47379	7.68441e-06	0.00999896	165.013	157.97	130.012	296.549	318.922	314.876	MSMEG_RS05960	IS1634-like element ISMsm6 family transposase
MSMEG_0649	297.786	1.02991	0.424114	2.42837	0.0151668	0.694897	182.269	261.258	144.756	329.499	646.219	222.717	MSMEG_RS03155	phosphate/phosphite/phosphonate ABC transporter substrate-binding protein
MSMEG_3603	290.559	1.02126	0.416652	2.45111	0.0142416	0.688681	185.505	159.995	231.877	255.361	658.46	252.157	MSMEG_RS17490	alcohol dehydrogenase catalytic domain-containing protein
MSMEG_1558	3539.43	1.01117	0.381467	2.65073	0.00803175	0.612919	1727.24	3485.46	1830.89	2889.7	5721.26	5582.02	MSMEG_RS07615	hypothetical protein
MSMEG_2577	2.57962	1.00783	1.36488	0.738404	0.460269	0.999304	2.15703	3.03788	0	0	6.44286	3.83996	MSMEG_RS12500	hypothetical protein
MSMEG_1202	240.272	0.997586	0.512787	1.94542	0.0517245	0.999304	219.478	113.414	148.777	191.109	610.139	158.718	MSMEG_RS05860	hypothetical protein
MSMEG_1783	988.203	0.992383	0.418535	2.37108	0.017736	0.730318	319.24	818.202	847.09	1347.65	856.256	1740.78	MSMEG_RS08670	hypothetical protein
MSMEG_1802	15411.9	0.990213	0.409351	2.41898	0.0155639	0.698336	5091.67	12688.2	13184.8	18624.9	14436.5	28445.1	MSMEG_RS08750	ChaB family protein
MSMEG_6755	2869.84	0.986934	0.378106	2.6102	0.00904886	0.612919	3091.02	1554.38	1125.88	4179.69	3315.5	3952.59	MSMEG_RS32560	aromatic alcohol reductase
MSMEG_6703	1050.9	0.984198	0.442698	2.22318	0.0262036	0.83943	1227.89	512.389	373.953	1596.42	989.623	1605.1	MSMEG_RS32315	LLM class F420-dependent oxidoreductase
MSMEG_4800	18.6703	0.984114	0.731148	1.34598	0.178307	0.999304	10.7851	23.2904	4.021	11.5325	47.0329	15.3598	MSMEG_RS23130	SDR family oxidoreductase
MSMEG_6237	969.882	0.978417	0.587662	1.66493	0.0959266	0.999304	1246.76	368.596	343.125	874.819	2369.04	616.953	MSMEG_RS30080	class I SAM-dependent methyltransferase
MSMEG_5167	655.734	0.975223	0.389998	2.50058	0.0123989	0.688681	717.212	296.699	309.617	1000.03	670.057	940.789	MSMEG_RS24915	MFS transporter
MSMEG_1076	15209	0.973207	0.373129	2.60823	0.00910107	0.612919	5495.03	13125.7	12176.9	16758.3	17138.6	26559.7	MSMEG_RS05235	hypothetical protein
MSMEG_4640	604.097	0.965305	0.309999	3.1139	0.00184635	0.294651	373.166	409.101	447.671	673.825	1134.59	586.233	MSMEG_RS22395	transglycosylase family protein
MSMEG_6753	2001.42	0.964594	0.299651	3.21905	0.00128615	0.239076	1673.32	1285.02	1107.11	3141.77	1831.7	2969.57	MSMEG_RS32550	SDR family oxidoreductase
MSMEG_3940	12977.3	0.964467	0.417635	2.30935	0.0209241	0.767418	3983.49	12344.9	10056.5	13067.9	22654.4	15756.6	MSMEG_RS19095	universal stress protein
MSMEG_1969	179.796	0.961021	0.443561	2.16661	0.0302649	0.863613	85.2027	168.096	112.588	383.866	202.306	126.719	MSMEG_RS09555	MerR family transcriptional regulator
MSMEG_6027	79.9443	0.954468	0.444606	2.14677	0.0318114	0.895952	44.7584	91.1363	26.8066	126.857	100.509	89.599	MSMEG_RS29060	MHS family MFS transporter
MSMEG_3601	450.364	0.952869	0.360392	2.64398	0.0081937	0.612919	273.403	254.169	395.398	449.766	891.692	437.755	MSMEG_RS17480	ABC transporter permease
MSMEG_1755	804.388	0.95269	0.303922	3.13466	0.00172056	0.294578	490.185	587.323	565.62	1293.28	675.212	1214.71	MSMEG_RS08540	cupin domain-containing protein
MSMEG_3001	13.1757	0.950717	0.705381	1.34781	0.177721	0.999304	17.7955	4.0505	4.021	19.7699	20.6171	12.7999	MSMEG_RS14580	SRPBCC family protein
MSMEG_3265	4666.83	0.949748	0.43572	2.17972	0.029278	0.86178	1449.52	2750.29	5354.63	4906.23	7295.25	6245.05	MSMEG_RS15865	erythritol/L-threitol dehyrogenase
MSMEG_5875	306.822	0.946486	0.364665	2.5955	0.00944542	0.612919	139.128	239.992	250.642	380.571	271.244	559.354	MSMEG_RS28325	hypothetical protein
MSMEG_0772	10.6117	0.944295	0.651323	1.44981	0.147111	0.999304	11.8637	5.06313	4.021	13.1799	15.4629	14.0798	MSMEG_RS03765	esterase-like activity of phytase family protein
MSMEG_RS01375	870.131	0.941057	0.469142	2.00591	0.0448659	0.999304	225.949	1009.59	553.557	981.906	1040.52	1409.26	MSMEG_RS01375	hypothetical protein
MSMEG_3137	2863.99	0.937988	0.258723	3.62545	0.000288456	0.0893663	2169.43	2094.11	1627.16	3906.21	2912.17	4474.83	MSMEG_RS15230	oxidoreductase
MSMEG_6579	844.904	0.935282	0.353849	2.64317	0.00821349	0.612919	390.422	733.141	619.233	700.184	1235.1	1391.34	MSMEG_RS31720	hemophore-related protein
MSMEG_6204	20.259	0.932524	0.559661	1.66623	0.0956678	0.999304	14.5599	14.1768	12.063	34.5974	11.5971	34.5596	MSMEG_RS29930	tRNA-Pro
MSMEG_6667	1259.03	0.928796	0.483422	1.92129	0.0546948	0.999304	379.098	1219.2	1003.91	1611.25	856.256	2484.45	MSMEG_RS32140	DUF2243 domain-containing protein
MSMEG_5380	9.09159	0.926533	0.818393	1.13214	0.257577	0.999304	12.9422	1.01263	4.021	11.5325	12.2414	12.7999	MSMEG_RS25925	tRNA-Leu
MSMEG_1779	1304.18	0.923732	0.389377	2.37233	0.0176761	0.730318	570.534	1407.55	723.779	1281.75	1569.48	2271.97	MSMEG_RS08650	hypothetical protein
MSMEG_6747	2748.82	0.923568	0.285092	3.23954	0.00119723	0.229094	2156.49	1905.76	1628.5	4125.32	2466.97	4209.87	MSMEG_RS32520	NADP-dependent oxidoreductase
MSMEG_0493	661.395	0.921942	0.377088	2.4449	0.0144893	0.688681	620.146	283.535	465.095	1070.87	543.133	985.589	MSMEG_RS33470	hypothetical protein
MSMEG_3012	42.082	0.916589	0.431268	2.12534	0.0335586	0.915468	26.9629	16.202	45.5713	49.4248	61.8514	52.4794	MSMEG_RS14630	thiolase family protein
MSMEG_4857	10.7073	0.912186	0.617267	1.47778	0.139466	0.999304	8.62812	5.06313	8.04199	18.1224	10.3086	14.0798	MSMEG_RS23405	ferredoxin
MSMEG_6211	689.621	0.91035	0.385087	2.36401	0.0180782	0.735104	263.158	677.447	497.263	856.696	669.413	1173.75	MSMEG_RS33620	hypothetical protein
MSMEG_3949	1895.3	0.90574	0.476371	1.90133	0.0572581	0.999304	447.044	1873.36	1639.23	1967.11	3266.53	2178.54	MSMEG_RS19140	hypothetical protein
MSMEG_2862	13.485	0.90193	0.638603	1.41235	0.157847	0.999304	14.0207	6.07576	8.04199	14.8274	27.7043	10.2399	MSMEG_RS13880	hypothetical protein
MSMEG_0331	134.194	0.901004	0.391731	2.30006	0.0214451	0.767418	62.5539	149.869	68.3569	205.937	152.051	166.398	MSMEG_RS01630	GAF domain-containing protein
MSMEG_1370	145.513	0.898773	0.501936	1.79061	0.0733553	0.999304	57.1613	192.399	54.9536	252.066	147.541	168.958	MSMEG_RS06690	zinc-dependent alcohol dehydrogenase family protein
MSMEG_5540	4856.35	0.897113	0.393497	2.27985	0.0226168	0.793806	1813.52	4964.91	3403.1	4438.35	6527.26	7990.95	MSMEG_RS26700	hypothetical protein
MSMEG_2905	1333.42	0.896364	0.344172	2.60441	0.00920336	0.612919	1253.77	806.05	733.161	2095.61	1095.93	2015.98	MSMEG_RS14100	helix-turn-helix transcriptional regulator
MSMEG_1909	448.356	0.894061	0.303622	2.94465	0.0032332	0.382458	244.284	337.204	360.549	527.198	449.067	771.831	MSMEG_RS09275	LysR family transcriptional regulator
MSMEG_4141	3120.34	0.893621	0.364583	2.45107	0.0142431	0.688681	3316.97	1508.81	1722.33	4764.55	2911.53	4497.87	MSMEG_RS20035	LLM class F420-dependent oxidoreductase
MSMEG_3409	447.058	0.887642	0.237842	3.73206	0.000189917	0.0686444	332.722	257.207	351.167	545.32	544.422	651.513	MSMEG_RS16580	zinc-dependent alcohol dehydrogenase family protein
MSMEG_3599	1300.03	0.883423	0.381212	2.3174	0.0204818	0.767418	640.638	956.932	1147.32	1204.32	2615.8	1235.19	MSMEG_RS17475	sugar ABC transporter xylitol/D-threitol-binding protein ThpA
MSMEG_3582	1461.91	0.882808	0.225793	3.90981	9.23668e-05	0.0527126	914.041	995.411	1175.47	1986.88	1615.87	2083.82	MSMEG_RS17400	endopeptidase La
MSMEG_2850	802.012	0.880824	0.362097	2.43256	0.0149924	0.691775	900.021	401	390.037	1036.27	1099.15	985.589	MSMEG_RS13820	nitroreductase family deazaflavin-dependent oxidoreductase
MSMEG_0686	1882.8	0.879282	0.404587	2.17328	0.0297591	0.86178	710.741	1902.72	1365.8	2258.71	1683.52	3375.32	MSMEG_RS03345	2Fe-2S iron-sulfur cluster binding domain-containing protein
MSMEG_6758	12136.8	0.877748	0.453125	1.9371	0.0527331	0.999304	2970.77	12910	9784.42	15679.2	15482.8	15993.4	MSMEG_RS32575	aquaporin family protein
MSMEG_0279	553.409	0.875785	0.388662	2.25334	0.024238	0.81706	230.263	591.374	351.167	497.543	798.914	851.19	MSMEG_RS01370	APC family permease
MSMEG_4871	11.141	0.875522	0.846661	1.03409	0.301095	0.999304	15.6385	7.08838	0	16.4749	18.6843	8.9599	MSMEG_RS23475	SDR family NAD(P)-dependent oxidoreductase
MSMEG_2863	9.29212	0.873564	0.994781	0.878147	0.379864	0.999304	11.3244	8.10101	0	1.64749	18.04	16.6398	MSMEG_RS13885	hypothetical protein
MSMEG_2982	237.519	0.864177	0.623892	1.38514	0.16601	0.999304	189.819	110.376	206.411	123.562	683.587	111.359	MSMEG_RS14480	urea ABC transporter substrate-binding protein
MSMEG_5271	2139.06	0.862803	0.357083	2.41626	0.015681	0.69877	931.837	1724.5	1897.91	3290.04	1827.19	3162.84	MSMEG_RS25410	alpha/beta hydrolase
MSMEG_5460	32.6664	0.862102	0.528962	1.6298	0.103144	0.999304	36.6695	21.2651	10.7227	41.1873	59.2743	26.8797	MSMEG_RS26305	hypothetical protein
MSMEG_0817	448.101	0.859647	0.287415	2.99096	0.00278105	0.341387	224.331	373.659	359.209	515.665	539.912	675.832	MSMEG_RS03980	LysR family transcriptional regulator
MSMEG_0685	2706.91	0.855367	0.381707	2.2409	0.0250326	0.833142	1042.92	2561.94	2178.04	2878.17	2835.5	4744.91	MSMEG_RS03340	xanthine dehydrogenase family protein subunit M
MSMEG_5329	815.025	0.855153	0.385265	2.21965	0.0264426	0.83943	841.781	457.707	440.969	649.112	1459.95	1040.63	MSMEG_RS25675	TMEM165/GDT1 family protein
MSMEG_5029	2097.78	0.854071	0.255182	3.34691	0.000817183	0.17165	1790.87	1286.04	1403.33	2967.13	2139.03	3000.29	MSMEG_RS24255	LLM class flavin-dependent oxidoreductase
MSMEG_3583	1212.92	0.852994	0.369516	2.30841	0.0209764	0.767418	1359.47	582.26	648.721	1672.21	1231.87	1783.02	MSMEG_RS17405	LLM class flavin-dependent oxidoreductase
MSMEG_5499	49.2155	0.849417	0.446769	1.90124	0.0572703	0.999304	44.2191	38.4798	22.7856	36.2448	90.8443	62.7193	MSMEG_RS26495	hypothetical protein
MSMEG_5782	1087.83	0.849404	0.282081	3.01121	0.0026021	0.341387	559.21	932.629	840.388	1346	1657.1	1191.67	MSMEG_RS27870	phosphate ABC transporter substrate-binding protein PstS
MSMEG_6769	1075.91	0.848602	0.407863	2.08061	0.0374698	0.955995	480.478	1185.79	639.338	975.316	1179.04	1995.5	MSMEG_RS32630	cation:proton antiporter
MSMEG_0453	276.266	0.842702	0.338501	2.48951	0.0127918	0.688681	181.19	246.068	167.541	296.549	506.409	259.837	MSMEG_RS02210	gluconokinase
MSMEG_2981	22.5786	0.839043	0.526449	1.59378	0.110985	0.999304	19.9525	13.1641	16.084	18.1224	46.3886	21.7598	MSMEG_RS14475	urea ABC transporter permease subunit UrtB
MSMEG_4676	2.96105	0.838618	1.11676	0.75094	0.452689	0.999304	2.69629	1.01263	2.68066	4.94248	5.15429	1.27999	MSMEG_RS22560	tRNA-Gly
MSMEG_6454	5136.12	0.837623	0.353719	2.36805	0.0178822	0.731708	5804.57	2859.66	2389.81	6776.14	6406.13	6580.4	MSMEG_RS31135	LLM class F420-dependent oxidoreductase
MSMEG_1770	4046.27	0.833069	0.419257	1.98701	0.0469211	0.999304	1254.85	3329.51	4145.65	5164.89	4049.34	6333.37	MSMEG_RS08605	CsbD family protein
MSMEG_6768	6934.22	0.831637	0.390077	2.13198	0.0330084	0.911043	2535.59	6604.35	5829.1	7494.45	7252.08	11889.8	MSMEG_RS32625	tryptophan 7-halogenase
MSMEG_3680	10948.8	0.829234	0.430979	1.92407	0.0543458	0.999304	5981.98	6398.78	11277.6	18247.6	6317.87	17469.2	MSMEG_RS17865	hypothetical protein
MSMEG_4689	2342.08	0.827576	0.372633	2.22089	0.0263585	0.83943	1038.07	1324.51	2704.79	2606.33	3355.44	3023.33	MSMEG_RS22620	DUF732 domain-containing protein
MSMEG_4331	48.621	0.82652	0.348532	2.37143	0.0177194	0.730318	43.6798	32.404	28.147	60.9572	68.9386	57.5993	MSMEG_RS20970	LysR family transcriptional regulator
MSMEG_6542	4470.99	0.822796	0.341107	2.41214	0.0158593	0.698859	2220.66	4377.58	3090.81	5146.77	4301.25	7688.87	MSMEG_RS31550	cobalamin-dependent protein
MSMEG_5300	55.0813	0.821936	0.336081	2.44565	0.0144593	0.688681	46.3761	40.505	30.8276	74.1372	60.5629	78.0791	MSMEG_RS25540	SDR family oxidoreductase
MSMEG_3602	385.903	0.816962	0.369989	2.20807	0.0272394	0.839903	280.953	217.715	341.785	372.333	757.036	345.596	MSMEG_RS17485	sugar ABC transporter ATP-binding protein
MSMEG_RS02925	986.558	0.815901	0.314659	2.59297	0.00951503	0.612919	525.237	752.381	867.195	1459.68	864.632	1450.22	MSMEG_RS02925	hypothetical protein
MSMEG_5322	178.599	0.814407	0.409536	1.98861	0.0467443	0.999304	65.2501	206.576	117.949	217.469	245.473	218.877	MSMEG_RS25645	hypothetical protein
MSMEG_2177	709.823	0.812695	0.337926	2.40495	0.0161747	0.70626	632.01	408.088	502.624	1085.7	548.932	1081.59	MSMEG_RS10560	LLM class flavin-dependent oxidoreductase
MSMEG_4707	1433.02	0.809986	0.327139	2.47597	0.0132876	0.688681	768.981	1237.43	1117.84	1344.35	1582.37	2547.17	MSMEG_RS22710	alpha/beta hydrolase
MSMEG_3937	1746.83	0.809935	0.518773	1.56125	0.118464	0.999304	317.623	1670.83	1820.17	2006.65	2229.87	2435.81	MSMEG_RS19085	hypothetical protein
MSMEG_2107	1800.72	0.809026	0.269351	3.00361	0.00266794	0.341387	1186.91	1005.54	1735.73	2199.4	2445.71	2231.01	MSMEG_RS10225	DUF4185 domain-containing protein
MSMEG_0280	1401.75	0.808668	0.506838	1.59552	0.110597	0.999304	337.575	1780.2	939.573	1647.49	1356.87	2348.77	MSMEG_RS01380	alpha/beta hydrolase
MSMEG_2415	4937.82	0.805532	0.302846	2.65987	0.00781706	0.60545	2735.11	4695.55	3352.17	5276.92	5466.12	8101.03	MSMEG_RS11705	hemerythrin domain-containing protein
MSMEG_3543	3602.86	0.803387	0.456792	1.75876	0.0786189	0.999304	1027.82	3216.1	3632.3	3543.76	3769.07	6428.09	MSMEG_RS17210	protein disulfide oxidoreductase
MSMEG_4961	791.823	0.799758	0.418142	1.91265	0.0557932	0.999304	879.529	304.8	546.855	1204.32	639.132	1176.31	MSMEG_RS23915	hypothetical protein
MSMEG_0696	2388.85	0.79944	0.473391	1.68875	0.0912667	0.999304	641.177	2311.83	2278.56	2556.91	2218.28	4326.35	MSMEG_RS03395	DUF3618 domain-containing protein
MSMEG_1950	35620.6	0.798369	0.425949	1.87433	0.0608851	0.999304	11268.3	36460.6	30298.2	41978.1	34307.6	59410.5	MSMEG_RS09465	hypothetical protein
MSMEG_3914	1273.58	0.797967	0.277673	2.87376	0.00405616	0.43252	758.735	868.833	1163.41	1764.46	1245.4	1840.62	MSMEG_RS18975	EstA family serine hydrolase
MSMEG_1999	2721.64	0.796717	0.305291	2.6097	0.00906221	0.612919	1593.51	1716.4	2659.22	3112.11	4426.24	2822.37	MSMEG_RS33530	hypothetical protein
MSMEG_6305	1623.48	0.7949	0.484741	1.63984	0.101038	0.999304	414.689	1637.42	1510.55	2006.65	1358.15	2813.41	MSMEG_RS30420	hypothetical protein
MSMEG_5607	1943.24	0.787057	0.246184	3.19702	0.00138853	0.250938	1092.54	1439.95	1747.79	2494.3	2373.55	2511.33	MSMEG_RS27020	hypothetical protein
MSMEG_0303	669.387	0.783988	0.469309	1.67052	0.0948172	0.999304	859.037	389.861	223.835	1085.7	574.703	883.19	MSMEG_RS01490	NAD(P)-dependent alcohol dehydrogenase
MSMEG_2399	7934.1	0.78257	0.372141	2.10289	0.0354757	0.94206	3296.48	7683.81	6522.05	7156.71	9780.9	13164.6	MSMEG_RS11625	uracil-DNA glycosylase
MSMEG_6354	18120.1	0.781746	0.360059	2.17116	0.029919	0.86178	7828.94	16422.8	15732.8	16526	22035.9	30174.4	MSMEG_RS30655	cutinase family protein
MSMEG_2015	113.46	0.779003	0.439188	1.77374	0.0761069	0.999304	80.8886	69.8712	101.865	87.3171	243.54	97.2789	MSMEG_RS09770	molybdate ABC transporter permease subunit
MSMEG_6472	134.854	0.778856	0.357191	2.1805	0.0292202	0.86178	74.9568	92.149	131.353	182.872	114.039	213.758	MSMEG_RS31215	hypothetical protein
MSMEG_3470	154.41	0.775526	0.270339	2.86872	0.00412138	0.43252	138.05	94.1742	108.567	186.167	213.903	185.598	MSMEG_RS16860	SDR family oxidoreductase
MSMEG_5341	3454.73	0.775244	0.401317	1.93175	0.0533906	0.999304	1335.2	3521.91	2789.23	2985.26	4165.31	5931.45	MSMEG_RS25740	alpha/beta fold hydrolase
MSMEG_5723	36.8022	0.77438	0.390193	1.98461	0.047188	0.999304	35.0517	25.3157	20.105	39.5398	48.3214	52.4794	MSMEG_RS27590	hypothetical protein
MSMEG_5616	2636.28	0.771876	0.417486	1.84887	0.0644768	0.999304	1087.14	3017.63	1738.41	2318.02	2920.55	4735.95	MSMEG_RS27065	VOC family protein
MSMEG_5319	117.313	0.771791	0.316054	2.44196	0.0146077	0.688681	94.37	71.8964	92.4829	153.217	107.596	184.318	MSMEG_RS25635	carboxymuconolactone decarboxylase family protein
MSMEG_3581	228.885	0.769033	0.274298	2.80364	0.00505292	0.474114	190.358	161.008	154.138	314.671	219.057	334.076	MSMEG_RS17395	SDR family oxidoreductase
MSMEG_0773	1457.2	0.767976	0.345799	2.22087	0.0263596	0.83943	1314.17	998.449	919.468	2281.78	1043.1	2186.22	MSMEG_RS03770	GNAT family N-acetyltransferase
MSMEG_6759	20799.4	0.767613	0.500441	1.53387	0.125061	0.999304	4228.86	22830.7	19121.2	23531.1	27083.8	28001	MSMEG_RS32580	glycerol kinase GlpK
MSMEG_1315	3275.91	0.766677	0.410992	1.86543	0.062121	0.999304	1204.7	3115.85	2956.77	3692.03	2900.57	5785.53	MSMEG_RS06420	mechanosensitive ion channel family protein
MSMEG_5617	5953	0.765577	0.41248	1.85603	0.0634488	0.999304	2306.4	6201.32	4721.99	5846.95	5703.86	10937.5	MSMEG_RS27070	MPT63 family protein
MSMEG_RS15825	6.60477	0.764238	0.807182	0.946798	0.343742	0.999304	3.7748	4.0505	6.70166	14.8274	5.15429	5.11994	MSMEG_RS15825	hypothetical protein
MSMEG_1431	86.2174	0.763653	0.365949	2.08677	0.0369089	0.952893	67.9464	84.048	38.8696	88.9646	101.797	135.678	MSMEG_RS06995	cytochrome P450
MSMEG_0267	14697.6	0.759583	0.483992	1.56941	0.116552	0.999304	3926.87	16506.8	12313.6	15369.5	13486.2	26582.7	MSMEG_RS01315	alpha/beta hydrolase
MSMEG_0601	765.515	0.758851	0.258353	2.93726	0.00331129	0.3847	506.902	608.588	591.086	836.926	818.243	1231.35	MSMEG_RS02920	hypothetical protein
MSMEG_3951	2705.53	0.757126	0.446825	1.69446	0.0901787	0.999304	929.14	2804.97	2302.69	2123.62	4975.18	3097.56	MSMEG_RS19155	hypothetical protein
MSMEG_1335	717.832	0.757088	0.368826	2.0527	0.0401022	0.977171	594.801	377.71	627.275	1049.45	505.764	1151.99	MSMEG_RS06515	Rrf2 family transcriptional regulator
MSMEG_1478	787.939	0.756926	0.341782	2.21465	0.0267841	0.83943	669.758	628.841	459.734	639.227	1420.01	910.07	MSMEG_RS07220	LysE family transporter
MSMEG_2027	1447.74	0.754998	0.185646	4.06686	4.76508e-05	0.0344462	1147.54	1056.17	1026.69	1822.13	1736.99	1896.94	MSMEG_RS09835	nitroreductase family deazaflavin-dependent oxidoreductase
MSMEG_2906	946.013	0.754766	0.380313	1.98459	0.0471899	0.999304	1158.86	496.187	454.372	1217.5	1113.97	1235.19	MSMEG_RS14105	LLM class F420-dependent oxidoreductase
MSMEG_1712	27.9022	0.754157	0.464277	1.62437	0.104297	0.999304	15.6385	32.404	14.7436	34.5974	40.59	29.4397	MSMEG_RS08355	ABC transporter substrate-binding protein
MSMEG_1413	1943.38	0.75135	0.358489	2.09588	0.0360929	0.945461	993.312	1502.74	1852.34	2057.72	3526.18	1727.98	MSMEG_RS06905	ornithine--oxo-acid transaminase
MSMEG_6765	227.528	0.750615	0.332798	2.25547	0.0241039	0.81706	141.285	222.778	146.096	191.109	322.143	341.756	MSMEG_RS32610	ABC transporter permease
MSMEG_3931	8999.39	0.749826	0.55023	1.36275	0.172961	0.999304	1580.02	10235.6	8322.12	8112.25	15089.2	10657.2	MSMEG_RS19055	4Fe-4S dicluster domain-containing protein
MSMEG_5575	693.288	0.748454	0.485211	1.54253	0.122944	0.999304	191.976	765.545	595.107	1125.24	521.872	959.989	MSMEG_RS26870	MarR family transcriptional regulator
MSMEG_5874	127.778	0.74793	0.423015	1.76809	0.0770453	0.999304	71.7212	144.806	71.0376	103.792	233.231	142.078	MSMEG_RS28315	tRNA-Thr
MSMEG_6230	1119.05	0.746829	0.36246	2.06044	0.0393562	0.974076	547.885	1113.89	847.09	902.826	1474.77	1827.82	MSMEG_RS30055	acyltransferase
MSMEG_1077	4063.14	0.742516	0.395621	1.87683	0.0605407	0.999304	1747.73	4687.45	2686.02	3713.45	4798.64	6745.52	MSMEG_RS05240	nitroreductase family deazaflavin-dependent oxidoreductase
MSMEG_0092	1129.58	0.738402	0.317134	2.32836	0.0198931	0.767418	513.373	1129.08	899.363	1406.96	1430.96	1397.74	MSMEG_RS00455	TetR/AcrR family transcriptional regulator
MSMEG_3939	8685.76	0.737777	0.505346	1.45994	0.144306	0.999304	1819.99	10574.9	7142.63	9641.13	11123	11813	MSMEG_RS19090	universal stress protein
MSMEG_3781	32.5074	0.735167	0.454152	1.61877	0.105497	0.999304	25.3451	33.4167	14.7436	29.6549	54.7643	37.1196	MSMEG_RS18330	DUF2236 domain-containing protein
MSMEG_6236	196.085	0.73288	0.400162	1.83146	0.067032	0.999304	197.368	162.02	81.7602	233.944	333.74	167.678	MSMEG_RS30085	two-component system response regulator MnoR
MSMEG_6767	6836.19	0.731545	0.436394	1.67634	0.0936709	0.999304	2407.78	7365.84	5645.48	5525.69	8008.47	12063.9	MSMEG_RS32620	type I polyketide synthase
MSMEG_5542	10190.1	0.731218	0.459212	1.59233	0.11131	0.999304	2945.42	10349	9691.94	9502.74	10889.1	17762.4	MSMEG_RS26705	helix-turn-helix transcriptional regulator
MSMEG_5722	1496.86	0.728049	0.508857	1.43075	0.152501	0.999304	383.412	1374.13	1624.48	1721.63	1120.41	2757.09	MSMEG_RS27585	hypothetical protein
MSMEG_3658	41.3294	0.72587	0.415996	1.7449	0.0810026	0.999304	34.5125	30.3788	29.4873	37.8923	76.0257	39.6795	MSMEG_RS17755	VOC family protein
MSMEG_0697	2260.95	0.725764	0.489508	1.48264	0.138171	0.999304	587.251	2395.87	2129.79	2505.84	1938.01	4008.91	MSMEG_RS03400	phage holin family protein
MSMEG_5543	14526.1	0.723543	0.488485	1.4812	0.138554	0.999304	3785.05	12860.4	16230.1	14657.7	13640.8	25982.4	MSMEG_RS26710	hypothetical protein
MSMEG_0449	2597.1	0.72232	0.299562	2.41125	0.0158978	0.698859	2643.44	1854.12	1380.54	2871.58	3035.23	3797.72	MSMEG_RS02195	MFS transporter
MSMEG_1412	511.59	0.721192	0.396039	1.82101	0.0686053	0.999304	221.635	416.189	524.07	514.018	918.752	474.875	MSMEG_RS06900	amino acid permease
MSMEG_6740	2409.25	0.720817	0.289148	2.4929	0.0126704	0.688681	1862.06	1727.54	1871.1	1991.82	3868.29	3134.68	MSMEG_RS32485	1-aminocyclopropane-1-carboxylate deaminase
MSMEG_3417	3395.95	0.72081	0.413665	1.74249	0.0814219	0.999304	1255.39	3580.65	2860.27	2804.03	4366.33	5509.06	MSMEG_RS16620	activator of HSP90 ATPase
MSMEG_4350	115.759	0.719621	0.316185	2.27595	0.0228491	0.794954	72.7997	115.439	75.0586	146.627	166.87	117.759	MSMEG_RS21055	dihydrodipicolinate reductase
MSMEG_1513	1897.74	0.719242	0.203706	3.53079	0.000414316	0.117197	1647.97	1379.2	1273.32	2362.5	2351.64	2371.81	MSMEG_RS07395	LLM class F420-dependent oxidoreductase
MSMEG_RS16305	61.0216	0.718209	0.471534	1.52313	0.127725	0.999304	75.496	31.3914	30.8276	51.0723	105.663	71.6792	MSMEG_RS16305	hypothetical protein
MSMEG_2172	176.22	0.716147	0.376118	1.90405	0.0569039	0.999304	99.7626	211.639	88.4619	247.124	206.816	203.518	MSMEG_RS10535	hypothetical protein
MSMEG_3273	1650.75	0.716032	0.43258	1.65526	0.0978723	0.999304	496.117	1637.42	1616.44	1611.25	2111.32	2431.97	MSMEG_RS15905	M20/M25/M40 family metallo-hydrolase
MSMEG_6168	11.3734	0.715891	0.685047	1.04503	0.296011	0.999304	7.5496	13.1641	5.36133	4.94248	15.4629	21.7598	MSMEG_RS29765	type II secretion system F family protein
MSMEG_1113	1031.11	0.71534	0.385352	1.85633	0.0634068	0.999304	470.232	1114.9	758.628	810.566	1545	1487.34	MSMEG_RS05415	glycosyltransferase family 1 protein
MSMEG_6306	1105.95	0.714879	0.329877	2.16711	0.0302266	0.863613	687.553	1171.61	654.082	981.906	1549.51	1591.02	MSMEG_RS30425	tRNA glutamyl-Q(34) synthetase GluQRS
MSMEG_1972	50.6139	0.712569	0.47801	1.4907	0.13604	0.999304	45.8369	40.505	26.8066	107.087	37.3686	46.0795	MSMEG_RS09570	2Fe-2S iron-sulfur cluster binding domain-containing protein
MSMEG_3954	5171.19	0.712418	0.470314	1.51477	0.12983	0.999304	1273.73	4942.63	5544.95	5306.57	7262.39	6696.88	MSMEG_RS19165	glycoside hydrolase family 65 protein
MSMEG_2851	139.722	0.712115	0.517894	1.37502	0.169125	0.999304	202.222	56.7071	57.6343	128.504	238.386	154.878	MSMEG_RS13825	hypothetical protein
MSMEG_0637	10630.3	0.7094	0.452901	1.56635	0.117267	0.999304	3248.49	11033.6	9923.82	10845.4	10018.6	18712.1	MSMEG_RS03100	FAD-dependent oxidoreductase
MSMEG_1914	9732.55	0.708648	0.213615	3.31741	0.000908548	0.184719	7595.44	7278.76	7291.4	12837.3	9900.1	13492.3	MSMEG_RS09300	sigma-70 family RNA polymerase sigma factor SigH
MSMEG_6666	726.583	0.706643	0.321904	2.1952	0.0281494	0.851812	371.548	669.346	616.553	822.099	716.446	1163.51	MSMEG_RS32135	hypothetical protein
MSMEG_2853	28.5665	0.705921	0.40422	1.74638	0.0807453	0.999304	21.5703	26.3283	17.4243	29.6549	39.3014	37.1196	MSMEG_RS13835	ABC transporter permease
MSMEG_2114	830.638	0.705919	0.444323	1.58875	0.112116	0.999304	287.424	865.795	742.544	657.35	963.852	1466.86	MSMEG_RS10265	cupin domain-containing protein
MSMEG_3514	179.513	0.704328	0.336131	2.0954	0.0361354	0.945461	169.866	95.1868	144.756	214.174	285.419	167.678	MSMEG_RS17070	hypothetical protein
MSMEG_2296	228.248	0.703043	0.447319	1.57168	0.116024	0.999304	313.848	99.2374	105.886	286.664	291.217	272.637	MSMEG_RS11125	NAD(P)H-dependent oxidoreductase
MSMEG_1710	13.5364	0.701096	0.557609	1.25733	0.208636	0.999304	12.9422	9.11363	8.04199	16.4749	12.8857	21.7598	MSMEG_RS08345	ABC transporter permease
MSMEG_2014	93.1496	0.700514	0.440353	1.5908	0.111655	0.999304	76.5745	58.7323	79.0796	84.0221	193.93	66.5592	MSMEG_RS09765	ATP-binding cassette domain-containing protein
MSMEG_2763	2380.02	0.700493	0.234087	2.99245	0.00276749	0.341387	2022.75	1723.49	1694.18	2647.52	3588.67	2603.49	MSMEG_RS13385	DUF4193 domain-containing protein
MSMEG_6498	690.867	0.69938	0.278906	2.50758	0.0121561	0.688681	553.278	422.265	603.149	945.661	633.977	986.869	MSMEG_RS31345	hypothetical protein
MSMEG_1754	793.357	0.695429	0.249102	2.79175	0.00524237	0.474114	732.311	480.997	601.809	1023.09	869.786	1052.15	MSMEG_RS08535	cupin domain-containing protein
MSMEG_1314	190.814	0.694941	0.265211	2.62033	0.0087844	0.612919	148.835	154.932	134.033	181.224	255.781	270.077	MSMEG_RS06425	SseB family protein
MSMEG_0429	29.0267	0.694049	0.522325	1.32877	0.183924	0.999304	38.8265	14.1768	12.063	34.5974	38.6572	35.8396	MSMEG_RS02100	Fur family transcriptional regulator
MSMEG_6232	9717.86	0.69348	0.404759	1.71331	0.0866549	0.999304	3642.68	9815.38	8822.06	9476.38	9978.7	16572	MSMEG_RS30060	catalase
MSMEG_3598	1204.34	0.692875	0.369498	1.87518	0.0607678	0.999304	671.375	974.146	1119.18	1056.04	2285.28	1119.99	MSMEG_RS17470	sugar ABC transporter xylitol/L-sorbitol-binding protein XypA
MSMEG_3354	130.358	0.691256	0.327611	2.10999	0.0348592	0.929484	133.197	82.0227	83.1006	123.562	184.91	175.358	MSMEG_RS16310	TetR/AcrR family transcriptional regulator
MSMEG_1194	75.88	0.689552	0.310836	2.21838	0.0265289	0.83943	64.7109	51.6439	56.2939	116.972	81.18	84.479	MSMEG_RS05820	hypothetical protein
MSMEG_5649	616.612	0.689299	0.609343	1.13122	0.257964	0.999304	106.773	985.285	324.36	894.589	557.952	830.711	MSMEG_RS27225	AMP-binding protein
MSMEG_1414	3163.18	0.688129	0.3572	1.92646	0.0540475	0.999304	2394.84	1972.6	2903.16	3056.1	6005.39	2647.01	MSMEG_RS06910	dimethylarginine dimethylaminohydrolase family protein
MSMEG_1782	10193.2	0.687715	0.479468	1.43433	0.151478	0.999304	2865.61	10019.9	10541.7	10906.4	8574.16	18251.3	MSMEG_RS08665	SDR family oxidoreductase
MSMEG_RS33675	378.288	0.687512	0.526647	1.30545	0.191739	0.999304	339.732	230.879	300.234	232.296	942.59	223.997	MSMEG_RS33675	hypothetical protein
MSMEG_1063	744.197	0.687356	0.246234	2.79147	0.00524688	0.474114	433.563	646.055	632.637	953.898	865.92	933.109	MSMEG_RS05170	DUF3349 domain-containing protein
MSMEG_1303	712.844	0.68719	0.279538	2.45831	0.0139593	0.688681	571.613	661.245	403.44	995.086	711.292	934.389	MSMEG_RS06370	helix-turn-helix domain-containing protein
MSMEG_1197	4.20025	0.686028	1.09031	0.629204	0.529216	0.999304	4.31406	3.03788	2.68066	1.64749	12.2414	1.27999	MSMEG_RS05835	LuxR family transcriptional regulator
MSMEG_2343	1379.7	0.685472	0.449098	1.52633	0.126927	0.999304	493.96	1520.96	1160.73	968.726	1843.95	2289.89	MSMEG_RS11340	Rieske (2Fe-2S) protein
MSMEG_2790	672.717	0.684964	0.281209	2.43578	0.0148597	0.691775	653.041	475.934	418.184	724.897	1024.41	739.832	MSMEG_RS13520	hypothetical protein
MSMEG_0050	342.405	0.684621	0.287697	2.37966	0.0173286	0.730318	301.445	308.851	175.583	421.758	396.236	450.555	MSMEG_RS00240	DivIVA domain-containing protein
MSMEG_5570	1326.97	0.683907	0.356832	1.91661	0.0552877	0.999304	560.828	1276.92	1218.36	1535.46	1350.42	2019.82	MSMEG_RS26845	ATP-dependent DNA ligase
MSMEG_3439	6937.81	0.683905	0.519017	1.31769	0.187606	0.999304	1591.89	5380.08	9000.33	6573.5	7442.15	11638.9	MSMEG_RS33555	hypothetical protein
MSMEG_3145	5387.17	0.683616	0.479151	1.42672	0.15366	0.999304	1775.77	3103.7	7524.62	7008.43	4788.98	8121.51	MSMEG_RS15270	NlpC/P60 family peptidoglycan endopeptidase RipA
MSMEG_1769	4146.92	0.683314	0.334123	2.0451	0.0408454	0.989877	2100.41	3957.34	3492.9	3548.7	5461.61	6320.57	MSMEG_RS08600	usfY protein
MSMEG_6021	174.077	0.680807	0.280834	2.42423	0.0153409	0.695803	104.616	165.058	132.693	232.296	222.923	186.878	MSMEG_RS29030	xylose isomerase
MSMEG_3374	66.6455	0.67881	0.404977	1.67617	0.093705	0.999304	62.5539	27.3409	64.3359	62.6047	95.9986	87.039	MSMEG_RS16405	DUF2236 domain-containing protein
MSMEG_3944	14976.2	0.67823	0.483163	1.40373	0.160399	0.999304	4101.05	14150.4	16309.2	12445.2	26133.5	16717.9	MSMEG_RS19115	response regulator transcription factor
MSMEG_5498	155.708	0.676893	0.342534	1.97613	0.0481398	0.999304	98.1448	142.78	120.63	118.619	240.319	213.758	MSMEG_RS26490	hemophore-related protein
MSMEG_1911	1311.84	0.676258	0.403975	1.67401	0.094129	0.999304	482.635	1132.12	1416.73	1385.54	1344.62	2109.42	MSMEG_RS09285	catechol 1,2-dioxygenase
MSMEG_0383	7323.94	0.674535	0.275971	2.44422	0.0145166	0.688681	4053.6	5884.37	6991.17	8244.05	8275.85	10494.6	MSMEG_RS01895	hemophore-related protein
MSMEG_6515	9024.62	0.674298	0.375942	1.79363	0.072873	0.999304	3855.69	9135.91	7869.09	9837.18	8430.48	15019.3	MSMEG_RS31430	maltose alpha-D-glucosyltransferase
MSMEG_1477	12535.8	0.673631	0.337821	1.99405	0.0461468	0.999304	6447.36	12836	9701.32	11954.2	13661.4	20614.2	MSMEG_RS07215	MFS transporter
MSMEG_5366	6.1801	0.671596	1.03216	0.650667	0.515261	0.999304	11.3244	2.02525	0	11.5325	5.79857	6.39993	MSMEG_RS25860	hypothetical protein
MSMEG_6884	475.065	0.671112	0.315697	2.12581	0.0335193	0.915468	479.939	344.293	272.087	683.71	427.806	642.553	MSMEG_RS33195	dinucleotide-binding protein
MSMEG_1606	812.696	0.670819	0.326432	2.05501	0.0398784	0.975373	665.983	727.065	489.221	670.53	1374.91	948.469	MSMEG_RS07845	benzoylformate decarboxylase
MSMEG_5323	214.22	0.670629	0.452305	1.48269	0.138156	0.999304	164.473	184.298	148.777	115.325	452.289	220.157	MSMEG_RS25650	GNAT family N-acetyltransferase
MSMEG_3204	168.405	0.668857	0.279588	2.39229	0.0167436	0.721415	105.694	157.97	127.332	186.167	191.353	241.917	MSMEG_RS15560	nitroreductase family deazaflavin-dependent oxidoreductase
MSMEG_4352	647.687	0.668746	0.298565	2.23987	0.0250993	0.833142	670.836	455.682	372.612	751.257	947.1	688.632	MSMEG_RS21065	DUF4185 domain-containing protein
MSMEG_4620	2658.19	0.668	0.411211	1.62447	0.104276	0.999304	1005.71	2799.91	2356.3	2621.16	2596.47	4569.55	MSMEG_RS22290	hypothetical protein
MSMEG_1778	4659.58	0.666244	0.468721	1.42141	0.155198	0.999304	1471.09	5412.49	3924.49	4695.35	4001.02	8453.02	MSMEG_RS08645	hypothetical protein
MSMEG_1623	227.745	0.66561	0.3676	1.81069	0.070189	0.999304	93.8308	247.081	188.987	273.484	272.533	290.557	MSMEG_RS07930	SDR family oxidoreductase
MSMEG_4547	306.208	0.665564	0.561779	1.18474	0.236119	0.999304	496.656	110.376	101.865	332.794	487.08	308.476	MSMEG_RS21955	acyl-CoA dehydrogenase family protein
MSMEG_1777	14447.4	0.664588	0.481744	1.37955	0.167726	0.999304	4136.64	15467.9	13928.7	15618.2	11650.6	25882.6	MSMEG_RS08640	UsfY protein
MSMEG_5651	358.419	0.664212	0.406072	1.6357	0.101903	0.999304	211.389	467.833	152.798	428.348	467.752	422.395	MSMEG_RS27235	GAF domain-containing protein
MSMEG_3022	13457.4	0.663825	0.470448	1.41105	0.158231	0.999304	3544.54	15595.5	12105.9	14232.7	14374	20891.9	MSMEG_RS14680	GlsB/YeaQ/YmgE family stress response membrane protein
MSMEG_0576	1905.92	0.66192	0.514922	1.28548	0.198626	0.999304	2895.81	759.47	772.031	1855.08	3249.78	1903.34	MSMEG_RS02800	MMPL family transporter
MSMEG_0672	19991.8	0.660758	0.47662	1.38634	0.165643	0.999304	6165.33	19487	20824.7	22618.4	14708.4	36146.8	MSMEG_RS03275	GAF domain-containing protein
MSMEG_2337	5463.07	0.660273	0.44851	1.47215	0.140981	0.999304	1983.39	6406.88	4313.19	6250.59	4207.83	9616.53	MSMEG_RS11310	type 2 isopentenyl-diphosphate Delta-isomerase
MSMEG_3947	2054.53	0.660246	0.499774	1.32109	0.186472	0.999304	464.84	2440.43	1873.78	1995.11	2943.1	2609.89	MSMEG_RS19135	1-phosphofructokinase family hexose kinase
MSMEG_6612	2365.86	0.659969	0.468223	1.40952	0.158681	0.999304	794.326	2717.89	1990.39	2491.01	1830.42	4371.15	MSMEG_RS31880	AAA family ATPase
MSMEG_6811	106.192	0.659502	0.280524	2.35096	0.0187249	0.747388	86.8204	83.0353	77.7392	123.562	155.917	110.079	MSMEG_RS32835	DUF2236 domain-containing protein
MSMEG_4798	12.6589	0.657912	0.684648	0.960949	0.336578	0.999304	17.7955	4.0505	6.70166	19.7699	17.3957	10.2399	MSMEG_RS23120	CoA transferase
MSMEG_0432	59.5179	0.65726	0.558122	1.17763	0.238945	0.999304	64.1716	37.4672	37.5293	46.1298	139.81	31.9996	MSMEG_RS02115	uroporphyrinogen-III synthase
MSMEG_0131	638.412	0.65674	0.307765	2.1339	0.0328506	0.911043	436.798	673.396	375.293	967.078	672.634	705.272	MSMEG_RS00645	fatty-acid--CoA ligase FadD5
MSMEG_0496	17.0465	0.655007	0.551485	1.18771	0.234946	0.999304	10.7851	17.2146	12.063	11.5325	18.6843	31.9996	MSMEG_RS02415	diol dehydratase small subunit
MSMEG_4363	7.6861	0.654175	0.742259	0.88133	0.378139	0.999304	8.62812	4.0505	5.36133	4.94248	14.1743	8.9599	MSMEG_RS21115	nuclear transport factor 2 family protein
MSMEG_3563	738.938	0.654019	0.400942	1.63121	0.102846	0.999304	303.602	808.076	612.532	654.055	820.176	1235.19	MSMEG_RS17310	MFS transporter
MSMEG_5496	2410.03	0.653345	0.402458	1.62339	0.104507	0.999304	1054.79	2716.88	1849.66	2227.41	2354.22	4257.23	MSMEG_RS26480	mechanosensitive ion channel
MSMEG_0330	197.745	0.651561	0.484776	1.34405	0.178934	0.999304	61.4753	262.27	138.054	299.844	172.669	252.157	MSMEG_RS01625	GAF domain-containing protein
MSMEG_1016	215.129	0.649914	0.443448	1.46559	0.142759	0.999304	296.052	114.427	89.8022	281.721	284.774	223.997	MSMEG_RS04955	NAD(P)H-dependent oxidoreductase
MSMEG_4804	3195.95	0.649566	0.260544	2.49311	0.0126628	0.688681	1769.84	2749.28	2948.73	3792.53	4019.06	3896.28	MSMEG_RS23150	hemophore-related protein
MSMEG_3138	5752.98	0.649522	0.325941	1.99276	0.0462875	0.999304	2981.01	4918.32	5539.59	7664.14	4986.13	8428.7	MSMEG_RS15235	thioredoxin
MSMEG_5650	393.244	0.648178	0.602641	1.07556	0.282123	0.999304	71.7212	644.03	203.73	527.198	407.189	505.594	MSMEG_RS27230	AMP-binding protein
MSMEG_5557	315.536	0.648048	0.462558	1.40101	0.161212	0.999304	420.081	147.843	168.882	286.664	575.347	294.397	MSMEG_RS26780	hypothetical protein
MSMEG_6615	3880.97	0.647842	0.488718	1.32559	0.184974	0.999304	1034.3	4594.28	3444.65	3346.06	4333.47	6533.05	MSMEG_RS31895	dithiol-disulfide isomerase
MSMEG_0522	387.039	0.646984	0.534303	1.21089	0.225936	0.999304	93.2915	417.202	395.398	425.053	279.62	711.672	MSMEG_RS33480	pp24 protein
MSMEG_0934	2967.35	0.646981	0.353664	1.82936	0.0673451	0.999304	1356.23	2803.96	2779.85	3346.06	2789.76	4728.27	MSMEG_RS04555	YbjN domain-containing protein
MSMEG_3941	1860.37	0.646449	0.465962	1.38734	0.165337	0.999304	534.404	2115.38	1703.56	1612.9	2955.98	2239.97	MSMEG_RS19100	GAF domain-containing sensor histidine kinase
MSMEG_1951	35608	0.646161	0.438508	1.47354	0.140604	0.999304	11085.5	35152.3	37057.5	37641.9	35493.1	57217.9	MSMEG_RS09470	hypothetical protein
MSMEG_5527	2656.24	0.64553	0.380615	1.69602	0.0898822	0.999304	1226.81	2902.19	2086.9	2706.83	2461.82	4552.91	MSMEG_RS26635	hypothetical protein
MSMEG_5328	28908.4	0.644586	0.245024	2.63071	0.00852074	0.612919	20345.1	24536.9	22787	26809.7	38541.8	40429.6	MSMEG_RS25670	DUF4193 domain-containing protein
MSMEG_4649	197.683	0.643445	0.415612	1.54819	0.121577	0.999304	84.1241	141.768	239.919	181.224	316.344	222.717	MSMEG_RS22430	phytanoyl-CoA dioxygenase family protein
MSMEG_1057	5497.16	0.6434	0.441331	1.45786	0.144878	0.999304	2105.26	6387.64	4381.54	5965.57	4287.08	9855.89	MSMEG_RS05140	type 2 isopentenyl-diphosphate Delta-isomerase
MSMEG_5402	7884.41	0.640809	0.543331	1.17941	0.238236	0.999304	1787.1	7203.82	9494.91	9314.92	5379.79	14125.9	MSMEG_RS26030	SDR family NAD(P)-dependent oxidoreductase
MSMEG_6658	13.5859	0.639621	0.566047	1.12998	0.258485	0.999304	14.5599	7.08838	9.38232	16.4749	13.53	20.4798	MSMEG_RS32100	alpha/beta hydrolase
MSMEG_6106	439.709	0.639386	0.3012	2.1228	0.0337707	0.915468	261.001	464.795	305.596	639.227	474.839	492.794	MSMEG_RS29455	alpha/beta hydrolase
MSMEG_1780	596.864	0.638587	0.367409	1.73808	0.0821965	0.999304	327.868	571.121	503.965	413.521	902	862.71	MSMEG_RS08655	divalent metal cation transporter
MSMEG_4209	12.0242	0.638508	0.59692	1.06967	0.284767	0.999304	8.62812	7.08838	13.4033	11.5325	19.9729	11.5199	MSMEG_RS20370	tripartite tricarboxylate transporter TctB family protein
MSMEG_6467	26292.8	0.636577	0.439326	1.44899	0.147341	0.999304	8247.94	28816.3	24690.3	26901.9	26915.7	42184.5	MSMEG_RS31190	DNA starvation/stationary phase protection protein
MSMEG_2494	48.1053	0.636504	0.384691	1.65458	0.0980087	0.999304	40.4443	38.4798	34.8486	52.7198	81.18	40.9595	MSMEG_RS12095	M24 family metallopeptidase
MSMEG_3146	885.965	0.63618	0.406531	1.5649	0.117607	0.999304	392.579	537.704	1152.69	1059.34	874.296	1299.19	MSMEG_RS15275	NlpC/P60 family peptidoglycan endopeptidase RipB
MSMEG_0600	3389.03	0.635584	0.24473	2.59709	0.00940181	0.612919	2237.38	2641.94	3085.44	3629.43	3781.31	4958.66	MSMEG_RS02915	SDR family oxidoreductase
MSMEG_3400	524.51	0.634932	0.435549	1.45778	0.144902	0.999304	371.548	455.682	407.461	439.881	1132.01	340.476	MSMEG_RS16535	FCD domain-containing protein
MSMEG_6356	1238.71	0.633994	0.339271	1.8687	0.0616649	0.999304	1073.12	925.54	915.447	1029.68	2287.86	1200.63	MSMEG_RS30665	helix-turn-helix domain-containing protein
MSMEG_6466	2789.64	0.633942	0.434308	1.45966	0.144384	0.999304	1086.06	3374.07	2100.3	2271.89	3118.34	4787.15	MSMEG_RS31185	aquaporin Z
MSMEG_6212	14066.3	0.63364	0.441443	1.43538	0.151178	0.999304	4457.5	14275	14346.9	15035	13188.5	23094.8	MSMEG_RS29960	hemerythrin domain-containing protein
MSMEG_3936	2042.36	0.633493	0.535662	1.18264	0.236954	0.999304	395.815	2553.84	1855.02	1899.56	2964.36	2585.57	MSMEG_RS19080	universal stress protein
MSMEG_2425	910.157	0.631936	0.429453	1.47149	0.141158	0.999304	730.154	672.384	741.203	690.3	1976.67	650.233	MSMEG_RS11755	ammonium transporter
MSMEG_3164	746.819	0.631164	0.241137	2.61745	0.00885895	0.612919	548.964	546.818	664.805	846.811	1095.29	778.231	MSMEG_RS15365	hypothetical protein
MSMEG_1896	36.6285	0.62911	0.363747	1.72953	0.0837146	0.999304	26.9629	25.3157	34.8486	39.5398	45.7443	47.3595	MSMEG_RS09210	acetyl-CoA C-acetyltransferase
MSMEG_2141	36.0221	0.628443	0.58802	1.06875	0.285184	0.999304	53.3865	17.2146	13.4033	39.5398	64.4286	28.1597	MSMEG_RS10385	hypothetical protein
MSMEG_RS27520	52.6279	0.627551	0.41406	1.5156	0.12962	0.999304	57.1613	34.4293	32.168	57.6623	88.2672	46.0795	MSMEG_RS27520	ESX-1 secretion-associated protein
MSMEG_4464	1175.37	0.627254	0.223885	2.80168	0.00508379	0.474114	1108.71	789.848	871.216	1400.37	1467.68	1414.38	MSMEG_RS21570	TldD/PmbA family protein
MSMEG_6141	1458.46	0.625208	0.354378	1.76424	0.0776915	0.999304	642.795	1410.59	1389.92	1678.8	1429.67	2199.01	MSMEG_RS29630	amidohydrolase family protein
MSMEG_3427	77.799	0.624181	0.313111	1.99348	0.0462086	0.999304	51.7687	53.6692	79.0796	103.792	85.0457	93.4389	MSMEG_RS16670	MBL fold metallo-hydrolase
MSMEG_4916	13009.6	0.623307	0.384555	1.62085	0.105049	0.999304	5406.59	12955.5	12365.9	12324.9	13551.9	21452.6	MSMEG_RS23695	alpha-1,4-glucan--maltose-1-phosphate maltosyltransferase
MSMEG_5401	4160.84	0.622806	0.464716	1.34019	0.180185	0.999304	1227.89	4073.79	4528.98	4298.31	3801.29	7034.8	MSMEG_RS26025	SRPBCC family protein
MSMEG_RS11630	8432.51	0.622796	0.315178	1.97601	0.0481535	0.999304	4401.96	8037.21	7483.07	8291.83	9382.74	12998.3	MSMEG_RS11630	hypothetical protein
MSMEG_6107	586.067	0.622175	0.314501	1.97829	0.0478956	0.999304	361.302	620.74	402.1	815.509	523.16	793.591	MSMEG_RS29460	LLM class flavin-dependent oxidoreductase
MSMEG_5590	4371.85	0.621553	0.38675	1.60712	0.108028	0.999304	1917.06	4846.43	3570.64	4433.4	4129.23	7334.32	MSMEG_RS26945	glutamate--cysteine ligase
MSMEG_0684	3204.53	0.621407	0.372049	1.67023	0.0948736	0.999304	1455.99	3233.31	2887.07	2749.67	3664.7	5236.42	MSMEG_RS03335	xanthine dehydrogenase family protein molybdopterin-binding subunit
MSMEG_3787	459.2	0.620563	0.347833	1.78408	0.0744106	0.999304	400.668	267.333	419.524	428.348	813.089	426.235	MSMEG_RS18360	D-aminoacylase
MSMEG_RS02405	8.53743	0.620558	0.655411	0.946822	0.34373	0.999304	5.39257	7.08838	8.04199	8.23746	9.66429	12.7999	MSMEG_RS02405	hypothetical protein
MSMEG_4858	14.1456	0.618079	0.536577	1.15189	0.249365	0.999304	12.4029	10.1263	10.7227	21.4174	18.6843	11.5199	MSMEG_RS23410	TetR family transcriptional regulator
MSMEG_1023	1438.51	0.617501	0.319506	1.93267	0.0532765	0.999304	864.969	1633.37	908.745	1583.24	2089.42	1551.34	MSMEG_RS04990	OFA family MFS transporter
MSMEG_6761	15901.3	0.616747	0.497837	1.23885	0.2154	0.999304	3579.59	19852.5	14229	18588.7	17994.9	21163.3	MSMEG_RS32585	glycerol-3-phosphate dehydrogenase/oxidase
MSMEG_6541	1774.3	0.615873	0.240999	2.5555	0.0106036	0.650538	1342.21	1589.82	1271.97	1766.11	2093.93	2581.73	MSMEG_RS31545	STAS domain-containing protein
MSMEG_0780	178.203	0.615114	0.642335	0.957622	0.338253	0.999304	147.217	106.326	170.222	98.8496	487.724	58.8793	MSMEG_RS03805	phosphotransferase
MSMEG_4648	45.6306	0.613377	0.381898	1.60613	0.108246	0.999304	39.905	41.5177	26.8066	54.3673	70.2272	40.9595	MSMEG_RS22425	LacI family DNA-binding transcriptional regulator
MSMEG_6739	10697.9	0.611146	0.419815	1.45575	0.145461	0.999304	4009.38	9425.52	11962.5	11224.4	9588.26	17977.4	MSMEG_RS32480	hypothetical protein
MSMEG_6510	161.867	0.609708	0.292513	2.08438	0.0371255	0.954221	118.637	150.881	116.609	148.274	240.963	195.838	MSMEG_RS31405	ABC transporter permease
MSMEG_1781	975.132	0.607676	0.454883	1.3359	0.181583	0.999304	311.691	972.121	1036.08	853.401	1022.48	1655.02	MSMEG_RS08660	hypothetical protein
MSMEG_0889	1153.25	0.605625	0.259645	2.33251	0.0196739	0.766457	684.318	1142.24	919.468	1344.35	1490.23	1338.86	MSMEG_RS04335	aldehyde dehydrogenase family protein
MSMEG_0671	16826	0.605336	0.381557	1.58649	0.112628	0.999304	6983.92	16150.4	16908.3	15646.2	18400.2	26866.9	MSMEG_RS03270	glutathione-dependent formaldehyde dehydrogenase
MSMEG_6823	643.189	0.602266	0.296864	2.02876	0.042483	0.999304	653.58	419.227	459.734	602.982	977.382	746.231	MSMEG_RS32895	SDR family oxidoreductase
MSMEG_3444	758.372	0.601102	0.302129	1.98955	0.0466402	0.999304	472.929	614.664	722.439	657.35	911.664	1171.19	MSMEG_RS16740	GMC family oxidoreductase N-terminal domain-containing protein
MSMEG_6616	15854.9	0.600901	0.543685	1.10524	0.269057	0.999304	3356.88	17407	17037	16862.1	12276.2	28190.4	MSMEG_RS31900	glutathione-dependent formaldehyde dehydrogenase
MSMEG_6836	89.6985	0.600465	0.385834	1.55628	0.119641	0.999304	73.339	91.1363	48.2519	93.9071	77.9586	153.598	MSMEG_RS32955	iron-sulfur cluster-binding domain-containing protein
MSMEG_3421	607.711	0.600209	0.209882	2.85974	0.00423993	0.437857	428.71	517.452	503.965	718.307	685.52	792.311	MSMEG_RS16640	MHS family MFS transporter
MSMEG_1817	2731.22	0.599448	0.304184	1.97067	0.0487614	0.999304	1470.02	2713.84	2333.52	2690.36	3192.44	3987.15	MSMEG_RS08830	GtrA family protein
MSMEG_0055	384.273	0.598984	0.325623	1.8395	0.0658413	0.999304	314.926	295.687	308.276	337.736	681.654	367.356	MSMEG_RS00265	type VII secretion system ESX-1 associated protein EspE
MSMEG_5987	16.9143	0.596808	0.627615	0.950913	0.341649	0.999304	21.5703	13.1641	5.36133	13.1799	31.57	16.6398	MSMEG_RS28860	response regulator transcription factor
MSMEG_5473	1463.66	0.594177	0.335756	1.76967	0.0767822	0.999304	721.526	1279.96	1499.83	1471.21	1566.9	2242.53	MSMEG_RS26370	amino acid permease
MSMEG_2199	675.821	0.592622	0.259633	2.28254	0.0224575	0.793806	523.08	620.74	474.477	642.522	991.556	802.551	MSMEG_RS10670	hypothetical protein
MSMEG_1912	367.9	0.591161	0.31142	1.89827	0.0576599	0.999304	202.222	321.002	359.209	382.218	389.793	552.954	MSMEG_RS09290	muconolactone Delta-isomerase
MSMEG_2496	127.107	0.591062	0.443363	1.33313	0.182488	0.999304	159.081	70.8838	73.7182	140.037	222.923	95.9989	MSMEG_RS12105	D-2-hydroxyacid dehydrogenase
MSMEG_1605	14365.3	0.590715	0.436925	1.35198	0.17638	0.999304	5023.18	15398	13974.3	14397.4	12820.6	24578.3	MSMEG_RS07840	phosphate signaling complex protein PhoU
MSMEG_1097	24518.5	0.590706	0.429455	1.37548	0.168984	0.999304	8761.85	26486.2	23457.1	23824.4	23024.2	41557.3	MSMEG_RS05340	glycosyltransferase
MSMEG_3946	7859.2	0.589665	0.487525	1.20951	0.226468	0.999304	1844.8	8183.03	8799.28	8130.38	10398.1	9799.57	MSMEG_RS19125	hypothetical protein
MSMEG_RS12390	1036.89	0.589555	0.35027	1.68315	0.0923468	0.999304	561.367	1152.37	770.691	1031.33	1013.46	1692.14	MSMEG_RS12390	hypothetical protein
MSMEG_2061	21.1731	0.589139	0.537829	1.0954	0.273341	0.999304	26.9629	10.1263	12.063	32.9499	20.6171	24.3197	MSMEG_RS10005	NADH-quinone oxidoreductase subunit C
MSMEG_0357	754.225	0.588777	0.326968	1.80071	0.0717479	0.999304	392.04	687.573	729.14	797.387	749.304	1169.91	MSMEG_RS01760	MFS transporter
MSMEG_6760	1029.46	0.58877	0.277753	2.11976	0.0340262	0.918567	589.408	1074.4	804.199	1224.09	1184.2	1300.47	MSMEG_RS32590	SRPBCC domain-containing protein
MSMEG_1659	605.766	0.586993	0.336204	1.74594	0.0808207	0.999304	359.685	604.538	489.221	550.263	604.34	1026.55	MSMEG_RS08100	multidrug efflux SMR transporter
MSMEG_6199	75.4618	0.584785	0.407161	1.43625	0.150931	0.999304	30.7377	77.9722	73.7182	90.6121	79.8914	99.8389	MSMEG_RS29910	WhiB family transcriptional regulator
MSMEG_6028	65.25	0.584351	0.339172	1.72287	0.0849115	0.999304	58.7791	51.6439	46.9116	62.6047	102.441	69.1192	MSMEG_RS29065	LysR family transcriptional regulator
MSMEG_4457	20.6358	0.584348	0.494541	1.1816	0.237366	0.999304	23.7273	14.1768	10.7227	26.3599	28.3486	20.4798	MSMEG_RS21535	Lrp/AsnC family transcriptional regulator
MSMEG_2635	14.773	0.583698	0.602615	0.968609	0.33274	0.999304	14.0207	17.2146	4.021	14.8274	23.1943	15.3598	MSMEG_RS12785	ABC transporter permease
MSMEG_1772	6630.95	0.582513	0.431126	1.35114	0.17665	0.999304	2273.51	7565.33	6093.15	6145.15	7106.47	10602.1	MSMEG_RS08615	CDGSH iron-sulfur domain-containing protein
MSMEG_4618	6547.81	0.58166	0.525929	1.10597	0.268741	0.999304	1583.26	7583.56	6570.31	7331.34	4753.54	11464.8	MSMEG_RS22285	cysteine hydrolase
MSMEG_2344	2373.78	0.581186	0.460569	1.26189	0.206989	0.999304	826.682	2677.38	2203.51	1713.39	2693.76	4127.95	MSMEG_RS11345	FAD-dependent oxidoreductase
MSMEG_1021	25.6953	0.580367	0.44495	1.30434	0.192117	0.999304	23.7273	22.2778	16.084	21.4174	39.9457	30.7196	MSMEG_RS04985	VOC family protein
MSMEG_1773	15000.4	0.580103	0.36298	1.59817	0.110005	0.999304	6701.89	14790.4	14582.8	15710.5	14606	23610.6	MSMEG_RS08620	iron-containing redox enzyme family protein
MSMEG_3305	686.246	0.579803	0.371414	1.56107	0.118508	0.999304	330.565	761.495	560.259	561.795	867.853	1035.51	MSMEG_RS16040	DMT family transporter
MSMEG_3460	3113.86	0.578844	0.309013	1.8732	0.0610404	0.999304	1768.76	2852.57	2873.67	2650.82	4199.46	4337.87	MSMEG_RS16810	fur family transcriptional regulator FurA2
MSMEG_6866	120.8	0.578409	0.329846	1.75357	0.0795039	0.999304	97.0663	123.54	68.3569	182.872	121.126	131.838	MSMEG_RS33100	ABC transporter permease
MSMEG_3943	10388	0.57802	0.492109	1.17458	0.240164	0.999304	2533.97	12265.9	10205.3	9609.83	15292.1	12421	MSMEG_RS19110	NAD(P)H nitroreductase
MSMEG_6610	1126.15	0.577419	0.359931	1.60425	0.108659	0.999304	534.943	1184.77	993.186	1014.86	1257.65	1771.5	MSMEG_RS31875	DUF58 domain-containing protein
MSMEG_5799	3336.69	0.577408	0.289948	1.99142	0.0464351	0.999304	2099.87	3397.36	2537.25	3125.29	3885.04	4975.3	MSMEG_RS27950	NAD(P)H-binding protein
MSMEG_2303	1454.52	0.57696	0.309095	1.86661	0.0619554	0.999304	867.126	1655.64	981.123	1573.36	2019.19	1630.7	MSMEG_RS11160	OFA family MFS transporter
MSMEG_5741	840.309	0.576496	0.355102	1.62347	0.10449	0.999304	455.672	631.879	939.573	761.142	1370.4	883.19	MSMEG_RS27675	YdcF family protein
MSMEG_1024	151.576	0.575188	0.289615	1.98604	0.0470284	0.999304	94.37	150.881	121.97	158.159	203.594	180.478	MSMEG_RS33490	hypothetical protein
MSMEG_3310	3500.35	0.575009	0.405373	1.41847	0.156055	0.999304	1370.25	3456.09	3610.85	3351	3443.71	5770.17	MSMEG_RS16065	DUF1206 domain-containing protein
MSMEG_6606	254.452	0.574589	0.442957	1.29716	0.194575	0.999304	97.6056	294.674	222.495	197.699	289.284	424.955	MSMEG_RS31855	hypothetical protein
MSMEG_5047	254.402	0.574147	0.259984	2.20839	0.0272169	0.839903	225.949	185.311	199.709	372.333	251.271	291.837	MSMEG_RS24340	multidrug effflux MFS transporter
MSMEG_4619	119.625	0.57356	0.319249	1.79659	0.0724004	0.999304	83.0456	110.376	96.5039	97.2021	153.984	176.638	MSMEG_RS22295	cytochrome P450
MSMEG_5389	522.864	0.572624	0.388052	1.47563	0.140042	0.999304	247.519	451.631	564.28	408.578	611.427	853.75	MSMEG_RS25970	LysA protein
MSMEG_0268	766.586	0.572314	0.311698	1.83612	0.06634	0.999304	451.898	742.255	658.103	650.76	1135.23	961.269	MSMEG_RS01320	GntR family transcriptional regulator
MSMEG_3418	9600.73	0.572132	0.464494	1.23173	0.218049	0.999304	2902.82	9615.9	10647.6	9069.45	9213.93	16154.7	MSMEG_RS16625	SRPBCC family protein
MSMEG_4856	41.4644	0.570539	0.449869	1.26823	0.204714	0.999304	44.2191	36.4545	17.4243	57.6623	34.1472	58.8793	MSMEG_RS23400	cytochrome P450
MSMEG_0535	1145.85	0.567805	0.403551	1.40702	0.159421	0.999304	471.311	1268.82	1030.72	1112.06	1088.84	1903.34	MSMEG_RS02600	GntR family transcriptional regulator
MSMEG_RS08985	1237.58	0.567395	0.382089	1.48498	0.137549	0.999304	499.892	1145.28	1348.37	1406.96	1209.97	1815.02	MSMEG_RS08985	dehydrogenase
MSMEG_2831	48.6024	0.565185	0.364517	1.5505	0.121021	0.999304	42.0621	36.4545	40.21	41.1873	75.3814	56.3194	MSMEG_RS13720	hypothetical protein
MSMEG_0651	185.164	0.564217	0.247622	2.27855	0.0226941	0.793806	131.579	174.172	143.416	225.707	233.876	202.238	MSMEG_RS03165	hypothetical protein
MSMEG_1751	593.771	0.564023	0.323539	1.74329	0.0812821	0.999304	613.136	435.429	386.016	780.912	472.906	874.23	MSMEG_RS08525	aldo/keto reductase
MSMEG_3141	13999.2	0.563924	0.568647	0.991694	0.321347	0.999304	2552.31	13733.2	17607.9	16287.1	10635.2	23179.3	MSMEG_RS15250	hypothetical protein
MSMEG_2534	311.104	0.563621	0.284145	1.98357	0.0473041	0.999304	203.839	283.535	265.386	454.708	282.841	376.316	MSMEG_RS12290	alpha/beta hydrolase
MSMEG_1771	39426.4	0.563194	0.443041	1.2712	0.203656	0.999304	13244.7	48407.6	33830	40833.1	37189.5	63053.4	MSMEG_RS08610	methyltransferase
MSMEG_6859	675.588	0.563145	0.499247	1.12799	0.259324	0.999304	1076.9	303.788	253.323	795.739	786.673	837.11	MSMEG_RS33065	SDR family oxidoreductase
MSMEG_1788	14414.4	0.562847	0.429344	1.31095	0.189876	0.999304	4865.72	16185.8	13863.1	15236	13886.3	22449.7	MSMEG_RS08690	hypothetical protein
MSMEG_6668	203.925	0.562653	0.263603	2.13447	0.0328046	0.911043	147.217	197.462	150.117	252.066	271.889	204.798	MSMEG_RS32145	extracellular solute-binding protein
MSMEG_4499	3052.7	0.562592	0.415846	1.35288	0.176093	0.999304	1539.04	2472.83	3383	4517.43	1842.01	4561.87	MSMEG_RS33670	hypothetical protein
MSMEG_4687	200.267	0.561292	0.404236	1.38853	0.164977	0.999304	235.655	131.641	117.949	179.577	357.579	179.198	MSMEG_RS22610	nucleoside deaminase
MSMEG_4137	15.1179	0.560889	0.539599	1.03946	0.298593	0.999304	13.4814	14.1768	9.38232	13.1799	25.1271	15.3598	MSMEG_RS20015	hypothetical protein
MSMEG_3386	301.955	0.559715	0.481525	1.16238	0.24508	0.999304	454.594	147.843	127.332	406.931	264.157	410.875	MSMEG_RS16460	MHS family MFS transporter
MSMEG_1910	1101.78	0.558921	0.391283	1.42843	0.153168	0.999304	464.84	999.462	1210.32	1087.35	1072.09	1776.62	MSMEG_RS09280	muconate cycloisomerase
MSMEG_2757	1994.11	0.557696	0.329847	1.69077	0.0908804	0.999304	2441.22	1217.18	1179.49	2352.62	2472.77	2301.41	MSMEG_RS13360	DUF952 domain-containing protein
MSMEG_3541	1444.62	0.557245	0.405999	1.37253	0.169899	0.999304	551.66	1430.84	1526.64	1276.81	1664.83	2216.93	MSMEG_RS17205	cytochrome c biogenesis protein CcdA
MSMEG_0523	563.892	0.556829	0.427749	1.30176	0.192997	0.999304	228.106	637.954	503.965	565.09	470.329	977.909	MSMEG_RS02540	helix-turn-helix transcriptional regulator
MSMEG_2112	14905.6	0.555905	0.470704	1.18101	0.2376	0.999304	4403.58	15242	16562.5	13474.8	14778	24972.5	MSMEG_RS10255	hypothetical protein
MSMEG_1792	1265.35	0.552706	0.541181	1.0213	0.307114	0.999304	289.042	1287.05	1502.51	1434.97	892.336	2186.22	MSMEG_RS08710	hypothetical protein
MSMEG_5876	1082.72	0.548825	0.274624	1.99846	0.045667	0.999304	806.729	1108.83	722.439	1039.57	1284.06	1534.7	MSMEG_RS28320	HNH endonuclease
MSMEG_0257	310.663	0.548346	0.277726	1.97441	0.0483347	0.999304	278.796	259.232	219.814	308.081	478.06	319.996	MSMEG_RS01265	fatty-acid--CoA ligase FadD4
MSMEG_5343	6904.9	0.547578	0.427524	1.28081	0.20026	0.999304	2494.07	7824.56	6512.67	6726.71	6561.41	11310	MSMEG_RS25750	hypothetical protein
MSMEG_6566	402.469	0.546541	0.527598	1.0359	0.300247	0.999304	166.631	268.346	546.855	556.853	188.776	687.352	MSMEG_RS33625	hypothetical protein
MSMEG_4143	51.2977	0.546442	0.414742	1.31755	0.187655	0.999304	59.8576	32.404	32.168	59.3097	79.2472	44.7995	MSMEG_RS20045	DUF1330 domain-containing protein
MSMEG_4883	59.0141	0.545555	0.455013	1.19899	0.230532	0.999304	79.8101	25.3157	37.5293	67.5472	78.6029	65.2793	MSMEG_RS23535	long-chain fatty acid--CoA ligase
MSMEG_2959	2407.32	0.544815	0.446842	1.21926	0.222747	0.999304	791.63	2454.61	2629.73	2141.74	2504.34	3921.88	MSMEG_RS14370	4-aminobutyrate--2-oxoglutarate transaminase
MSMEG_1793	1581.85	0.544458	0.436618	1.24699	0.212401	0.999304	609.9	1369.07	1883.17	1423.43	1458.66	2746.85	MSMEG_RS08720	hypothetical protein
MSMEG_1082	220.929	0.544124	0.601147	0.905143	0.36539	0.999304	213.546	166.071	160.84	128.504	573.414	83.199	MSMEG_RS05265	response regulator transcription factor
MSMEG_0764	941.074	0.543802	0.275999	1.9703	0.0488039	0.999304	708.584	925.54	663.464	879.761	1057.27	1411.82	MSMEG_RS03725	Na+/H+ antiporter
MSMEG_5853	34.3513	0.543508	0.665318	0.816915	0.413977	0.999304	58.7791	18.2273	5.36133	42.8348	39.9457	40.9595	MSMEG_RS28210	cytochrome P450
MSMEG_1736	8406.37	0.542854	0.346901	1.56487	0.117614	0.999304	4161.45	8880.73	7488.43	9077.69	7795.86	13034.1	MSMEG_RS08455	glycerol-3-phosphate dehydrogenase/oxidase
MSMEG_6751	708.88	0.541012	0.376337	1.43757	0.150555	0.999304	363.999	774.659	593.767	942.366	519.939	1058.55	MSMEG_RS32540	hypothetical protein
MSMEG_4028	96.0244	0.539368	0.322083	1.67462	0.0940084	0.999304	97.0663	78.9848	56.2939	126.857	94.0657	122.879	MSMEG_RS19510	hypothetical protein
MSMEG_5022	891.226	0.538268	0.476004	1.13081	0.258137	0.999304	275.021	1205.02	700.994	1192.78	737.063	1236.47	MSMEG_RS24215	NAD(P)/FAD-dependent oxidoreductase
MSMEG_6858	572.47	0.537662	0.592699	0.907143	0.364331	0.999304	1018.12	216.702	164.861	546.968	892.98	595.193	MSMEG_RS33060	epoxide hydrolase
MSMEG_2532	173.779	0.537538	0.276588	1.94346	0.0519604	0.999304	144.521	168.096	111.248	240.534	197.796	180.478	MSMEG_RS12280	3-dehydroquinate dehydratase
MSMEG_1784	517.027	0.537251	0.411152	1.3067	0.191316	0.999304	208.153	526.566	532.112	518.96	466.463	849.91	MSMEG_RS08675	DNA topoisomerase IB
MSMEG_5243	15660.5	0.536895	0.469727	1.14299	0.253041	0.999304	4166.84	15620.8	18552.9	18993.9	15542.1	21086.5	MSMEG_RS25275	pyridoxamine 5'-phosphate oxidase family protein
MSMEG_3254	12551.6	0.536552	0.474742	1.1302	0.258393	0.999304	3385.46	14183.9	13164.7	11568.7	14318	18689.1	MSMEG_RS15815	RDD family protein
MSMEG_1001	4144.46	0.536254	0.444598	1.20615	0.227758	0.999304	1543.35	4684.41	3921.81	4528.96	3104.81	7083.44	MSMEG_RS04875	GNAT family N-acetyltransferase
MSMEG_1790	20625.3	0.535863	0.465575	1.15097	0.249744	0.999304	5942.08	22024.6	22549.7	20695.8	20110.1	32429.7	MSMEG_RS08700	Rho termination factor N-terminal domain-containing protein
MSMEG_3945	15811.3	0.535592	0.516386	1.03719	0.299645	0.999304	3586.6	14112	21032.5	14216.2	22249.8	19670.8	MSMEG_RS19120	universal stress protein
MSMEG_2037	3913.19	0.53487	0.389491	1.37325	0.169674	0.999304	1697.04	4464.67	3427.23	4061.07	3573.85	6255.29	MSMEG_RS09885	LLM class F420-dependent oxidoreductase
MSMEG_3311	1027.75	0.534517	0.460778	1.16003	0.246035	0.999304	331.643	957.944	1230.42	995.086	943.879	1707.5	MSMEG_RS16070	hypothetical protein
MSMEG_5321	22.0103	0.533993	0.479689	1.11321	0.265619	0.999304	24.2666	12.1515	17.4243	19.7699	31.57	26.8797	MSMEG_RS25640	hypothetical protein
MSMEG_0828	404.917	0.531238	0.301679	1.76094	0.0782488	0.999304	373.705	347.331	273.428	377.276	650.729	407.035	MSMEG_RS04035	MPT63 family protein
MSMEG_6501	1084.96	0.52994	0.248622	2.13151	0.0330474	0.911043	720.448	874.909	1070.93	1110.41	1291.79	1441.26	MSMEG_RS31360	hypothetical protein
MSMEG_1655	522.39	0.529835	0.229906	2.30457	0.0211906	0.767418	420.621	471.884	391.377	522.255	704.849	623.353	MSMEG_RS08080	alpha/beta hydrolase
MSMEG_2341	148.321	0.529421	0.407101	1.30047	0.193441	0.999304	86.8204	168.096	111.248	97.2021	240.963	185.598	MSMEG_RS11335	DUF2784 domain-containing protein
MSMEG_1112	11547.3	0.528796	0.456758	1.15772	0.24698	0.999304	3747.84	12031	12585.7	10993.7	10441.3	19483.9	MSMEG_RS05420	aconitate hydratase
MSMEG_6139	206.114	0.527727	0.404848	1.30352	0.192397	0.999304	79.2708	220.752	207.751	240.534	201.661	286.717	MSMEG_RS29625	TetR/AcrR family transcriptional regulator
MSMEG_2042	203.022	0.526994	0.315505	1.67032	0.0948562	0.999304	215.164	155.944	127.332	219.117	303.459	197.118	MSMEG_RS09910	phosphotransferase family protein
MSMEG_2864	30.4092	0.525391	0.386266	1.36018	0.173773	0.999304	28.5806	20.2525	25.4663	36.2448	34.7914	37.1196	MSMEG_RS13890	hypothetical protein
MSMEG_2536	521.338	0.524895	0.362737	1.44704	0.147886	0.999304	267.472	557.957	457.053	815.509	427.162	602.873	MSMEG_RS12300	3-oxoacyl-ACP reductase FabG
MSMEG_1787	5319.81	0.524488	0.505906	1.03673	0.299862	0.999304	1402.61	6691.43	4996.76	5598.18	4316.07	8913.82	MSMEG_RS08680	ATP-binding protein
MSMEG_4570	707.227	0.522279	0.328511	1.58984	0.111871	0.999304	352.674	643.018	747.905	784.207	728.687	986.869	MSMEG_RS22070	circularly permuted type 2 ATP-grasp protein
MSMEG_0426	50.8679	0.52215	0.366126	1.42615	0.153825	0.999304	50.6902	35.4419	38.8696	42.8348	61.8514	75.5191	MSMEG_RS02085	PLP-dependent aminotransferase family protein
MSMEG_6664	5161.92	0.521669	0.445491	1.171	0.2416	0.999304	1898.19	6342.08	4476.71	4955.66	4490.03	8808.86	MSMEG_RS32125	methylenetetrahydrofolate reductase
MSMEG_1774	9768.64	0.521216	0.468202	1.11323	0.265611	0.999304	3396.78	9356.66	11316.4	10721.9	6846.18	16973.9	MSMEG_RS08625	DUF4383 domain-containing protein
MSMEG_2994	17.0209	0.520844	0.526287	0.989658	0.322341	0.999304	20.4918	10.1263	10.7227	16.4749	22.55	21.7598	MSMEG_RS14540	amidohydrolase
MSMEG_3666	405.461	0.520671	0.347179	1.49972	0.133687	0.999304	404.443	300.75	294.873	393.751	708.714	330.236	MSMEG_RS17795	sterol desaturase family protein
MSMEG_6376	99.2702	0.520324	0.291219	1.78671	0.0739838	0.999304	67.9464	100.25	77.7392	112.03	128.857	108.799	MSMEG_RS30755	LacI family DNA-binding transcriptional regulator
MSMEG_2115	18051.4	0.520141	0.504918	1.03015	0.30294	0.999304	4603.64	19314.8	20579.5	15755	17668.9	30386.9	MSMEG_RS10260	hypothetical protein
MSMEG_1775	7418.37	0.519635	0.529204	0.981917	0.326141	0.999304	1766.61	9147.05	7377.19	7263.8	5998.3	12957.3	MSMEG_RS08630	cytochrome P450
MSMEG_5154	140.146	0.518156	0.29552	1.75337	0.0795386	0.999304	100.841	103.288	143.416	174.634	189.42	129.279	MSMEG_RS24850	DUF1059 domain-containing protein
MSMEG_3977	88.8489	0.516971	0.320754	1.61174	0.107019	0.999304	85.2027	81.0101	52.2729	107.087	120.481	87.039	MSMEG_RS19260	TIGR03621 family F420-dependent LLM class oxidoreductase
MSMEG_5400	3729.73	0.51656	0.429322	1.2032	0.228899	0.999304	1405.3	4290.5	3513.01	2965.49	4231.67	5972.41	MSMEG_RS26020	NAD(P)/FAD-dependent oxidoreductase
MSMEG_1360	1842.52	0.516147	0.476389	1.08346	0.278606	0.999304	575.388	2023.23	1951.52	1937.45	1426.45	3141.08	MSMEG_RS06640	endonuclease/exonuclease/phosphatase family protein
MSMEG_2523	6.42951	0.514908	0.741271	0.694629	0.487288	0.999304	4.85332	6.07576	5.36133	4.94248	9.66429	7.67991	MSMEG_RS12240	FtsX-like permease family protein
MSMEG_1515	2674.24	0.51472	0.231471	2.22369	0.0261694	0.83943	1920.83	2236.89	2448.79	3375.71	2579.08	3484.12	MSMEG_RS07405	cyclic nucleotide-binding domain-containing protein
MSMEG_5187	1315.7	0.51455	0.27305	1.88445	0.0595036	0.999304	917.816	1338.69	995.867	1181.25	1745.37	1715.18	MSMEG_RS25010	tetracycline efflux MFS transporter Tet(V)
MSMEG_2920	419.655	0.513717	0.475714	1.07989	0.280193	0.999304	648.187	219.74	167.541	428.348	583.079	471.035	MSMEG_RS14175	aldo/keto reductase
MSMEG_0358	1171.97	0.512055	0.292161	1.75264	0.079663	0.999304	645.491	1201.99	1053.5	1252.09	1547.57	1331.18	MSMEG_RS01765	R2-like ligand-binding oxidase
MSMEG_3786	729.592	0.511734	0.312625	1.63689	0.101653	0.999304	510.677	461.757	835.027	708.422	1046.32	815.351	MSMEG_RS18355	amino acid deaminase
MSMEG_6182	2712.95	0.511128	0.214757	2.38003	0.0173112	0.730318	2160.8	2436.38	2113.7	3169.78	2738.86	3658.2	MSMEG_RS29825	phage holin family protein
MSMEG_1791	1651.52	0.510914	0.403725	1.2655	0.205692	0.999304	628.774	1602.99	1856.36	1645.85	1707.36	2467.81	MSMEG_RS08705	UsfY protein
MSMEG_6213	9278.1	0.510747	0.431603	1.18337	0.236662	0.999304	3243.63	10094.9	9620.9	9618.06	8389.25	14701.9	MSMEG_RS29965	manganese catalase family protein
MSMEG_3636	390.845	0.510716	0.248269	2.05711	0.0396757	0.974076	342.968	334.167	290.852	418.463	563.106	395.515	MSMEG_RS17650	iron ABC transporter substrate-binding protein
MSMEG_3274	217.584	0.510328	0.284931	1.79106	0.0732839	0.999304	181.19	200.5	158.159	189.462	317.633	258.557	MSMEG_RS15910	MerR family transcriptional regulator
MSMEG_6118	13.9875	0.50968	0.550358	0.926088	0.3544	0.999304	10.2459	12.1515	12.063	14.8274	11.5971	23.0397	MSMEG_RS29515	IclR family transcriptional regulator
MSMEG_1758	568.6	0.509649	0.565002	0.902032	0.36704	0.999304	127.804	619.727	660.784	632.637	351.78	1018.87	MSMEG_RS33525	hypothetical protein
MSMEG_4568	449.292	0.50917	0.219496	2.31972	0.0203558	0.767418	348.36	399.987	365.911	456.356	581.146	543.994	MSMEG_RS22055	ribonuclease Z
MSMEG_0497	104.468	0.508733	0.301984	1.68463	0.092059	0.999304	70.6427	97.2121	92.4829	95.5546	126.28	144.638	MSMEG_RS02420	propanediol/glycerol family dehydratase large subunit
MSMEG_3522	619.301	0.508484	0.353722	1.43752	0.15057	0.999304	494.499	504.288	537.473	472.83	1130.72	575.993	MSMEG_RS17110	dopamine receptor D4
MSMEG_4743	307.282	0.507549	0.235986	2.15076	0.0314954	0.890909	226.488	303.788	231.877	344.326	374.974	362.236	MSMEG_RS22890	DUF899 family protein
MSMEG_3184	7120.97	0.507235	0.442054	1.14745	0.251196	0.999304	2709.23	8300.5	6637.32	5527.34	7348.08	12203.4	MSMEG_RS15460	malto-oligosyltrehalose trehalohydrolase
MSMEG_0088	308.373	0.505984	0.28336	1.78566	0.074155	0.999304	214.624	333.154	217.134	395.398	386.572	303.357	MSMEG_RS00435	phosphoenolpyruvate--protein phosphotransferase
MSMEG_3611	4077.79	0.505937	0.398872	1.26842	0.204648	0.999304	1716.46	4144.68	4250.19	4038.01	3660.19	6657.2	MSMEG_RS17525	phosphoketolase family protein
MSMEG_5652	40.8948	0.505873	0.462933	1.09276	0.274501	0.999304	45.2976	28.3535	28.147	24.7124	68.9386	49.9194	MSMEG_RS27240	alpha/beta fold hydrolase
MSMEG_6585	325.759	0.504722	0.340204	1.48359	0.137918	0.999304	176.337	394.924	237.239	393.751	335.029	417.275	MSMEG_RS31750	acyl-CoA/acyl-ACP dehydrogenase
MSMEG_2967	7.83805	0.504321	0.765911	0.658458	0.510244	0.999304	6.47109	3.03788	10.7227	4.94248	14.1743	7.67991	MSMEG_RS14410	flavin reductase family protein
MSMEG_5412	5205.3	0.504246	0.25497	1.97767	0.0479662	0.999304	3136.86	5139.08	4640.23	5962.28	5895.86	6457.53	MSMEG_RS26075	MPT63 family protein
MSMEG_1403	4547.97	0.504041	0.253964	1.9847	0.0471784	0.999304	4292.49	3295.09	3697.98	4311.49	6636.14	5054.66	MSMEG_RS06855	cutinase family protein
MSMEG_2848	15.1867	0.502353	0.626021	0.802453	0.422291	0.999304	21.031	10.1263	5.36133	14.8274	14.1743	25.5997	MSMEG_RS13810	MFS transporter
MSMEG_3447	973.098	0.501902	0.384579	1.30507	0.19187	0.999304	1072.04	566.058	776.052	1415.2	621.736	1387.5	MSMEG_RS16750	response regulator transcription factor
MSMEG_3139	2962.59	0.501047	0.190641	2.62822	0.0085834	0.612919	2649.91	2470.81	2238.35	3262.04	3638.28	3516.12	MSMEG_RS15240	enoyl-CoA hydratase
MSMEG_5710	73.3212	0.500841	0.330219	1.51669	0.129344	0.999304	71.7212	54.6818	54.9536	100.497	95.3543	62.7193	MSMEG_RS27525	hypothetical protein
MSMEG_5260	318.766	0.500658	0.222891	2.2462	0.0246913	0.828049	296.052	231.891	262.705	373.981	356.29	391.676	MSMEG_RS25360	hypothetical protein
MSMEG_4064	451.519	0.500345	0.531032	0.942213	0.346084	0.999304	760.892	153.919	205.071	578.27	446.49	564.474	MSMEG_RS19675	NADP-dependent oxidoreductase
MSMEG_2522	45.1158	0.499996	0.454449	1.10022	0.271235	0.999304	35.591	35.4419	42.8906	34.5974	86.3343	35.8396	MSMEG_RS12235	ABC transporter permease
MSMEG_1803	13131.8	0.499904	0.395889	1.26274	0.206684	0.999304	5560.82	13872	13206.3	11909.7	12966.3	21275.9	MSMEG_RS08755	anti-sigma B factor RsbW
MSMEG_1336	3421.31	0.499896	0.341562	1.46356	0.143314	0.999304	3294.86	1701.21	3506.31	4202.75	2986.91	4835.78	MSMEG_RS06520	nitric oxide dioxygenase
MSMEG_2495	101.547	0.499192	0.335524	1.4878	0.136804	0.999304	91.1345	68.8586	93.8232	105.44	160.427	89.599	MSMEG_RS12100	Asp/Glu/hydantoin racemase
MSMEG_2398	844.882	0.499056	0.338279	1.47528	0.140137	0.999304	727.458	771.621	603.149	606.277	1418.72	942.069	MSMEG_RS11620	thiamine-phosphate kinase
MSMEG_0968	1894.93	0.49823	0.429612	1.15972	0.246162	0.999304	759.274	2194.36	1759.86	2031.36	1461.88	3162.84	MSMEG_RS04715	cytochrome P450
MSMEG_1294	310.376	0.496668	0.374928	1.3247	0.18527	0.999304	163.395	312.901	296.213	408.578	224.211	456.955	MSMEG_RS06325	2-oxo-4-hydroxy-4-carboxy-5-ureidoimidazoline decarboxylase
MSMEG_5388	797.694	0.496657	0.394468	1.25905	0.208011	0.999304	371.548	651.119	963.699	909.416	648.796	1241.59	MSMEG_RS25960	metal-sensitive transcriptional regulator
MSMEG_RS03180	6.49605	0.49557	0.880202	0.563018	0.573422	0.999304	8.08886	6.07576	1.34033	13.1799	7.73143	2.55997	MSMEG_RS03180	hypothetical protein
MSMEG_6243	43.4578	0.495235	0.353054	1.40272	0.160701	0.999304	42.6013	28.3535	36.189	56.0148	46.3886	51.1994	MSMEG_RS30115	nuclear transport factor 2 family protein
MSMEG_5342	6855.48	0.495126	0.47789	1.03607	0.300171	0.999304	2094.48	8080.76	6897.35	6537.25	5864.93	11658.1	MSMEG_RS25745	hypothetical protein
MSMEG_4565	305.491	0.495051	0.356099	1.39021	0.164466	0.999304	173.102	326.066	261.365	405.283	230.654	436.475	MSMEG_RS22045	aldo/keto reductase
MSMEG_5563	19.5389	0.494003	0.487843	1.01263	0.311239	0.999304	20.4918	15.1894	12.063	29.6549	23.1943	16.6398	MSMEG_RS26810	helix-turn-helix domain-containing protein
MSMEG_3858	4260.49	0.493532	0.243435	2.02737	0.0426251	0.999304	4213.22	2907.25	3495.59	4871.64	5736.08	4339.15	MSMEG_RS18700	RNA polymerase-binding protein RbpA
MSMEG_2947	180.357	0.493215	0.321551	1.53387	0.125063	0.999304	177.416	133.667	139.395	154.864	288.64	188.158	MSMEG_RS14310	cyclase family protein
MSMEG_1411	169.316	0.492951	0.295889	1.666	0.0957133	0.999304	114.862	144.806	164.861	187.814	246.117	157.438	MSMEG_RS06895	universal stress protein
[truncated: 6,020 more rows]
